# Supplementary material for: Reversal of cancer gene expression identifies repurposed drugs for diffuse intrinsic pontine glioma
Source: Acta Neuropathol Commun. 2022 Oct 23;10:150. doi: 10.1186/s40478-022-01463-z (PMC9590174; doi:10.1186/s40478-022-01463-z)
Supplement: Supplementary file 1 — Additional file 1: Table S1. The list of drugs with predicted reversal predicted reversal gene expression scores (sRGES) and experimental drug efficacy (AC50). [file 40478_2022_1463_MOESM1_ESM.xlsx]

## Sheet: Table_fig1C_st_jude
	pert_iname	mean	n	median	sd	sRGES	AC50
1	AG-14361	-0.123581	74	-0.180415	0.1838	-0.123581	30.3531
2	AS-605240	-0.113078	75	-0.0931465	0.225461	-0.113078	7.23745
3	AT-7519	-0.280992	52	-0.324774	0.228529	-0.280992	2.3485
4	AZ-628	-0.208246	47	-0.240126	0.17096	-0.208246	18.6548
5	AZD-5438	-0.254067	40	-0.329607	0.176514	-0.254067	11.7704
6	AZD-6482	-0.124281	36	-0.134043	0.216722	-0.124281	28.2051
7	AZD-8330	-0.19381	35	-0.184529	0.237198	-0.19381	0.10518
8	BI-2536	-0.162312	102	-0.20548	0.18219	-0.162312	20.931
9	BMS-509744	-0.127969	13	-0.113205	0.188156	-0.127969	16.6261
10	CGP-60474	-0.379518	53	-0.43009	0.195946	-0.379518	0.14818
11	GANT-61	-0.269445	4	-0.281085	0.089191	-0.269445	20.931
12	GSK-1904529A	-0.14506	28	-0.16948	0.18622	-0.14506	14.818
13	GW-0742	-0.123769	6	-0.15345	0.12902	-0.123769	29.5659
14	GW-441756	-0.114698	18	-0.143809	0.15787	-0.114698	18.6548
15	H-89	-0.142677	13	-0.201493	0.199216	-0.142677	18.6548
16	HA-14-1	-0.111936	5	-0.209983	0.213028	-0.111936	16.6261
17	ISOX	-0.298279	57	-0.304442	0.0848063	-0.298279	3.89801
18	JNJ-38877605	-0.144225	15	-0.186027	0.175181	-0.144225	22.208
19	JNJ-7706621	-0.252622	14	-0.311239	0.18806	-0.252622	12.0838
20	KN-62	-0.146571	11	-0.224408	0.178252	-0.146571	17.8745
21	KN-93	-0.185952	10	-0.227879	0.168526	-0.185952	14.9163
22	KU-0060648	-0.199524	70	-0.233592	0.137847	-0.199524	18.6548
23	KUC111774N	-0.235983	47	-0.247578	0.128806	-0.235983	5.89917
24	LY-294002	-0.133989	182	-0.155669	0.195065	-0.133989	5.89917
25	M-344	-0.334783	6	-0.335287	0.092386	-0.334783	1.38356
26	MGCD-265	-0.211689	25	-0.248466	0.133275	-0.211689	13.775
27	NU-7441	-0.145474	36	-0.17286	0.201814	-0.145474	23.485
28	OSI-027	-0.13868	54	-0.157127	0.187963	-0.13868	0.372212
29	PAC-1	-0.142575	52	-0.188494	0.170324	-0.142575	26.3506
30	PD-0325901	-0.150979	66	-0.179227	0.247427	-0.150979	1.32066
31	PF-431396	-0.199337	32	-0.244246	0.159201	-0.199337	6.05624
32	PHA-793887	-0.347813	59	-0.399165	0.160987	-0.347813	1.69581
33	SB-415286	-0.123417	13	-0.125693	0.167486	-0.123417	0.0104904
34	SN-38	-0.426682	76	-0.445576	0.118097	-0.426682	1.66261
35	TG-101348	-0.134942	77	-0.143905	0.162339	-0.134942	18.7765
36	U-0126	-0.165243	37	-0.189614	0.194832	-0.165243	16.6261
37	WYE-125132	-0.120887	65	-0.117549	0.179519	-0.120887	0.410711
38	YM-201636	-0.170224	22	-0.207114	0.160686	-0.170224	17.6405
39	ZM-336372	-0.230539	50	-0.245815	0.140312	-0.230539	4.68587
40	ZSTK-474	-0.132349	47	-0.159499	0.19732	-0.132349	2.07531

## Sheet: table_fig1c_CBTTC
	pert_iname	mean	n	median	sd	sRGES	AC50
1	AT-7519	-0.181059	52	-0.236025	0.181638	-0.181059	2.3485
2	AZ-628	-0.179644	47	-0.199734	0.126564	-0.179644	18.6548
3	AZD-5438	-0.12424	40	-0.127873	0.155389	-0.12424	11.7704
4	BMS-345541	-0.122525	50	-0.156897	0.187722	-0.122525	18.4205
5	BMS-777607	-0.104733	8	-0.163487	0.15858	-0.104733	18.6548
6	CGP-60474	-0.242801	53	-0.319207	0.170142	-0.242801	0.14818
7	GANT-61	-0.17161	4	-0.175235	0.15516	-0.17161	20.931
8	GSK-1904529A	-0.146327	28	-0.186832	0.166522	-0.146327	14.818
9	GW-0742	-0.123352	6	-0.162178	0.0994403	-0.123352	29.5659
10	GW-441756	-0.118663	18	-0.121014	0.140768	-0.118663	18.6548
11	ISOX	-0.263862	57	-0.267632	0.0578216	-0.263862	3.89801
12	IWP-2	-0.161288	1	-0.161288	NA	-0.161288	9.34955
13	JNJ-7706621	-0.164849	14	-0.226886	0.195457	-0.164849	12.0838
14	KU-60019	-0.12334	18	-0.171357	0.123274	-0.12334	18.6548
15	KUC111774N	-0.129487	47	-0.152945	0.103298	-0.129487	5.89917
16	M-344	-0.289832	6	-0.278384	0.0896167	-0.289832	1.38356
17	MGCD-265	-0.164426	25	-0.203712	0.146646	-0.164426	13.775
18	NU-7441	-0.124594	36	-0.165048	0.150931	-0.124594	23.485
19	PD-0325901	-0.131611	66	-0.169215	0.150389	-0.131611	1.32066
20	PF-431396	-0.101654	32	-0.106207	0.140759	-0.101654	6.05624
21	PHA-793887	-0.205167	59	-0.19908	0.15121	-0.205167	1.69581
22	SB-415286	-0.114812	13	-0.169718	0.159446	-0.114812	0.0104904
23	SB-525334	-0.142283	23	-0.179407	0.135037	-0.142283	12.8085
24	SN-38	-0.352529	76	-0.377904	0.132874	-0.352529	1.66261
25	TAK-715	-0.132622	25	-0.176944	0.163705	-0.132622	22.3239
26	TWS-119	-0.124619	49	-0.177059	0.162413	-0.124619	11.7704
27	YM-201636	-0.125576	22	-0.198801	0.169187	-0.125576	17.6405
28	ZM-336372	-0.183472	50	-0.196702	0.114181	-0.183472	4.68587

## Sheet: table_fig1c_scRNAseq
	pert_iname	mean	n	median	sd	sRGES	AC50
1	ABT-737	-0.145707	38	-0.165157	0.184729	-0.145707	7.11598
2	AG-14361	-0.108411	74	-0.153092	0.161541	-0.108411	30.3531
3	AT-7519	-0.150566	52	-0.183897	0.169357	-0.150566	2.3485
4	AZD-1480	-0.18656	15	-0.284713	0.20567	-0.18656	9.34955
5	AZD-5438	-0.133459	40	-0.152097	0.14473	-0.133459	11.7704
6	AZD-6482	-0.20186	36	-0.240892	0.164951	-0.20186	28.2051
7	AZD-7545	-0.140691	22	-0.192006	0.171719	-0.140691	13.1805
8	AZD-8055	-0.355199	96	-0.374193	0.136231	-0.355199	0.263506
9	AZD-8330	-0.258122	35	-0.285306	0.205537	-0.258122	0.10518
10	BI-2536	-0.198218	102	-0.231773	0.168657	-0.198218	20.931
11	BIX-02189	-0.157207	12	-0.163773	0.168066	-0.157207	14.818
12	BMS-509744	-0.195557	13	-0.187135	0.13418	-0.195557	16.6261
13	BMS-754807	-0.206872	43	-0.183501	0.166149	-0.206872	0.263506
14	CGP-60474	-0.194411	53	-0.210065	0.156431	-0.194411	0.14818
15	GANT-61	-0.36477	4	-0.379325	0.130635	-0.36477	20.931
16	GSK-690693	-0.159846	30	-0.160075	0.204988	-0.159846	12.0264
17	GW-441756	-0.169967	18	-0.202751	0.149994	-0.169967	18.6548
18	H-89	-0.265756	13	-0.284401	0.110809	-0.265756	18.6548
19	HA-14-1	-0.105614	5	-0.168532	0.200714	-0.105614	16.6261
20	ISOX	-0.161002	57	-0.191272	0.121893	-0.161002	3.89801
21	IWP-2	-0.240307	1	-0.240307	NA	-0.240307	9.34955
22	JNJ-38877605	-0.101608	15	-0.0359549	0.169993	-0.101608	22.208
23	JNJ-7706621	-0.125338	14	-0.170566	0.175364	-0.125338	12.0838
24	KI-8751	-0.262084	19	-0.269718	0.128234	-0.262084	12.0264
25	KN-62	-0.179151	11	-0.204769	0.126074	-0.179151	17.8745
26	KN-93	-0.288332	10	-0.285319	0.121586	-0.288332	14.9163
27	KU-0060648	-0.306858	70	-0.29256	0.150334	-0.306858	18.6548
28	KU-0063794	-0.245894	38	-0.274779	0.140279	-0.245894	0.351719
29	KUC111774N	-0.368143	47	-0.352729	0.111146	-0.368143	5.89917
30	LY-294002	-0.232684	182	-0.246237	0.193493	-0.232684	5.89917
31	MG-132	-0.326645	47	-0.327728	0.127403	-0.326645	3.86113
32	MK-2206	-0.286508	69	-0.300229	0.154912	-0.286508	13.2942
33	NU-7441	-0.13811	36	-0.201793	0.223735	-0.13811	23.485
34	OSI-027	-0.36066	54	-0.354666	0.127493	-0.36066	0.372212
35	OSI-930	-0.126119	11	-0.151327	0.161903	-0.126119	22.208
36	PAC-1	-0.199298	52	-0.216024	0.123558	-0.199298	26.3506
37	PF-431396	-0.206091	32	-0.202373	0.124472	-0.206091	6.05624
38	PHA-793887	-0.243991	59	-0.243077	0.149375	-0.243991	1.69581
39	PI-103	-0.275478	87	-0.279738	0.155591	-0.275478	0.214796
40	PIK-90	-0.126818	39	-0.088368	0.133829	-0.126818	8.33279
41	PK-11195	-0.10459	24	-0.124523	0.225909	-0.10459	13.2066
42	PNU-74654	-0.153076	43	-0.178712	0.146617	-0.153076	23.9957
43	SCH-79797	-0.280863	36	-0.31708	0.143678	-0.280863	20.931
44	SN-38	-0.347008	76	-0.362666	0.138878	-0.347008	1.66261
45	SNS-314	-0.181934	10	-0.20036	0.14164	-0.181934	8.58327
46	SSR-69071	-0.181946	15	-0.259329	0.167156	-0.181946	37.2212
47	TG-101348	-0.205295	77	-0.193149	0.174609	-0.205295	18.7765
48	TGX-221	-0.161443	20	-0.135201	0.173788	-0.161443	20.931
49	TW-37	-0.187828	39	-0.22117	0.141672	-0.187828	37.2212
50	U-0126	-0.140057	37	-0.159243	0.173825	-0.140057	16.6261
51	VER-155008	-0.104212	22	-0.16802	0.154743	-0.104212	15.9572
52	WYE-125132	-0.404643	65	-0.418405	0.101786	-0.404643	0.410711
53	WYE-354	-0.203846	15	-0.180372	0.185696	-0.203846	0.0517055
54	XL-147	-0.16595	16	-0.191485	0.130646	-0.16595	1.69683
55	Y-39983	-0.158686	20	-0.156391	0.153003	-0.158686	26.3506
56	YM-201636	-0.14868	22	-0.143518	0.169988	-0.14868	17.6405
57	ZM-336372	-0.109009	50	-0.147714	0.154235	-0.109009	4.68587
58	ZSTK-474	-0.328153	47	-0.365253	0.173596	-0.328153	2.07531

## Sheet: table_fig1c_meta
	pert_iname	mean	n	median	sd	sRGES	AC50
1	AG-14361	-0.131212	74	-0.208106	0.231595	-0.131212	30.3531
2	AS-605240	-0.147383	75	-0.183574	0.267733	-0.147383	7.23745
3	AT-7519	-0.326053	52	-0.374341	0.251692	-0.326053	2.3485
4	AZ-628	-0.219854	47	-0.221768	0.201223	-0.219854	18.6548
5	AZD-5438	-0.276963	40	-0.353519	0.204863	-0.276963	11.7704
6	AZD-7545	-0.10755	22	-0.147615	0.212992	-0.10755	13.1805
7	AZD-8330	-0.24735	35	-0.348384	0.288487	-0.24735	0.10518
8	BI-2536	-0.121529	102	-0.109521	0.22582	-0.121529	20.931
9	BIX-02189	-0.105468	12	-0.200487	0.27363	-0.105468	14.818
10	BMS-509744	-0.123851	13	-0.122834	0.236261	-0.123851	16.6261
11	BMS-777607	-0.155666	8	-0.234452	0.216889	-0.155666	18.6548
12	CGP-60474	-0.424868	53	-0.483393	0.233131	-0.424868	0.14818
13	GANT-61	-0.311573	4	-0.312117	0.0616858	-0.311573	20.931
14	GSK-1904529A	-0.16611	28	-0.181402	0.181832	-0.16611	14.818
15	GW-0742	-0.152165	6	-0.141169	0.145067	-0.152165	29.5659
16	H-89	-0.127612	13	-0.159667	0.26322	-0.127612	18.6548
17	ISOX	-0.315155	57	-0.324809	0.109537	-0.315155	3.89801
18	IWP-2	-0.166507	1	-0.166507	NA	-0.166507	9.34955
19	JNJ-38877605	-0.140175	15	-0.186684	0.231042	-0.140175	22.208
20	JNJ-7706621	-0.256181	14	-0.316682	0.240528	-0.256181	12.0838
21	KN-62	-0.180325	11	-0.219368	0.173059	-0.180325	17.8745
22	KN-93	-0.216008	10	-0.268675	0.200626	-0.216008	14.9163
23	KU-0060648	-0.158947	70	-0.185973	0.181207	-0.158947	18.6548
24	KUC111774N	-0.23951	47	-0.232198	0.135803	-0.23951	5.89917
25	M-344	-0.377521	6	-0.370806	0.0799416	-0.377521	1.38356
26	MGCD-265	-0.230832	25	-0.250753	0.170125	-0.230832	13.775
27	NU-7441	-0.170412	36	-0.237709	0.219343	-0.170412	23.485
28	PAC-1	-0.169346	52	-0.165627	0.18465	-0.169346	26.3506
29	PD-0325901	-0.179475	66	-0.176023	0.302486	-0.179475	1.32066
30	PF-431396	-0.247723	32	-0.293992	0.196336	-0.247723	6.05624
31	PHA-793887	-0.385189	59	-0.475181	0.232645	-0.385189	1.69581
32	SB-415286	-0.160557	13	-0.207784	0.213943	-0.160557	0.0104904
33	SN-38	-0.537444	76	-0.56202	0.158484	-0.537444	1.66261
34	STF-62247	-0.110815	5	-0.0301264	0.161585	-0.110815	20.931
35	TG-101348	-0.101216	77	-0.0889479	0.208369	-0.101216	18.7765
36	TW-37	-0.11156	39	-0.0848051	0.142973	-0.11156	37.2212
37	U-0126	-0.153484	37	-0.159493	0.238575	-0.153484	16.6261
38	YM-201636	-0.168534	22	-0.195235	0.212573	-0.168534	17.6405
39	ZM-336372	-0.24311	50	-0.263611	0.167563	-0.24311	4.68587

## Sheet: Table_1_comparison_of_signature
name	correlation
meta signature	0.61
Anastas Cancer Cell 2019 KDM1A (up/down)	-0.12
Anastas Cancer Cell 2019 survival	0.03
Pathania Cancer Cell 2017 K27M pHGG	0.1
Paugh JCO 2011 DIPGvsHGG	0.21
Saratsis Acta 2013 DIPGvsOther	0.03
Saratsis Acta 2013 DIPGvsNormal	-0.16

## Sheet: Table_2_meta_dz_signature
GeneSymbol	Value (log2 fold change)	padj	identifier
ABALON	1.90186	1.15e-08	ENSG00000281376
ABCA1	1.55081	2.58e-06	ENSG00000165029
ABCA9	-2.46361	0.00307492	ENSG00000154258
ABCB4	3.17677	1.39e-41	ENSG00000005471
ABCC1	1.34608	1e-09	ENSG00000103222
ABCC2	1.2838	3.57e-05	ENSG00000023839
ABHD11	-1.28744	3.17e-09	ENSG00000106077
ABHD14A	-1.28725	0.000372769	ENSG00000248487
ABHD8	-1.19004	0.00122571	ENSG00000127220
ABLIM2	-1.59777	2.94e-06	ENSG00000163995
AC000403.4	-2.16692	0.00198678	ENSG00000278727
AC002310.14	1.11086	1.24e-10	ENSG00000278922
AC004057.1	-3.82314	2.93e-14	ENSG00000196656
AC004076.5	1.59971	1.39e-12	ENSG00000276449
AC004540.4	2.07231	4.98e-08	ENSG00000225792
AC004540.5	1.58292	0.000300217	ENSG00000214870
AC004603.4	-3.54743	0.000446071	ENSG00000225877
AC004623.3	1.4739	0.00396229	ENSG00000279488
AC004951.6	2.92712	5.86e-17	ENSG00000228434
AC005062.2	-1.45708	5.49e-10	ENSG00000243004
AC005330.2	-1.9866	4.52e-06	ENSG00000267372
AC005481.5	3.68985	7.58e-18	ENSG00000222012
AC005754.8	1.92959	3.47e-05	ENSG00000272108
AC005943.2	3.75227	1.28e-07	ENSG00000267059
AC006946.15	-2.65923	8.01e-10	ENSG00000235478
AC006946.16	1.25822	3.93e-09	ENSG00000273203
AC007163.3	-3.42257	4.44e-08	ENSG00000237166
AC007191.4	2.15328	1.64e-29	ENSG00000279407
AC007192.6	-6.1058	6.58e-17	ENSG00000269145
AC007292.3	2.26536	1.17e-06	ENSG00000269318
AC007405.6	-1.62155	0.0131817	ENSG00000239467
AC007620.3	1.88994	5.48e-11	ENSG00000242539
AC009237.8	2.22271	4.56e-17	ENSG00000229689
AC010649.1	-6.85827	5.68e-13	ENSG00000267448
AC011330.13	-1.93796	2.26e-15	ENSG00000275601
AC011516.2	-5.67551	1.15e-10	ENSG00000268038
AC012314.8	1.43042	5.11e-05	ENSG00000237017
AC012354.6	-6.44405	3.07e-08	ENSG00000225156
AC018647.3	-3.16684	2.69e-05	ENSG00000227544
AC063976.7	3.51245	1.53e-21	ENSG00000224431
AC068831.15	-5.96681	9.73e-15	ENSG00000259661
AC069282.6	-0.0347044	0.000152072	ENSG00000225507
AC084219.3	1.88867	0.000302824	ENSG00000267163
AC108142.1	1.89207	0.0184615	ENSG00000177822
AC110615.1	-5.76858	0.00993487	ENSG00000279909
AC113188.2	-4.722	4e-20	ENSG00000279535
AC131097.4	-3.19695	1.1e-10	ENSG00000216921
AC139100.4	1.48107	0.00303712	ENSG00000278000
AC141928.1	-1.80772	0.00165788	ENSG00000250986
AC145676.2	2.98402	1.05e-11	ENSG00000249852
ACAA2	-1.39855	2.97e-07	ENSG00000167315
ACADSB	-1.47267	9.99e-10	ENSG00000196177
ACAN	4.97229	8.91e-80	ENSG00000157766
ACSBG1	-2.05595	0.00814355	ENSG00000103740
ACSL5	-2.23558	4.72e-05	ENSG00000197142
ACTR10	-1.34589	7.19e-25	ENSG00000131966
ACTR3B	-1.75176	4.49e-07	ENSG00000133627
ACVR1C	-2.09129	5.49e-06	ENSG00000123612
ACVR2B	1.65312	5.48e-17	ENSG00000114739
ACYP1	-1.20527	1.14e-09	ENSG00000119640
ADAMTS12	2.51284	4.27e-11	ENSG00000151388
ADAMTS15	3.1561	3.26e-25	ENSG00000166106
ADAMTS17	1.45282	0.000109647	ENSG00000140470
ADAMTS3	1.48059	0.00790027	ENSG00000156140
ADAMTS6	1.70576	3.77e-07	ENSG00000049192
ADAMTS7	2.18577	5.85e-17	ENSG00000136378
ADAMTS7P1	-1.82507	0.0110907	ENSG00000274376
ADAMTSL5	-3.12595	5.4e-08	ENSG00000185761
ADAP1	-1.96627	1.15e-05	ENSG00000105963
ADAT3	1.24284	4.34e-07	ENSG00000213638
ADGRL3	1.57838	2.02e-08	ENSG00000150471
ADH1B	-4.8011	0.00464152	ENSG00000196616
ADIRF	-2.19582	2.59e-05	ENSG00000148671
ADORA2A-AS1	1.55191	0.0141508	ENSG00000178803
ADPGK-AS1	-0.187115	0.00734607	ENSG00000260898
ADRA2C	-1.90727	0.0217798	ENSG00000184160
AF127577.10	-5.80994	0.0201899	ENSG00000229047
AF131215.2	1.66169	8.06e-25	ENSG00000255310
AF131216.5	-2.56993	4.39e-06	ENSG00000255020
AFAP1	1.65248	7.45e-26	ENSG00000196526
AFAP1L2	1.59115	1.39e-11	ENSG00000169129
AGPAT4-IT1	2.40454	1.59e-13	ENSG00000279355
AGRN	2.04853	1.01e-42	ENSG00000188157
AHR	1.82946	4.11e-06	ENSG00000106546
AHRR	1.37497	0.00474916	ENSG00000063438
AIF1	-1.75738	0.0223986	ENSG00000204472
AIFM3	-2.12908	0.00412288	ENSG00000183773
AK5	-3.52374	1.02e-14	ENSG00000154027
AK7	-3.04466	2.48e-06	ENSG00000140057
AKTIP	-1.53668	5.36e-22	ENSG00000166971
AL589743.1	2.78889	9.22e-15	ENSG00000279508
ALB	-3.02963	9.47e-06	ENSG00000163631
ALDH1A1	-3.4414	2.76e-07	ENSG00000165092
ALDH1L2	1.29929	2.71e-07	ENSG00000136010
ALDH2	-1.86732	1.15e-09	ENSG00000111275
ALDOC	-1.72308	0.00979543	ENSG00000109107
ALG10B	1.31357	1.54e-11	ENSG00000175548
ALK	2.52978	3.1e-17	ENSG00000171094
AMACR	-1.30202	0.000101465	ENSG00000242110
AMER1	1.3675	2.7e-10	ENSG00000184675
AMH	2.52152	7.27e-15	ENSG00000104899
AMN1	-1.75423	1.51e-11	ENSG00000151743
AMOTL2	1.2784	1.93e-06	ENSG00000114019
AMY2A	-3.88659	1.51e-12	ENSG00000243480
ANAPC15	-1.94838	5.28e-30	ENSG00000110200
ANGPTL2	2.49002	1.24e-28	ENSG00000136859
ANKFN1	1.92835	0.000153505	ENSG00000153930
ANKK1	-3.16662	2.16e-16	ENSG00000170209
ANKRD10-IT1	-0.107831	1.26e-09	ENSG00000229152
ANKRD19P	-2.17503	0.000381088	ENSG00000187984
ANKRD20A1	3.1351	1.05e-23	ENSG00000260691
ANKRD20A2	3.73638	1.33e-20	ENSG00000183148
ANKRD20A3	3.14278	8.14e-08	ENSG00000276203
ANKRD20A4	2.60754	1.17e-08	ENSG00000172014
ANKRD24	-1.78088	0.00646343	ENSG00000089847
ANKRD29	-1.42597	3.04e-06	ENSG00000154065
ANKRD30BL	-0.070347	0.0235135	ENSG00000163046
ANKRD34B	-4.57119	2.85e-06	ENSG00000189127
ANKRD50	1.56594	1.05e-09	ENSG00000151458
ANKRD65	-1.45646	0.00167242	ENSG00000235098
ANO3	-3.24904	0.00788521	ENSG00000134343
ANOS1	2.42357	8.77e-18	ENSG00000011201
ANXA2P2	-1.82915	0.0010122	ENSG00000231991
ANXA3	-3.00406	5.19e-07	ENSG00000138772
ANXA7	-1.44773	1.39e-27	ENSG00000138279
AP000439.1	-2.41256	0.0136652	ENSG00000255980
AP000648.5	1.9254	2.22e-12	ENSG00000280385
AP001189.4	-2.33252	9.8e-05	ENSG00000236304
AP003419.11	-6.92225	8.71e-19	ENSG00000256514
AP3S1	-1.43609	1.23e-15	ENSG00000177879
APC2	1.68555	2.13e-07	ENSG00000115266
APCDD1	1.42279	0.000136444	ENSG00000154856
APOD	-2.0692	2.05e-07	ENSG00000189058
APOL1	-2.34357	0.00999843	ENSG00000100342
APOL3	-1.97633	4.25e-05	ENSG00000128284
APOO	-1.35075	7.24e-13	ENSG00000184831
AR	1.99764	1.55e-05	ENSG00000169083
ARAP1-AS2	1.90955	1e-22	ENSG00000245148
ARHGAP11A	2.58377	5.72e-31	ENSG00000198826
ARHGAP11B	2.4447	7.44e-33	ENSG00000187951
ARHGAP19-SLIT1	3.10915	1.55e-07	ENSG00000269891
ARHGAP44	-1.45405	0.0132653	ENSG00000006740
ARHGDIG	-2.15018	1.21e-05	ENSG00000242173
ARHGEF15	-1.42649	0.0125952	ENSG00000198844
ARL10	1.38319	8.54e-16	ENSG00000175414
ARL2	-1.39062	2.15e-14	ENSG00000213465
ARL4C	1.43786	6.36e-09	ENSG00000188042
ARPC5L	-1.26769	1.23e-11	ENSG00000136950
ARPP21	-2.63589	0.0155488	ENSG00000172995
ARRB1	-1.41358	0.000810063	ENSG00000137486
ARSI	-2.65171	0.000422769	ENSG00000183876
ARSJ	1.76836	9.38e-08	ENSG00000180801
ARX	-6.22265	1.49e-12	ENSG00000004848
ASCL1	2.53692	6.09e-24	ENSG00000139352
ASCL5	2.66585	2.1e-32	ENSG00000232237
ASF1B	2.99217	1.14e-21	ENSG00000105011
ASIC4	2.319	3.55e-13	ENSG00000072182
ASPA	-2.76108	3.34e-05	ENSG00000108381
ASPDH	-2.91712	3.51e-19	ENSG00000204653
ASPHD1	-2.86111	2.59e-08	ENSG00000174939
ASPM	6.39052	9.59e-120	ENSG00000066279
ASRGL1	-1.81436	7.7e-09	ENSG00000162174
ASTN2	1.57175	4.61e-11	ENSG00000148219
ATAD2	1.22743	1.72e-08	ENSG00000156802
ATAD5	2.04332	3.58e-23	ENSG00000176208
ATF7IP	1.56747	1.27e-19	ENSG00000171681
ATL1	-1.54505	1.68e-06	ENSG00000198513
ATOH7	-1.89586	0.00296383	ENSG00000179774
ATOX1	-1.40162	5.18e-07	ENSG00000177556
ATP1A4	2.20192	4.61e-13	ENSG00000132681
ATP5E	-1.02722	9.74e-14	ENSG00000124172
ATP5G1	-1.52331	2.69e-29	ENSG00000159199
ATP5G3	-1.21321	2.22e-22	ENSG00000154518
ATP5H	-1.35492	5.41e-34	ENSG00000167863
ATP5I	-1.32229	6.49e-13	ENSG00000169020
ATP5J	-1.26994	5.9e-21	ENSG00000154723
ATP5J2-PTCD1	1.26865	4.17e-07	ENSG00000248919
ATP5L	-1.11713	3.01e-20	ENSG00000167283
ATP6V0C	-1.21018	4.45e-10	ENSG00000185883
ATP6V1D	-1.32768	2.34e-16	ENSG00000100554
ATP6V1E1	-1.73526	5.53e-29	ENSG00000131100
ATP6V1G2	-2.36397	2.93e-05	ENSG00000213760
ATP6V1H	-1.61215	3.75e-14	ENSG00000047249
ATPAF1	-1.38402	1.55e-13	ENSG00000123472
AURKA	2.4574	6.33e-38	ENSG00000087586
AURKB	3.68094	2.12e-13	ENSG00000178999
AVPI1	-1.31158	4.34e-06	ENSG00000119986
B3GALT4	-1.0909	2.12e-06	ENSG00000235863
B3GNT7	1.82214	3.15e-06	ENSG00000156966
BACE2	1.14378	0.0100717	ENSG00000182240
BACH2	2.24671	2.73e-35	ENSG00000112182
BAHD1	1.25285	1.86e-26	ENSG00000140320
BANK1	-2.16137	1.15e-06	ENSG00000153064
BARD1	1.77113	2.31e-22	ENSG00000138376
BCAN	3.4065	5.99e-30	ENSG00000132692
BCAT1	1.60741	3.99e-07	ENSG00000060982
BCHE	2.94751	2.07e-46	ENSG00000114200
BCL7B	-1.27783	5.65e-16	ENSG00000106635
BCORL1	1.37737	2.14e-10	ENSG00000085185
BDH2	-1.69325	2.7e-07	ENSG00000164039
BEAN1	1.67921	1.04e-05	ENSG00000166546
BEND4	3.71483	3.35e-35	ENSG00000188848
BEND7	1.17478	3.02e-10	ENSG00000165626
BEX1	-2.2677	7.03e-13	ENSG00000133169
BEX2	-2.41303	7.33e-20	ENSG00000133134
BEX4	-1.50522	1.35e-10	ENSG00000102409
BEX5	-3.18435	3.23e-15	ENSG00000184515
BFSP1	-1.61752	7.51e-07	ENSG00000125864
BHLHE22	-5.18918	3.57e-12	ENSG00000180828
BHMT2	-2.88691	1.75e-18	ENSG00000132840
BICD1	1.75167	2.89e-18	ENSG00000151746
BIRC5	4.92492	2.52e-87	ENSG00000089685
BIVM-ERCC5	3.43078	0.00093595	ENSG00000270181
BLM	1.72133	1.71e-13	ENSG00000197299
BLOC1S2	-1.68663	1e-26	ENSG00000196072
BLOC1S5-TXNDC5	-3.86551	1.63e-21	ENSG00000259040
BLVRB	-1.19756	7e-06	ENSG00000090013
BMF	1.94533	7.6e-15	ENSG00000104081
BMP2	2.01182	1.48e-07	ENSG00000125845
BMP8B	1.4727	1.37e-06	ENSG00000116985
BMPER	2.30212	2.1e-14	ENSG00000164619
BNIPL	2.3799	6.53e-16	ENSG00000163141
BOLA3	-1.54571	7.93e-20	ENSG00000163170
BRCA1	1.51605	7.08e-14	ENSG00000012048
BRCA2	2.50792	1.15e-08	ENSG00000139618
BRIP1	3.33534	2.46e-39	ENSG00000136492
BSCL2	-2.54482	1.32e-16	ENSG00000168000
BSPRY	-3.97486	2.14e-10	ENSG00000119411
BTBD16	-3.10994	9.88e-07	ENSG00000138152
BTBD17	3.02921	1.71e-22	ENSG00000204347
BTN2A3P	1.83095	0.00135944	ENSG00000124549
BUB1	4.78488	4.77e-90	ENSG00000169679
BUB1B	4.78488	9.06e-80	ENSG00000156970
C10orf142	-2.53902	1.86e-09	ENSG00000277288
C10orf35	-1.71628	3.5e-09	ENSG00000171224
C11orf1	-1.42437	1.33e-16	ENSG00000137720
C11orf84	1.15073	2.66e-08	ENSG00000168005
C11orf88	-3.98103	0.00439938	ENSG00000183644
C11orf98	-1.16602	1.2e-10	ENSG00000278615
C14orf1	-1.32578	2.53e-20	ENSG00000133935
C14orf2	-2.12911	5.96e-37	ENSG00000156411
C15orf65	-1.268	2.14e-05	ENSG00000261652
C16orf86	-1.3205	0.000940224	ENSG00000159761
C16orf89	-1.69369	0.00189088	ENSG00000153446
C17orf53	2.32934	1.62e-36	ENSG00000125319
C18orf32	-1.44671	6.89e-14	ENSG00000177576
C18orf54	1.54051	3.72e-11	ENSG00000166845
C19orf57	1.99496	5.13e-39	ENSG00000132016
C1orf106	2.96148	3.23e-34	ENSG00000163362
C1orf112	1.0084	3.58e-07	ENSG00000000460
C1orf115	-2.44445	8.6e-10	ENSG00000162817
C1orf162	-1.51274	0.000422689	ENSG00000143110
C1orf220	1.82128	4.51e-16	ENSG00000213057
C1orf226	2.88713	2.51e-66	ENSG00000239887
C1orf54	-1.76984	9.81e-10	ENSG00000118292
C1orf87	-4.53378	6e-08	ENSG00000162598
C1orf94	1.94435	1.35e-07	ENSG00000142698
C1QL1	3.99136	4.77e-88	ENSG00000131094
C1QL4	3.76184	4.88e-21	ENSG00000186897
C20orf195	1.52121	0.000317469	ENSG00000125531
C2orf27A	1.68906	4.45e-23	ENSG00000197927
C2orf44	1.17022	1.64e-19	ENSG00000163026
C2orf74	-2.05751	1.13e-23	ENSG00000237651
C3orf14	-1.63075	1.83e-09	ENSG00000114405
C3orf67	1.72826	1.34e-06	ENSG00000163689
C4B	1.62663	7.69e-07	ENSG00000224389
C4orf50	-2.64795	0.000202724	ENSG00000181215
C5orf38	1.99779	0.00669781	ENSG00000186493
C5orf64	-2.42622	0.0106876	ENSG00000178722
C6orf136	-1.35782	9.84e-16	ENSG00000204564
C7orf55	-1.10326	1.93e-07	ENSG00000164898
C9orf116	-1.59023	0.00780237	ENSG00000160345
C9orf135	-6.24364	1.29e-09	ENSG00000204711
C9orf24	-3.67918	5.91e-17	ENSG00000164972
CA11	-3.45339	5.15e-14	ENSG00000063180
CA3	2.06894	4.77e-11	ENSG00000164879
CA4	-2.92428	6.44e-05	ENSG00000167434
CA7	-4.10663	3.34e-06	ENSG00000168748
CAB39L	-1.11844	0.000274202	ENSG00000102547
CABIN1	1.19935	4.7e-26	ENSG00000099991
CABP1	-2.98293	7.63e-06	ENSG00000157782
CACNA1F	-2.55487	5.1e-11	ENSG00000102001
CACNA1I	-1.80818	0.0319203	ENSG00000100346
CACNA2D3	-1.70064	0.000256739	ENSG00000157445
CACNG3	-6.18384	8.51e-14	ENSG00000006116
CACNG4	1.71698	0.00350456	ENSG00000075461
CACTIN-AS1	1.47257	0.000623522	ENSG00000226800
CALCRL	1.94603	1.84e-18	ENSG00000064989
CALM1	-1.68335	3.1e-14	ENSG00000198668
CALM2	-1.77372	2.24e-20	ENSG00000143933
CALM3	-1.5533	3.1e-08	ENSG00000160014
CALY	-3.78417	4.55e-09	ENSG00000130643
CAMK1	-1.53284	1.56e-09	ENSG00000134072
CAMK1G	-4.56118	4.33e-15	ENSG00000008118
CAMK2A	-4.81501	4.7e-07	ENSG00000070808
CAMK2B	-2.26006	5.97e-07	ENSG00000058404
CAPN3	-2.49284	6.11e-05	ENSG00000092529
CAPN5	1.58076	8.83e-23	ENSG00000149260
CAPNS1	-1.14902	1.05e-12	ENSG00000126247
CARTPT	-5.54071	0.000320873	ENSG00000164326
CASC15	2.45282	2.41e-39	ENSG00000272168
CASC5	5.42963	5.67e-81	ENSG00000137812
CASK	1.50922	9.66e-14	ENSG00000147044
CASZ1	2.28073	2.69e-14	ENSG00000130940
CATSPER2	-1.21399	8.23e-06	ENSG00000166762
CBLN3	-1.89295	0.000149414	ENSG00000139899
CBLN4	-3.16009	0.0017742	ENSG00000054803
CBX2	4.73988	7.5e-169	ENSG00000173894
CBX4	1.18978	1.46e-06	ENSG00000141582
CBX5	1.51545	7.6e-19	ENSG00000094916
CBX7	-1.64297	6.11e-09	ENSG00000100307
CBX8	2.32141	9.66e-62	ENSG00000141570
CCBE1	-3.20373	5.73e-05	ENSG00000183287
CCDC108	-2.62575	0.0128105	ENSG00000181378
CCDC114	-4.18214	1.09e-05	ENSG00000105479
CCDC142	1.60625	1.44e-27	ENSG00000135637
CCDC150	1.47793	7.33e-07	ENSG00000144395
CCDC153	-2.21505	0.00274669	ENSG00000248712
CCDC169	1.09529	0.00190827	ENSG00000242715
CCDC176	-1.58127	5.52e-10	ENSG00000119636
CCDC18	1.66864	1.3e-18	ENSG00000122483
CCDC23	-1.21849	6.61e-19	ENSG00000177868
CCDC28A	-1.81292	3.1e-15	ENSG00000024862
CCDC53	-1.07266	6.38e-12	ENSG00000120860
CCDC64	-2.33076	1.85e-06	ENSG00000135127
CCDC68	-2.12338	0.000317167	ENSG00000166510
CCDC69	-1.40471	6.52e-06	ENSG00000198624
CCDC8	-2.61439	2.16e-07	ENSG00000169515
CCDC80	1.79041	7.63e-06	ENSG00000091986
CCDC85B	-1.64682	7.53e-05	ENSG00000175602
CCER2	1.27779	1.18e-07	ENSG00000262484
CCK	-6.91304	1.75e-18	ENSG00000187094
CCKBR	-2.97132	0.00208683	ENSG00000110148
CCL19	-5.69634	1.51e-08	ENSG00000172724
CCL3	-3.23563	0.00852814	ENSG00000277632
CCL4	-3.44098	3.93e-05	ENSG00000275302
CCL4L2	-3.41272	0.00247057	ENSG00000276070
CCM2L	-1.2663	0.000323063	ENSG00000101331
CCNA2	1.65586	2.98e-06	ENSG00000145386
CCNB1	2.1223	2.73e-26	ENSG00000134057
CCNB2	3.97574	1.04e-83	ENSG00000157456
CCND1	1.86626	4.49e-16	ENSG00000110092
CCND2	2.83853	6.9e-24	ENSG00000118971
CCNF	1.497	4.76e-13	ENSG00000162063
CCNI2	-2.0505	5.9e-14	ENSG00000205089
CCNO	-5.66623	1.19e-17	ENSG00000152669
CD101	2.62665	9.93e-26	ENSG00000134256
CD276	1.77632	1.16e-22	ENSG00000103855
CD40	-1.68701	5.93e-05	ENSG00000101017
CD44	1.3671	0.00544651	ENSG00000026508
CD59	-1.67485	7.82e-13	ENSG00000085063
CDA	-1.81281	2.82e-05	ENSG00000158825
CDC20	4.25627	6.18e-59	ENSG00000117399
CDC25A	1.85756	5.54e-13	ENSG00000164045
CDC6	1.36977	0.00106483	ENSG00000094804
CDCA2	4.31076	4.15e-68	ENSG00000184661
CDCA4	1.37972	1.3e-19	ENSG00000170779
CDCA5	3.06284	2.43e-60	ENSG00000146670
CDCA7	2.68957	9.62e-28	ENSG00000144354
CDCA7L	1.77861	6.01e-16	ENSG00000164649
CDCA8	2.95554	5.08e-65	ENSG00000134690
CDH9	-4.53559	2.64e-08	ENSG00000113100
CDHR5	2.364	1.19e-06	ENSG00000099834
CDK1	4.30709	1.28e-77	ENSG00000170312
CDK5	-1.29056	0.00113407	ENSG00000164885
CDK5R2	-2.30668	0.00103021	ENSG00000171450
CDKN2C	2.19407	1.31e-36	ENSG00000123080
CDKN2D	-1.68724	2.24e-05	ENSG00000129355
CDON	2.61154	4.75e-12	ENSG00000064309
CDRT4	-2.76382	6.09e-05	ENSG00000239704
CDS1	-2.40904	1.02e-07	ENSG00000163624
CDT1	2.39108	5.76e-29	ENSG00000167513
CEBPB-AS1	-1.50139	4.46e-07	ENSG00000277449
CECR1	-1.24873	0.000297668	ENSG00000093072
CELF2-AS1	2.87853	1.53e-09	ENSG00000181800
CELF4	-2.99213	2.77e-06	ENSG00000101489
CELF6	-2.07955	1.61e-05	ENSG00000140488
CELSR1	2.53725	5.88e-08	ENSG00000075275
CEMP1	-2.15087	0.000455436	ENSG00000205923
CENPE	3.96143	6.82e-76	ENSG00000138778
CENPF	6.32641	1.05e-123	ENSG00000117724
CENPH	1.25472	3.8e-06	ENSG00000153044
CENPK	2.52898	3.97e-15	ENSG00000123219
CENPL	1.73032	1.3e-21	ENSG00000120334
CENPM	2.72485	6.03e-42	ENSG00000100162
CENPO	1.14547	5.92e-24	ENSG00000138092
CENPU	2.77395	9.13e-17	ENSG00000151725
CEP135	1.75986	8.86e-42	ENSG00000174799
CEP152	1.81963	8.42e-22	ENSG00000103995
CEP170B	-1.2426	1.53e-06	ENSG00000099814
CEP55	3.7606	4.23e-28	ENSG00000138180
CES4A	-3.94087	5.65e-17	ENSG00000172824
CFAP221	-1.77341	0.000429529	ENSG00000163075
CFAP58	-2.31056	3.67e-05	ENSG00000120051
CFC1	-3.96624	1.35e-06	ENSG00000136698
CFH	-1.65381	0.000610291	ENSG00000000971
CH17-258A22.4	-3.87748	1.11e-07	ENSG00000274615
CH17-340M24.3	-1.53897	1.63e-08	ENSG00000197180
CH17-431G21.1	1.27598	4.99e-07	ENSG00000274487
CH507-145C22.1	2.59659	2.71e-17	ENSG00000278903
CH507-154B10.1	2.44096	5.41e-15	ENSG00000280145
CH507-154B10.2	2.67662	6.06e-08	ENSG00000280018
CH507-338C24.1	4.11293	2.99e-28	ENSG00000277991
CHAF1A	1.39386	6.35e-15	ENSG00000167670
CHD5	-1.81352	0.00895346	ENSG00000116254
CHD7	2.40028	3.24e-29	ENSG00000171316
CHEK1	1.36026	4.75e-24	ENSG00000149554
CHGA	-2.99249	0.00725028	ENSG00000100604
CHGB	-3.26427	5.51e-05	ENSG00000089199
CHIC2	2.20936	2.93e-21	ENSG00000109220
CHIT1	2.55697	4.83e-09	ENSG00000133063
CHML	1.78266	2.37e-24	ENSG00000203668
CHMP4A	-1.45359	2.95e-28	ENSG00000254505
CHN1	-3.05505	8.5e-13	ENSG00000128656
CHORDC1	1.35636	8.07e-06	ENSG00000110172
CHRM4	-2.79675	0.0157611	ENSG00000180720
CHRNA5	1.9612	1.21e-09	ENSG00000169684
CHST11	1.48978	2.36e-13	ENSG00000171310
CHST9	2.98542	1.16e-23	ENSG00000154080
CICP14	1.77255	5.85e-21	ENSG00000281490
CICP27	1.72299	4.44e-10	ENSG00000233750
CISD1	-1.45459	4.01e-12	ENSG00000122873
CISD3	-1.06214	1.51e-14	ENSG00000277972
CKAP2	1.81546	1.46e-20	ENSG00000136108
CKAP2L	5.3103	1.5e-73	ENSG00000169607
CLDN10	-3.15516	2.07e-10	ENSG00000134873
CLDND2	-1.38056	0.0111128	ENSG00000160318
CLEC18A	1.37088	0.000855298	ENSG00000157322
CLEC18C	1.22276	0.00185257	ENSG00000157335
CLEC1A	-1.89216	0.00168989	ENSG00000150048
CLEC3B	-3.23606	5.1e-15	ENSG00000163815
CLEC4G	-4.88387	5.89e-14	ENSG00000182566
CLEC9A	-3.45816	4.82e-06	ENSG00000197992
CLIC5	-2.17274	8.72e-08	ENSG00000112782
CLSPN	3.32836	2.44e-25	ENSG00000092853
CLTB	-1.6265	1.75e-19	ENSG00000175416
CLUL1	-2.43199	0.000109238	ENSG00000079101
CLVS1	-2.5257	3.46e-08	ENSG00000177182
CLYBL	-2.13689	8.3e-22	ENSG00000125246
CMAHP	-3.00146	2.01e-08	ENSG00000168405
CMB9-22P13.1	1.02262	0.00117805	ENSG00000173727
CMC2	-1.45079	3.63e-25	ENSG00000103121
CMTM1	2.22926	1.94e-32	ENSG00000089505
CNGB1	-3.12168	0.0162243	ENSG00000070729
CNNM1	-1.61001	0.0159486	ENSG00000119946
CNTNAP5	2.92455	3.91e-05	ENSG00000155052
COA3	-1.10943	2.58e-12	ENSG00000183978
COL11A1	2.71524	3.33e-31	ENSG00000060718
COL17A1	-2.68143	7.03e-08	ENSG00000065618
COL20A1	4.38458	6.79e-57	ENSG00000101203
COL21A1	-2.19686	2.59e-05	ENSG00000124749
COL22A1	2.3093	0.000257153	ENSG00000169436
COL4A1	2.25637	0.000772936	ENSG00000187498
COL4A2	1.92477	0.0248967	ENSG00000134871
COL4A3	-1.95843	0.0166951	ENSG00000169031
COL5A1	2.23525	2.85e-09	ENSG00000130635
COL5A2	2.52111	1.83e-12	ENSG00000204262
COL6A1	1.55594	3.4e-06	ENSG00000142156
COL6A2	1.96836	3.97e-05	ENSG00000142173
COLCA1	-2.13773	0.000441114	ENSG00000196167
COLCA2	-1.80278	4.22e-06	ENSG00000214290
COPZ2	-2.06705	3.44e-06	ENSG00000005243
CORT	-3.07925	5.83e-05	ENSG00000241563
COX10-AS1	1.61191	5.76e-35	ENSG00000236088
COX14	-1.66535	2.89e-35	ENSG00000178449
COX16	-1.16856	9.46e-19	ENSG00000133983
COX17	-1.21361	1.72e-16	ENSG00000138495
COX4I1	-1.62148	5.87e-27	ENSG00000131143
COX5A	-1.26646	3.53e-10	ENSG00000178741
COX5B	-1.58561	1.43e-13	ENSG00000135940
COX6A1	-1.40857	1.3e-09	ENSG00000111775
COX6A1P2	-2.35967	3.82e-18	ENSG00000226976
COX6C	-1.83575	1.06e-22	ENSG00000164919
COX7A1	-3.28078	2.08e-34	ENSG00000161281
COX7A2	-1.69316	1.55e-21	ENSG00000112695
COX7B	-1.5794	1.64e-21	ENSG00000131174
COX7C	-1.7362	1.93e-23	ENSG00000127184
CPA1	-4.1184	0.000582567	ENSG00000091704
CPA2	-2.7633	0.000142443	ENSG00000158516
CPB1	-3.0978	0.0050565	ENSG00000153002
CPLX2	-4.18975	1.48e-08	ENSG00000145920
CPLX3	-2.694	0.014403	ENSG00000213578
CPNE6	-2.50661	0.000294704	ENSG00000100884
CPQ	-1.26949	2.93e-06	ENSG00000104324
CPXM1	4.51172	1.86e-48	ENSG00000088882
CPXM2	-3.14211	0.00301414	ENSG00000121898
CRB2	1.78746	0.000151723	ENSG00000148204
CREB5	1.67291	2.86e-10	ENSG00000146592
CREG2	-3.30613	6.2e-05	ENSG00000175874
CRHBP	-3.62322	6.99e-07	ENSG00000145708
CRIP2	-1.03956	4.22e-09	ENSG00000182809
CRISPLD2	-2.10006	0.000112791	ENSG00000103196
CROCCP2	1.40834	2.76e-16	ENSG00000215908
CROCCP2	1.28751	3.78e-13	ENSG00000215908
CROCCP2	1.37024	2.63e-16	ENSG00000282056
CROCCP2	1.24941	3.78e-13	ENSG00000282056
CRYBG3	1.90038	7.32e-08	ENSG00000080200
CRYL1	-1.51824	2.9e-10	ENSG00000165475
CRYM	-8.12721	3.41e-25	ENSG00000103316
CSMD2	3.05212	4.66e-42	ENSG00000121904
CSNK2B-LY6G5B-1181	-1.80887	2.75e-05	ENSG00000263020
CSPG4	2.54464	2.22e-21	ENSG00000173546
CSPG4P10	2.52043	1.98e-38	ENSG00000276710
CSPG4P11	3.01401	7.18e-34	ENSG00000259726
CSPG4P12	2.02754	1.08e-16	ENSG00000259295
CSRP1	-1.72624	0.000521669	ENSG00000159176
CTA-14H9.5	-2.72698	1.7e-19	ENSG00000261353
CTA-228A9.3	-1.69099	0.000731645	ENSG00000272720
CTA-941F9.10	2.1022	3.38e-07	ENSG00000280383
CTA-963H5.5	1.2492	0.00100073	ENSG00000250318
CTB-191K22.5	-6.2048	4.72e-14	ENSG00000267815
CTB-31O20.3	-5.417	9.52e-15	ENSG00000267007
CTB-31O20.6	-3.10191	2.2e-12	ENSG00000267125
CTB-43P18.1	-3.52594	6.54e-14	ENSG00000272742
CTB-75G16.3	-2.743	4.33e-10	ENSG00000275720
CTC-203F4.2	-1.95976	0.00598283	ENSG00000270021
CTC-251I16.1	-2.24415	6.71e-05	ENSG00000279496
CTC-260E6.4	2.05704	7.07e-11	ENSG00000280079
CTC-338M12.5	-1.85198	8.71e-05	ENSG00000250222
CTC-429P9.1	-1.74793	1.82e-09	ENSG00000269427
CTC-444N24.6	-1.056	0.0211609	ENSG00000267871
CTC-444N24.7	2.33404	0.000653324	ENSG00000279541
CTC-471F3.5	1.71654	2.54e-13	ENSG00000269069
CTC-510F12.6	-3.27229	1.85e-05	ENSG00000267576
CTC-526N19.1	-1.75278	5.84e-06	ENSG00000277013
CTC-543D15.8	-1.75501	1.34e-06	ENSG00000278611
CTC-575D19.1	-2.99203	0.00032325	ENSG00000233913
CTD-2008E3.1	-1.1442	0.00217263	ENSG00000279923
CTD-2012K14.8	-1.69319	2.9e-12	ENSG00000276075
CTD-2047H16.4	1.27885	2.32e-13	ENSG00000263069
CTD-2049O4.1	-2.47626	0.000188516	ENSG00000261329
CTD-2126E3.4	-2.74143	2.98e-06	ENSG00000267890
CTD-2170G1.2	-3.47388	0.000175226	ENSG00000251575
CTD-2267D19.1	1.65745	2.5e-05	ENSG00000278918
CTD-2287O16.1	-3.041	1.06e-51	ENSG00000185641
CTD-2292M16.8	-1.67145	1.49e-05	ENSG00000258768
CTD-2369P2.12	-6.15538	7.68e-12	ENSG00000267303
CTD-2396E7.10	-5.46356	1.52e-09	ENSG00000268191
CTD-2514K5.4	-7.41589	1.31e-06	ENSG00000264272
CTD-2517O10.6	-1.33862	0.000251336	ENSG00000272323
CTD-2527I21.4	-3.48229	0.00139984	ENSG00000221857
CTD-2531D15.5	-5.1204	2.4e-11	ENSG00000255126
CTD-2540B15.11	-4.85953	2.01e-13	ENSG00000267580
CTD-2540B15.13	-2.46167	0.000711904	ENSG00000273420
CTD-2541J13.1	1.98245	1.92e-15	ENSG00000260578
CTD-2541J13.2	0.607409	0.00252406	ENSG00000263424
CTD-2545M3.8	-2.12329	0.00458458	ENSG00000268518
CTD-2561B21.8	1.87247	0.000274704	ENSG00000280351
CTD-2562J17.6	-2.14689	4.68e-08	ENSG00000279117
CTD-2647L4.4	1.79258	2.11e-09	ENSG00000259366
CTD-3035K23.3	3.15672	1.23e-27	ENSG00000279713
CTD-3131K8.2	1.39563	2.46e-07	ENSG00000269439
CTD-3157E16.2	-1.55123	1.87e-06	ENSG00000276855
CTF1	-1.34218	9.05e-07	ENSG00000150281
CTHRC1	2.27296	2.09e-11	ENSG00000164932
CTRB1	-4.97586	0.0010969	ENSG00000168925
CTXN2	-2.57395	5.51e-08	ENSG00000233932
CXCL11	-7.42653	0.00395494	ENSG00000169248
CXCL14	-4.81694	4.4e-08	ENSG00000145824
CXXC4	1.37105	0.000542465	ENSG00000168772
CYB5B	-1.30058	1.89e-18	ENSG00000103018
CYGB	-2.04362	2.52e-09	ENSG00000161544
CYP11A1	-2.92954	9.68e-15	ENSG00000140459
CYP17A1	-2.09697	1.52e-13	ENSG00000148795
CYP26B1	1.35919	0.00639627	ENSG00000003137
CYP27C1	2.88661	8.14e-15	ENSG00000186684
CYP2B7P	-1.47111	0.00284639	ENSG00000256612
CYP2J2	-1.98415	0.0170159	ENSG00000134716
CYP39A1	1.29562	0.000161999	ENSG00000146233
CYP3A5	1.91	1.13e-06	ENSG00000106258
CYP46A1	-2.67359	2.29e-09	ENSG00000036530
CYP4X1	-2.93737	6.26e-13	ENSG00000186377
CYS1	-1.98664	0.00219168	ENSG00000205795
CYSTM1	-1.60785	7.87e-08	ENSG00000120306
DAD1	-1.06191	5.34e-11	ENSG00000129562
DBNDD2	-2.07485	0.000535294	ENSG00000244274
DCHS1	2.14172	2.96e-36	ENSG00000166341
DCLK2	1.18337	2.77e-05	ENSG00000170390
DCLRE1C	1.33453	3.67e-19	ENSG00000152457
DCN	-2.02471	0.000208116	ENSG00000011465
DCTN1-AS1	-3.11693	5.49e-11	ENSG00000237737
DCX	3.59693	7.84e-27	ENSG00000077279
DCXR	-1.31274	1.32e-12	ENSG00000169738
DDIAS	2.98507	3e-53	ENSG00000165490
DDN	-4.10698	9.47e-07	ENSG00000181418
DDO	-1.45643	0.00107045	ENSG00000203797
DDX12P	2.72718	6.73e-21	ENSG00000214826
DEPDC1	4.83603	2.5e-81	ENSG00000024526
DEPDC1B	2.29863	2.43e-07	ENSG00000035499
DGCR6	-1.27661	3.74e-10	ENSG00000183628
DGKZ	-1.48522	0.00677899	ENSG00000149091
DGKZP1	-1.8169	4.55e-06	ENSG00000179611
DHRS7	-1.03001	9.55e-12	ENSG00000100612
DISP1	1.24525	4.63e-11	ENSG00000154309
DKFZp779M0652	-2.53279	2.18e-09	ENSG00000205106
DKK3	-1.4863	2.2e-09	ENSG00000050165
DLEU2L	1.89589	2.36e-05	ENSG00000116652
DLG2	-2.22062	5.08e-16	ENSG00000150672
DLG4	-1.22854	0.000557671	ENSG00000132535
DLG5	2.21538	1.47e-45	ENSG00000151208
DLGAP2	-3.0668	2.32e-11	ENSG00000198010
DLL3	3.00112	3.18e-22	ENSG00000090932
DLX1	-4.42062	5.33e-11	ENSG00000144355
DLX2	-5.0181	7.62e-07	ENSG00000115844
DMKN	-3.87136	4.45e-09	ENSG00000161249
DMRTC1B	-2.77389	1.61e-12	ENSG00000184911
DMTN	-2.79428	5.39e-14	ENSG00000158856
DNAAF1	-2.72996	7.14e-06	ENSG00000154099
DNAH14	2.25643	3.7e-10	ENSG00000185842
DNAI1	-2.39155	0.00232498	ENSG00000122735
DNAJB1	1.82158	0.00026372	ENSG00000132002
DNAJC12	-1.54116	0.0011851	ENSG00000108176
DNAJC22	1.41003	7.09e-05	ENSG00000178401
DNAL4	-1.08326	5.82e-10	ENSG00000100246
DNASE1	1.05365	3.3e-07	ENSG00000213918
DNASE1L1	-1.46995	5.49e-09	ENSG00000013563
DND1P1	1.91794	0.0153682	ENSG00000264070
DNM1P47	1.94905	5.15e-06	ENSG00000259660
DNM1P51	3.09014	5.89e-35	ENSG00000235370
DNMT1	1.13817	9.92e-19	ENSG00000130816
DNMT3B	1.47112	6.63e-15	ENSG00000088305
DOC2A	-2.3809	4.91e-06	ENSG00000149927
DOCK9-AS2	-2.30513	1.25e-20	ENSG00000260992
DOK2	1.69054	0.00494729	ENSG00000147443
DOT1L	1.33517	1.2e-07	ENSG00000104885
DPCD	-1.14482	2.37e-07	ENSG00000166171
DPY19L2P2	1.40512	5.36e-05	ENSG00000170629
DPYSL3	1.30002	3.23e-09	ENSG00000113657
DRAXIN	3.69046	6.76e-31	ENSG00000162490
DRD1	-4.81574	3.48e-10	ENSG00000184845
DSCAM	2.18137	2.6e-05	ENSG00000171587
DSG2	1.79306	0.00766183	ENSG00000046604
DTL	4.77872	8.55e-97	ENSG00000143476
DTX2P1	1.95802	1.16e-09	ENSG00000186704
DUOX1	1.27652	0.000919057	ENSG00000137857
DUSP18	1.69049	7.94e-16	ENSG00000167065
DUSP26	-1.18729	0.00485347	ENSG00000133878
DUSP8P5	1.71794	3.83e-12	ENSG00000235316
DUX4L50	1.21294	6.37e-06	ENSG00000232815
DUXAP8	2.7125	5.39e-23	ENSG00000206195
DUXAP9	3.24389	2.89e-34	ENSG00000225210
DYDC2	-3.65737	0.00246425	ENSG00000133665
DYNC1I1	-1.75073	0.000164201	ENSG00000158560
DYNLRB2	-2.73613	6.89e-08	ENSG00000168589
DYRK2	1.77901	1.02e-37	ENSG00000127334
DYRK3	2.17768	4e-14	ENSG00000143479
E2F2	4.78443	1.01e-44	ENSG00000007968
E2F7	3.79764	1.59e-26	ENSG00000165891
E2F8	3.80242	2.97e-21	ENSG00000129173
EBI3	-1.65352	0.00032194	ENSG00000105246
ECHS1	-1.72434	1.34e-31	ENSG00000127884
ECSCR	-2.32511	1.39e-05	ENSG00000249751
ECT2	2.01551	2.08e-36	ENSG00000114346
EDN3	-4.20461	0.00533173	ENSG00000124205
EEF1B2	-1.32778	1.63e-15	ENSG00000114942
EEF1B2P3	-1.62335	2.76e-06	ENSG00000232472
EEF1E1	-1.30915	3.44e-12	ENSG00000124802
EEPD1	1.99307	2.75e-18	ENSG00000122547
EFCAB13	1.26717	0.00120304	ENSG00000178852
EFCC1	-1.86202	4.8e-06	ENSG00000114654
EFHD1	-1.84773	0.00122125	ENSG00000115468
EFNA2	3.46504	3.63e-49	ENSG00000099617
EGFEM1P	2.92886	4.07e-12	ENSG00000206120
EGFL7	-1.69333	1.15e-06	ENSG00000172889
EGFR	1.86601	3.09e-06	ENSG00000146648
EGR4	-6.41344	6.78e-13	ENSG00000135625
EIF4E3	-1.35323	1.6e-14	ENSG00000163412
EIF4EBP1	1.40351	0.000452622	ENSG00000187840
EIF4EBP3	-1.69017	4.24e-09	ENSG00000243056
EIF4EP2	-1.66409	1.4e-05	ENSG00000229944
ELFN1	3.3313	7.91e-46	ENSG00000225968
ELL3	-1.72568	3.02e-09	ENSG00000128886
ELN	1.85759	6.2e-06	ENSG00000049540
ELOVL2	-3.79899	1.26e-17	ENSG00000197977
ELOVL7	-2.44745	0.00935664	ENSG00000164181
EMC3-AS1	1.46939	5.28e-20	ENSG00000180385
EMC7	-1.47267	2.65e-24	ENSG00000134153
EME1	2.38276	3.71e-32	ENSG00000154920
EMILIN3	2.89998	3.43e-17	ENSG00000183798
EMX2	-5.86982	2.81e-24	ENSG00000170370
EMX2OS	-5.84916	4.58e-19	ENSG00000229847
ENHO	-2.05344	0.0141201	ENSG00000168913
ENTPD2	-2.70872	1.92e-09	ENSG00000054179
ENTPD3	-2.59121	4.68e-08	ENSG00000168032
EPB41L1	-1.20603	0.000742417	ENSG00000088367
EPCAM	-3.77514	2.9e-11	ENSG00000119888
EPHB1	1.94503	8.87e-05	ENSG00000154928
EPHB2	1.92635	2.93e-19	ENSG00000133216
EPHB3	3.00983	3.37e-63	ENSG00000182580
EPHX1	-1.39017	0.00010559	ENSG00000143819
EPHX2	-1.80137	2.25e-08	ENSG00000120915
ERCC6L	3.30811	7.59e-35	ENSG00000186871
ERG	-1.58172	0.000836899	ENSG00000157554
ERICH6-AS1	-1.66482	1.15e-06	ENSG00000240137
ERVW-1	3.0042	3.69e-05	ENSG00000242950
ESPL1	4.04909	2.3e-54	ENSG00000135476
ETFB	-1.42288	7.45e-13	ENSG00000105379
ETNPPL	-3.61869	4.3e-06	ENSG00000164089
ETV1	2.31608	1.37e-17	ENSG00000006468
ETV7	-3.80197	3.89e-06	ENSG00000010030
EYA2	1.38244	0.000118402	ENSG00000064655
EZH2	2.13254	6.02e-08	ENSG00000106462
F11R	-1.82699	2.45e-08	ENSG00000158769
F2R	3.14981	3.08e-26	ENSG00000181104
FAAH2	-1.52143	5.81e-05	ENSG00000165591
FABP3	-2.27677	2.65e-08	ENSG00000121769
FABP5	-3.81378	4.66e-19	ENSG00000164687
FABP5P7	-5.95139	2.01e-32	ENSG00000234964
FABP6	-2.3107	0.00107423	ENSG00000170231
FAHD2B	-1.92339	4.35e-14	ENSG00000144199
FAHD2CP	-1.60489	0.00471273	ENSG00000231584
FAIM2	-1.22704	0.00476951	ENSG00000135472
FAM107A	-2.21319	4.31e-07	ENSG00000168309
FAM109A	1.04903	3.54e-14	ENSG00000198324
FAM110A	1.41069	2.02e-11	ENSG00000125898
FAM110C	1.25772	0.0119735	ENSG00000184731
FAM132B	2.28748	2.38e-11	ENSG00000178752
FAM135B	1.49305	1.22e-07	ENSG00000147724
FAM153A	-4.86552	5.53e-17	ENSG00000170074
FAM153B	-4.67959	4.14e-13	ENSG00000182230
FAM153C	-5.05094	3.85e-18	ENSG00000204677
FAM162B	1.5535	3.46e-07	ENSG00000183807
FAM171A2	1.59264	3.33e-08	ENSG00000161682
FAM181B	1.34498	1.76e-06	ENSG00000182103
FAM182B	1.43672	9.45e-07	ENSG00000175170
FAM184B	2.48784	1.62e-14	ENSG00000047662
FAM198A	1.91086	9.69e-18	ENSG00000144649
FAM212B	1.55645	3.08e-06	ENSG00000197852
FAM212B-AS1	1.32864	0.0113078	ENSG00000227811
FAM47E-STBD1	1.1402	1.01e-06	ENSG00000118804
FAM50B	-2.4131	1.77e-22	ENSG00000145945
FAM58A	-1.25672	2.67e-09	ENSG00000262919
FAM60A	1.57434	3.07e-10	ENSG00000139146
FAM64A	5.15793	9e-101	ENSG00000129195
FAM65B	-1.84247	6.77e-07	ENSG00000111913
FAM72A	1.28242	3e-07	ENSG00000196550
FAM72B	1.75797	4.53e-13	ENSG00000188610
FAM72C	2.68269	1.1e-18	ENSG00000263513
FAM72D	2.1647	1.29e-18	ENSG00000215784
FAM81A	-1.47331	0.0035906	ENSG00000157470
FAM83D	3.36727	2.64e-43	ENSG00000101447
FAM84B	1.60505	8.16e-08	ENSG00000168672
FAM92B	-4.10426	0.00168573	ENSG00000153789
FAM95B1	1.65975	3.13e-06	ENSG00000274628
FAM95B1	1.8134	5.25e-14	ENSG00000274628
FAM95B1	2.04922	3.13e-06	ENSG00000223839
FAM95B1	2.20287	5.15e-14	ENSG00000223839
FAM96B	-1.29501	9.6e-20	ENSG00000166595
FANCA	1.90522	2.22e-25	ENSG00000187741
FANCC	1.45414	2.57e-07	ENSG00000158169
FANCD2	2.12418	2.08e-38	ENSG00000144554
FANCI	2.71616	7.37e-59	ENSG00000140525
FANK1	-1.98665	0.000117336	ENSG00000203780
FAR2P1	-2.67934	0.0237748	ENSG00000180178
FBN2	4.6056	1.1e-59	ENSG00000138829
FBN3	3.92332	1.54e-30	ENSG00000142449
FBXL14	1.38607	1.85e-08	ENSG00000171823
FBXL15	-1.42766	1.62e-10	ENSG00000107872
FBXL16	-2.55869	0.000517539	ENSG00000127585
FBXL19-AS1	1.34442	2.77e-06	ENSG00000260852
FBXO2	-1.87102	1.16e-06	ENSG00000116661
FBXO44	-1.30971	2.76e-05	ENSG00000132879
FBXO46	1.09948	1.09e-24	ENSG00000177051
FBXO5	1.47125	1.72e-12	ENSG00000112029
FCER1G	-1.78814	0.000294688	ENSG00000158869
FCGBP	3.07999	2.24e-09	ENSG00000275395
FCGR1B	-1.87494	0.000266963	ENSG00000198019
FCGR1C	-2.26506	9.08e-05	ENSG00000265531
FERMT1	3.21419	1.86e-32	ENSG00000101311
FEZF1	-6.73237	5.29e-10	ENSG00000128610
FEZF1-AS1	-6.62258	5.39e-10	ENSG00000230316
FEZF2	-6.48591	7.18e-14	ENSG00000153266
FGD1	1.28593	2.87e-13	ENSG00000102302
FGF1	-2.04329	0.000779388	ENSG00000113578
FGF13	-1.92952	0.00476758	ENSG00000129682
FGF22	-1.4372	2.13e-05	ENSG00000070388
FHDC1	1.3759	8.99e-05	ENSG00000137460
FIBIN	1.08969	0.00224678	ENSG00000176971
FIGF	-2.55815	3.04e-07	ENSG00000165197
FIGN	2.07126	1.46e-27	ENSG00000182263
FIRRE	3.59083	3.59e-23	ENSG00000213468
FIS1	-1.25677	2.27e-08	ENSG00000214253
FJX1	1.84833	1.42e-16	ENSG00000179431
FKBP10	1.58772	1.95e-05	ENSG00000141756
FKBP1A	-1.17206	6.17e-05	ENSG00000088832
FKBP1B	-1.97807	2.22e-08	ENSG00000119782
FKBP3	-1.39613	5.08e-21	ENSG00000100442
FLJ26850	-1.86793	4.88e-06	ENSG00000204666
FLNC	1.70434	0.00162874	ENSG00000128591
FLRT1	1.81871	1.59e-11	ENSG00000126500
FLRT3	1.53623	0.0023071	ENSG00000125848
FNDC3B	1.66528	0.00108811	ENSG00000075420
FNDC9	-3.84743	8.27e-06	ENSG00000172568
FOSL2	1.22014	0.00759826	ENSG00000075426
FOXG1	-6.0124	9.74e-08	ENSG00000176165
FOXK1	1.96351	3.72e-43	ENSG00000164916
FOXM1	4.78685	3.31e-166	ENSG00000111206
FOXO3B	3.15979	2.53e-63	ENSG00000240445
FREM2	3.03276	7.45e-06	ENSG00000150893
FREM3	3.91822	0.000123846	ENSG00000183090
FRMPD3	1.81877	4.45e-10	ENSG00000147234
FRMPD4	-2.31598	0.00415345	ENSG00000169933
FTCD	-2.29179	1.43e-05	ENSG00000160282
FTH1	-1.15986	2.93e-06	ENSG00000167996
FTH1P11	-1.8149	4.73e-08	ENSG00000237264
FTH1P20	-2.08647	0.000235895	ENSG00000226564
FTH1P7	-2.46559	3.61e-11	ENSG00000232187
FTH1P8	-1.75941	1.93e-07	ENSG00000219507
FTL	-1.06667	0.00170425	ENSG00000087086
FTLP3	-1.19653	0.00173448	ENSG00000226608
FUNDC1	-1.50962	8.92e-18	ENSG00000069509
FXYD1	-3.06182	4.84e-16	ENSG00000266964
FXYD2	2.33664	1.23e-06	ENSG00000137731
FXYD3	-1.58343	0.00921312	ENSG00000089356
FZD10-AS1	1.82691	4.55e-05	ENSG00000250208
FZD2	1.93728	1.6e-11	ENSG00000180340
FZD3	1.05297	7.63e-05	ENSG00000104290
GABARAP	-1.12153	4.08e-17	ENSG00000170296
GABARAPL1	-1.63981	2.2e-13	ENSG00000139112
GABARAPL2	-1.37729	2.5e-25	ENSG00000034713
GABRA1	-4.27708	2.54e-05	ENSG00000022355
GABRA4	-3.78353	0.0056506	ENSG00000109158
GABRB2	-3.11248	9.97e-06	ENSG00000145864
GABRG2	-3.76844	8.09e-06	ENSG00000113327
GAD2	-7.86982	3.98e-20	ENSG00000136750
GALNT14	1.4951	1.09e-07	ENSG00000158089
GALNTL5	-5.5411	3.28e-07	ENSG00000106648
GALR1	3.21897	3.2e-26	ENSG00000166573
GAREML	1.16154	0.0093542	ENSG00000157833
GAS1	2.06987	1.15e-14	ENSG00000180447
GAS2L1P2	-2.79212	0.0230649	ENSG00000228376
GAS2L2	-2.15927	0.0119396	ENSG00000270765
GAS2L3	2.29029	9.07e-05	ENSG00000139354
GAS6-AS2	-1.6149	3.97e-14	ENSG00000272695
GATSL2	2.23236	2.48e-16	ENSG00000274070
GCH1	-2.59356	6.25e-07	ENSG00000131979
GCSH	-1.32675	5.96e-05	ENSG00000140905
GCSHP5	-3.09929	4.76e-27	ENSG00000224837
GDA	-3.72565	0.000694293	ENSG00000119125
GFPT2	1.5158	0.00012631	ENSG00000131459
GH1	-11.6077	0.00207053	ENSG00000259384
GHITM	-1.54173	1.32e-12	ENSG00000165678
GIMAP4	-2.07363	2.44e-05	ENSG00000133574
GIMAP5	-2.67323	2.67e-10	ENSG00000196329
GIMAP6	-1.27552	0.00156745	ENSG00000133561
GIMAP7	-2.82156	2.67e-10	ENSG00000179144
GIMAP8	-1.15256	0.0263996	ENSG00000171115
GINS1	1.76388	7.9e-16	ENSG00000101003
GINS3	1.2021	7.75e-07	ENSG00000181938
GIPC2	-1.19421	0.00163005	ENSG00000137960
GJA4	-2.17238	1.57e-06	ENSG00000187513
GJA5	-2.28301	0.00471827	ENSG00000265107
GJB6	-5.70634	2.93e-07	ENSG00000121742
GJC1	2.75497	7.67e-24	ENSG00000182963
GJD2	-2.59263	7.66e-05	ENSG00000159248
GLCCI1	1.69247	7.54e-21	ENSG00000106415
GLI2	2.49688	1.59e-25	ENSG00000074047
GLIS1	2.51678	3.3e-20	ENSG00000174332
GLIS3	2.44591	3.39e-25	ENSG00000107249
GLP1R	2.30665	0.000903672	ENSG00000112164
GLRA2	-4.19286	1.65e-07	ENSG00000101958
GLS2	-3.0278	3.64e-09	ENSG00000135423
GLT8D2	-1.43545	0.00233421	ENSG00000120820
GMFG	-1.53559	0.000553458	ENSG00000130755
GMPR	-1.89546	0.00265187	ENSG00000137198
GNA14	-2.26626	2.37e-06	ENSG00000156049
GNB4	1.58236	2.85e-18	ENSG00000114450
GNG11	-1.43449	0.00694671	ENSG00000127920
GNG12	1.24298	2.36e-12	ENSG00000172380
GNG3	-2.84776	0.00061647	ENSG00000162188
GNG7	-1.84304	0.00406547	ENSG00000176533
GNGT2	-1.52914	0.000196268	ENSG00000167083
GNL3LP1	1.6547	6.05e-14	ENSG00000215032
GNLY	-2.64332	0.00204602	ENSG00000115523
GOLGA2P10	2.04906	7.89e-43	ENSG00000255769
GOLGA2P7	1.89197	3.36e-41	ENSG00000225151
GOLGA7B	-1.5264	0.0246981	ENSG00000155265
GOLT1A	-3.30255	7.03e-12	ENSG00000174567
GOT1	-2.04914	6.85e-12	ENSG00000120053
GOT2	-1.08663	3.18e-13	ENSG00000125166
GP2	-7.94484	5.58e-09	ENSG00000169347
GPC1	1.49308	1.64e-18	ENSG00000063660
GPC2	2.70165	2.76e-38	ENSG00000213420
GPR143	-3.88378	9.25e-28	ENSG00000101850
GPR153	1.865	9.55e-08	ENSG00000158292
GPR156	2.88092	8.22e-30	ENSG00000175697
GPR157	1.33506	0.010334	ENSG00000180758
GPR158-AS1	-1.91442	0.0113105	ENSG00000233642
GPR161	2.07923	3.3e-32	ENSG00000143147
GPR17	2.92995	8.33e-19	ENSG00000144230
GPR173	1.25288	1.87e-08	ENSG00000184194
GPR179	1.66618	0.00319698	ENSG00000277399
GPR4	-1.4442	0.0109683	ENSG00000177464
GPR6	-6.60431	7.93e-09	ENSG00000146360
GPR61	-1.2978	0.00304712	ENSG00000156097
GPR63	1.34123	0.000281503	ENSG00000112218
GPR83	-2.22892	2.33e-06	ENSG00000123901
GPR88	-3.97814	0.0075242	ENSG00000181656
GPRASP1	-1.12602	0.00728203	ENSG00000198932
GPSM1	1.37491	2.44e-09	ENSG00000160360
GPX7	1.2448	5.29e-12	ENSG00000116157
GREM2	-2.44305	6.59e-05	ENSG00000180875
GRIA4	1.84752	2.26e-06	ENSG00000152578
GRID2	2.37717	1.08e-06	ENSG00000152208
GRID2IP	2.24616	7.24e-11	ENSG00000215045
GRIK3	2.09214	2.67e-07	ENSG00000163873
GRIN2D	2.16504	2.85e-14	ENSG00000105464
GRM5-AS1	-6.31231	6.84e-05	ENSG00000255082
GRM6	1.65035	1.71e-07	ENSG00000113262
GRP	-6.24596	3.44e-13	ENSG00000134443
GS1-124K5.4	-1.26583	9.63e-06	ENSG00000237310
GSKIP	-1.57299	6.7e-13	ENSG00000100744
GSTM3	-1.42518	3.14e-07	ENSG00000134202
GSTM5	-4.72256	9.25e-21	ENSG00000134201
GSTO1	-1.8252	7.57e-18	ENSG00000148834
GTSE1	5.24916	1.5e-139	ENSG00000075218
GUCY1B3	-1.77133	1.51e-05	ENSG00000061918
GXYLT1P3	2.91233	7.73e-07	ENSG00000232433
H19	5.03769	2.27e-15	ENSG00000130600
H2AFJ	-1.57739	3.37e-06	ENSG00000246705
H2AFY2	1.19508	2.83e-15	ENSG00000099284
H3F3AP4	1.53686	1.46e-18	ENSG00000235655
HABP4	-1.40411	1.42e-12	ENSG00000130956
HAGH	-1.07438	5.82e-13	ENSG00000063854
HAR1A	-3.18367	3.99e-14	ENSG00000225978
HAR1B	-3.19725	1.56e-12	ENSG00000231133
HAS1	-1.64758	0.000617309	ENSG00000105509
HAS2	3.42499	3.94e-33	ENSG00000170961
HAUS3	1.18023	4.32e-13	ENSG00000214367
HCFC1R1	-1.59866	4.91e-20	ENSG00000103145
HCG11	-2.1988	1.57e-14	ENSG00000228223
HCG25	-2.81304	1.85e-36	ENSG00000232940
HCG4P3	1.40873	9.79e-05	ENSG00000237669
HCST	-2.20985	3.07e-08	ENSG00000126264
HDAC11	-1.61141	3.91e-06	ENSG00000163517
HDDC2	-1.77542	2.94e-18	ENSG00000111906
HDHD3	-1.4337	3.12e-08	ENSG00000119431
HEBP1	-1.07572	3.47e-12	ENSG00000013583
HELB	1.63017	6.94e-12	ENSG00000127311
HELLPAR	2.91416	3.09e-18	ENSG00000281344
HELLS	2.10951	2.62e-24	ENSG00000119969
HEPH	-2.10324	3.59e-08	ENSG00000089472
HEPN1	-2.27491	0.00128932	ENSG00000221932
HERC2P4	2.54215	4.88e-11	ENSG00000230267
HES6	1.9583	9.12e-16	ENSG00000144485
HEY1	1.40263	1.57e-11	ENSG00000164683
HHATL	-3.5438	6.29e-05	ENSG00000010282
HHLA3	-1.24673	4.49e-09	ENSG00000197568
HIGD1A	-2.01804	4.75e-17	ENSG00000181061
HILS1	2.85393	2.42e-12	ENSG00000188662
HINT1	-1.85942	1.38e-31	ENSG00000169567
HINT2	-1.33552	2.84e-07	ENSG00000137133
HIST1H2AG	4.12842	2.15e-11	ENSG00000196787
HIST1H2BN	2.65617	0.0112284	ENSG00000233822
HIST1H4I	2.98713	0.000218015	ENSG00000276180
HIST2H2BD	2.41343	4.15e-05	ENSG00000220323
HIST2H3A	4.04021	2.7e-06	ENSG00000203852
HIST2H3C	4.30174	2.7e-06	ENSG00000203811
HIST3H2A	1.74928	1.39e-07	ENSG00000181218
HIST3H2BB	2.42473	0.00703403	ENSG00000196890
HJURP	5.26387	4.38e-81	ENSG00000123485
HK2	2.04598	7.29e-08	ENSG00000159399
HLF	-1.54421	0.000327242	ENSG00000108924
HMCN2	3.55341	1.44e-24	ENSG00000148357
HMGA2	2.47981	0.00263939	ENSG00000149948
HMGB1P5	-1.57405	1.76e-08	ENSG00000132967
HMGCLL1	-1.87573	0.000542262	ENSG00000146151
HMMR	1.83919	3.72e-05	ENSG00000072571
HMOX2	-1.27485	4.62e-13	ENSG00000103415
HMP19	-2.53582	0.000197293	ENSG00000170091
HMX1	4.64872	1.04e-96	ENSG00000215612
HNRNPCP7	1.47814	9.45e-10	ENSG00000228653
HOOK1	-2.49613	3.99e-05	ENSG00000134709
HOTAIRM1	2.9201	2.69e-07	ENSG00000233429
HOXA-AS2	5.58445	3.38e-07	ENSG00000253552
HOXA2	6.08776	4.21e-07	ENSG00000105996
HOXA3	5.79676	2.88e-09	ENSG00000105997
HOXB2	2.82769	0.00121571	ENSG00000173917
HOXC4	3.44367	6.79e-10	ENSG00000198353
HOXD3	4.79446	2.06e-21	ENSG00000128652
HOXD4	5.12637	0.00216059	ENSG00000170166
HPCA	-4.63084	3.39e-09	ENSG00000121905
HPGD	-2.03195	0.0210543	ENSG00000164120
HPN-AS1	-3.21721	0.000307825	ENSG00000227392
HPRT1	-2.47598	1.22e-19	ENSG00000165704
HRASLS	1.43721	3.77e-05	ENSG00000127252
HRC	-1.69242	3.93e-06	ENSG00000130528
HRCT1	-1.69757	0.0153592	ENSG00000196196
HRH1	2.44837	9.28e-22	ENSG00000196639
HRSP12	-2.1011	5.67e-05	ENSG00000132541
HS3ST1	2.84157	1.62e-47	ENSG00000002587
HS3ST3A1	5.3529	4.24e-29	ENSG00000153976
HS3ST3B1	3.04658	1.07e-11	ENSG00000125430
HS3ST4	-2.50001	9.85e-05	ENSG00000182601
HSBP1L1	-1.16914	1.16e-12	ENSG00000226742
HSD11B1	-3.2687	7.54e-13	ENSG00000117594
HSD17B6	-2.35429	1.18e-05	ENSG00000025423
HSD17B8	-1.16772	0.000612211	ENSG00000204228
HSPA2	-2.53241	0.00656366	ENSG00000126803
HSPA4L	1.22116	0.00386394	ENSG00000164070
HSPB2	-1.23223	0.000651025	ENSG00000170276
HTR1D	-2.86719	0.00720003	ENSG00000179546
HTR1E	-3.96009	5.31e-05	ENSG00000168830
HTR2C	-4.29676	2.28e-05	ENSG00000147246
HTR5A	-3.08757	0.000188496	ENSG00000157219
HTR5A-AS1	-3.88958	1.29e-06	ENSG00000220575
HUNK	2.62129	2.12e-18	ENSG00000142149
HYDIN2	2.01034	7.34e-06	ENSG00000276975
ICAM2	-2.60442	1.62e-08	ENSG00000108622
ICAM5	-3.88976	0.000224052	ENSG00000105376
IDH3A	-1.50251	2.3e-18	ENSG00000166411
IDNK	-1.53582	9.72e-11	ENSG00000148057
IDS	0.0910411	5.04e-06	ENSG00000010404
IDS	-1.64935	4.79e-06	ENSG00000010404
IER5	1.60412	1.38e-08	ENSG00000162783
IFI27	-1.93214	0.0017135	ENSG00000165949
IFI27L2	-1.17989	1.62e-09	ENSG00000119632
IFITM1	-3.6509	2.96e-08	ENSG00000185885
IFITM2	-2.8287	2.84e-11	ENSG00000185201
IFITM3	-2.65168	1.73e-10	ENSG00000142089
IGDCC3	1.35479	8.33e-07	ENSG00000174498
IGDCC4	1.70244	4.43e-11	ENSG00000103742
IGF1	-2.48254	0.0159361	ENSG00000017427
IGF2	3.12402	3.17e-11	ENSG00000167244
IGF2BP2	3.3195	1.96e-30	ENSG00000073792
IGF2BP3	6.88892	6.32e-99	ENSG00000136231
IGFBP2	3.79564	1.76e-35	ENSG00000115457
IGFBP5	2.38828	2.37e-13	ENSG00000115461
IGFBP6	-3.3732	0.000113246	ENSG00000167779
IGFLR1	-1.19741	0.000990264	ENSG00000126246
IGSF3	2.66637	7.47e-39	ENSG00000143061
IGSF9	3.8813	2.24e-55	ENSG00000085552
IGSF9B	3.28806	3.14e-28	ENSG00000080854
IL1R1	-1.84429	0.00606792	ENSG00000115594
IL1RAP	1.42049	0.000220961	ENSG00000196083
IL1RL1	-4.19391	0.000581759	ENSG00000115602
IL1RL2	-1.53124	0.000661867	ENSG00000115598
IL20RA	-1.82712	0.000128773	ENSG00000016402
IL34	-2.49826	1.64e-05	ENSG00000157368
ILDR2	2.6754	6.5e-27	ENSG00000143195
IMPA2	-1.64541	0.00291187	ENSG00000141401
IMPG2	1.52484	0.00255608	ENSG00000081148
INCENP	1.77223	6.43e-15	ENSG00000149503
INE1	1.41191	4.52e-07	ENSG00000224975
INE2	-2.03982	0.0182361	ENSG00000281371
INHBA-AS1	-4.02758	1.61e-08	ENSG00000224116
INO80B-WBP1	-1.40393	0.00258232	ENSG00000274049
INO80C	-1.15934	3.94e-15	ENSG00000153391
INPP5F	-1.68175	1.89e-05	ENSG00000198825
INSRR	2.35966	7.59e-05	ENSG00000027644
IPCEF1	-2.32819	4.01e-07	ENSG00000074706
IPMK	1.03645	1.19e-12	ENSG00000151151
IQCA1	-1.96375	1.52e-06	ENSG00000132321
IQGAP2	2.4937	1.65e-15	ENSG00000145703
IQGAP3	4.2132	3.48e-33	ENSG00000183856
IQSEC3	-3.24714	6.14e-07	ENSG00000120645
IRF2BP2	1.65698	2.66e-37	ENSG00000168264
IRF6	-3.37281	3.55e-12	ENSG00000117595
IRS1	1.92051	4.96e-16	ENSG00000169047
IRS2	1.88038	1.8e-16	ENSG00000185950
IRX1	4.52611	4.56e-41	ENSG00000170549
IRX2	4.12151	4.86e-29	ENSG00000170561
IRX5	2.63853	5.51e-07	ENSG00000176842
ISCU	-1.82308	4.3e-28	ENSG00000136003
ITGA4	2.09458	1.11e-05	ENSG00000115232
ITGA9	1.53065	4.42e-05	ENSG00000144668
ITPKA	-2.41114	0.0101008	ENSG00000137825
ITPRIPL1	2.04638	3.22e-20	ENSG00000198885
JADE3	1.08865	7.34e-06	ENSG00000102221
JAKMIP1	-2.03097	3.21e-06	ENSG00000152969
JAZF1-AS1	-2.67533	1.3e-10	ENSG00000234336
JPH1	-2.20707	0.00252095	ENSG00000104369
JRK	1.44115	1.33e-18	ENSG00000234616
KANSL1L	1.22183	1.91e-17	ENSG00000144445
KAZN	1.1583	8.02e-08	ENSG00000189337
KB-1125A3.11	-1.79203	6.85e-09	ENSG00000272973
KB-1517D11.4	-3.12779	0.000139812	ENSG00000272321
KBTBD12	-2.3685	1.69e-09	ENSG00000187715
KCNA3	2.77652	4.75e-05	ENSG00000177272
KCNAB2	-1.73054	0.0130995	ENSG00000069424
KCND2	2.37202	1.61e-08	ENSG00000184408
KCNG1	2.25897	6.77e-13	ENSG00000026559
KCNIP2	-2.95248	8.13e-08	ENSG00000120049
KCNJ14	1.20618	1.18e-06	ENSG00000182324
KCNJ4	-2.98047	0.00036929	ENSG00000168135
KCNMB4	-1.7501	0.00104519	ENSG00000135643
KCNQ1OT1	2.71216	0.000216304	ENSG00000269821
KCNT2	2.2619	7.89e-28	ENSG00000162687
KCNV1	-4.4657	8.78e-08	ENSG00000164794
KCTD4	-1.92186	0.00827774	ENSG00000180332
KDM4B	1.52499	2.23e-30	ENSG00000127663
KDM5B	1.74909	1.92e-10	ENSG00000117139
KDM7A	1.09218	2.67e-07	ENSG00000006459
KHDRBS3	1.42848	1.83e-12	ENSG00000131773
KIAA0101	2.73127	2.01e-21	ENSG00000166803
KIAA0513	-1.61706	0.000393403	ENSG00000135709
KIAA0922	1.41803	5.77e-12	ENSG00000121210
KIAA1211	2.49833	3.02e-13	ENSG00000109265
KIAA1524	2.03242	1.41e-31	ENSG00000163507
KIAA1549	2.51752	2.54e-27	ENSG00000122778
KIAA1586	1.17749	8.11e-14	ENSG00000168116
KIAA1919	1.73757	4.79e-09	ENSG00000173214
KIAA1958	1.90859	1.68e-22	ENSG00000165185
KIF11	3.49756	8.61e-96	ENSG00000138160
KIF12	-3.22651	4.36e-10	ENSG00000136883
KIF14	5.31148	2.89e-121	ENSG00000118193
KIF15	3.18392	7.51e-61	ENSG00000163808
KIF17	-1.52081	0.00619799	ENSG00000117245
KIF18A	3.33957	1.31e-39	ENSG00000121621
KIF18B	6.0993	9.09e-146	ENSG00000186185
KIF20A	5.08401	3.29e-43	ENSG00000112984
KIF20B	1.98262	3.42e-17	ENSG00000138182
KIF21B	1.4673	0.000898219	ENSG00000116852
KIF23	3.91352	1.31e-71	ENSG00000137807
KIF26A	1.84673	1.08e-16	ENSG00000066735
KIF26B	2.6808	1.79e-21	ENSG00000162849
KIF2C	4.20752	2.29e-128	ENSG00000142945
KIF4A	3.67658	4.11e-50	ENSG00000090889
KIF5A	-2.73996	1.13e-05	ENSG00000155980
KIF7	1.43759	4.15e-12	ENSG00000166813
KIFC1	4.61455	1.46e-79	ENSG00000237649
KIRREL	1.84154	6.92e-05	ENSG00000183853
KIZ	1.26883	4.01e-12	ENSG00000088970
KL	-1.70804	0.000256532	ENSG00000133116
KLF12	1.7837	1.39e-23	ENSG00000118922
KLF4	-1.29581	0.0335199	ENSG00000136826
KLHDC9	-1.41494	1.46e-05	ENSG00000162755
KLHL11	2.77619	4.08e-15	ENSG00000178502
KLHL2	-1.63871	8.45e-09	ENSG00000109466
KLHL25	2.53818	5.23e-30	ENSG00000183655
KLHL3	-1.14244	0.00626082	ENSG00000146021
KLK10	-2.8325	0.000919855	ENSG00000129451
KLK7	-4.12552	0.000939048	ENSG00000169035
KLRC2	2.93162	2.81e-11	ENSG00000205809
KLRC3	2.09082	2.32e-05	ENSG00000205810
KLRK1	2.41175	5.98e-16	ENSG00000213809
KNTC1	2.00925	1.06e-35	ENSG00000184445
KRT1	-5.88858	1.03e-19	ENSG00000167768
KRT13	-8.88706	5.25e-17	ENSG00000171401
KRT19	-3.26752	3.64e-14	ENSG00000171345
KRT2	-5.90793	7.6e-17	ENSG00000172867
KRT222	-4.02845	3.63e-08	ENSG00000213424
KRT4	-8.11106	8.28e-14	ENSG00000170477
KRT8	-2.2199	0.0242149	ENSG00000170421
LA16c-329F2.1	-3.06879	0.00742239	ENSG00000261399
LA16c-390E6.5	-2.95247	4.37e-08	ENSG00000261641
LACC1	-2.2993	6.53e-07	ENSG00000179630
LAMP5	-2.28901	0.00498256	ENSG00000125869
LCMT1	-1.16172	6.46e-18	ENSG00000205629
LCORL	1.20548	4.1e-11	ENSG00000178177
LDHD	-1.74236	3.26e-08	ENSG00000166816
LDLRAD3	1.19017	4.49e-08	ENSG00000179241
LDOC1	-1.08488	0.00146289	ENSG00000182195
LFNG	1.27174	0.00291233	ENSG00000106003
LGI1	-2.68515	4.29e-11	ENSG00000108231
LGI4	-2.31947	0.000129929	ENSG00000153902
LHFPL3	2.35952	4.03e-10	ENSG00000187416
LHPP	-2.06301	0.000231575	ENSG00000107902
LHX6	-3.34972	1.04e-14	ENSG00000106852
LIMD1	1.64842	6.16e-22	ENSG00000144791
LIN28B	2.72117	4.02e-09	ENSG00000187772
LIN7B	-1.94963	2e-16	ENSG00000104863
LIN9	1.51881	2.17e-26	ENSG00000183814
LINC00237	2.23857	7.46e-11	ENSG00000225127
LINC00282	-2.92343	0.00118938	ENSG00000281106
LINC00320	-3.92102	8.36e-05	ENSG00000224924
LINC00463	-3.54262	1.29e-07	ENSG00000234056
LINC00499	-5.27072	1.5e-06	ENSG00000251372
LINC00511	1.73203	2.55e-28	ENSG00000227036
LINC00689	5.92674	6.71e-78	ENSG00000231419
LINC00706	-3.5841	3.92e-09	ENSG00000281186
LINC00839	1.77094	3.57e-08	ENSG00000185904
LINC00886	-1.51599	0.0153744	ENSG00000240875
LINC00891	-2.89037	4.19e-09	ENSG00000281852
LINC00900	-2.30056	1.01e-07	ENSG00000246100
LINC00925	1.93032	4.71e-08	ENSG00000255571
LINC00957	-1.39406	0.00476665	ENSG00000235314
LINC00997	1.27159	9.46e-08	ENSG00000281332
LINC01018	-1.50621	0.0016546	ENSG00000250056
LINC01106	-5.008	6.82e-18	ENSG00000175772
LINC01123	-3.81034	2.96e-07	ENSG00000204588
LINC01126	2.06792	3.64e-14	ENSG00000279873
LINC01140	-1.42431	5.36e-05	ENSG00000267272
LINC01141	1.6169	0.00386186	ENSG00000236963
LINC01166	-3.309	0.000297863	ENSG00000232903
LINC01234	2.22308	1.02e-07	ENSG00000249550
LINC01260	-2.75413	2.49e-12	ENSG00000132832
LINC01296	2.98643	8.06e-22	ENSG00000244306
LINC01299	-4.75071	0.000742082	ENSG00000254081
LINC01480	-2.1618	3.88e-05	ENSG00000270164
LINC01503	-1.8346	0.000472891	ENSG00000233901
LINC01551	-7.47474	1.34e-11	ENSG00000186960
LINC01561	1.5118	0.0231686	ENSG00000177234
LINC01579	2.31963	0.000469306	ENSG00000258754
LL0XNC01-16G2.1	-4.2196	8.37e-05	ENSG00000225110
LLNLF-173C4.2	-2.45375	3.5e-11	ENSG00000282416
LLNLF-187D8.1	-1.93235	0.000590466	ENSG00000277531
LLNLR-259H9.1	-4.03251	8.3e-07	ENSG00000280282
LMNB1	2.55887	4.28e-42	ENSG00000113368
LMNB2	1.27372	1.84e-19	ENSG00000176619
LMO1	2.26214	3.95e-08	ENSG00000166407
LMO3	-1.64747	0.00316143	ENSG00000048540
LOX	1.58587	0.00985119	ENSG00000113083
LOXL2	2.19462	1.9e-20	ENSG00000134013
LOXL3	1.57392	6.08e-22	ENSG00000115318
LPAR6	-1.60501	0.00417081	ENSG00000139679
LPIN3	-2.06832	5.62e-07	ENSG00000132793
LRFN4	1.11371	2.16e-09	ENSG00000173621
LRIG3	1.31347	5.41e-06	ENSG00000139263
LRMP	-1.2783	0.0134361	ENSG00000118308
LRP1	1.78255	1.54e-13	ENSG00000123384
LRP11	-1.50001	4.05e-15	ENSG00000120256
LRP5	1.51989	6.59e-08	ENSG00000162337
LRP6	1.69396	1.93e-21	ENSG00000070018
LRRC10B	-2.55329	0.000107795	ENSG00000204950
LRRC3	1.51117	0.000450184	ENSG00000160233
LRRC32	-2.27657	3.74e-07	ENSG00000137507
LRRC3B	-1.82021	0.00156984	ENSG00000179796
LRRC55	3.12478	1.28e-16	ENSG00000183908
LRRC58	1.10459	1.12e-15	ENSG00000163428
LRRC70	-1.47575	0.00273703	ENSG00000186105
LRRK2	1.49404	1.1e-10	ENSG00000188906
LRRN1	2.35003	2.36e-11	ENSG00000175928
LRRN2	1.5817	5.75e-14	ENSG00000170382
LTF	2.93757	1.26e-06	ENSG00000012223
LUZP2	2.03256	3.55e-05	ENSG00000187398
LY6E	-1.93448	3.06e-05	ENSG00000160932
LY6K	-2.1364	3.61e-08	ENSG00000160886
LY86-AS1	-5.21325	0.00684555	ENSG00000216863
LYPD3	-1.9788	1.86e-06	ENSG00000124466
LYPD6B	-2.63609	0.00776804	ENSG00000150556
LYRM9	-2.07023	1.57e-11	ENSG00000232859
LYSMD2	-1.31434	5.99e-10	ENSG00000140280
LYST	2.01268	7.07e-34	ENSG00000143669
MAD2L1	1.66728	0.000275102	ENSG00000164109
MAFB	2.10387	6.46e-17	ENSG00000204103
MAGED4	2.47967	3.23e-11	ENSG00000154545
MAGEE1	-1.75145	6.63e-06	ENSG00000198934
MAL	-3.7119	1.38e-09	ENSG00000172005
MAL2	-3.28357	1.65e-05	ENSG00000147676
MAML2	2.13775	8.62e-26	ENSG00000184384
MAMLD1	1.14554	1.47e-07	ENSG00000013619
MAN1A1	-1.33192	0.00205134	ENSG00000111885
MAOA	-1.63945	1.59e-06	ENSG00000189221
MAP10	1.60656	8.35e-07	ENSG00000212916
MAP1LC3A	-1.86319	1.22e-16	ENSG00000101460
MAP3K1	1.8241	6.31e-20	ENSG00000095015
MAP3K15	2.03468	0.000127816	ENSG00000180815
MAP3K2	1.11347	8.2e-28	ENSG00000169967
MAP3K5	-1.42104	1.51e-05	ENSG00000197442
MAP7	-1.78358	0.00306469	ENSG00000135525
MAPK3	-1.34644	1.23e-14	ENSG00000102882
MAPT-IT1	2.42309	1.33e-05	ENSG00000279685
2022-03-10	-2.87074	1.92e-06	ENSG00000173838
2022-03-11	-2.60863	0.00107654	ENSG00000183654
MARCKS	1.70871	1.89e-16	ENSG00000277443
MAST3	-1.10697	0.0246679	ENSG00000099308
MATK	-2.47978	3.13e-07	ENSG00000007264
MATN2	1.32035	0.0101659	ENSG00000132561
MB	-3.26073	1.16e-07	ENSG00000198125
MB21D1	1.43703	5.58e-07	ENSG00000164430
MC4R	-3.90157	6.52e-06	ENSG00000166603
MCM10	4.3201	1.58e-41	ENSG00000065328
MCM2	2.52662	3.45e-61	ENSG00000073111
MCM5	1.14686	1.3e-09	ENSG00000100297
MCM8	1.28665	2.66e-08	ENSG00000125885
MCTP1	-1.70076	0.00549926	ENSG00000175471
MDFI	4.03689	3.33e-88	ENSG00000112559
MDGA2	2.89633	1.13e-09	ENSG00000139915
MDH1	-1.71941	2.36e-11	ENSG00000014641
MED13L	1.60143	8.79e-19	ENSG00000123066
MED31	-1.07399	1.04e-12	ENSG00000108590
MEGF11	2.46879	1.68e-16	ENSG00000157890
MEIS1	1.2305	0.0169523	ENSG00000143995
MEIS3P2	1.54018	6.52e-06	ENSG00000188013
MELK	4.56975	3.34e-47	ENSG00000165304
MET	2.80923	0.000106029	ENSG00000105976
Metazoa_SRP	7.09557	4.37e-32	ENSG00000274012
Metazoa_SRP	6.10601	4.37e-32	ENSG00000274012
Metazoa_SRP	6.50789	0.0109305	ENSG00000278771
Metazoa_SRP	5.51833	0.0109305	ENSG00000278771
MEX3A	4.18931	5.5e-141	ENSG00000254726
MEX3B	2.98463	1.8e-57	ENSG00000183496
MEX3D	1.82813	7.73e-33	ENSG00000181588
MFAP2	3.69635	4.5e-17	ENSG00000117122
MFSD4	-1.85903	0.00112671	ENSG00000174514
MFSD7	-1.4151	2.67e-08	ENSG00000169026
MFSD9	1.05821	9.55e-10	ENSG00000135953
MGST1	-2.11768	0.0118377	ENSG00000008394
MGST2	-1.331	9.84e-07	ENSG00000085871
MGST3	-1.13069	6.45e-18	ENSG00000143198
MICA	-1.95204	2.02e-05	ENSG00000204520
MICAL2	-2.56276	1.43e-06	ENSG00000133816
MINOS1	-1.64584	3.4e-36	ENSG00000173436
MIR22HG	-2.33114	4.71e-05	ENSG00000186594
MIR7-3HG	-6.47313	1.87e-16	ENSG00000176840
MIRLET7BHG	2.8221	6.62e-18	ENSG00000197182
MKI67	6.06763	9.04e-47	ENSG00000148773
MKL1	1.06058	2.64e-12	ENSG00000196588
MKRN3	1.8827	6.09e-12	ENSG00000179455
MLXIPL	-2.43694	4.12e-08	ENSG00000009950
MMD	-1.57143	0.0014074	ENSG00000108960
MMP11	1.28115	5.21e-05	ENSG00000099953
MMP14	1.80848	8.79e-09	ENSG00000157227
MMP15	1.75342	2.9e-17	ENSG00000102996
MMP16	4.14147	1.49e-97	ENSG00000156103
MMP9	1.90732	0.00334564	ENSG00000100985
MMS22L	1.12093	5.58e-08	ENSG00000146263
MOAP1	-1.54593	1.54e-09	ENSG00000165943
MORN2	-1.28796	8.67e-11	ENSG00000188010
MOV10L1	-1.15743	0.000337262	ENSG00000073146
MPC1	-1.58298	9.63e-08	ENSG00000060762
MPP7	-2.12028	2.14e-09	ENSG00000150054
MPPED1	-3.82066	1.05e-08	ENSG00000186732
MRAS	-1.21734	1.03e-07	ENSG00000158186
MRC2	1.88258	2.09e-11	ENSG00000011028
MRO	-2.53585	1.97e-05	ENSG00000134042
MROH7	-1.3474	0.000998769	ENSG00000184313
MRPL22	-1.10226	3.33e-16	ENSG00000082515
MRPL41	-1.66402	3.72e-06	ENSG00000182154
MRPS18C	-1.18265	2.75e-19	ENSG00000163319
MRPS36	-1.56158	7.33e-29	ENSG00000134056
MRVI1	-2.13575	1.29e-06	ENSG00000072952
MSH5-SAPCD1	0.0373603	2.79e-05	ENSG00000255152
MSI1	1.63333	9.85e-10	ENSG00000135097
MSRB2	-1.21603	2.61e-13	ENSG00000148450
MSTN	3.09104	4.94e-42	ENSG00000138379
MT-ATP6	-2.53517	7.03e-09	ENSG00000198899
MT-ATP8	-1.86154	0.000606122	ENSG00000228253
MT-CO2	-2.47994	6.77e-09	ENSG00000198712
MT-CO3	-2.32989	9.74e-08	ENSG00000198938
MT-CYB	-2.12134	1.21e-05	ENSG00000198727
MT-ND1	-2.69816	7.72e-10	ENSG00000198888
MT-ND2	-2.83817	9.41e-13	ENSG00000198763
MT-ND3	-2.30511	1.66e-09	ENSG00000198840
MT-ND4	-1.76673	0.0104957	ENSG00000198886
MT-RNR1	-4.13058	8.71e-10	ENSG00000211459
MT-RNR2	-4.63688	6.8e-07	ENSG00000210082
MT1A	-5.0024	3e-15	ENSG00000205362
MT1E	-3.15619	6.87e-14	ENSG00000169715
MT1F	-1.66729	0.00137004	ENSG00000198417
MT1G	-3.85872	1.79e-15	ENSG00000125144
MT1L	-3.58269	3.34e-19	ENSG00000260549
MT1M	-3.18847	1.88e-16	ENSG00000205364
MT1X	-1.90268	0.000325294	ENSG00000187193
MT2A	-2.54362	2.28e-12	ENSG00000125148
MT3	-2.65511	3.92e-08	ENSG00000087250
MTIF3	-1.44181	4.57e-42	ENSG00000122033
MTND2P28	-3.14383	1.4e-11	ENSG00000225630
MTRNR2L8	-4.08683	0.000173157	ENSG00000255823
MTUS1	-1.46489	7.33e-06	ENSG00000129422
MTUS2	-2.21603	9.7e-07	ENSG00000132938
MURC	1.21504	2.33e-07	ENSG00000170681
MUSTN1	-4.02813	2.33e-09	ENSG00000272573
MYBL2	5.30349	2.87e-49	ENSG00000101057
MYBPC1	-2.68344	0.00413921	ENSG00000196091
MYC	2.72694	8.77e-28	ENSG00000136997
MYCL	1.79836	8.58e-15	ENSG00000116990
MYCN	2.03568	4.69e-17	ENSG00000134323
MYEOV2	-1.77316	1.24e-10	ENSG00000172428
MYH6	-3.27819	1.8e-09	ENSG00000197616
MYL12B	-1.50431	1.12e-17	ENSG00000118680
MYL2	-5.98578	2.67e-18	ENSG00000111245
MYL7	-2.14256	1.15e-05	ENSG00000106631
MYL9	-2.19715	0.0237407	ENSG00000101335
MYLK3	-3.08471	0.005118	ENSG00000140795
MYO15A	-2.63928	0.00218624	ENSG00000091536
MYO3A	-3.68384	0.000149618	ENSG00000095777
MYO5B	1.9629	6.77e-05	ENSG00000167306
MYO7B	3.20663	4.37e-14	ENSG00000169994
MYO9B	1.1018	1.77e-07	ENSG00000099331
MYOCD	-3.00157	0.00468398	ENSG00000141052
MYOT	-2.50276	2.37e-08	ENSG00000120729
MYT1	1.96983	2.91e-05	ENSG00000196132
MYT1L	-3.01426	1.56e-06	ENSG00000186487
N4BP2	2.21197	5.34e-25	ENSG00000078177
N6AMT2	-1.12964	1.37e-11	ENSG00000150456
NAA20	-1.11237	8.36e-17	ENSG00000173418
NAGPA	-1.38091	0.000254469	ENSG00000103174
NAP1L2	-1.7619	3.09e-05	ENSG00000186462
NAP1L5	-1.80272	8.6e-05	ENSG00000177432
NAPB	-2.24567	1.29e-05	ENSG00000125814
NAT16	2.64966	3.78e-11	ENSG00000167011
NAV1	1.89499	1.17e-10	ENSG00000134369
NAV2	2.08651	3.47e-23	ENSG00000166833
NAV2-AS1	0.143105	3.16e-05	ENSG00000254894
NBPF19	1.29454	2.42e-08	ENSG00000271383
NBPF26	1.25173	0.000263236	ENSG00000273136
NCAM1-AS1	1.39409	4.41e-05	ENSG00000227487
NCAN	1.98596	0.0095595	ENSG00000130287
NCAPD2	1.5304	3.23e-25	ENSG00000010292
NCAPG	4.43783	2.88e-51	ENSG00000109805
NCAPG2	1.46405	1.83e-18	ENSG00000146918
NCAPH	3.53502	2.11e-65	ENSG00000121152
NCDN	-2.51254	3.9e-05	ENSG00000020129
NCOA7	-1.39014	5.61e-09	ENSG00000111912
NCS1	-1.63677	0.00612937	ENSG00000107130
NDC80	4.55304	5.72e-45	ENSG00000080986
NDNF	3.03436	9.4e-13	ENSG00000173376
NDRG2	-1.88579	0.000703425	ENSG00000165795
NDUFA1	-1.57169	2.31e-15	ENSG00000125356
NDUFA12	-1.32339	2.19e-14	ENSG00000184752
NDUFA2	-1.52222	3.43e-14	ENSG00000131495
NDUFA4	-2.02484	1.13e-17	ENSG00000189043
NDUFA5	-1.75006	6.2e-11	ENSG00000128609
NDUFA8	-1.40183	3.27e-15	ENSG00000119421
NDUFAB1	-1.45705	3.83e-25	ENSG00000004779
NDUFAF3	-1.31323	1.09e-15	ENSG00000178057
NDUFB1	-1.85464	7.01e-38	ENSG00000183648
NDUFB2	-1.32168	5.58e-16	ENSG00000090266
NDUFB3	-1.35377	2.87e-19	ENSG00000119013
NDUFB6	-1.23486	1.23e-15	ENSG00000165264
NDUFB8	-1.57613	2.38e-26	ENSG00000166136
NDUFB9	-1.28861	2.31e-08	ENSG00000147684
NDUFC1	-1.4251	5.18e-23	ENSG00000109390
NDUFS3	-1.19381	4.72e-12	ENSG00000213619
NDUFS4	-1.08969	1.63e-11	ENSG00000164258
NDUFS5	-1.55554	1.91e-23	ENSG00000168653
NDUFV2	-1.06245	5.21e-19	ENSG00000178127
NEBL	-1.30809	6.11e-07	ENSG00000078114
NECAB1	-2.71069	8.97e-10	ENSG00000123119
NECAB2	-2.59232	3e-05	ENSG00000103154
NECAP1	-1.32548	2.43e-08	ENSG00000089818
NEDD4	1.47323	1.34e-15	ENSG00000069869
NEDD8	-1.50415	5.71e-28	ENSG00000129559
NEK2	4.32002	5.32e-50	ENSG00000117650
NES	2.45883	1.8e-28	ENSG00000132688
NEU4	1.41927	0.0050343	ENSG00000204099
NEURL1B	1.22318	0.00377055	ENSG00000214357
NEUROD6	-6.13191	1.58e-05	ENSG00000164600
NFE2L3	1.61959	3.03e-13	ENSG00000050344
NFIA-AS2	2.30193	1.03e-13	ENSG00000237928
NFIB	2.17349	1.27e-38	ENSG00000147862
NGB	-4.45784	7.12e-05	ENSG00000165553
NGFRAP1	-1.3359	2.93e-08	ENSG00000166681
NHLRC4	-2.74909	7.86e-05	ENSG00000257108
NHP2L1	-1.22462	1.39e-18	ENSG00000100138
NHSL2	-1.32698	0.0103508	ENSG00000204131
NID2	1.95316	2.49e-05	ENSG00000087303
NINJ2	-1.96506	0.0144349	ENSG00000171840
NKD1	2.27139	4.76e-13	ENSG00000140807
NKPD1	1.67064	3.57e-06	ENSG00000179846
NKX2-1	-10.8289	1.04e-10	ENSG00000136352
NKX2-2	1.62967	0.0159306	ENSG00000125820
NKX3-1	-1.98577	3.91e-07	ENSG00000167034
NKX6-1	3.66706	8.09e-16	ENSG00000163623
NLGN1	2.10193	6.16e-11	ENSG00000169760
NMB	1.37061	4.11e-05	ENSG00000197696
NME3	-1.11492	2.89e-08	ENSG00000103024
NME5	-2.14805	1.7e-06	ENSG00000112981
NMU	3.27464	1.95e-12	ENSG00000109255
NNMT	2.35895	5.36e-05	ENSG00000166741
NOS3	-2.44346	0.000414646	ENSG00000164867
NOSTRIN	-1.37393	0.00126958	ENSG00000163072
NOTCH1	2.56577	3.6e-53	ENSG00000148400
NOTUM	2.19274	3.18e-11	ENSG00000185269
NOVA1	1.38332	5.43e-17	ENSG00000139910
NOX4	2.34026	8.02e-10	ENSG00000086991
NOXA1	-1.79176	3.51e-10	ENSG00000188747
NPC2	-1.47413	8.87e-06	ENSG00000119655
NPM2	-1.93134	0.000708416	ENSG00000158806
NPNT	-3.58669	7.21e-07	ENSG00000168743
NPTN	-1.75334	3.18e-11	ENSG00000156642
NPW	3.3901	3.07e-17	ENSG00000183971
NPY	-5.4479	1.03e-10	ENSG00000122585
NQO1	-2.57214	1.86e-15	ENSG00000181019
NR0B1	2.00045	3.1e-07	ENSG00000169297
NR2E1	-6.51319	6.29e-14	ENSG00000112333
NR3C2	-2.34165	7.19e-19	ENSG00000151623
NR6A1	1.90944	1.45e-34	ENSG00000148200
NRAP	-2.24717	2e-07	ENSG00000197893
NRARP	2.04763	2.2e-24	ENSG00000198435
NRG4	-2.16648	6.62e-05	ENSG00000169752
NRGN	-5.24148	5.09e-12	ENSG00000154146
NRN1L	-2.06089	6.99e-07	ENSG00000188038
NRP2	1.62661	1.71e-06	ENSG00000118257
NRSN1	-3.17037	3.82e-08	ENSG00000152954
NRSN2	-1.11491	2.4e-07	ENSG00000125841
NSF	-1.35994	0.00220225	ENSG00000073969
NSUN7	1.79597	3.04e-08	ENSG00000179299
NT5DC1	-1.79013	2.68e-07	ENSG00000178425
NTN1	3.0838	1.19e-67	ENSG00000065320
NUDT14	-1.81227	3.97e-23	ENSG00000183828
NUDT7	-1.40827	1.38e-11	ENSG00000140876
NUDT8	-1.14712	5.26e-05	ENSG00000167799
NUF2	3.82334	3.77e-72	ENSG00000143228
NUP210	1.15875	2.84e-18	ENSG00000132182
NUSAP1	3.72617	6.52e-59	ENSG00000137804
NXF2B	-3.54621	4.2e-09	ENSG00000269437
NXPH4	2.41874	0.0111346	ENSG00000182379
NXT2	1.32592	0.0021327	ENSG00000101888
OAF	-1.73935	0.0121347	ENSG00000184232
OAT	-1.42291	1.6e-12	ENSG00000065154
OBSL1	1.19874	2.83e-07	ENSG00000124006
OGDHL	-2.46693	2.99e-06	ENSG00000197444
OLFM3	-3.22861	4.77e-06	ENSG00000118733
OLFML2B	1.54669	0.00123517	ENSG00000162745
OLIG2	2.2134	8.55e-07	ENSG00000205927
OMD	-2.70563	1.85e-05	ENSG00000127083
OPALIN	-6.00689	1.75e-06	ENSG00000197430
OPN4	-5.34341	1.11e-06	ENSG00000122375
OR7E14P	-1.63158	0.0208941	ENSG00000184669
ORC1	2.62723	3.48e-25	ENSG00000085840
OSBPL3	1.1452	3.15e-07	ENSG00000070882
OSCP1	-1.28281	7.63e-11	ENSG00000116885
OSR1	4.25265	3.39e-28	ENSG00000143867
OSTM1-AS1	-6.21313	8.95e-16	ENSG00000225174
OTOF	-3.1083	2.01e-05	ENSG00000115155
OTOS	-3.09492	0.000345247	ENSG00000178602
OTUB2	1.725	3.7e-05	ENSG00000089723
OTX1	-4.23542	1.05e-08	ENSG00000115507
OTX2	-4.73847	0.00141171	ENSG00000165588
P2RY2	-1.7427	0.00365703	ENSG00000175591
P3H4	1.07979	2.2e-08	ENSG00000141696
P4HA1	1.08278	7.37e-05	ENSG00000122884
PABPC1L2B-AS1	-2.27199	2.82e-05	ENSG00000226725
PABPC4L	3.02009	2.99e-29	ENSG00000254535
PABPC5	1.57101	7.15e-14	ENSG00000174740
PACSIN1	-3.31294	0.000141343	ENSG00000124507
PAG1	1.47383	1.28e-08	ENSG00000076641
PAH	-2.46507	4.59e-07	ENSG00000171759
PAIP2B	-2.02006	0.0217579	ENSG00000124374
PAK6	-2.31261	5.48e-05	ENSG00000137843
PALMD	-1.97404	9.28e-05	ENSG00000099260
PAPL	-3.80991	2.77e-05	ENSG00000183760
PAPLN	-2.2309	0.00213466	ENSG00000100767
PAPPA2	2.74153	4.72e-26	ENSG00000116183
PAQR5	-1.33163	0.00300508	ENSG00000137819
PARD6A	-1.3983	1.09e-07	ENSG00000102981
PARD6G	2.3331	1.66e-26	ENSG00000178184
PARM1	-1.7268	0.00517754	ENSG00000169116
PARPBP	1.70705	0.0247721	ENSG00000185480
PARVB	-1.16715	1.09e-05	ENSG00000188677
PAX3	5.59647	3.05e-15	ENSG00000135903
PBK	5.48017	1.14e-45	ENSG00000168078
PBX3	1.52534	2.61e-07	ENSG00000167081
PCBP3-OT1	1.30206	0.0205469	ENSG00000280604
PCDH15	2.14612	0.000124182	ENSG00000150275
PCDH18	1.40081	8.77e-08	ENSG00000189184
PCDHA2	1.68977	3.26e-10	ENSG00000204969
PCDHB10	1.76314	8.09e-28	ENSG00000120324
PCDHB14	1.49422	1.24e-13	ENSG00000120327
PCDHB16	1.53193	4.9e-08	ENSG00000272674
PCDHB17P	2.10746	5.07e-24	ENSG00000255622
PCDHB18P	2.59602	7.86e-26	ENSG00000146001
PCDHB2	2.49235	3.1e-37	ENSG00000112852
PCDHB3	2.84797	6.76e-21	ENSG00000113205
PCDHB5	1.22411	3.55e-07	ENSG00000113209
PCDHB8	2.40957	7.87e-20	ENSG00000120322
PCDHB9	2.36715	1.19e-34	ENSG00000177839
PCDHGA8	3.87911	5.68e-19	ENSG00000253767
PCDHGA9	1.45802	0.00138551	ENSG00000261934
PCDHGB2	2.26732	6.35e-19	ENSG00000253910
PCK1	-3.1557	0.000125822	ENSG00000124253
PCP4	-3.22992	0.0157574	ENSG00000183036
PCP4L1	-3.01542	9.66e-06	ENSG00000248485
PDE1A	-2.368	6.74e-07	ENSG00000115252
PDE1B	-3.34782	1.08e-07	ENSG00000123360
PDE2A	-2.15959	0.000172319	ENSG00000186642
PDGFRA	3.77089	1.2e-37	ENSG00000134853
PDGFRL	-1.9639	1.16e-05	ENSG00000104213
PDK1	1.82807	6.52e-14	ENSG00000152256
PDLIM4	-3.94888	5.43e-16	ENSG00000131435
PDYN	-6.70315	8.21e-10	ENSG00000101327
PDZRN3	1.74261	2.47e-18	ENSG00000121440
PEBP1	-1.64286	1.17e-17	ENSG00000089220
PEBP4	-2.59571	8.7e-07	ENSG00000134020
PEX11G	-1.3676	0.00113704	ENSG00000104883
PFDN5	-1.26148	5.44e-19	ENSG00000123349
PFKFB2	1.3324	1.72e-07	ENSG00000123836
PGAP1	1.35324	1.09e-12	ENSG00000197121
PGC	-5.12552	3.76e-11	ENSG00000096088
PGF	1.15638	0.0245892	ENSG00000119630
PGR	-3.42233	3.8e-13	ENSG00000082175
PHF11	-2.23945	9.58e-18	ENSG00000136147
PHF24	-1.81405	0.0315343	ENSG00000122733
PHLDA1	1.71608	1.66e-14	ENSG00000139289
PHYH	-1.1459	1.49e-10	ENSG00000107537
PHYHD1	-1.38071	0.00143209	ENSG00000175287
PHYHIP	-2.85405	2.77e-08	ENSG00000168490
PIF1	2.49607	3.03e-23	ENSG00000140451
PIGM	1.46768	1.58e-14	ENSG00000143315
PIK3R2	1.16742	9.65e-06	ENSG00000105647
PIP4K2A	-1.51454	0.00256331	ENSG00000150867
PIP5K1B	-2.5562	9e-13	ENSG00000107242
PIPOX	-1.65657	0.00993773	ENSG00000179761
PIR	-2.01744	1.04e-14	ENSG00000087842
PITHD1	-1.3489	4.03e-13	ENSG00000057757
PKD1L2	-2.34251	7.58e-06	ENSG00000166473
PKD1P1	1.57174	0.0152804	ENSG00000244257
PKD1P6	1.35018	9.29e-06	ENSG00000270580
PKD1P6	1.58881	6.64e-11	ENSG00000250251
PKIG	-1.10107	4e-05	ENSG00000168734
PKMYT1	2.37289	1.07e-22	ENSG00000127564
PKNOX2	1.08709	7.93e-05	ENSG00000165495
PLA1A	-5.56932	1.74e-09	ENSG00000144837
PLA2G16	-1.53387	2.23e-06	ENSG00000176485
PLA2G4C	-1.03427	0.00969119	ENSG00000105499
PLAC4	5.03428	7.53e-21	ENSG00000280109
PLAG1	2.24692	2.07e-17	ENSG00000181690
PLEKHA8	1.23284	4.74e-11	ENSG00000106086
PLEKHB1	-1.72595	0.00648481	ENSG00000021300
PLEKHG2	1.29009	3.33e-06	ENSG00000090924
PLEKHG4	2.06476	4.19e-18	ENSG00000196155
PLK1	1.76099	3.48e-23	ENSG00000166851
PLK2	-2.24268	4.45e-05	ENSG00000145632
PLK4	1.86798	6.51e-14	ENSG00000142731
PLK5	-2.91847	1.73e-06	ENSG00000185988
PLOD1	1.42583	3.15e-14	ENSG00000083444
PLOD3	1.2765	7.13e-05	ENSG00000106397
PLXNA1	1.21388	1.34e-09	ENSG00000114554
PNLIP	-7.997	6.98e-06	ENSG00000175535
PNMA5	-4.85702	1.58e-10	ENSG00000198883
PNOC	-3.36929	0.0047905	ENSG00000168081
PNP	-1.78686	0.00559077	ENSG00000198805
PNPLA4	-2.35165	7.35e-13	ENSG00000006757
PNPLA5	-3.57378	3.01e-05	ENSG00000100341
POC1A	1.48492	3.02e-22	ENSG00000164087
POLB	-1.24443	2.98e-07	ENSG00000070501
POLD4	-1.06877	0.00402119	ENSG00000175482
POLH	1.51112	3.43e-21	ENSG00000170734
POLQ	4.01427	3.58e-54	ENSG00000051341
POLR2I	-1.53359	1.05e-09	ENSG00000105258
POLR2J2	1.87834	1.14e-11	ENSG00000228049
POMK	3.17156	1.87e-23	ENSG00000185900
POMP	-1.71086	1.94e-22	ENSG00000132963
PON3	-2.4221	5.31e-06	ENSG00000105852
POSTN	2.71335	5.6e-05	ENSG00000133110
POU2AF1	-2.79077	9.77e-06	ENSG00000110777
POU3F2	1.31524	0.00181673	ENSG00000184486
PPCS	-1.28162	2.38e-24	ENSG00000127125
PPM1H	-1.47271	0.011257	ENSG00000111110
PPP1R14A	-2.65717	2.53e-07	ENSG00000167641
PPP1R14BP3	1.58199	7.23e-11	ENSG00000179967
PPP1R1B	-2.42998	0.0244411	ENSG00000131771
PPP1R36	-1.58502	0.0171986	ENSG00000165807
PPP1R3E	-1.34499	2.06e-06	ENSG00000235194
PPP1R7	-1.24041	3.24e-13	ENSG00000115685
PPP2R2C	-2.1119	2.3e-05	ENSG00000074211
PPP2R3B	1.65364	6.89e-09	ENSG00000167393
PPP4R4	-1.6513	0.00465013	ENSG00000119698
PRB2	-3.77191	0.000650195	ENSG00000121335
PRC1	2.5404	1.38e-47	ENSG00000198901
PRCD	-1.92751	0.000174807	ENSG00000214140
PRDX5	-1.19319	1.27e-11	ENSG00000126432
PRICKLE1	1.40703	0.00117224	ENSG00000139174
PRIM1	1.39367	1.63e-12	ENSG00000198056
PRKAA2	1.26655	1.44e-13	ENSG00000162409
PRKAR2B	-1.56245	2.58e-05	ENSG00000005249
PRKCDBP	-2.15647	0.000688486	ENSG00000170955
PRKCG	-3.40748	0.0004845	ENSG00000126583
PRKCZ	-1.64435	0.000113715	ENSG00000067606
PRKXP1	1.82507	3.55e-05	ENSG00000259205
PRL	-8.75123	0.00114316	ENSG00000172179
PRLHR	-3.08174	0.00947455	ENSG00000119973
PRMT8	-3.4478	2.67e-05	ENSG00000111218
PROCR	-1.60972	0.0184446	ENSG00000101000
PROM1	2.83256	6.61e-30	ENSG00000007062
PROSER2-AS1	-2.41723	2.82e-09	ENSG00000225778
PROX1	2.04809	1.44e-09	ENSG00000117707
PRR11	3.18246	7.56e-37	ENSG00000068489
PRR13	-1.48163	6.97e-24	ENSG00000205352
PRR26	3.03605	4.65e-10	ENSG00000180525
PRR29	-1.98787	0.00365291	ENSG00000224383
PRR5	-1.22298	5.05e-06	ENSG00000186654
PRRT1	-1.49774	0.000193277	ENSG00000204314
PRRX1	1.25687	1.59e-06	ENSG00000116132
PRSS1	-9.01617	5.51e-09	ENSG00000204983
PRSS12	1.6692	0.000139314	ENSG00000164099
PRSS2	-9.41732	5.86e-12	ENSG00000275896
PRSS3	-3.30343	7.27e-10	ENSG00000010438
PRTG	1.36108	0.00394201	ENSG00000166450
PSD	-2.90201	3.86e-09	ENSG00000059915
PSMA3	-1.46121	2.7e-12	ENSG00000100567
PSMA6	-1.04578	7.75e-06	ENSG00000100902
PSMB10	-1.64948	1.11e-12	ENSG00000205220
PSMD6-AS2	2.07751	0.00120569	ENSG00000239653
PSME1	-1.34807	1.9e-09	ENSG00000092010
PSME2	-1.42263	0.00238357	ENSG00000100911
PSME2P2	-2.94208	5.15e-10	ENSG00000225131
PTAR1	1.42045	2.69e-15	ENSG00000188647
PTCH1	1.7341	2.11e-14	ENSG00000185920
PTER	-2.47122	0.0014004	ENSG00000165983
PTGDS	-2.19905	0.000345927	ENSG00000107317
PTGES3L	-1.41277	0.0240974	ENSG00000267060
PTGFRN	2.17759	2.31e-37	ENSG00000134247
PTK7	1.87139	3.48e-11	ENSG00000112655
PTPN5	-2.97624	4.48e-05	ENSG00000110786
PTPRN	-2.15286	0.0173784	ENSG00000054356
PTPRR	-3.83057	3.25e-10	ENSG00000153233
PTPRS	2.15019	1.35e-35	ENSG00000105426
PTPRZ1	2.09463	1.34e-16	ENSG00000106278
PTRHD1	-1.37613	2.13e-06	ENSG00000184924
PTS	-1.41896	1.36e-16	ENSG00000150787
PTTG1	1.87219	3.91e-07	ENSG00000164611
PVRL3	1.59646	1.5e-08	ENSG00000177707
PVT1	3.13145	1.47e-38	ENSG00000249859
PXDN	2.61039	8.69e-43	ENSG00000130508
PXYLP1	1.738	7.97e-28	ENSG00000155893
PYCR1	1.28018	7.62e-05	ENSG00000183010
PYDC1	-5.05641	8.7e-14	ENSG00000169900
PYGO1	1.33607	3.09e-16	ENSG00000171016
PYURF	-1.51913	2.35e-18	ENSG00000145337
PZP	-2.90691	0.000401934	ENSG00000126838
QDPR	-2.46546	0.000124724	ENSG00000151552
RAB11FIP1P1	2.11496	4.19e-09	ENSG00000228492
RAB26	-2.45118	0.000185221	ENSG00000167964
RAB34	-2.77858	3.38e-15	ENSG00000109113
RAB39A	2.70671	1.01e-18	ENSG00000179331
RAB3A	-2.39385	1.3e-05	ENSG00000105649
RAB40B	-2.4036	1.75e-07	ENSG00000141542
RAB4B	-1.36309	1.45e-16	ENSG00000167578
RACGAP1	1.82617	7.77e-30	ENSG00000161800
RAD51	2.81582	8.85e-46	ENSG00000051180
RAD51AP1	2.08457	6.58e-14	ENSG00000111247
RAD54B	1.31938	4.61e-09	ENSG00000197275
RAD54L	1.51473	3.54e-08	ENSG00000085999
RAET1E-AS1	1.90652	0.00761926	ENSG00000268592
RALGPS2	1.28571	4.06e-15	ENSG00000116191
RAMP2-AS1	1.60526	1.04e-14	ENSG00000197291
RANBP17	1.31139	0.00224528	ENSG00000204764
RANBP3L	-1.92792	0.00895857	ENSG00000164188
RAP1GAP	-1.67104	0.00525933	ENSG00000076864
RAPGEF3	-1.72026	0.000200801	ENSG00000079337
RAPGEF4	-2.20523	0.00626116	ENSG00000091428
RAPGEFL1	-1.82881	0.000119915	ENSG00000108352
RARA	1.32019	5.96e-10	ENSG00000131759
RARRES2	-1.96974	2.06e-05	ENSG00000106538
RARRES3	-2.21346	6.31e-08	ENSG00000133321
RASA4	1.07326	4.2e-05	ENSG00000105808
RASAL1	-3.34536	2.37e-11	ENSG00000111344
RASD2	-2.74916	0.000368868	ENSG00000100302
RASGRF2	-1.89112	1.92e-08	ENSG00000113319
RASL11A	-1.67959	1.43e-06	ENSG00000122035
RAVER1	1.46719	2e-28	ENSG00000161847
RBFOX1	-2.5627	0.000308349	ENSG00000078328
RBFOX3	-2.70263	4.75e-05	ENSG00000167281
RBM12B	1.85825	1.85e-32	ENSG00000183808
RBM14-RBM4	1.20021	1.93e-12	ENSG00000248643
RBM15	2.43218	2.26e-16	ENSG00000162775
RBM20	2.74424	1.72e-17	ENSG00000203867
RBP4	-3.09012	1.85e-12	ENSG00000138207
RBP7	-3.63326	6.91e-15	ENSG00000162444
RBX1	-1.54982	1.47e-22	ENSG00000100387
RCAN2	-1.9386	1.36e-07	ENSG00000172348
RCC1	1.38142	3.6e-06	ENSG00000180198
RCC2	1.3854	3.15e-24	ENSG00000179051
RCOR2	2.95781	7.54e-41	ENSG00000167771
RECQL4	1.47473	0.00130494	ENSG00000160957
REEP6	-1.72288	2.95e-05	ENSG00000115255
RERG	-2.19603	2.32e-05	ENSG00000134533
RERGL	-2.50276	1.48e-07	ENSG00000111404
RESP18	-4.4121	3.96e-08	ENSG00000182698
RFX3	1.62196	2.55e-20	ENSG00000080298
RFX3-AS1	1.2276	0.00239015	ENSG00000232104
RGMA	2.04543	1.22e-21	ENSG00000182175
RGMB-AS1	1.92979	2.7e-07	ENSG00000246763
RGN	-1.33587	0.0022211	ENSG00000130988
RGS14	-3.905	1.47e-07	ENSG00000169220
RGS17	1.34011	0.00436656	ENSG00000091844
RGS20	-3.28119	3.28e-09	ENSG00000147509
RGS4	-3.29052	2.46e-09	ENSG00000117152
RGS5	-0.287265	1.32e-07	ENSG00000143248
RGS5	-1.92833	3.37e-06	ENSG00000143248
RGS7	-2.34315	5.66e-06	ENSG00000182901
RHBDL1	-1.90217	0.00793188	ENSG00000103269
RHCG	0.194859	0.0161964	ENSG00000140519
RHOD	-3.83493	2.74e-17	ENSG00000173156
RHOV	-1.56251	0.00472407	ENSG00000104140
RILP	-1.69347	3.7e-24	ENSG00000167705
RIPPLY2	-1.44021	6.6e-05	ENSG00000203877
RLTPR	-3.07421	2.32e-09	ENSG00000159753
RMRP	8.12	6.14e-10	ENSG00000277027
RMRP	7.3841	6.14e-10	ENSG00000277027
RN7SK	7.0797	2.47e-28	ENSG00000202198
RN7SL1	7.28323	9.55e-21	ENSG00000276168
RNA5-8S5	2.44439	0.00686272	ENSG00000278189
RNA5-8S5	2.44439	0.00686272	ENSG00000278189
RNA5-8S5	2.44439	0.00686272	ENSG00000278189
RNA5-8S5	2.44439	0.00686272	ENSG00000278189
RNA5-8S5	2.44439	0.00686272	ENSG00000277739
RNA5-8S5	2.44439	0.00686272	ENSG00000277739
RNA5-8S5	2.44439	0.00686272	ENSG00000277739
RNA5-8S5	2.44439	0.00686272	ENSG00000277739
RNA5-8S5	2.44439	0.00686272	ENSG00000278233
RNA5-8S5	2.44439	0.00686272	ENSG00000278233
RNA5-8S5	2.44439	0.00686272	ENSG00000278233
RNA5-8S5	2.44439	0.00686272	ENSG00000278233
RNA5-8S5	2.44439	0.00686272	ENSG00000275215
RNA5-8S5	2.44439	0.00686272	ENSG00000275215
RNA5-8S5	2.44439	0.00686272	ENSG00000275215
RNA5-8S5	2.44439	0.00686272	ENSG00000275215
RNASE1	-1.7196	0.000919348	ENSG00000129538
RNASEK	-1.55619	3.17e-24	ENSG00000219200
RNF122	1.39782	0.00919805	ENSG00000133874
RNF144A-AS1	-1.74903	0.00230556	ENSG00000228203
RNF165	1.5609	0.000263828	ENSG00000141622
RNF169	1.78107	9.65e-12	ENSG00000166439
RNF181	-1.25358	1.66e-15	ENSG00000168894
RNF182	1.48232	0.00408545	ENSG00000180537
RNF2	1.38926	1.86e-22	ENSG00000121481
RNF208	-1.56738	0.00141825	ENSG00000212864
RNF212	-3.31418	1.49e-16	ENSG00000178222
ROBO1	1.90169	1.88e-17	ENSG00000169855
ROCK1P1	-2.13139	0.00220638	ENSG00000263006
ROGDI	-1.93206	0.000251704	ENSG00000067836
ROR1	1.70693	0.00528108	ENSG00000185483
ROR2	2.14401	5.47e-09	ENSG00000169071
RP1-140K8.5	4.39579	7.37e-36	ENSG00000260604
RP1-168L15.6	-1.32865	0.00826139	ENSG00000280057
RP1-179N16.6	-1.16434	0.0129761	ENSG00000246982
RP1-198K11.5	0.325371	0.00552172	ENSG00000275457
RP1-244F24.1	-1.67674	8.46e-05	ENSG00000271857
RP1-257A7.4	1.3792	3.61e-09	ENSG00000215022
RP1-257A7.5	-3.98157	1.39e-17	ENSG00000272379
RP1-261G23.7	2.0334	0.000566393	ENSG00000272114
RP1-317E23.3	1.39143	3.09e-09	ENSG00000228172
RP1-40E16.9	-2.82207	0.00107482	ENSG00000230269
RP1-79C4.4	3.21286	4.86e-25	ENSG00000271811
RP11-100M12.3	-5.68834	3.82e-11	ENSG00000259168
RP11-1017G21.6	-1.93157	8.33e-13	ENSG00000272444
RP11-1023L17.2	4.6151	1.08e-23	ENSG00000215156
RP11-1026M7.2	-3.87557	8.52e-09	ENSG00000249109
RP11-104H15.10	2.01045	3.23e-05	ENSG00000272884
RP11-106M7.1	-2.85497	5.98e-07	ENSG00000228484
RP11-108M9.4	-1.42616	0.00677589	ENSG00000238142
RP11-1099M24.6	1.3375	1.91e-07	ENSG00000280046
RP11-10N23.2	1.30713	7.25e-09	ENSG00000253854
RP11-1100L3.7	-7.11022	9.36e-40	ENSG00000257663
RP11-1100L3.8	-3.15756	2.77e-05	ENSG00000259884
RP11-1114A5.4	1.69211	5.25e-29	ENSG00000232611
RP11-118K6.3	-1.5684	0.000996231	ENSG00000273001
RP11-121L10.2	2.01323	1.33e-09	ENSG00000280367
RP11-1263C18.1	-3.19563	2.06e-09	ENSG00000273238
RP11-1277A3.2	2.04878	5.5e-09	ENSG00000246596
RP11-127B20.2	-3.10711	1.34e-08	ENSG00000273156
RP11-129M16.4	-1.70724	5.59e-06	ENSG00000277879
RP11-12A20.4	1.85337	5.3e-08	ENSG00000278134
RP11-12A20.7	1.63757	6.61e-05	ENSG00000274911
RP11-1319K7.1	1.42323	4.45e-05	ENSG00000179978
RP11-131L12.4	-1.87591	4.28e-09	ENSG00000275409
RP11-136C24.3	2.03995	2.57e-25	ENSG00000273291
RP11-1406H17.1	-2.4008	6.1e-07	ENSG00000269908
RP11-1415C14.3	2.09883	9.23e-06	ENSG00000253816
RP11-146D12.2	2.49784	6.98e-19	ENSG00000240240
RP11-159D12.5	-1.60862	1.8e-07	ENSG00000266086
RP11-15E1.5	1.45827	0.00652897	ENSG00000274893
RP11-161H23.9	3.01122	1.37e-11	ENSG00000258334
RP11-168O16.1	1.47823	0.00517762	ENSG00000229191
RP11-16P20.4	2.71843	1.4e-29	ENSG00000279302
RP11-173C1.1	-1.69969	1.74e-06	ENSG00000269210
RP11-176H8.1	-0.094706	1.13e-09	ENSG00000203546
RP11-188C12.2	2.40566	4.98e-18	ENSG00000255585
RP11-192H23.6	-3.24072	2.7e-21	ENSG00000265287
RP11-192H23.8	-2.36204	2.72e-09	ENSG00000264608
RP11-196E1.3	-2.179	0.0179778	ENSG00000254561
RP11-196G18.22	1.25212	0.00629302	ENSG00000261716
RP11-196G18.3	1.16737	0.00226852	ENSG00000233030
RP11-19P22.8	-3.97626	1.99e-10	ENSG00000266872
RP11-203B9.4	1.5936	2.61e-08	ENSG00000226803
RP11-209D14.2	-1.19009	0.0209947	ENSG00000261033
RP11-20D14.6	-2.20664	3.46e-05	ENSG00000249790
RP11-20G6.1	-5.10416	0.00303226	ENSG00000280400
RP11-20I23.5	2.08024	1.98e-05	ENSG00000279568
RP11-211G3.2	2.7801	0.011584	ENSG00000223401
RP11-21L23.2	1.71559	0.000129046	ENSG00000261578
RP11-227B21.2	-5.53958	1.17e-15	ENSG00000255686
RP11-22B23.1	1.78369	0.00673996	ENSG00000111788
RP11-231P20.2	-2.1108	1.18e-11	ENSG00000236155
RP11-247C2.2	-2.76927	1.72e-06	ENSG00000248540
RP11-24N18.1	-4.2197	1.42e-17	ENSG00000260570
RP11-262H14.5	2.33259	7.47e-08	ENSG00000229422
RP11-269C23.5	-1.54869	0.00175111	ENSG00000277831
RP11-274B21.12	1.72117	4.39e-13	ENSG00000229413
RP11-274B21.4	1.2936	6.75e-09	ENSG00000230715
RP11-277P12.20	2.1122	2.1e-14	ENSG00000245648
RP11-284F21.10	3.07772	4.01e-29	ENSG00000272405
RP11-284F21.7	3.72594	2.21e-50	ENSG00000229953
RP11-285F16.1	-1.80378	0.00498491	ENSG00000273030
RP11-285F7.2	-1.76347	4.04e-05	ENSG00000242861
RP11-286B14.1	-5.75463	2.59e-05	ENSG00000228971
RP11-288H12.3	1.23393	8.86e-07	ENSG00000213073
RP11-293M10.6	-1.5945	1.87e-05	ENSG00000259319
RP11-295K3.1	1.70217	1.55e-07	ENSG00000250644
RP11-295M3.4	-4.40037	5.08e-05	ENSG00000277639
RP11-298I3.5	-1.95896	0.00699345	ENSG00000259132
RP11-2E11.9	1.74282	0.000418271	ENSG00000270953
RP11-303E16.8	-1.41186	3.39e-12	ENSG00000260643
RP11-315O6.1	-1.96041	0.000266718	ENSG00000255337
RP11-320H14.1	-3.51925	2.49e-05	ENSG00000260878
RP11-324O2.3	-1.66738	2.9e-06	ENSG00000232934
RP11-326G21.1	-2.46243	6.15e-08	ENSG00000272755
RP11-331F4.5	2.59711	8.31e-19	ENSG00000280152
RP11-332M2.1	-1.1481	0.000371337	ENSG00000203644
RP11-333E1.2	-1.43228	5.76e-06	ENSG00000263164
RP11-334C17.3	1.27898	1.47e-08	ENSG00000279259
RP11-343C2.12	-3.04857	3.46e-15	ENSG00000272617
RP11-346C20.3	-2.93389	2.62e-07	ENSG00000271009
RP11-350N15.4	1.56082	0.00448634	ENSG00000255201
RP11-358L22.3	-1.29134	0.00107955	ENSG00000276007
RP11-361L15.3	-3.50747	9.1e-35	ENSG00000280416
RP11-361L15.5	-3.5117	2.24e-09	ENSG00000280334
RP11-366L20.2	2.19156	0.0241145	ENSG00000197301
RP11-374M1.2	1.91264	6.4e-10	ENSG00000231527
RP11-384F7.2	2.32758	0.00263014	ENSG00000239268
RP11-385G16.1	-2.53169	0.000666662	ENSG00000274682
RP11-386G11.10	-2.75261	0.00384076	ENSG00000258017
RP11-392E22.9	-3.61207	0.00245917	ENSG00000273170
RP11-392P7.6	-1.70291	8.11e-07	ENSG00000247498
RP11-394O4.5	-3.02656	0.00220677	ENSG00000269936
RP11-401P9.4	1.28785	1.62e-06	ENSG00000261685
RP11-401P9.5	1.87866	9.84e-12	ENSG00000260249
RP11-407N17.5	-1.32704	0.000155776	ENSG00000258940
RP11-416I2.1	-6.23955	2.99e-13	ENSG00000260328
RP11-417L19.5	2.52992	1.13e-13	ENSG00000279283
RP11-423P10.2	1.57386	0.00021146	ENSG00000272054
RP11-424M24.5	-3.15227	0.000214839	ENSG00000262890
RP11-425L10.1	-1.39889	4.4e-08	ENSG00000244313
RP11-429A20.4	-2.25155	0.0108012	ENSG00000256654
RP11-429B14.4	2.77405	1.45e-18	ENSG00000261478
RP11-429J17.2	1.31301	6.24e-09	ENSG00000181097
RP11-430B1.2	-1.73684	6.24e-08	ENSG00000259577
RP11-434B12.1	-2.57153	4.48e-05	ENSG00000260837
RP11-436D23.1	-2.61493	0.000314332	ENSG00000271860
RP11-436K8.1	3.18589	1.5e-30	ENSG00000231252
RP11-438J1.1	3.84407	1.01e-11	ENSG00000272410
RP11-443B20.1	2.06009	2.25e-36	ENSG00000271936
RP11-44N21.1	-2.7684	1.39e-17	ENSG00000257556
RP11-452L6.5	1.98969	7.82e-21	ENSG00000260267
RP11-456P18.2	1.55032	0.000140779	ENSG00000229808
RP11-45P15.4	-1.6775	2.94e-05	ENSG00000259775
RP11-466H18.1	-3.03567	2.04e-50	ENSG00000244398
RP11-46H11.11	2.14927	1.64e-14	ENSG00000278949
RP11-472B18.1	1.08136	0.000125774	ENSG00000224097
RP11-474D14.2	2.12835	0.0026774	ENSG00000226318
RP11-479O17.9	-2.96721	0.010602	ENSG00000280259
RP11-47A8.5	2.00103	2.51e-09	ENSG00000272933
RP11-480I12.5	2.43275	1.01e-17	ENSG00000214796
RP11-482M8.3	-4.00113	1.51e-10	ENSG00000269935
RP11-490M8.1	-3.07168	1.07e-14	ENSG00000260025
RP11-495P10.10	1.51636	0.00624264	ENSG00000225871
RP11-497E19.1	-2.14604	0.0115459	ENSG00000205562
RP11-4B16.4	2.09828	1.5e-16	ENSG00000278330
RP11-503P10.1	-1.30359	0.00280508	ENSG00000272056
RP11-506F3.1	-3.25225	8.66e-14	ENSG00000282033
RP11-506K6.4	2.74807	9.74e-17	ENSG00000272320
RP11-50D9.3	2.06589	0.000303287	ENSG00000261668
RP11-513I15.6	-3.26626	0.000105683	ENSG00000225339
RP11-521B24.5	-2.43511	6.13e-08	ENSG00000257270
RP11-527D7.1	-2.13403	0.00819254	ENSG00000225554
RP11-536C12.1	1.51634	0.00013853	ENSG00000279254
RP11-536C5.7	2.29573	9.67e-07	ENSG00000227741
RP11-539L10.3	-1.66623	8.86e-05	ENSG00000251580
RP11-54D18.2	-1.47051	0.00390029	ENSG00000215237
RP11-557H15.4	-2.32939	0.000246245	ENSG00000232310
RP11-561C5.4	1.6512	2.62e-10	ENSG00000229212
RP11-566K11.4	-2.93282	0.000149508	ENSG00000259006
RP11-568K15.1	-1.31421	0.00476763	ENSG00000242193
RP11-571L19.8	-1.17406	0.00302983	ENSG00000272777
RP11-572P18.1	-5.67785	5.03e-120	ENSG00000220842
RP11-573G6.6	-2.46597	8.99e-08	ENSG00000261671
RP11-586D19.1	-1.70974	0.00620228	ENSG00000249896
RP11-588H23.3	-1.17848	0.00116058	ENSG00000258168
RP11-589M4.1	-2.67816	1.33e-07	ENSG00000259049
RP11-5C23.1	-1.47366	2.93e-08	ENSG00000272760
RP11-5P18.5	-3.3305	5.15e-07	ENSG00000233078
RP11-605F22.1	-3.4281	3.33e-13	ENSG00000259385
RP11-615I2.2	2.21031	1.86e-09	ENSG00000260577
RP11-617F23.1	-1.43102	0.0295569	ENSG00000259291
RP11-618K13.2	-3.96074	7.28e-05	ENSG00000255498
RP11-638I2.6	-4.31376	2.3e-08	ENSG00000258504
RP11-641D5.1	-0.564086	0.000734276	ENSG00000213178
RP11-660L16.2	-1.12383	0.00834009	ENSG00000254682
RP11-671J11.5	-1.7702	2.18e-10	ENSG00000279423
RP11-680G24.4	1.85543	1.78e-06	ENSG00000261819
RP11-689P11.2	-1.97391	7.48e-05	ENSG00000205959
RP11-68I18.10	1.7792	7.43e-08	ENSG00000261168
RP11-705C15.3	2.10345	5.49e-09	ENSG00000257027
RP11-706O15.1	1.76162	9.18e-08	ENSG00000205664
RP11-70L8.4	1.84867	3.31e-07	ENSG00000265194
RP11-710C12.1	-1.89601	3.71e-05	ENSG00000271474
RP11-722G7.1	1.22491	0.001155	ENSG00000269226
RP11-726G1.1	1.95826	5.3e-09	ENSG00000214776
RP11-728G15.1	-3.1777	6.62e-07	ENSG00000256008
RP11-746M1.1	-4.54507	1.77e-10	ENSG00000263986
RP11-766N7.3	-2.65262	7.6e-05	ENSG00000255693
RP11-776H12.1	2.98841	1.28e-19	ENSG00000226476
RP11-78O7.2	-1.8543	0.000127173	ENSG00000270091
RP11-793H13.8	1.90437	3.35e-16	ENSG00000257379
RP11-797H7.1	2.02714	5.6e-06	ENSG00000234338
RP11-7F17.8	-1.40663	0.000205739	ENSG00000273729
RP11-800A3.4	-2.14002	2.93e-05	ENSG00000260401
RP11-802O23.3	-2.64362	6.97e-08	ENSG00000272182
RP11-805J14.5	-3.89604	9.08e-12	ENSG00000254721
RP11-810M2.2	-2.36134	2.05e-14	ENSG00000263165
RP11-815I9.4	1.9621	3.89e-17	ENSG00000264885
RP11-817I4.2	1.69557	3.65e-15	ENSG00000276115
RP11-81A22.4	-1.11556	6.68e-05	ENSG00000280254
RP11-822E23.6	2.72143	0.000432927	ENSG00000266050
[truncated: 601 more rows]

## Sheet: Table_3_top_20_hits
pert_iname	clinical_phase	moa	target	n (# profiles)	sd (standard deviation of RGES)	sRGES
triptolide	Phase 3	RNA polymerase inhibitor	RELA	89	0.18832	-0.451062
mycophenolic-acid	Launched	dehydrogenase inhibitor|inositol monophosphatase inhibitor	IMPDH1|IMPDH2	35	0.128754	-0.431894
CO-101244	Preclinical	glutamate receptor antagonist	GRIN2B	4	0.256473	-0.429158
mycophenolate-mofetil	Launched	dehydrogenase inhibitor|inositol monophosphatase inhibitor	IMPDH1|IMPDH2	13	0.215431	-0.394943
dabrafenib	Launched	RAF inhibitor	BRAF|LIMK1|NEK11|RAF1|SIK1	12	0.2971	-0.383336
mitomycin-c	Launched	DNA alkylating agent|DNA synthesis inhibitor		25	0.224715	-0.365141
bisindolylmaleimide-ix	Preclinical	PKC inhibitor	AKT1|GSK3B|LCK|MAPK1|MAPK11|MAPK12|MAPK14|MAPK8|PRKCA|ROCK1|RPS6KB1|SIRT1	19	0.198106	-0.363261
daunorubicin	Launched	RNA synthesis inhibitor|topoisomerase inhibitor	TOP2A|TOP2B	107	0.235455	-0.358806
methotrexate	Launched	dihydrofolate reductase inhibitor	DHFR	10	0.18355	-0.346137
clofarabine	Launched	ribonucleotide reductase inhibitor	POLA1|POLD1|POLE|RRM1|RRM2|RRM2B	14	0.142251	-0.344976
ryuvidine	Preclinical	histone lysine methyltransferase inhibitor	CDK2|CDK4	21	0.141682	-0.330173
loteprednol	Launched	glucocorticoid receptor agonist|phospholipase inhibitor	NR3C1	4	0.067021	-0.321421
CD-437	Preclinical	retinoid receptor agonist	RARG	67	0.218232	-0.320072
nateglinide	Launched	insulin secretagogue	ABCC8|KCNJ10|KCNJ11|PPARG	3	0.134719	-0.308341
PIK-75	Preclinical	DNA protein kinase inhibitor|PI3K inhibitor	PIK3CA|PIK3CB|PIK3CD|PIK3CG|PRKDC	65	0.255093	-0.304366
oxiconazole	Launched	bacterial cell wall synthesis inhibitor		5	0.183261	-0.293536
idoxuridine	Launched	DNA directed DNA polymerase inhibitor		3	0.0599458	-0.292769
BVT-948	Preclinical	tyrosine phosphatase inhibitor	PTPN1|PTPN11|PTPN2	10	0.172302	-0.291052
dactinomycin	Launched	RNA polymerase inhibitor	POLR2A	25	0.250673	-0.28691
triamterene	Launched	sodium channel blocker	SCNN1A|SCNN1B|SCNN1D|SCNN1G	7	0.202605	-0.281254

## Sheet: Table_4_gene_reversed
#change of ranks for each disease gene under drug treatment, negative means the high potency to decrease and postive means the high potency to increase expression
Symbol	log2FoldChange	triptolide	mycophenolic.acid	mycophenolate.mofetil	triamterene	relcovaptan	zatebradine	trioxsalen	pathway
KIF20A	0	-70	-87	-96	-93	-4	-58	-84
BIRC5	0	-65	-91	-91	-50	-49	-27	-85
CDC20	0	-89	-90	-90	-91	-78	-91	-75	nuclear division; chromosome segregation; organelle fission; nuclear chromosome segregation; mitotic nuclear division; mitotic sister chromatid segregation; sister chromatid segregation; microtubule cytoskeleton organization involved in mitosis; meiotic nuclear division; regulation of nuclear division; meiotic cell cycle
KIF14	0	-75	-82	-88	-26	-65	-29	-17	nuclear division; chromosome segregation; organelle fission; nuclear chromosome segregation; mitotic nuclear division; mitotic sister chromatid segregation; sister chromatid segregation; regulation of mitotic cell cycle; mitotic cell cycle phase transition
UBE2C	0	-87	-83	-83	-40	-94	-87	-53	nuclear division; chromosome segregation; organelle fission; nuclear chromosome segregation; mitotic nuclear division; mitotic sister chromatid segregation; sister chromatid segregation; regulation of mitotic cell cycle; mitotic cell cycle phase transition; regulation of chromosome segregation; chromosome separation
TOP2A	0	-90	-80	-80	-55	-12	-11	-24	nuclear division; chromosome segregation; organelle fission; nuclear chromosome segregation; sister chromatid segregation; meiotic nuclear division; chromosome separation; meiotic cell cycle
CCNB2	0	-75	-69	-79	-36	-24	-83	-54	nuclear division; organelle fission; mitotic cell cycle phase transition; meiotic nuclear division; meiotic cell cycle
KIF2C	0	-72	-73	-79	-35	-33	-32	-51	nuclear division; chromosome segregation; organelle fission; nuclear chromosome segregation; mitotic nuclear division; mitotic sister chromatid segregation; sister chromatid segregation; regulation of chromosome segregation
BUB1B	0	-33	-81	-78	-82	5	-3	-8	nuclear division; chromosome segregation; organelle fission; nuclear chromosome segregation; mitotic nuclear division; mitotic sister chromatid segregation; sister chromatid segregation; regulation of mitotic cell cycle; mitotic cell cycle phase transition; meiotic nuclear division; regulation of chromosome segregation; regulation of nuclear division; chromosome separation; meiotic cell cycle
MYC	0	-83	-83	-76	6	-32	-66	-1	regulation of mitotic cell cycle; mitotic cell cycle phase transition
SMC4	0	-59	-76	-76	-62	-44	-56	-27	nuclear division; chromosome segregation; organelle fission; nuclear chromosome segregation; mitotic nuclear division; mitotic sister chromatid segregation; sister chromatid segregation; meiotic nuclear division; meiotic cell cycle
MELK	0	-77	-54	-71	-11	-18	-40	-28	mitotic cell cycle phase transition
AURKA	0	-70	-67	-69	-71	-50	-32	-57	nuclear division; organelle fission; mitotic nuclear division; regulation of mitotic cell cycle; mitotic cell cycle phase transition; microtubule cytoskeleton organization involved in mitosis; meiotic nuclear division; regulation of nuclear division; meiotic cell cycle
CENPE	0	-44	-59	-68	-49	4	-37	1	nuclear division; chromosome segregation; organelle fission; nuclear chromosome segregation; mitotic nuclear division; mitotic sister chromatid segregation; sister chromatid segregation; regulation of mitotic cell cycle; mitotic cell cycle phase transition; microtubule cytoskeleton organization involved in mitosis; regulation of chromosome segregation; chromosome separation
E2F2	0	-10	-54	-66	-26	-39	-26	-26
CCNB1	0	-54	-64	-62	-70	-42	-8	9	nuclear division; chromosome segregation; organelle fission; nuclear chromosome segregation; mitotic nuclear division; mitotic sister chromatid segregation; sister chromatid segregation; regulation of mitotic cell cycle; mitotic cell cycle phase transition; microtubule cytoskeleton organization involved in mitosis; regulation of chromosome segregation; regulation of nuclear division; chromosome s…
PLK1	0	-58	-60	-62	-55	-24	-15	-2
AURKB	0	-62	-44	-60	-83	-25	16	-60	nuclear division; chromosome segregation; organelle fission; nuclear chromosome segregation; mitotic nuclear division; mitotic sister chromatid segregation; sister chromatid segregation; regulation of mitotic cell cycle; mitotic cell cycle phase transition; microtubule cytoskeleton organization involved in mitosis; regulation of chromosome segregation; regulation of nuclear division; chromosome s…
DNAJB1	0	-63	-48	-59	-41	-33	-14	15
NUSAP1	0	-25	-60	-59	-70	1	-48	-52	nuclear division; chromosome segregation; organelle fission; nuclear chromosome segregation; mitotic nuclear division; mitotic sister chromatid segregation; sister chromatid segregation; regulation of mitotic cell cycle; microtubule cytoskeleton organization involved in mitosis; regulation of nuclear division
CCNA2	0	-57	-51	-57	-35	-15	-25	1
SOX4	0	-82	-55	-50	-6	-21	-26	-46
GLI2	0	4	-36	-49	-39	5	7	-6
IGF2BP2	0	-46	-54	-49	-55	-66	-3	4
ORC1	0	-17	-6	-46	-72	-6	2	17	regulation of mitotic cell cycle; mitotic cell cycle phase transition
EZH2	0	-57	-34	-43	-36	-38	-45	-43	regulation of mitotic cell cycle; mitotic cell cycle phase transition
MYBL2	0	-39	-41	-43	-90	-45	-5	-15	nuclear division; organelle fission; mitotic nuclear division; microtubule cytoskeleton organization involved in mitosis
CCNF	0	-44	-44	-41	8	-7	-13	18
COL4A1	0	18	-3	-41	-61	15	-10	22
CCND1	0	-30	-62	-36	-10	1	-53	-1
CDCA4	0	-43	-48	-33	-17	-51	47	-21
TRIB3	0	-41	-47	-32	-59	11	9	-1
ETV1	0	-9	-40	-31	-38	-3	7	-67
PLOD3	0	47	-17	-31	-25	8	37	11
PYCR1	0	-7	-31	-30	41	-18	-44	-33
SOX2	0	10	-14	-30	-57	29	30	-10
EIF4EBP1	0	-1	-27	-29	36	-48	-15	-34
NOTCH1	0	-25	-3	-28	-77	4	-4	-73
EPHB2	0	6	-33	-27	24	12	-13	-35
HMGA2	0	-33	-51	-24	-43	4	-16	-24	regulation of mitotic cell cycle; mitotic cell cycle phase transition
EGFR	0	-40	-47	-23	32	-5	-10	-22
DNMT1	0	14	24	-22	-26	60	56	52
CDK1	0	-73	-12	-20	-42	-68	-33	-47	regulation of mitotic cell cycle; mitotic cell cycle phase transition
TMEM97	0	-31	-10	-12	33	-28.5	-13	2
ARL4C	0	1	31	-11	-29	43	34	39
NCAPD2	0	-1	-12	-11	-56	15	41	39
CASK	0	29	-49	-7	5	-27	-37	15
CDC25A	0	-55	-8	-5	-46	-56	-50	-10
DYRK3	0	3	24	3	-56	20	-1	12
MAMLD1	0	7	7	4	32	1	-1	-16
ZMIZ1	0	-30	-30	5	0	29	-24	36
KDM5B	0	-19	-13	6	-39	-24	24	-58
POLR2I	0	52	3	7	72	-16	14	-2
DSG2	0	25	-1	10	-31	4	-19	31
CD40	0	60	55	11	29	75	21	73
CHIC2	0	-54	-23	11	-16	-11	1	-26
VGLL4	0	-16	-8	11	22	45	-4	-3
BRCA1	0	-23	27	12	22	-48	8	4
CISD1	0	61	53	12	22	41	53	10	cellular respiration; energy derivation by oxidation of organic compounds; generation of precursor metabolites and energy
CHEK1	0	4	1	15	17	-15	40	-8
BCL7B	0	-23	8	20	72	3	-16	-25
GPC1	0	43	8	20	-47	17	-3	20
POLB	0	47	39	21	17	8	29	7
TGFB3	0	56	45	21	15	37	55	-33
TRAM2	0	-18	13	28	5	57	36	51
CHMP4A	0	27	24	29	64	-11	-12	1
BACE2	0	45	14	32	41	5	31	8
CD44	0	26	26	34	3	42	5	46
SNCA	0	77	58	36	18	91	88	7	oxidative phosphorylation; aerobic respiration; ATP synthesis coupled electron transport; mitochondrial ATP synthesis coupled electron transport; cellular respiration; respiratory electron transport chain; aerobic electron transport chain; energy derivation by oxidation of organic compounds; ATP metabolic process; electron transport chain; generation of precursor metabolites and energy; mitochond…
CHN1	0	78	49	37	25	67	61	97
HPRT1	0	53	29	42	86	3	74	20
PSME1	0	69	27	42	49	-22	-20	-16
TIMELESS	0	0	20	43	23	39	33	34
CALM3	0	71	55	44	19	46	30	83
RAP1GAP	0	19	17	44	79	6	-6	-8
PSME2	0	72	57	46	19	-3	-6	7
MAP7	0	36	34	47	57	46	26	66
DHRS7	0	9	30	49	55	1	-38	32
POLD4	0	27	61	50	63	-12	4	-15
PKIG	0	28	25	51	38	-12	58	23
ANXA7	0	20	48	55	37	-7.5	-19	44
PNP	0	18	78	56	22	-3	19	33
HEBP1	0	17	50	57	30	23	-7	34
TCEAL4	0	40	69	58	37	-9	-1	-21
NOS3	0	63	40	59	74	47	16	52
SKP1	0	52	71	60	21	-8	-15	31
CLTB	0	52	66	62	4	26	1	-17
FIS1	0	50	60	62	65	-16	-4	6	ATP metabolic process
SPAG7	0	3	58	62	59	31	29	-19
TRAPPC6A	0	67	28	62	66	17	-11	45
SNAP25	0	76	63	65	50	57	94	95
PSMB10	0	76	74	66	46	11	-4	49
ATP6V1D	0	12	53	69	31	13	-16	-2
SLC25A4	0	38	69	69	52	47	25	5	generation of precursor metabolites and energy
ETFB	0	71	68	70	54	22	25	-22	cellular respiration; respiratory electron transport chain; energy derivation by oxidation of organic compounds; electron transport chain; generation of precursor metabolites and energy
PAK6	0	53	53	71	79	71	-3	57
CSRP1	0	20	66	78	19	31	12	-4
S100A13	0	97	91	80	69	19	14	50
CCDC85B	0	20	72	82	80	3	16	-6
ALDOC	0	89	87	84	21	-4	57	9	ATP metabolic process; generation of precursor metabolites and energy
MYL9	0	87	87	84	20	-6	84	42
SFN	0	30	100	99	69	78	39	28
