# Supplementary material for: Reversal of cancer gene expression identifies repurposed drugs for diffuse intrinsic pontine glioma
Source: Acta Neuropathol Commun. 2022 Oct 23;10:150. doi: 10.1186/s40478-022-01463-z (PMC9590174; doi:10.1186/s40478-022-01463-z)
Supplement: Supplementary file 3 — Additional file 3: Table S3. Meta-signature derived from the two bulk RNAseq datasets. [file 40478_2022_1463_MOESM3_ESM.xlsx]

## Sheet: Table_2_meta_dz_signature
GeneSymbol	Value (log2 fold change)	padj	identifier
ABALON	1.90186	1.15e-08	ENSG00000281376
ABCA1	1.55081	2.58e-06	ENSG00000165029
ABCA9	-2.46361	0.00307492	ENSG00000154258
ABCB4	3.17677	1.39e-41	ENSG00000005471
ABCC1	1.34608	1e-09	ENSG00000103222
ABCC2	1.2838	3.57e-05	ENSG00000023839
ABHD11	-1.28744	3.17e-09	ENSG00000106077
ABHD14A	-1.28725	0.000372769	ENSG00000248487
ABHD8	-1.19004	0.00122571	ENSG00000127220
ABLIM2	-1.59777	2.94e-06	ENSG00000163995
AC000403.4	-2.16692	0.00198678	ENSG00000278727
AC002310.14	1.11086	1.24e-10	ENSG00000278922
AC004057.1	-3.82314	2.93e-14	ENSG00000196656
AC004076.5	1.59971	1.39e-12	ENSG00000276449
AC004540.4	2.07231	4.98e-08	ENSG00000225792
AC004540.5	1.58292	0.000300217	ENSG00000214870
AC004603.4	-3.54743	0.000446071	ENSG00000225877
AC004623.3	1.4739	0.00396229	ENSG00000279488
AC004951.6	2.92712	5.86e-17	ENSG00000228434
AC005062.2	-1.45708	5.49e-10	ENSG00000243004
AC005330.2	-1.9866	4.52e-06	ENSG00000267372
AC005481.5	3.68985	7.58e-18	ENSG00000222012
AC005754.8	1.92959	3.47e-05	ENSG00000272108
AC005943.2	3.75227	1.28e-07	ENSG00000267059
AC006946.15	-2.65923	8.01e-10	ENSG00000235478
AC006946.16	1.25822	3.93e-09	ENSG00000273203
AC007163.3	-3.42257	4.44e-08	ENSG00000237166
AC007191.4	2.15328	1.64e-29	ENSG00000279407
AC007192.6	-6.1058	6.58e-17	ENSG00000269145
AC007292.3	2.26536	1.17e-06	ENSG00000269318
AC007405.6	-1.62155	0.0131817	ENSG00000239467
AC007620.3	1.88994	5.48e-11	ENSG00000242539
AC009237.8	2.22271	4.56e-17	ENSG00000229689
AC010649.1	-6.85827	5.68e-13	ENSG00000267448
AC011330.13	-1.93796	2.26e-15	ENSG00000275601
AC011516.2	-5.67551	1.15e-10	ENSG00000268038
AC012314.8	1.43042	5.11e-05	ENSG00000237017
AC012354.6	-6.44405	3.07e-08	ENSG00000225156
AC018647.3	-3.16684	2.69e-05	ENSG00000227544
AC063976.7	3.51245	1.53e-21	ENSG00000224431
AC068831.15	-5.96681	9.73e-15	ENSG00000259661
AC069282.6	-0.0347044	0.000152072	ENSG00000225507
AC084219.3	1.88867	0.000302824	ENSG00000267163
AC108142.1	1.89207	0.0184615	ENSG00000177822
AC110615.1	-5.76858	0.00993487	ENSG00000279909
AC113188.2	-4.722	4e-20	ENSG00000279535
AC131097.4	-3.19695	1.1e-10	ENSG00000216921
AC139100.4	1.48107	0.00303712	ENSG00000278000
AC141928.1	-1.80772	0.00165788	ENSG00000250986
AC145676.2	2.98402	1.05e-11	ENSG00000249852
ACAA2	-1.39855	2.97e-07	ENSG00000167315
ACADSB	-1.47267	9.99e-10	ENSG00000196177
ACAN	4.97229	8.91e-80	ENSG00000157766
ACSBG1	-2.05595	0.00814355	ENSG00000103740
ACSL5	-2.23558	4.72e-05	ENSG00000197142
ACTR10	-1.34589	7.19e-25	ENSG00000131966
ACTR3B	-1.75176	4.49e-07	ENSG00000133627
ACVR1C	-2.09129	5.49e-06	ENSG00000123612
ACVR2B	1.65312	5.48e-17	ENSG00000114739
ACYP1	-1.20527	1.14e-09	ENSG00000119640
ADAMTS12	2.51284	4.27e-11	ENSG00000151388
ADAMTS15	3.1561	3.26e-25	ENSG00000166106
ADAMTS17	1.45282	0.000109647	ENSG00000140470
ADAMTS3	1.48059	0.00790027	ENSG00000156140
ADAMTS6	1.70576	3.77e-07	ENSG00000049192
ADAMTS7	2.18577	5.85e-17	ENSG00000136378
ADAMTS7P1	-1.82507	0.0110907	ENSG00000274376
ADAMTSL5	-3.12595	5.4e-08	ENSG00000185761
ADAP1	-1.96627	1.15e-05	ENSG00000105963
ADAT3	1.24284	4.34e-07	ENSG00000213638
ADGRL3	1.57838	2.02e-08	ENSG00000150471
ADH1B	-4.8011	0.00464152	ENSG00000196616
ADIRF	-2.19582	2.59e-05	ENSG00000148671
ADORA2A-AS1	1.55191	0.0141508	ENSG00000178803
ADPGK-AS1	-0.187115	0.00734607	ENSG00000260898
ADRA2C	-1.90727	0.0217798	ENSG00000184160
AF127577.10	-5.80994	0.0201899	ENSG00000229047
AF131215.2	1.66169	8.06e-25	ENSG00000255310
AF131216.5	-2.56993	4.39e-06	ENSG00000255020
AFAP1	1.65248	7.45e-26	ENSG00000196526
AFAP1L2	1.59115	1.39e-11	ENSG00000169129
AGPAT4-IT1	2.40454	1.59e-13	ENSG00000279355
AGRN	2.04853	1.01e-42	ENSG00000188157
AHR	1.82946	4.11e-06	ENSG00000106546
AHRR	1.37497	0.00474916	ENSG00000063438
AIF1	-1.75738	0.0223986	ENSG00000204472
AIFM3	-2.12908	0.00412288	ENSG00000183773
AK5	-3.52374	1.02e-14	ENSG00000154027
AK7	-3.04466	2.48e-06	ENSG00000140057
AKTIP	-1.53668	5.36e-22	ENSG00000166971
AL589743.1	2.78889	9.22e-15	ENSG00000279508
ALB	-3.02963	9.47e-06	ENSG00000163631
ALDH1A1	-3.4414	2.76e-07	ENSG00000165092
ALDH1L2	1.29929	2.71e-07	ENSG00000136010
ALDH2	-1.86732	1.15e-09	ENSG00000111275
ALDOC	-1.72308	0.00979543	ENSG00000109107
ALG10B	1.31357	1.54e-11	ENSG00000175548
ALK	2.52978	3.1e-17	ENSG00000171094
AMACR	-1.30202	0.000101465	ENSG00000242110
AMER1	1.3675	2.7e-10	ENSG00000184675
AMH	2.52152	7.27e-15	ENSG00000104899
AMN1	-1.75423	1.51e-11	ENSG00000151743
AMOTL2	1.2784	1.93e-06	ENSG00000114019
AMY2A	-3.88659	1.51e-12	ENSG00000243480
ANAPC15	-1.94838	5.28e-30	ENSG00000110200
ANGPTL2	2.49002	1.24e-28	ENSG00000136859
ANKFN1	1.92835	0.000153505	ENSG00000153930
ANKK1	-3.16662	2.16e-16	ENSG00000170209
ANKRD10-IT1	-0.107831	1.26e-09	ENSG00000229152
ANKRD19P	-2.17503	0.000381088	ENSG00000187984
ANKRD20A1	3.1351	1.05e-23	ENSG00000260691
ANKRD20A2	3.73638	1.33e-20	ENSG00000183148
ANKRD20A3	3.14278	8.14e-08	ENSG00000276203
ANKRD20A4	2.60754	1.17e-08	ENSG00000172014
ANKRD24	-1.78088	0.00646343	ENSG00000089847
ANKRD29	-1.42597	3.04e-06	ENSG00000154065
ANKRD30BL	-0.070347	0.0235135	ENSG00000163046
ANKRD34B	-4.57119	2.85e-06	ENSG00000189127
ANKRD50	1.56594	1.05e-09	ENSG00000151458
ANKRD65	-1.45646	0.00167242	ENSG00000235098
ANO3	-3.24904	0.00788521	ENSG00000134343
ANOS1	2.42357	8.77e-18	ENSG00000011201
ANXA2P2	-1.82915	0.0010122	ENSG00000231991
ANXA3	-3.00406	5.19e-07	ENSG00000138772
ANXA7	-1.44773	1.39e-27	ENSG00000138279
AP000439.1	-2.41256	0.0136652	ENSG00000255980
AP000648.5	1.9254	2.22e-12	ENSG00000280385
AP001189.4	-2.33252	9.8e-05	ENSG00000236304
AP003419.11	-6.92225	8.71e-19	ENSG00000256514
AP3S1	-1.43609	1.23e-15	ENSG00000177879
APC2	1.68555	2.13e-07	ENSG00000115266
APCDD1	1.42279	0.000136444	ENSG00000154856
APOD	-2.0692	2.05e-07	ENSG00000189058
APOL1	-2.34357	0.00999843	ENSG00000100342
APOL3	-1.97633	4.25e-05	ENSG00000128284
APOO	-1.35075	7.24e-13	ENSG00000184831
AR	1.99764	1.55e-05	ENSG00000169083
ARAP1-AS2	1.90955	1e-22	ENSG00000245148
ARHGAP11A	2.58377	5.72e-31	ENSG00000198826
ARHGAP11B	2.4447	7.44e-33	ENSG00000187951
ARHGAP19-SLIT1	3.10915	1.55e-07	ENSG00000269891
ARHGAP44	-1.45405	0.0132653	ENSG00000006740
ARHGDIG	-2.15018	1.21e-05	ENSG00000242173
ARHGEF15	-1.42649	0.0125952	ENSG00000198844
ARL10	1.38319	8.54e-16	ENSG00000175414
ARL2	-1.39062	2.15e-14	ENSG00000213465
ARL4C	1.43786	6.36e-09	ENSG00000188042
ARPC5L	-1.26769	1.23e-11	ENSG00000136950
ARPP21	-2.63589	0.0155488	ENSG00000172995
ARRB1	-1.41358	0.000810063	ENSG00000137486
ARSI	-2.65171	0.000422769	ENSG00000183876
ARSJ	1.76836	9.38e-08	ENSG00000180801
ARX	-6.22265	1.49e-12	ENSG00000004848
ASCL1	2.53692	6.09e-24	ENSG00000139352
ASCL5	2.66585	2.1e-32	ENSG00000232237
ASF1B	2.99217	1.14e-21	ENSG00000105011
ASIC4	2.319	3.55e-13	ENSG00000072182
ASPA	-2.76108	3.34e-05	ENSG00000108381
ASPDH	-2.91712	3.51e-19	ENSG00000204653
ASPHD1	-2.86111	2.59e-08	ENSG00000174939
ASPM	6.39052	9.59e-120	ENSG00000066279
ASRGL1	-1.81436	7.7e-09	ENSG00000162174
ASTN2	1.57175	4.61e-11	ENSG00000148219
ATAD2	1.22743	1.72e-08	ENSG00000156802
ATAD5	2.04332	3.58e-23	ENSG00000176208
ATF7IP	1.56747	1.27e-19	ENSG00000171681
ATL1	-1.54505	1.68e-06	ENSG00000198513
ATOH7	-1.89586	0.00296383	ENSG00000179774
ATOX1	-1.40162	5.18e-07	ENSG00000177556
ATP1A4	2.20192	4.61e-13	ENSG00000132681
ATP5E	-1.02722	9.74e-14	ENSG00000124172
ATP5G1	-1.52331	2.69e-29	ENSG00000159199
ATP5G3	-1.21321	2.22e-22	ENSG00000154518
ATP5H	-1.35492	5.41e-34	ENSG00000167863
ATP5I	-1.32229	6.49e-13	ENSG00000169020
ATP5J	-1.26994	5.9e-21	ENSG00000154723
ATP5J2-PTCD1	1.26865	4.17e-07	ENSG00000248919
ATP5L	-1.11713	3.01e-20	ENSG00000167283
ATP6V0C	-1.21018	4.45e-10	ENSG00000185883
ATP6V1D	-1.32768	2.34e-16	ENSG00000100554
ATP6V1E1	-1.73526	5.53e-29	ENSG00000131100
ATP6V1G2	-2.36397	2.93e-05	ENSG00000213760
ATP6V1H	-1.61215	3.75e-14	ENSG00000047249
ATPAF1	-1.38402	1.55e-13	ENSG00000123472
AURKA	2.4574	6.33e-38	ENSG00000087586
AURKB	3.68094	2.12e-13	ENSG00000178999
AVPI1	-1.31158	4.34e-06	ENSG00000119986
B3GALT4	-1.0909	2.12e-06	ENSG00000235863
B3GNT7	1.82214	3.15e-06	ENSG00000156966
BACE2	1.14378	0.0100717	ENSG00000182240
BACH2	2.24671	2.73e-35	ENSG00000112182
BAHD1	1.25285	1.86e-26	ENSG00000140320
BANK1	-2.16137	1.15e-06	ENSG00000153064
BARD1	1.77113	2.31e-22	ENSG00000138376
BCAN	3.4065	5.99e-30	ENSG00000132692
BCAT1	1.60741	3.99e-07	ENSG00000060982
BCHE	2.94751	2.07e-46	ENSG00000114200
BCL7B	-1.27783	5.65e-16	ENSG00000106635
BCORL1	1.37737	2.14e-10	ENSG00000085185
BDH2	-1.69325	2.7e-07	ENSG00000164039
BEAN1	1.67921	1.04e-05	ENSG00000166546
BEND4	3.71483	3.35e-35	ENSG00000188848
BEND7	1.17478	3.02e-10	ENSG00000165626
BEX1	-2.2677	7.03e-13	ENSG00000133169
BEX2	-2.41303	7.33e-20	ENSG00000133134
BEX4	-1.50522	1.35e-10	ENSG00000102409
BEX5	-3.18435	3.23e-15	ENSG00000184515
BFSP1	-1.61752	7.51e-07	ENSG00000125864
BHLHE22	-5.18918	3.57e-12	ENSG00000180828
BHMT2	-2.88691	1.75e-18	ENSG00000132840
BICD1	1.75167	2.89e-18	ENSG00000151746
BIRC5	4.92492	2.52e-87	ENSG00000089685
BIVM-ERCC5	3.43078	0.00093595	ENSG00000270181
BLM	1.72133	1.71e-13	ENSG00000197299
BLOC1S2	-1.68663	1e-26	ENSG00000196072
BLOC1S5-TXNDC5	-3.86551	1.63e-21	ENSG00000259040
BLVRB	-1.19756	7e-06	ENSG00000090013
BMF	1.94533	7.6e-15	ENSG00000104081
BMP2	2.01182	1.48e-07	ENSG00000125845
BMP8B	1.4727	1.37e-06	ENSG00000116985
BMPER	2.30212	2.1e-14	ENSG00000164619
BNIPL	2.3799	6.53e-16	ENSG00000163141
BOLA3	-1.54571	7.93e-20	ENSG00000163170
BRCA1	1.51605	7.08e-14	ENSG00000012048
BRCA2	2.50792	1.15e-08	ENSG00000139618
BRIP1	3.33534	2.46e-39	ENSG00000136492
BSCL2	-2.54482	1.32e-16	ENSG00000168000
BSPRY	-3.97486	2.14e-10	ENSG00000119411
BTBD16	-3.10994	9.88e-07	ENSG00000138152
BTBD17	3.02921	1.71e-22	ENSG00000204347
BTN2A3P	1.83095	0.00135944	ENSG00000124549
BUB1	4.78488	4.77e-90	ENSG00000169679
BUB1B	4.78488	9.06e-80	ENSG00000156970
C10orf142	-2.53902	1.86e-09	ENSG00000277288
C10orf35	-1.71628	3.5e-09	ENSG00000171224
C11orf1	-1.42437	1.33e-16	ENSG00000137720
C11orf84	1.15073	2.66e-08	ENSG00000168005
C11orf88	-3.98103	0.00439938	ENSG00000183644
C11orf98	-1.16602	1.2e-10	ENSG00000278615
C14orf1	-1.32578	2.53e-20	ENSG00000133935
C14orf2	-2.12911	5.96e-37	ENSG00000156411
C15orf65	-1.268	2.14e-05	ENSG00000261652
C16orf86	-1.3205	0.000940224	ENSG00000159761
C16orf89	-1.69369	0.00189088	ENSG00000153446
C17orf53	2.32934	1.62e-36	ENSG00000125319
C18orf32	-1.44671	6.89e-14	ENSG00000177576
C18orf54	1.54051	3.72e-11	ENSG00000166845
C19orf57	1.99496	5.13e-39	ENSG00000132016
C1orf106	2.96148	3.23e-34	ENSG00000163362
C1orf112	1.0084	3.58e-07	ENSG00000000460
C1orf115	-2.44445	8.6e-10	ENSG00000162817
C1orf162	-1.51274	0.000422689	ENSG00000143110
C1orf220	1.82128	4.51e-16	ENSG00000213057
C1orf226	2.88713	2.51e-66	ENSG00000239887
C1orf54	-1.76984	9.81e-10	ENSG00000118292
C1orf87	-4.53378	6e-08	ENSG00000162598
C1orf94	1.94435	1.35e-07	ENSG00000142698
C1QL1	3.99136	4.77e-88	ENSG00000131094
C1QL4	3.76184	4.88e-21	ENSG00000186897
C20orf195	1.52121	0.000317469	ENSG00000125531
C2orf27A	1.68906	4.45e-23	ENSG00000197927
C2orf44	1.17022	1.64e-19	ENSG00000163026
C2orf74	-2.05751	1.13e-23	ENSG00000237651
C3orf14	-1.63075	1.83e-09	ENSG00000114405
C3orf67	1.72826	1.34e-06	ENSG00000163689
C4B	1.62663	7.69e-07	ENSG00000224389
C4orf50	-2.64795	0.000202724	ENSG00000181215
C5orf38	1.99779	0.00669781	ENSG00000186493
C5orf64	-2.42622	0.0106876	ENSG00000178722
C6orf136	-1.35782	9.84e-16	ENSG00000204564
C7orf55	-1.10326	1.93e-07	ENSG00000164898
C9orf116	-1.59023	0.00780237	ENSG00000160345
C9orf135	-6.24364	1.29e-09	ENSG00000204711
C9orf24	-3.67918	5.91e-17	ENSG00000164972
CA11	-3.45339	5.15e-14	ENSG00000063180
CA3	2.06894	4.77e-11	ENSG00000164879
CA4	-2.92428	6.44e-05	ENSG00000167434
CA7	-4.10663	3.34e-06	ENSG00000168748
CAB39L	-1.11844	0.000274202	ENSG00000102547
CABIN1	1.19935	4.7e-26	ENSG00000099991
CABP1	-2.98293	7.63e-06	ENSG00000157782
CACNA1F	-2.55487	5.1e-11	ENSG00000102001
CACNA1I	-1.80818	0.0319203	ENSG00000100346
CACNA2D3	-1.70064	0.000256739	ENSG00000157445
CACNG3	-6.18384	8.51e-14	ENSG00000006116
CACNG4	1.71698	0.00350456	ENSG00000075461
CACTIN-AS1	1.47257	0.000623522	ENSG00000226800
CALCRL	1.94603	1.84e-18	ENSG00000064989
CALM1	-1.68335	3.1e-14	ENSG00000198668
CALM2	-1.77372	2.24e-20	ENSG00000143933
CALM3	-1.5533	3.1e-08	ENSG00000160014
CALY	-3.78417	4.55e-09	ENSG00000130643
CAMK1	-1.53284	1.56e-09	ENSG00000134072
CAMK1G	-4.56118	4.33e-15	ENSG00000008118
CAMK2A	-4.81501	4.7e-07	ENSG00000070808
CAMK2B	-2.26006	5.97e-07	ENSG00000058404
CAPN3	-2.49284	6.11e-05	ENSG00000092529
CAPN5	1.58076	8.83e-23	ENSG00000149260
CAPNS1	-1.14902	1.05e-12	ENSG00000126247
CARTPT	-5.54071	0.000320873	ENSG00000164326
CASC15	2.45282	2.41e-39	ENSG00000272168
CASC5	5.42963	5.67e-81	ENSG00000137812
CASK	1.50922	9.66e-14	ENSG00000147044
CASZ1	2.28073	2.69e-14	ENSG00000130940
CATSPER2	-1.21399	8.23e-06	ENSG00000166762
CBLN3	-1.89295	0.000149414	ENSG00000139899
CBLN4	-3.16009	0.0017742	ENSG00000054803
CBX2	4.73988	7.5e-169	ENSG00000173894
CBX4	1.18978	1.46e-06	ENSG00000141582
CBX5	1.51545	7.6e-19	ENSG00000094916
CBX7	-1.64297	6.11e-09	ENSG00000100307
CBX8	2.32141	9.66e-62	ENSG00000141570
CCBE1	-3.20373	5.73e-05	ENSG00000183287
CCDC108	-2.62575	0.0128105	ENSG00000181378
CCDC114	-4.18214	1.09e-05	ENSG00000105479
CCDC142	1.60625	1.44e-27	ENSG00000135637
CCDC150	1.47793	7.33e-07	ENSG00000144395
CCDC153	-2.21505	0.00274669	ENSG00000248712
CCDC169	1.09529	0.00190827	ENSG00000242715
CCDC176	-1.58127	5.52e-10	ENSG00000119636
CCDC18	1.66864	1.3e-18	ENSG00000122483
CCDC23	-1.21849	6.61e-19	ENSG00000177868
CCDC28A	-1.81292	3.1e-15	ENSG00000024862
CCDC53	-1.07266	6.38e-12	ENSG00000120860
CCDC64	-2.33076	1.85e-06	ENSG00000135127
CCDC68	-2.12338	0.000317167	ENSG00000166510
CCDC69	-1.40471	6.52e-06	ENSG00000198624
CCDC8	-2.61439	2.16e-07	ENSG00000169515
CCDC80	1.79041	7.63e-06	ENSG00000091986
CCDC85B	-1.64682	7.53e-05	ENSG00000175602
CCER2	1.27779	1.18e-07	ENSG00000262484
CCK	-6.91304	1.75e-18	ENSG00000187094
CCKBR	-2.97132	0.00208683	ENSG00000110148
CCL19	-5.69634	1.51e-08	ENSG00000172724
CCL3	-3.23563	0.00852814	ENSG00000277632
CCL4	-3.44098	3.93e-05	ENSG00000275302
CCL4L2	-3.41272	0.00247057	ENSG00000276070
CCM2L	-1.2663	0.000323063	ENSG00000101331
CCNA2	1.65586	2.98e-06	ENSG00000145386
CCNB1	2.1223	2.73e-26	ENSG00000134057
CCNB2	3.97574	1.04e-83	ENSG00000157456
CCND1	1.86626	4.49e-16	ENSG00000110092
CCND2	2.83853	6.9e-24	ENSG00000118971
CCNF	1.497	4.76e-13	ENSG00000162063
CCNI2	-2.0505	5.9e-14	ENSG00000205089
CCNO	-5.66623	1.19e-17	ENSG00000152669
CD101	2.62665	9.93e-26	ENSG00000134256
CD276	1.77632	1.16e-22	ENSG00000103855
CD40	-1.68701	5.93e-05	ENSG00000101017
CD44	1.3671	0.00544651	ENSG00000026508
CD59	-1.67485	7.82e-13	ENSG00000085063
CDA	-1.81281	2.82e-05	ENSG00000158825
CDC20	4.25627	6.18e-59	ENSG00000117399
CDC25A	1.85756	5.54e-13	ENSG00000164045
CDC6	1.36977	0.00106483	ENSG00000094804
CDCA2	4.31076	4.15e-68	ENSG00000184661
CDCA4	1.37972	1.3e-19	ENSG00000170779
CDCA5	3.06284	2.43e-60	ENSG00000146670
CDCA7	2.68957	9.62e-28	ENSG00000144354
CDCA7L	1.77861	6.01e-16	ENSG00000164649
CDCA8	2.95554	5.08e-65	ENSG00000134690
CDH9	-4.53559	2.64e-08	ENSG00000113100
CDHR5	2.364	1.19e-06	ENSG00000099834
CDK1	4.30709	1.28e-77	ENSG00000170312
CDK5	-1.29056	0.00113407	ENSG00000164885
CDK5R2	-2.30668	0.00103021	ENSG00000171450
CDKN2C	2.19407	1.31e-36	ENSG00000123080
CDKN2D	-1.68724	2.24e-05	ENSG00000129355
CDON	2.61154	4.75e-12	ENSG00000064309
CDRT4	-2.76382	6.09e-05	ENSG00000239704
CDS1	-2.40904	1.02e-07	ENSG00000163624
CDT1	2.39108	5.76e-29	ENSG00000167513
CEBPB-AS1	-1.50139	4.46e-07	ENSG00000277449
CECR1	-1.24873	0.000297668	ENSG00000093072
CELF2-AS1	2.87853	1.53e-09	ENSG00000181800
CELF4	-2.99213	2.77e-06	ENSG00000101489
CELF6	-2.07955	1.61e-05	ENSG00000140488
CELSR1	2.53725	5.88e-08	ENSG00000075275
CEMP1	-2.15087	0.000455436	ENSG00000205923
CENPE	3.96143	6.82e-76	ENSG00000138778
CENPF	6.32641	1.05e-123	ENSG00000117724
CENPH	1.25472	3.8e-06	ENSG00000153044
CENPK	2.52898	3.97e-15	ENSG00000123219
CENPL	1.73032	1.3e-21	ENSG00000120334
CENPM	2.72485	6.03e-42	ENSG00000100162
CENPO	1.14547	5.92e-24	ENSG00000138092
CENPU	2.77395	9.13e-17	ENSG00000151725
CEP135	1.75986	8.86e-42	ENSG00000174799
CEP152	1.81963	8.42e-22	ENSG00000103995
CEP170B	-1.2426	1.53e-06	ENSG00000099814
CEP55	3.7606	4.23e-28	ENSG00000138180
CES4A	-3.94087	5.65e-17	ENSG00000172824
CFAP221	-1.77341	0.000429529	ENSG00000163075
CFAP58	-2.31056	3.67e-05	ENSG00000120051
CFC1	-3.96624	1.35e-06	ENSG00000136698
CFH	-1.65381	0.000610291	ENSG00000000971
CH17-258A22.4	-3.87748	1.11e-07	ENSG00000274615
CH17-340M24.3	-1.53897	1.63e-08	ENSG00000197180
CH17-431G21.1	1.27598	4.99e-07	ENSG00000274487
CH507-145C22.1	2.59659	2.71e-17	ENSG00000278903
CH507-154B10.1	2.44096	5.41e-15	ENSG00000280145
CH507-154B10.2	2.67662	6.06e-08	ENSG00000280018
CH507-338C24.1	4.11293	2.99e-28	ENSG00000277991
CHAF1A	1.39386	6.35e-15	ENSG00000167670
CHD5	-1.81352	0.00895346	ENSG00000116254
CHD7	2.40028	3.24e-29	ENSG00000171316
CHEK1	1.36026	4.75e-24	ENSG00000149554
CHGA	-2.99249	0.00725028	ENSG00000100604
CHGB	-3.26427	5.51e-05	ENSG00000089199
CHIC2	2.20936	2.93e-21	ENSG00000109220
CHIT1	2.55697	4.83e-09	ENSG00000133063
CHML	1.78266	2.37e-24	ENSG00000203668
CHMP4A	-1.45359	2.95e-28	ENSG00000254505
CHN1	-3.05505	8.5e-13	ENSG00000128656
CHORDC1	1.35636	8.07e-06	ENSG00000110172
CHRM4	-2.79675	0.0157611	ENSG00000180720
CHRNA5	1.9612	1.21e-09	ENSG00000169684
CHST11	1.48978	2.36e-13	ENSG00000171310
CHST9	2.98542	1.16e-23	ENSG00000154080
CICP14	1.77255	5.85e-21	ENSG00000281490
CICP27	1.72299	4.44e-10	ENSG00000233750
CISD1	-1.45459	4.01e-12	ENSG00000122873
CISD3	-1.06214	1.51e-14	ENSG00000277972
CKAP2	1.81546	1.46e-20	ENSG00000136108
CKAP2L	5.3103	1.5e-73	ENSG00000169607
CLDN10	-3.15516	2.07e-10	ENSG00000134873
CLDND2	-1.38056	0.0111128	ENSG00000160318
CLEC18A	1.37088	0.000855298	ENSG00000157322
CLEC18C	1.22276	0.00185257	ENSG00000157335
CLEC1A	-1.89216	0.00168989	ENSG00000150048
CLEC3B	-3.23606	5.1e-15	ENSG00000163815
CLEC4G	-4.88387	5.89e-14	ENSG00000182566
CLEC9A	-3.45816	4.82e-06	ENSG00000197992
CLIC5	-2.17274	8.72e-08	ENSG00000112782
CLSPN	3.32836	2.44e-25	ENSG00000092853
CLTB	-1.6265	1.75e-19	ENSG00000175416
CLUL1	-2.43199	0.000109238	ENSG00000079101
CLVS1	-2.5257	3.46e-08	ENSG00000177182
CLYBL	-2.13689	8.3e-22	ENSG00000125246
CMAHP	-3.00146	2.01e-08	ENSG00000168405
CMB9-22P13.1	1.02262	0.00117805	ENSG00000173727
CMC2	-1.45079	3.63e-25	ENSG00000103121
CMTM1	2.22926	1.94e-32	ENSG00000089505
CNGB1	-3.12168	0.0162243	ENSG00000070729
CNNM1	-1.61001	0.0159486	ENSG00000119946
CNTNAP5	2.92455	3.91e-05	ENSG00000155052
COA3	-1.10943	2.58e-12	ENSG00000183978
COL11A1	2.71524	3.33e-31	ENSG00000060718
COL17A1	-2.68143	7.03e-08	ENSG00000065618
COL20A1	4.38458	6.79e-57	ENSG00000101203
COL21A1	-2.19686	2.59e-05	ENSG00000124749
COL22A1	2.3093	0.000257153	ENSG00000169436
COL4A1	2.25637	0.000772936	ENSG00000187498
COL4A2	1.92477	0.0248967	ENSG00000134871
COL4A3	-1.95843	0.0166951	ENSG00000169031
COL5A1	2.23525	2.85e-09	ENSG00000130635
COL5A2	2.52111	1.83e-12	ENSG00000204262
COL6A1	1.55594	3.4e-06	ENSG00000142156
COL6A2	1.96836	3.97e-05	ENSG00000142173
COLCA1	-2.13773	0.000441114	ENSG00000196167
COLCA2	-1.80278	4.22e-06	ENSG00000214290
COPZ2	-2.06705	3.44e-06	ENSG00000005243
CORT	-3.07925	5.83e-05	ENSG00000241563
COX10-AS1	1.61191	5.76e-35	ENSG00000236088
COX14	-1.66535	2.89e-35	ENSG00000178449
COX16	-1.16856	9.46e-19	ENSG00000133983
COX17	-1.21361	1.72e-16	ENSG00000138495
COX4I1	-1.62148	5.87e-27	ENSG00000131143
COX5A	-1.26646	3.53e-10	ENSG00000178741
COX5B	-1.58561	1.43e-13	ENSG00000135940
COX6A1	-1.40857	1.3e-09	ENSG00000111775
COX6A1P2	-2.35967	3.82e-18	ENSG00000226976
COX6C	-1.83575	1.06e-22	ENSG00000164919
COX7A1	-3.28078	2.08e-34	ENSG00000161281
COX7A2	-1.69316	1.55e-21	ENSG00000112695
COX7B	-1.5794	1.64e-21	ENSG00000131174
COX7C	-1.7362	1.93e-23	ENSG00000127184
CPA1	-4.1184	0.000582567	ENSG00000091704
CPA2	-2.7633	0.000142443	ENSG00000158516
CPB1	-3.0978	0.0050565	ENSG00000153002
CPLX2	-4.18975	1.48e-08	ENSG00000145920
CPLX3	-2.694	0.014403	ENSG00000213578
CPNE6	-2.50661	0.000294704	ENSG00000100884
CPQ	-1.26949	2.93e-06	ENSG00000104324
CPXM1	4.51172	1.86e-48	ENSG00000088882
CPXM2	-3.14211	0.00301414	ENSG00000121898
CRB2	1.78746	0.000151723	ENSG00000148204
CREB5	1.67291	2.86e-10	ENSG00000146592
CREG2	-3.30613	6.2e-05	ENSG00000175874
CRHBP	-3.62322	6.99e-07	ENSG00000145708
CRIP2	-1.03956	4.22e-09	ENSG00000182809
CRISPLD2	-2.10006	0.000112791	ENSG00000103196
CROCCP2	1.40834	2.76e-16	ENSG00000215908
CROCCP2	1.28751	3.78e-13	ENSG00000215908
CROCCP2	1.37024	2.63e-16	ENSG00000282056
CROCCP2	1.24941	3.78e-13	ENSG00000282056
CRYBG3	1.90038	7.32e-08	ENSG00000080200
CRYL1	-1.51824	2.9e-10	ENSG00000165475
CRYM	-8.12721	3.41e-25	ENSG00000103316
CSMD2	3.05212	4.66e-42	ENSG00000121904
CSNK2B-LY6G5B-1181	-1.80887	2.75e-05	ENSG00000263020
CSPG4	2.54464	2.22e-21	ENSG00000173546
CSPG4P10	2.52043	1.98e-38	ENSG00000276710
CSPG4P11	3.01401	7.18e-34	ENSG00000259726
CSPG4P12	2.02754	1.08e-16	ENSG00000259295
CSRP1	-1.72624	0.000521669	ENSG00000159176
CTA-14H9.5	-2.72698	1.7e-19	ENSG00000261353
CTA-228A9.3	-1.69099	0.000731645	ENSG00000272720
CTA-941F9.10	2.1022	3.38e-07	ENSG00000280383
CTA-963H5.5	1.2492	0.00100073	ENSG00000250318
CTB-191K22.5	-6.2048	4.72e-14	ENSG00000267815
CTB-31O20.3	-5.417	9.52e-15	ENSG00000267007
CTB-31O20.6	-3.10191	2.2e-12	ENSG00000267125
CTB-43P18.1	-3.52594	6.54e-14	ENSG00000272742
CTB-75G16.3	-2.743	4.33e-10	ENSG00000275720
CTC-203F4.2	-1.95976	0.00598283	ENSG00000270021
CTC-251I16.1	-2.24415	6.71e-05	ENSG00000279496
CTC-260E6.4	2.05704	7.07e-11	ENSG00000280079
CTC-338M12.5	-1.85198	8.71e-05	ENSG00000250222
CTC-429P9.1	-1.74793	1.82e-09	ENSG00000269427
CTC-444N24.6	-1.056	0.0211609	ENSG00000267871
CTC-444N24.7	2.33404	0.000653324	ENSG00000279541
CTC-471F3.5	1.71654	2.54e-13	ENSG00000269069
CTC-510F12.6	-3.27229	1.85e-05	ENSG00000267576
CTC-526N19.1	-1.75278	5.84e-06	ENSG00000277013
CTC-543D15.8	-1.75501	1.34e-06	ENSG00000278611
CTC-575D19.1	-2.99203	0.00032325	ENSG00000233913
CTD-2008E3.1	-1.1442	0.00217263	ENSG00000279923
CTD-2012K14.8	-1.69319	2.9e-12	ENSG00000276075
CTD-2047H16.4	1.27885	2.32e-13	ENSG00000263069
CTD-2049O4.1	-2.47626	0.000188516	ENSG00000261329
CTD-2126E3.4	-2.74143	2.98e-06	ENSG00000267890
CTD-2170G1.2	-3.47388	0.000175226	ENSG00000251575
CTD-2267D19.1	1.65745	2.5e-05	ENSG00000278918
CTD-2287O16.1	-3.041	1.06e-51	ENSG00000185641
CTD-2292M16.8	-1.67145	1.49e-05	ENSG00000258768
CTD-2369P2.12	-6.15538	7.68e-12	ENSG00000267303
CTD-2396E7.10	-5.46356	1.52e-09	ENSG00000268191
CTD-2514K5.4	-7.41589	1.31e-06	ENSG00000264272
CTD-2517O10.6	-1.33862	0.000251336	ENSG00000272323
CTD-2527I21.4	-3.48229	0.00139984	ENSG00000221857
CTD-2531D15.5	-5.1204	2.4e-11	ENSG00000255126
CTD-2540B15.11	-4.85953	2.01e-13	ENSG00000267580
CTD-2540B15.13	-2.46167	0.000711904	ENSG00000273420
CTD-2541J13.1	1.98245	1.92e-15	ENSG00000260578
CTD-2541J13.2	0.607409	0.00252406	ENSG00000263424
CTD-2545M3.8	-2.12329	0.00458458	ENSG00000268518
CTD-2561B21.8	1.87247	0.000274704	ENSG00000280351
CTD-2562J17.6	-2.14689	4.68e-08	ENSG00000279117
CTD-2647L4.4	1.79258	2.11e-09	ENSG00000259366
CTD-3035K23.3	3.15672	1.23e-27	ENSG00000279713
CTD-3131K8.2	1.39563	2.46e-07	ENSG00000269439
CTD-3157E16.2	-1.55123	1.87e-06	ENSG00000276855
CTF1	-1.34218	9.05e-07	ENSG00000150281
CTHRC1	2.27296	2.09e-11	ENSG00000164932
CTRB1	-4.97586	0.0010969	ENSG00000168925
CTXN2	-2.57395	5.51e-08	ENSG00000233932
CXCL11	-7.42653	0.00395494	ENSG00000169248
CXCL14	-4.81694	4.4e-08	ENSG00000145824
CXXC4	1.37105	0.000542465	ENSG00000168772
CYB5B	-1.30058	1.89e-18	ENSG00000103018
CYGB	-2.04362	2.52e-09	ENSG00000161544
CYP11A1	-2.92954	9.68e-15	ENSG00000140459
CYP17A1	-2.09697	1.52e-13	ENSG00000148795
CYP26B1	1.35919	0.00639627	ENSG00000003137
CYP27C1	2.88661	8.14e-15	ENSG00000186684
CYP2B7P	-1.47111	0.00284639	ENSG00000256612
CYP2J2	-1.98415	0.0170159	ENSG00000134716
CYP39A1	1.29562	0.000161999	ENSG00000146233
CYP3A5	1.91	1.13e-06	ENSG00000106258
CYP46A1	-2.67359	2.29e-09	ENSG00000036530
CYP4X1	-2.93737	6.26e-13	ENSG00000186377
CYS1	-1.98664	0.00219168	ENSG00000205795
CYSTM1	-1.60785	7.87e-08	ENSG00000120306
DAD1	-1.06191	5.34e-11	ENSG00000129562
DBNDD2	-2.07485	0.000535294	ENSG00000244274
DCHS1	2.14172	2.96e-36	ENSG00000166341
DCLK2	1.18337	2.77e-05	ENSG00000170390
DCLRE1C	1.33453	3.67e-19	ENSG00000152457
DCN	-2.02471	0.000208116	ENSG00000011465
DCTN1-AS1	-3.11693	5.49e-11	ENSG00000237737
DCX	3.59693	7.84e-27	ENSG00000077279
DCXR	-1.31274	1.32e-12	ENSG00000169738
DDIAS	2.98507	3e-53	ENSG00000165490
DDN	-4.10698	9.47e-07	ENSG00000181418
DDO	-1.45643	0.00107045	ENSG00000203797
DDX12P	2.72718	6.73e-21	ENSG00000214826
DEPDC1	4.83603	2.5e-81	ENSG00000024526
DEPDC1B	2.29863	2.43e-07	ENSG00000035499
DGCR6	-1.27661	3.74e-10	ENSG00000183628
DGKZ	-1.48522	0.00677899	ENSG00000149091
DGKZP1	-1.8169	4.55e-06	ENSG00000179611
DHRS7	-1.03001	9.55e-12	ENSG00000100612
DISP1	1.24525	4.63e-11	ENSG00000154309
DKFZp779M0652	-2.53279	2.18e-09	ENSG00000205106
DKK3	-1.4863	2.2e-09	ENSG00000050165
DLEU2L	1.89589	2.36e-05	ENSG00000116652
DLG2	-2.22062	5.08e-16	ENSG00000150672
DLG4	-1.22854	0.000557671	ENSG00000132535
DLG5	2.21538	1.47e-45	ENSG00000151208
DLGAP2	-3.0668	2.32e-11	ENSG00000198010
DLL3	3.00112	3.18e-22	ENSG00000090932
DLX1	-4.42062	5.33e-11	ENSG00000144355
DLX2	-5.0181	7.62e-07	ENSG00000115844
DMKN	-3.87136	4.45e-09	ENSG00000161249
DMRTC1B	-2.77389	1.61e-12	ENSG00000184911
DMTN	-2.79428	5.39e-14	ENSG00000158856
DNAAF1	-2.72996	7.14e-06	ENSG00000154099
DNAH14	2.25643	3.7e-10	ENSG00000185842
DNAI1	-2.39155	0.00232498	ENSG00000122735
DNAJB1	1.82158	0.00026372	ENSG00000132002
DNAJC12	-1.54116	0.0011851	ENSG00000108176
DNAJC22	1.41003	7.09e-05	ENSG00000178401
DNAL4	-1.08326	5.82e-10	ENSG00000100246
DNASE1	1.05365	3.3e-07	ENSG00000213918
DNASE1L1	-1.46995	5.49e-09	ENSG00000013563
DND1P1	1.91794	0.0153682	ENSG00000264070
DNM1P47	1.94905	5.15e-06	ENSG00000259660
DNM1P51	3.09014	5.89e-35	ENSG00000235370
DNMT1	1.13817	9.92e-19	ENSG00000130816
DNMT3B	1.47112	6.63e-15	ENSG00000088305
DOC2A	-2.3809	4.91e-06	ENSG00000149927
DOCK9-AS2	-2.30513	1.25e-20	ENSG00000260992
DOK2	1.69054	0.00494729	ENSG00000147443
DOT1L	1.33517	1.2e-07	ENSG00000104885
DPCD	-1.14482	2.37e-07	ENSG00000166171
DPY19L2P2	1.40512	5.36e-05	ENSG00000170629
DPYSL3	1.30002	3.23e-09	ENSG00000113657
DRAXIN	3.69046	6.76e-31	ENSG00000162490
DRD1	-4.81574	3.48e-10	ENSG00000184845
DSCAM	2.18137	2.6e-05	ENSG00000171587
DSG2	1.79306	0.00766183	ENSG00000046604
DTL	4.77872	8.55e-97	ENSG00000143476
DTX2P1	1.95802	1.16e-09	ENSG00000186704
DUOX1	1.27652	0.000919057	ENSG00000137857
DUSP18	1.69049	7.94e-16	ENSG00000167065
DUSP26	-1.18729	0.00485347	ENSG00000133878
DUSP8P5	1.71794	3.83e-12	ENSG00000235316
DUX4L50	1.21294	6.37e-06	ENSG00000232815
DUXAP8	2.7125	5.39e-23	ENSG00000206195
DUXAP9	3.24389	2.89e-34	ENSG00000225210
DYDC2	-3.65737	0.00246425	ENSG00000133665
DYNC1I1	-1.75073	0.000164201	ENSG00000158560
DYNLRB2	-2.73613	6.89e-08	ENSG00000168589
DYRK2	1.77901	1.02e-37	ENSG00000127334
DYRK3	2.17768	4e-14	ENSG00000143479
E2F2	4.78443	1.01e-44	ENSG00000007968
E2F7	3.79764	1.59e-26	ENSG00000165891
E2F8	3.80242	2.97e-21	ENSG00000129173
EBI3	-1.65352	0.00032194	ENSG00000105246
ECHS1	-1.72434	1.34e-31	ENSG00000127884
ECSCR	-2.32511	1.39e-05	ENSG00000249751
ECT2	2.01551	2.08e-36	ENSG00000114346
EDN3	-4.20461	0.00533173	ENSG00000124205
EEF1B2	-1.32778	1.63e-15	ENSG00000114942
EEF1B2P3	-1.62335	2.76e-06	ENSG00000232472
EEF1E1	-1.30915	3.44e-12	ENSG00000124802
EEPD1	1.99307	2.75e-18	ENSG00000122547
EFCAB13	1.26717	0.00120304	ENSG00000178852
EFCC1	-1.86202	4.8e-06	ENSG00000114654
EFHD1	-1.84773	0.00122125	ENSG00000115468
EFNA2	3.46504	3.63e-49	ENSG00000099617
EGFEM1P	2.92886	4.07e-12	ENSG00000206120
EGFL7	-1.69333	1.15e-06	ENSG00000172889
EGFR	1.86601	3.09e-06	ENSG00000146648
EGR4	-6.41344	6.78e-13	ENSG00000135625
EIF4E3	-1.35323	1.6e-14	ENSG00000163412
EIF4EBP1	1.40351	0.000452622	ENSG00000187840
EIF4EBP3	-1.69017	4.24e-09	ENSG00000243056
EIF4EP2	-1.66409	1.4e-05	ENSG00000229944
ELFN1	3.3313	7.91e-46	ENSG00000225968
ELL3	-1.72568	3.02e-09	ENSG00000128886
ELN	1.85759	6.2e-06	ENSG00000049540
ELOVL2	-3.79899	1.26e-17	ENSG00000197977
ELOVL7	-2.44745	0.00935664	ENSG00000164181
EMC3-AS1	1.46939	5.28e-20	ENSG00000180385
EMC7	-1.47267	2.65e-24	ENSG00000134153
EME1	2.38276	3.71e-32	ENSG00000154920
EMILIN3	2.89998	3.43e-17	ENSG00000183798
EMX2	-5.86982	2.81e-24	ENSG00000170370
EMX2OS	-5.84916	4.58e-19	ENSG00000229847
ENHO	-2.05344	0.0141201	ENSG00000168913
ENTPD2	-2.70872	1.92e-09	ENSG00000054179
ENTPD3	-2.59121	4.68e-08	ENSG00000168032
EPB41L1	-1.20603	0.000742417	ENSG00000088367
EPCAM	-3.77514	2.9e-11	ENSG00000119888
EPHB1	1.94503	8.87e-05	ENSG00000154928
EPHB2	1.92635	2.93e-19	ENSG00000133216
EPHB3	3.00983	3.37e-63	ENSG00000182580
EPHX1	-1.39017	0.00010559	ENSG00000143819
EPHX2	-1.80137	2.25e-08	ENSG00000120915
ERCC6L	3.30811	7.59e-35	ENSG00000186871
ERG	-1.58172	0.000836899	ENSG00000157554
ERICH6-AS1	-1.66482	1.15e-06	ENSG00000240137
ERVW-1	3.0042	3.69e-05	ENSG00000242950
ESPL1	4.04909	2.3e-54	ENSG00000135476
ETFB	-1.42288	7.45e-13	ENSG00000105379
ETNPPL	-3.61869	4.3e-06	ENSG00000164089
ETV1	2.31608	1.37e-17	ENSG00000006468
ETV7	-3.80197	3.89e-06	ENSG00000010030
EYA2	1.38244	0.000118402	ENSG00000064655
EZH2	2.13254	6.02e-08	ENSG00000106462
F11R	-1.82699	2.45e-08	ENSG00000158769
F2R	3.14981	3.08e-26	ENSG00000181104
FAAH2	-1.52143	5.81e-05	ENSG00000165591
FABP3	-2.27677	2.65e-08	ENSG00000121769
FABP5	-3.81378	4.66e-19	ENSG00000164687
FABP5P7	-5.95139	2.01e-32	ENSG00000234964
FABP6	-2.3107	0.00107423	ENSG00000170231
FAHD2B	-1.92339	4.35e-14	ENSG00000144199
FAHD2CP	-1.60489	0.00471273	ENSG00000231584
FAIM2	-1.22704	0.00476951	ENSG00000135472
FAM107A	-2.21319	4.31e-07	ENSG00000168309
FAM109A	1.04903	3.54e-14	ENSG00000198324
FAM110A	1.41069	2.02e-11	ENSG00000125898
FAM110C	1.25772	0.0119735	ENSG00000184731
FAM132B	2.28748	2.38e-11	ENSG00000178752
FAM135B	1.49305	1.22e-07	ENSG00000147724
FAM153A	-4.86552	5.53e-17	ENSG00000170074
FAM153B	-4.67959	4.14e-13	ENSG00000182230
FAM153C	-5.05094	3.85e-18	ENSG00000204677
FAM162B	1.5535	3.46e-07	ENSG00000183807
FAM171A2	1.59264	3.33e-08	ENSG00000161682
FAM181B	1.34498	1.76e-06	ENSG00000182103
FAM182B	1.43672	9.45e-07	ENSG00000175170
FAM184B	2.48784	1.62e-14	ENSG00000047662
FAM198A	1.91086	9.69e-18	ENSG00000144649
FAM212B	1.55645	3.08e-06	ENSG00000197852
FAM212B-AS1	1.32864	0.0113078	ENSG00000227811
FAM47E-STBD1	1.1402	1.01e-06	ENSG00000118804
FAM50B	-2.4131	1.77e-22	ENSG00000145945
FAM58A	-1.25672	2.67e-09	ENSG00000262919
FAM60A	1.57434	3.07e-10	ENSG00000139146
FAM64A	5.15793	9e-101	ENSG00000129195
FAM65B	-1.84247	6.77e-07	ENSG00000111913
FAM72A	1.28242	3e-07	ENSG00000196550
FAM72B	1.75797	4.53e-13	ENSG00000188610
FAM72C	2.68269	1.1e-18	ENSG00000263513
FAM72D	2.1647	1.29e-18	ENSG00000215784
FAM81A	-1.47331	0.0035906	ENSG00000157470
FAM83D	3.36727	2.64e-43	ENSG00000101447
FAM84B	1.60505	8.16e-08	ENSG00000168672
FAM92B	-4.10426	0.00168573	ENSG00000153789
FAM95B1	1.65975	3.13e-06	ENSG00000274628
FAM95B1	1.8134	5.25e-14	ENSG00000274628
FAM95B1	2.04922	3.13e-06	ENSG00000223839
FAM95B1	2.20287	5.15e-14	ENSG00000223839
FAM96B	-1.29501	9.6e-20	ENSG00000166595
FANCA	1.90522	2.22e-25	ENSG00000187741
FANCC	1.45414	2.57e-07	ENSG00000158169
FANCD2	2.12418	2.08e-38	ENSG00000144554
FANCI	2.71616	7.37e-59	ENSG00000140525
FANK1	-1.98665	0.000117336	ENSG00000203780
FAR2P1	-2.67934	0.0237748	ENSG00000180178
FBN2	4.6056	1.1e-59	ENSG00000138829
FBN3	3.92332	1.54e-30	ENSG00000142449
FBXL14	1.38607	1.85e-08	ENSG00000171823
FBXL15	-1.42766	1.62e-10	ENSG00000107872
FBXL16	-2.55869	0.000517539	ENSG00000127585
FBXL19-AS1	1.34442	2.77e-06	ENSG00000260852
FBXO2	-1.87102	1.16e-06	ENSG00000116661
FBXO44	-1.30971	2.76e-05	ENSG00000132879
FBXO46	1.09948	1.09e-24	ENSG00000177051
FBXO5	1.47125	1.72e-12	ENSG00000112029
FCER1G	-1.78814	0.000294688	ENSG00000158869
FCGBP	3.07999	2.24e-09	ENSG00000275395
FCGR1B	-1.87494	0.000266963	ENSG00000198019
FCGR1C	-2.26506	9.08e-05	ENSG00000265531
FERMT1	3.21419	1.86e-32	ENSG00000101311
FEZF1	-6.73237	5.29e-10	ENSG00000128610
FEZF1-AS1	-6.62258	5.39e-10	ENSG00000230316
FEZF2	-6.48591	7.18e-14	ENSG00000153266
FGD1	1.28593	2.87e-13	ENSG00000102302
FGF1	-2.04329	0.000779388	ENSG00000113578
FGF13	-1.92952	0.00476758	ENSG00000129682
FGF22	-1.4372	2.13e-05	ENSG00000070388
FHDC1	1.3759	8.99e-05	ENSG00000137460
FIBIN	1.08969	0.00224678	ENSG00000176971
FIGF	-2.55815	3.04e-07	ENSG00000165197
FIGN	2.07126	1.46e-27	ENSG00000182263
FIRRE	3.59083	3.59e-23	ENSG00000213468
FIS1	-1.25677	2.27e-08	ENSG00000214253
FJX1	1.84833	1.42e-16	ENSG00000179431
FKBP10	1.58772	1.95e-05	ENSG00000141756
FKBP1A	-1.17206	6.17e-05	ENSG00000088832
FKBP1B	-1.97807	2.22e-08	ENSG00000119782
FKBP3	-1.39613	5.08e-21	ENSG00000100442
FLJ26850	-1.86793	4.88e-06	ENSG00000204666
FLNC	1.70434	0.00162874	ENSG00000128591
FLRT1	1.81871	1.59e-11	ENSG00000126500
FLRT3	1.53623	0.0023071	ENSG00000125848
FNDC3B	1.66528	0.00108811	ENSG00000075420
FNDC9	-3.84743	8.27e-06	ENSG00000172568
FOSL2	1.22014	0.00759826	ENSG00000075426
FOXG1	-6.0124	9.74e-08	ENSG00000176165
FOXK1	1.96351	3.72e-43	ENSG00000164916
FOXM1	4.78685	3.31e-166	ENSG00000111206
FOXO3B	3.15979	2.53e-63	ENSG00000240445
FREM2	3.03276	7.45e-06	ENSG00000150893
FREM3	3.91822	0.000123846	ENSG00000183090
FRMPD3	1.81877	4.45e-10	ENSG00000147234
FRMPD4	-2.31598	0.00415345	ENSG00000169933
FTCD	-2.29179	1.43e-05	ENSG00000160282
FTH1	-1.15986	2.93e-06	ENSG00000167996
FTH1P11	-1.8149	4.73e-08	ENSG00000237264
FTH1P20	-2.08647	0.000235895	ENSG00000226564
FTH1P7	-2.46559	3.61e-11	ENSG00000232187
FTH1P8	-1.75941	1.93e-07	ENSG00000219507
FTL	-1.06667	0.00170425	ENSG00000087086
FTLP3	-1.19653	0.00173448	ENSG00000226608
FUNDC1	-1.50962	8.92e-18	ENSG00000069509
FXYD1	-3.06182	4.84e-16	ENSG00000266964
FXYD2	2.33664	1.23e-06	ENSG00000137731
FXYD3	-1.58343	0.00921312	ENSG00000089356
FZD10-AS1	1.82691	4.55e-05	ENSG00000250208
FZD2	1.93728	1.6e-11	ENSG00000180340
FZD3	1.05297	7.63e-05	ENSG00000104290
GABARAP	-1.12153	4.08e-17	ENSG00000170296
GABARAPL1	-1.63981	2.2e-13	ENSG00000139112
GABARAPL2	-1.37729	2.5e-25	ENSG00000034713
GABRA1	-4.27708	2.54e-05	ENSG00000022355
GABRA4	-3.78353	0.0056506	ENSG00000109158
GABRB2	-3.11248	9.97e-06	ENSG00000145864
GABRG2	-3.76844	8.09e-06	ENSG00000113327
GAD2	-7.86982	3.98e-20	ENSG00000136750
GALNT14	1.4951	1.09e-07	ENSG00000158089
GALNTL5	-5.5411	3.28e-07	ENSG00000106648
GALR1	3.21897	3.2e-26	ENSG00000166573
GAREML	1.16154	0.0093542	ENSG00000157833
GAS1	2.06987	1.15e-14	ENSG00000180447
GAS2L1P2	-2.79212	0.0230649	ENSG00000228376
GAS2L2	-2.15927	0.0119396	ENSG00000270765
GAS2L3	2.29029	9.07e-05	ENSG00000139354
GAS6-AS2	-1.6149	3.97e-14	ENSG00000272695
GATSL2	2.23236	2.48e-16	ENSG00000274070
GCH1	-2.59356	6.25e-07	ENSG00000131979
GCSH	-1.32675	5.96e-05	ENSG00000140905
GCSHP5	-3.09929	4.76e-27	ENSG00000224837
GDA	-3.72565	0.000694293	ENSG00000119125
GFPT2	1.5158	0.00012631	ENSG00000131459
GH1	-11.6077	0.00207053	ENSG00000259384
GHITM	-1.54173	1.32e-12	ENSG00000165678
GIMAP4	-2.07363	2.44e-05	ENSG00000133574
GIMAP5	-2.67323	2.67e-10	ENSG00000196329
GIMAP6	-1.27552	0.00156745	ENSG00000133561
GIMAP7	-2.82156	2.67e-10	ENSG00000179144
GIMAP8	-1.15256	0.0263996	ENSG00000171115
GINS1	1.76388	7.9e-16	ENSG00000101003
GINS3	1.2021	7.75e-07	ENSG00000181938
GIPC2	-1.19421	0.00163005	ENSG00000137960
GJA4	-2.17238	1.57e-06	ENSG00000187513
GJA5	-2.28301	0.00471827	ENSG00000265107
GJB6	-5.70634	2.93e-07	ENSG00000121742
GJC1	2.75497	7.67e-24	ENSG00000182963
GJD2	-2.59263	7.66e-05	ENSG00000159248
GLCCI1	1.69247	7.54e-21	ENSG00000106415
GLI2	2.49688	1.59e-25	ENSG00000074047
GLIS1	2.51678	3.3e-20	ENSG00000174332
GLIS3	2.44591	3.39e-25	ENSG00000107249
GLP1R	2.30665	0.000903672	ENSG00000112164
GLRA2	-4.19286	1.65e-07	ENSG00000101958
GLS2	-3.0278	3.64e-09	ENSG00000135423
GLT8D2	-1.43545	0.00233421	ENSG00000120820
GMFG	-1.53559	0.000553458	ENSG00000130755
GMPR	-1.89546	0.00265187	ENSG00000137198
GNA14	-2.26626	2.37e-06	ENSG00000156049
GNB4	1.58236	2.85e-18	ENSG00000114450
GNG11	-1.43449	0.00694671	ENSG00000127920
GNG12	1.24298	2.36e-12	ENSG00000172380
GNG3	-2.84776	0.00061647	ENSG00000162188
GNG7	-1.84304	0.00406547	ENSG00000176533
GNGT2	-1.52914	0.000196268	ENSG00000167083
GNL3LP1	1.6547	6.05e-14	ENSG00000215032
GNLY	-2.64332	0.00204602	ENSG00000115523
GOLGA2P10	2.04906	7.89e-43	ENSG00000255769
GOLGA2P7	1.89197	3.36e-41	ENSG00000225151
GOLGA7B	-1.5264	0.0246981	ENSG00000155265
GOLT1A	-3.30255	7.03e-12	ENSG00000174567
GOT1	-2.04914	6.85e-12	ENSG00000120053
GOT2	-1.08663	3.18e-13	ENSG00000125166
GP2	-7.94484	5.58e-09	ENSG00000169347
GPC1	1.49308	1.64e-18	ENSG00000063660
GPC2	2.70165	2.76e-38	ENSG00000213420
GPR143	-3.88378	9.25e-28	ENSG00000101850
GPR153	1.865	9.55e-08	ENSG00000158292
GPR156	2.88092	8.22e-30	ENSG00000175697
GPR157	1.33506	0.010334	ENSG00000180758
GPR158-AS1	-1.91442	0.0113105	ENSG00000233642
GPR161	2.07923	3.3e-32	ENSG00000143147
GPR17	2.92995	8.33e-19	ENSG00000144230
GPR173	1.25288	1.87e-08	ENSG00000184194
GPR179	1.66618	0.00319698	ENSG00000277399
GPR4	-1.4442	0.0109683	ENSG00000177464
GPR6	-6.60431	7.93e-09	ENSG00000146360
GPR61	-1.2978	0.00304712	ENSG00000156097
GPR63	1.34123	0.000281503	ENSG00000112218
GPR83	-2.22892	2.33e-06	ENSG00000123901
GPR88	-3.97814	0.0075242	ENSG00000181656
GPRASP1	-1.12602	0.00728203	ENSG00000198932
GPSM1	1.37491	2.44e-09	ENSG00000160360
GPX7	1.2448	5.29e-12	ENSG00000116157
GREM2	-2.44305	6.59e-05	ENSG00000180875
GRIA4	1.84752	2.26e-06	ENSG00000152578
GRID2	2.37717	1.08e-06	ENSG00000152208
GRID2IP	2.24616	7.24e-11	ENSG00000215045
GRIK3	2.09214	2.67e-07	ENSG00000163873
GRIN2D	2.16504	2.85e-14	ENSG00000105464
GRM5-AS1	-6.31231	6.84e-05	ENSG00000255082
GRM6	1.65035	1.71e-07	ENSG00000113262
GRP	-6.24596	3.44e-13	ENSG00000134443
GS1-124K5.4	-1.26583	9.63e-06	ENSG00000237310
GSKIP	-1.57299	6.7e-13	ENSG00000100744
GSTM3	-1.42518	3.14e-07	ENSG00000134202
GSTM5	-4.72256	9.25e-21	ENSG00000134201
GSTO1	-1.8252	7.57e-18	ENSG00000148834
GTSE1	5.24916	1.5e-139	ENSG00000075218
GUCY1B3	-1.77133	1.51e-05	ENSG00000061918
GXYLT1P3	2.91233	7.73e-07	ENSG00000232433
H19	5.03769	2.27e-15	ENSG00000130600
H2AFJ	-1.57739	3.37e-06	ENSG00000246705
H2AFY2	1.19508	2.83e-15	ENSG00000099284
H3F3AP4	1.53686	1.46e-18	ENSG00000235655
HABP4	-1.40411	1.42e-12	ENSG00000130956
HAGH	-1.07438	5.82e-13	ENSG00000063854
HAR1A	-3.18367	3.99e-14	ENSG00000225978
HAR1B	-3.19725	1.56e-12	ENSG00000231133
HAS1	-1.64758	0.000617309	ENSG00000105509
HAS2	3.42499	3.94e-33	ENSG00000170961
HAUS3	1.18023	4.32e-13	ENSG00000214367
HCFC1R1	-1.59866	4.91e-20	ENSG00000103145
HCG11	-2.1988	1.57e-14	ENSG00000228223
HCG25	-2.81304	1.85e-36	ENSG00000232940
HCG4P3	1.40873	9.79e-05	ENSG00000237669
HCST	-2.20985	3.07e-08	ENSG00000126264
HDAC11	-1.61141	3.91e-06	ENSG00000163517
HDDC2	-1.77542	2.94e-18	ENSG00000111906
HDHD3	-1.4337	3.12e-08	ENSG00000119431
HEBP1	-1.07572	3.47e-12	ENSG00000013583
HELB	1.63017	6.94e-12	ENSG00000127311
HELLPAR	2.91416	3.09e-18	ENSG00000281344
HELLS	2.10951	2.62e-24	ENSG00000119969
HEPH	-2.10324	3.59e-08	ENSG00000089472
HEPN1	-2.27491	0.00128932	ENSG00000221932
HERC2P4	2.54215	4.88e-11	ENSG00000230267
HES6	1.9583	9.12e-16	ENSG00000144485
HEY1	1.40263	1.57e-11	ENSG00000164683
HHATL	-3.5438	6.29e-05	ENSG00000010282
HHLA3	-1.24673	4.49e-09	ENSG00000197568
HIGD1A	-2.01804	4.75e-17	ENSG00000181061
HILS1	2.85393	2.42e-12	ENSG00000188662
HINT1	-1.85942	1.38e-31	ENSG00000169567
HINT2	-1.33552	2.84e-07	ENSG00000137133
HIST1H2AG	4.12842	2.15e-11	ENSG00000196787
HIST1H2BN	2.65617	0.0112284	ENSG00000233822
HIST1H4I	2.98713	0.000218015	ENSG00000276180
HIST2H2BD	2.41343	4.15e-05	ENSG00000220323
HIST2H3A	4.04021	2.7e-06	ENSG00000203852
HIST2H3C	4.30174	2.7e-06	ENSG00000203811
HIST3H2A	1.74928	1.39e-07	ENSG00000181218
HIST3H2BB	2.42473	0.00703403	ENSG00000196890
HJURP	5.26387	4.38e-81	ENSG00000123485
HK2	2.04598	7.29e-08	ENSG00000159399
HLF	-1.54421	0.000327242	ENSG00000108924
HMCN2	3.55341	1.44e-24	ENSG00000148357
HMGA2	2.47981	0.00263939	ENSG00000149948
HMGB1P5	-1.57405	1.76e-08	ENSG00000132967
HMGCLL1	-1.87573	0.000542262	ENSG00000146151
HMMR	1.83919	3.72e-05	ENSG00000072571
HMOX2	-1.27485	4.62e-13	ENSG00000103415
HMP19	-2.53582	0.000197293	ENSG00000170091
HMX1	4.64872	1.04e-96	ENSG00000215612
HNRNPCP7	1.47814	9.45e-10	ENSG00000228653
HOOK1	-2.49613	3.99e-05	ENSG00000134709
HOTAIRM1	2.9201	2.69e-07	ENSG00000233429
HOXA-AS2	5.58445	3.38e-07	ENSG00000253552
HOXA2	6.08776	4.21e-07	ENSG00000105996
HOXA3	5.79676	2.88e-09	ENSG00000105997
HOXB2	2.82769	0.00121571	ENSG00000173917
HOXC4	3.44367	6.79e-10	ENSG00000198353
HOXD3	4.79446	2.06e-21	ENSG00000128652
HOXD4	5.12637	0.00216059	ENSG00000170166
HPCA	-4.63084	3.39e-09	ENSG00000121905
HPGD	-2.03195	0.0210543	ENSG00000164120
HPN-AS1	-3.21721	0.000307825	ENSG00000227392
HPRT1	-2.47598	1.22e-19	ENSG00000165704
HRASLS	1.43721	3.77e-05	ENSG00000127252
HRC	-1.69242	3.93e-06	ENSG00000130528
HRCT1	-1.69757	0.0153592	ENSG00000196196
HRH1	2.44837	9.28e-22	ENSG00000196639
HRSP12	-2.1011	5.67e-05	ENSG00000132541
HS3ST1	2.84157	1.62e-47	ENSG00000002587
HS3ST3A1	5.3529	4.24e-29	ENSG00000153976
HS3ST3B1	3.04658	1.07e-11	ENSG00000125430
HS3ST4	-2.50001	9.85e-05	ENSG00000182601
HSBP1L1	-1.16914	1.16e-12	ENSG00000226742
HSD11B1	-3.2687	7.54e-13	ENSG00000117594
HSD17B6	-2.35429	1.18e-05	ENSG00000025423
HSD17B8	-1.16772	0.000612211	ENSG00000204228
HSPA2	-2.53241	0.00656366	ENSG00000126803
HSPA4L	1.22116	0.00386394	ENSG00000164070
HSPB2	-1.23223	0.000651025	ENSG00000170276
HTR1D	-2.86719	0.00720003	ENSG00000179546
HTR1E	-3.96009	5.31e-05	ENSG00000168830
HTR2C	-4.29676	2.28e-05	ENSG00000147246
HTR5A	-3.08757	0.000188496	ENSG00000157219
HTR5A-AS1	-3.88958	1.29e-06	ENSG00000220575
HUNK	2.62129	2.12e-18	ENSG00000142149
HYDIN2	2.01034	7.34e-06	ENSG00000276975
ICAM2	-2.60442	1.62e-08	ENSG00000108622
ICAM5	-3.88976	0.000224052	ENSG00000105376
IDH3A	-1.50251	2.3e-18	ENSG00000166411
IDNK	-1.53582	9.72e-11	ENSG00000148057
IDS	0.0910411	5.04e-06	ENSG00000010404
IDS	-1.64935	4.79e-06	ENSG00000010404
IER5	1.60412	1.38e-08	ENSG00000162783
IFI27	-1.93214	0.0017135	ENSG00000165949
IFI27L2	-1.17989	1.62e-09	ENSG00000119632
IFITM1	-3.6509	2.96e-08	ENSG00000185885
IFITM2	-2.8287	2.84e-11	ENSG00000185201
IFITM3	-2.65168	1.73e-10	ENSG00000142089
IGDCC3	1.35479	8.33e-07	ENSG00000174498
IGDCC4	1.70244	4.43e-11	ENSG00000103742
IGF1	-2.48254	0.0159361	ENSG00000017427
IGF2	3.12402	3.17e-11	ENSG00000167244
IGF2BP2	3.3195	1.96e-30	ENSG00000073792
IGF2BP3	6.88892	6.32e-99	ENSG00000136231
IGFBP2	3.79564	1.76e-35	ENSG00000115457
IGFBP5	2.38828	2.37e-13	ENSG00000115461
IGFBP6	-3.3732	0.000113246	ENSG00000167779
IGFLR1	-1.19741	0.000990264	ENSG00000126246
IGSF3	2.66637	7.47e-39	ENSG00000143061
IGSF9	3.8813	2.24e-55	ENSG00000085552
IGSF9B	3.28806	3.14e-28	ENSG00000080854
IL1R1	-1.84429	0.00606792	ENSG00000115594
IL1RAP	1.42049	0.000220961	ENSG00000196083
IL1RL1	-4.19391	0.000581759	ENSG00000115602
IL1RL2	-1.53124	0.000661867	ENSG00000115598
IL20RA	-1.82712	0.000128773	ENSG00000016402
IL34	-2.49826	1.64e-05	ENSG00000157368
ILDR2	2.6754	6.5e-27	ENSG00000143195
IMPA2	-1.64541	0.00291187	ENSG00000141401
IMPG2	1.52484	0.00255608	ENSG00000081148
INCENP	1.77223	6.43e-15	ENSG00000149503
INE1	1.41191	4.52e-07	ENSG00000224975
INE2	-2.03982	0.0182361	ENSG00000281371
INHBA-AS1	-4.02758	1.61e-08	ENSG00000224116
INO80B-WBP1	-1.40393	0.00258232	ENSG00000274049
INO80C	-1.15934	3.94e-15	ENSG00000153391
INPP5F	-1.68175	1.89e-05	ENSG00000198825
INSRR	2.35966	7.59e-05	ENSG00000027644
IPCEF1	-2.32819	4.01e-07	ENSG00000074706
IPMK	1.03645	1.19e-12	ENSG00000151151
IQCA1	-1.96375	1.52e-06	ENSG00000132321
IQGAP2	2.4937	1.65e-15	ENSG00000145703
IQGAP3	4.2132	3.48e-33	ENSG00000183856
IQSEC3	-3.24714	6.14e-07	ENSG00000120645
IRF2BP2	1.65698	2.66e-37	ENSG00000168264
IRF6	-3.37281	3.55e-12	ENSG00000117595
IRS1	1.92051	4.96e-16	ENSG00000169047
IRS2	1.88038	1.8e-16	ENSG00000185950
IRX1	4.52611	4.56e-41	ENSG00000170549
IRX2	4.12151	4.86e-29	ENSG00000170561
IRX5	2.63853	5.51e-07	ENSG00000176842
ISCU	-1.82308	4.3e-28	ENSG00000136003
ITGA4	2.09458	1.11e-05	ENSG00000115232
ITGA9	1.53065	4.42e-05	ENSG00000144668
ITPKA	-2.41114	0.0101008	ENSG00000137825
ITPRIPL1	2.04638	3.22e-20	ENSG00000198885
JADE3	1.08865	7.34e-06	ENSG00000102221
JAKMIP1	-2.03097	3.21e-06	ENSG00000152969
JAZF1-AS1	-2.67533	1.3e-10	ENSG00000234336
JPH1	-2.20707	0.00252095	ENSG00000104369
JRK	1.44115	1.33e-18	ENSG00000234616
KANSL1L	1.22183	1.91e-17	ENSG00000144445
KAZN	1.1583	8.02e-08	ENSG00000189337
KB-1125A3.11	-1.79203	6.85e-09	ENSG00000272973
KB-1517D11.4	-3.12779	0.000139812	ENSG00000272321
KBTBD12	-2.3685	1.69e-09	ENSG00000187715
KCNA3	2.77652	4.75e-05	ENSG00000177272
KCNAB2	-1.73054	0.0130995	ENSG00000069424
KCND2	2.37202	1.61e-08	ENSG00000184408
KCNG1	2.25897	6.77e-13	ENSG00000026559
KCNIP2	-2.95248	8.13e-08	ENSG00000120049
KCNJ14	1.20618	1.18e-06	ENSG00000182324
KCNJ4	-2.98047	0.00036929	ENSG00000168135
KCNMB4	-1.7501	0.00104519	ENSG00000135643
KCNQ1OT1	2.71216	0.000216304	ENSG00000269821
KCNT2	2.2619	7.89e-28	ENSG00000162687
KCNV1	-4.4657	8.78e-08	ENSG00000164794
KCTD4	-1.92186	0.00827774	ENSG00000180332
KDM4B	1.52499	2.23e-30	ENSG00000127663
KDM5B	1.74909	1.92e-10	ENSG00000117139
KDM7A	1.09218	2.67e-07	ENSG00000006459
KHDRBS3	1.42848	1.83e-12	ENSG00000131773
KIAA0101	2.73127	2.01e-21	ENSG00000166803
KIAA0513	-1.61706	0.000393403	ENSG00000135709
KIAA0922	1.41803	5.77e-12	ENSG00000121210
KIAA1211	2.49833	3.02e-13	ENSG00000109265
KIAA1524	2.03242	1.41e-31	ENSG00000163507
KIAA1549	2.51752	2.54e-27	ENSG00000122778
KIAA1586	1.17749	8.11e-14	ENSG00000168116
KIAA1919	1.73757	4.79e-09	ENSG00000173214
KIAA1958	1.90859	1.68e-22	ENSG00000165185
KIF11	3.49756	8.61e-96	ENSG00000138160
KIF12	-3.22651	4.36e-10	ENSG00000136883
KIF14	5.31148	2.89e-121	ENSG00000118193
KIF15	3.18392	7.51e-61	ENSG00000163808
KIF17	-1.52081	0.00619799	ENSG00000117245
KIF18A	3.33957	1.31e-39	ENSG00000121621
KIF18B	6.0993	9.09e-146	ENSG00000186185
KIF20A	5.08401	3.29e-43	ENSG00000112984
KIF20B	1.98262	3.42e-17	ENSG00000138182
KIF21B	1.4673	0.000898219	ENSG00000116852
KIF23	3.91352	1.31e-71	ENSG00000137807
KIF26A	1.84673	1.08e-16	ENSG00000066735
KIF26B	2.6808	1.79e-21	ENSG00000162849
KIF2C	4.20752	2.29e-128	ENSG00000142945
KIF4A	3.67658	4.11e-50	ENSG00000090889
KIF5A	-2.73996	1.13e-05	ENSG00000155980
KIF7	1.43759	4.15e-12	ENSG00000166813
KIFC1	4.61455	1.46e-79	ENSG00000237649
KIRREL	1.84154	6.92e-05	ENSG00000183853
KIZ	1.26883	4.01e-12	ENSG00000088970
KL	-1.70804	0.000256532	ENSG00000133116
KLF12	1.7837	1.39e-23	ENSG00000118922
KLF4	-1.29581	0.0335199	ENSG00000136826
KLHDC9	-1.41494	1.46e-05	ENSG00000162755
KLHL11	2.77619	4.08e-15	ENSG00000178502
KLHL2	-1.63871	8.45e-09	ENSG00000109466
KLHL25	2.53818	5.23e-30	ENSG00000183655
KLHL3	-1.14244	0.00626082	ENSG00000146021
KLK10	-2.8325	0.000919855	ENSG00000129451
KLK7	-4.12552	0.000939048	ENSG00000169035
KLRC2	2.93162	2.81e-11	ENSG00000205809
KLRC3	2.09082	2.32e-05	ENSG00000205810
KLRK1	2.41175	5.98e-16	ENSG00000213809
KNTC1	2.00925	1.06e-35	ENSG00000184445
KRT1	-5.88858	1.03e-19	ENSG00000167768
KRT13	-8.88706	5.25e-17	ENSG00000171401
KRT19	-3.26752	3.64e-14	ENSG00000171345
KRT2	-5.90793	7.6e-17	ENSG00000172867
KRT222	-4.02845	3.63e-08	ENSG00000213424
KRT4	-8.11106	8.28e-14	ENSG00000170477
KRT8	-2.2199	0.0242149	ENSG00000170421
LA16c-329F2.1	-3.06879	0.00742239	ENSG00000261399
LA16c-390E6.5	-2.95247	4.37e-08	ENSG00000261641
LACC1	-2.2993	6.53e-07	ENSG00000179630
LAMP5	-2.28901	0.00498256	ENSG00000125869
LCMT1	-1.16172	6.46e-18	ENSG00000205629
LCORL	1.20548	4.1e-11	ENSG00000178177
LDHD	-1.74236	3.26e-08	ENSG00000166816
LDLRAD3	1.19017	4.49e-08	ENSG00000179241
LDOC1	-1.08488	0.00146289	ENSG00000182195
LFNG	1.27174	0.00291233	ENSG00000106003
LGI1	-2.68515	4.29e-11	ENSG00000108231
LGI4	-2.31947	0.000129929	ENSG00000153902
LHFPL3	2.35952	4.03e-10	ENSG00000187416
LHPP	-2.06301	0.000231575	ENSG00000107902
LHX6	-3.34972	1.04e-14	ENSG00000106852
LIMD1	1.64842	6.16e-22	ENSG00000144791
LIN28B	2.72117	4.02e-09	ENSG00000187772
LIN7B	-1.94963	2e-16	ENSG00000104863
LIN9	1.51881	2.17e-26	ENSG00000183814
LINC00237	2.23857	7.46e-11	ENSG00000225127
LINC00282	-2.92343	0.00118938	ENSG00000281106
LINC00320	-3.92102	8.36e-05	ENSG00000224924
LINC00463	-3.54262	1.29e-07	ENSG00000234056
LINC00499	-5.27072	1.5e-06	ENSG00000251372
LINC00511	1.73203	2.55e-28	ENSG00000227036
LINC00689	5.92674	6.71e-78	ENSG00000231419
LINC00706	-3.5841	3.92e-09	ENSG00000281186
LINC00839	1.77094	3.57e-08	ENSG00000185904
LINC00886	-1.51599	0.0153744	ENSG00000240875
LINC00891	-2.89037	4.19e-09	ENSG00000281852
LINC00900	-2.30056	1.01e-07	ENSG00000246100
LINC00925	1.93032	4.71e-08	ENSG00000255571
LINC00957	-1.39406	0.00476665	ENSG00000235314
LINC00997	1.27159	9.46e-08	ENSG00000281332
LINC01018	-1.50621	0.0016546	ENSG00000250056
LINC01106	-5.008	6.82e-18	ENSG00000175772
LINC01123	-3.81034	2.96e-07	ENSG00000204588
LINC01126	2.06792	3.64e-14	ENSG00000279873
LINC01140	-1.42431	5.36e-05	ENSG00000267272
LINC01141	1.6169	0.00386186	ENSG00000236963
LINC01166	-3.309	0.000297863	ENSG00000232903
LINC01234	2.22308	1.02e-07	ENSG00000249550
LINC01260	-2.75413	2.49e-12	ENSG00000132832
LINC01296	2.98643	8.06e-22	ENSG00000244306
LINC01299	-4.75071	0.000742082	ENSG00000254081
LINC01480	-2.1618	3.88e-05	ENSG00000270164
LINC01503	-1.8346	0.000472891	ENSG00000233901
LINC01551	-7.47474	1.34e-11	ENSG00000186960
LINC01561	1.5118	0.0231686	ENSG00000177234
LINC01579	2.31963	0.000469306	ENSG00000258754
LL0XNC01-16G2.1	-4.2196	8.37e-05	ENSG00000225110
LLNLF-173C4.2	-2.45375	3.5e-11	ENSG00000282416
LLNLF-187D8.1	-1.93235	0.000590466	ENSG00000277531
LLNLR-259H9.1	-4.03251	8.3e-07	ENSG00000280282
LMNB1	2.55887	4.28e-42	ENSG00000113368
LMNB2	1.27372	1.84e-19	ENSG00000176619
LMO1	2.26214	3.95e-08	ENSG00000166407
LMO3	-1.64747	0.00316143	ENSG00000048540
LOX	1.58587	0.00985119	ENSG00000113083
LOXL2	2.19462	1.9e-20	ENSG00000134013
LOXL3	1.57392	6.08e-22	ENSG00000115318
LPAR6	-1.60501	0.00417081	ENSG00000139679
LPIN3	-2.06832	5.62e-07	ENSG00000132793
LRFN4	1.11371	2.16e-09	ENSG00000173621
LRIG3	1.31347	5.41e-06	ENSG00000139263
LRMP	-1.2783	0.0134361	ENSG00000118308
LRP1	1.78255	1.54e-13	ENSG00000123384
LRP11	-1.50001	4.05e-15	ENSG00000120256
LRP5	1.51989	6.59e-08	ENSG00000162337
LRP6	1.69396	1.93e-21	ENSG00000070018
LRRC10B	-2.55329	0.000107795	ENSG00000204950
LRRC3	1.51117	0.000450184	ENSG00000160233
LRRC32	-2.27657	3.74e-07	ENSG00000137507
LRRC3B	-1.82021	0.00156984	ENSG00000179796
LRRC55	3.12478	1.28e-16	ENSG00000183908
LRRC58	1.10459	1.12e-15	ENSG00000163428
LRRC70	-1.47575	0.00273703	ENSG00000186105
LRRK2	1.49404	1.1e-10	ENSG00000188906
LRRN1	2.35003	2.36e-11	ENSG00000175928
LRRN2	1.5817	5.75e-14	ENSG00000170382
LTF	2.93757	1.26e-06	ENSG00000012223
LUZP2	2.03256	3.55e-05	ENSG00000187398
LY6E	-1.93448	3.06e-05	ENSG00000160932
LY6K	-2.1364	3.61e-08	ENSG00000160886
LY86-AS1	-5.21325	0.00684555	ENSG00000216863
LYPD3	-1.9788	1.86e-06	ENSG00000124466
LYPD6B	-2.63609	0.00776804	ENSG00000150556
LYRM9	-2.07023	1.57e-11	ENSG00000232859
LYSMD2	-1.31434	5.99e-10	ENSG00000140280
LYST	2.01268	7.07e-34	ENSG00000143669
MAD2L1	1.66728	0.000275102	ENSG00000164109
MAFB	2.10387	6.46e-17	ENSG00000204103
MAGED4	2.47967	3.23e-11	ENSG00000154545
MAGEE1	-1.75145	6.63e-06	ENSG00000198934
MAL	-3.7119	1.38e-09	ENSG00000172005
MAL2	-3.28357	1.65e-05	ENSG00000147676
MAML2	2.13775	8.62e-26	ENSG00000184384
MAMLD1	1.14554	1.47e-07	ENSG00000013619
MAN1A1	-1.33192	0.00205134	ENSG00000111885
MAOA	-1.63945	1.59e-06	ENSG00000189221
MAP10	1.60656	8.35e-07	ENSG00000212916
MAP1LC3A	-1.86319	1.22e-16	ENSG00000101460
MAP3K1	1.8241	6.31e-20	ENSG00000095015
MAP3K15	2.03468	0.000127816	ENSG00000180815
MAP3K2	1.11347	8.2e-28	ENSG00000169967
MAP3K5	-1.42104	1.51e-05	ENSG00000197442
MAP7	-1.78358	0.00306469	ENSG00000135525
MAPK3	-1.34644	1.23e-14	ENSG00000102882
MAPT-IT1	2.42309	1.33e-05	ENSG00000279685
2022-03-10	-2.87074	1.92e-06	ENSG00000173838
2022-03-11	-2.60863	0.00107654	ENSG00000183654
MARCKS	1.70871	1.89e-16	ENSG00000277443
MAST3	-1.10697	0.0246679	ENSG00000099308
MATK	-2.47978	3.13e-07	ENSG00000007264
MATN2	1.32035	0.0101659	ENSG00000132561
MB	-3.26073	1.16e-07	ENSG00000198125
MB21D1	1.43703	5.58e-07	ENSG00000164430
MC4R	-3.90157	6.52e-06	ENSG00000166603
MCM10	4.3201	1.58e-41	ENSG00000065328
MCM2	2.52662	3.45e-61	ENSG00000073111
MCM5	1.14686	1.3e-09	ENSG00000100297
MCM8	1.28665	2.66e-08	ENSG00000125885
MCTP1	-1.70076	0.00549926	ENSG00000175471
MDFI	4.03689	3.33e-88	ENSG00000112559
MDGA2	2.89633	1.13e-09	ENSG00000139915
MDH1	-1.71941	2.36e-11	ENSG00000014641
MED13L	1.60143	8.79e-19	ENSG00000123066
MED31	-1.07399	1.04e-12	ENSG00000108590
MEGF11	2.46879	1.68e-16	ENSG00000157890
MEIS1	1.2305	0.0169523	ENSG00000143995
MEIS3P2	1.54018	6.52e-06	ENSG00000188013
MELK	4.56975	3.34e-47	ENSG00000165304
MET	2.80923	0.000106029	ENSG00000105976
Metazoa_SRP	7.09557	4.37e-32	ENSG00000274012
Metazoa_SRP	6.10601	4.37e-32	ENSG00000274012
Metazoa_SRP	6.50789	0.0109305	ENSG00000278771
Metazoa_SRP	5.51833	0.0109305	ENSG00000278771
MEX3A	4.18931	5.5e-141	ENSG00000254726
MEX3B	2.98463	1.8e-57	ENSG00000183496
MEX3D	1.82813	7.73e-33	ENSG00000181588
MFAP2	3.69635	4.5e-17	ENSG00000117122
MFSD4	-1.85903	0.00112671	ENSG00000174514
MFSD7	-1.4151	2.67e-08	ENSG00000169026
MFSD9	1.05821	9.55e-10	ENSG00000135953
MGST1	-2.11768	0.0118377	ENSG00000008394
MGST2	-1.331	9.84e-07	ENSG00000085871
MGST3	-1.13069	6.45e-18	ENSG00000143198
MICA	-1.95204	2.02e-05	ENSG00000204520
MICAL2	-2.56276	1.43e-06	ENSG00000133816
MINOS1	-1.64584	3.4e-36	ENSG00000173436
MIR22HG	-2.33114	4.71e-05	ENSG00000186594
MIR7-3HG	-6.47313	1.87e-16	ENSG00000176840
MIRLET7BHG	2.8221	6.62e-18	ENSG00000197182
MKI67	6.06763	9.04e-47	ENSG00000148773
MKL1	1.06058	2.64e-12	ENSG00000196588
MKRN3	1.8827	6.09e-12	ENSG00000179455
MLXIPL	-2.43694	4.12e-08	ENSG00000009950
MMD	-1.57143	0.0014074	ENSG00000108960
MMP11	1.28115	5.21e-05	ENSG00000099953
MMP14	1.80848	8.79e-09	ENSG00000157227
MMP15	1.75342	2.9e-17	ENSG00000102996
MMP16	4.14147	1.49e-97	ENSG00000156103
MMP9	1.90732	0.00334564	ENSG00000100985
MMS22L	1.12093	5.58e-08	ENSG00000146263
MOAP1	-1.54593	1.54e-09	ENSG00000165943
MORN2	-1.28796	8.67e-11	ENSG00000188010
MOV10L1	-1.15743	0.000337262	ENSG00000073146
MPC1	-1.58298	9.63e-08	ENSG00000060762
MPP7	-2.12028	2.14e-09	ENSG00000150054
MPPED1	-3.82066	1.05e-08	ENSG00000186732
MRAS	-1.21734	1.03e-07	ENSG00000158186
MRC2	1.88258	2.09e-11	ENSG00000011028
MRO	-2.53585	1.97e-05	ENSG00000134042
MROH7	-1.3474	0.000998769	ENSG00000184313
MRPL22	-1.10226	3.33e-16	ENSG00000082515
MRPL41	-1.66402	3.72e-06	ENSG00000182154
MRPS18C	-1.18265	2.75e-19	ENSG00000163319
MRPS36	-1.56158	7.33e-29	ENSG00000134056
MRVI1	-2.13575	1.29e-06	ENSG00000072952
MSH5-SAPCD1	0.0373603	2.79e-05	ENSG00000255152
MSI1	1.63333	9.85e-10	ENSG00000135097
MSRB2	-1.21603	2.61e-13	ENSG00000148450
MSTN	3.09104	4.94e-42	ENSG00000138379
MT-ATP6	-2.53517	7.03e-09	ENSG00000198899
MT-ATP8	-1.86154	0.000606122	ENSG00000228253
MT-CO2	-2.47994	6.77e-09	ENSG00000198712
MT-CO3	-2.32989	9.74e-08	ENSG00000198938
MT-CYB	-2.12134	1.21e-05	ENSG00000198727
MT-ND1	-2.69816	7.72e-10	ENSG00000198888
MT-ND2	-2.83817	9.41e-13	ENSG00000198763
MT-ND3	-2.30511	1.66e-09	ENSG00000198840
MT-ND4	-1.76673	0.0104957	ENSG00000198886
MT-RNR1	-4.13058	8.71e-10	ENSG00000211459
MT-RNR2	-4.63688	6.8e-07	ENSG00000210082
MT1A	-5.0024	3e-15	ENSG00000205362
MT1E	-3.15619	6.87e-14	ENSG00000169715
MT1F	-1.66729	0.00137004	ENSG00000198417
MT1G	-3.85872	1.79e-15	ENSG00000125144
MT1L	-3.58269	3.34e-19	ENSG00000260549
MT1M	-3.18847	1.88e-16	ENSG00000205364
MT1X	-1.90268	0.000325294	ENSG00000187193
MT2A	-2.54362	2.28e-12	ENSG00000125148
MT3	-2.65511	3.92e-08	ENSG00000087250
MTIF3	-1.44181	4.57e-42	ENSG00000122033
MTND2P28	-3.14383	1.4e-11	ENSG00000225630
MTRNR2L8	-4.08683	0.000173157	ENSG00000255823
MTUS1	-1.46489	7.33e-06	ENSG00000129422
MTUS2	-2.21603	9.7e-07	ENSG00000132938
MURC	1.21504	2.33e-07	ENSG00000170681
MUSTN1	-4.02813	2.33e-09	ENSG00000272573
MYBL2	5.30349	2.87e-49	ENSG00000101057
MYBPC1	-2.68344	0.00413921	ENSG00000196091
MYC	2.72694	8.77e-28	ENSG00000136997
MYCL	1.79836	8.58e-15	ENSG00000116990
MYCN	2.03568	4.69e-17	ENSG00000134323
MYEOV2	-1.77316	1.24e-10	ENSG00000172428
MYH6	-3.27819	1.8e-09	ENSG00000197616
MYL12B	-1.50431	1.12e-17	ENSG00000118680
MYL2	-5.98578	2.67e-18	ENSG00000111245
MYL7	-2.14256	1.15e-05	ENSG00000106631
MYL9	-2.19715	0.0237407	ENSG00000101335
MYLK3	-3.08471	0.005118	ENSG00000140795
MYO15A	-2.63928	0.00218624	ENSG00000091536
MYO3A	-3.68384	0.000149618	ENSG00000095777
MYO5B	1.9629	6.77e-05	ENSG00000167306
MYO7B	3.20663	4.37e-14	ENSG00000169994
MYO9B	1.1018	1.77e-07	ENSG00000099331
MYOCD	-3.00157	0.00468398	ENSG00000141052
MYOT	-2.50276	2.37e-08	ENSG00000120729
MYT1	1.96983	2.91e-05	ENSG00000196132
MYT1L	-3.01426	1.56e-06	ENSG00000186487
N4BP2	2.21197	5.34e-25	ENSG00000078177
N6AMT2	-1.12964	1.37e-11	ENSG00000150456
NAA20	-1.11237	8.36e-17	ENSG00000173418
NAGPA	-1.38091	0.000254469	ENSG00000103174
NAP1L2	-1.7619	3.09e-05	ENSG00000186462
NAP1L5	-1.80272	8.6e-05	ENSG00000177432
NAPB	-2.24567	1.29e-05	ENSG00000125814
NAT16	2.64966	3.78e-11	ENSG00000167011
NAV1	1.89499	1.17e-10	ENSG00000134369
NAV2	2.08651	3.47e-23	ENSG00000166833
NAV2-AS1	0.143105	3.16e-05	ENSG00000254894
NBPF19	1.29454	2.42e-08	ENSG00000271383
NBPF26	1.25173	0.000263236	ENSG00000273136
NCAM1-AS1	1.39409	4.41e-05	ENSG00000227487
NCAN	1.98596	0.0095595	ENSG00000130287
NCAPD2	1.5304	3.23e-25	ENSG00000010292
NCAPG	4.43783	2.88e-51	ENSG00000109805
NCAPG2	1.46405	1.83e-18	ENSG00000146918
NCAPH	3.53502	2.11e-65	ENSG00000121152
NCDN	-2.51254	3.9e-05	ENSG00000020129
NCOA7	-1.39014	5.61e-09	ENSG00000111912
NCS1	-1.63677	0.00612937	ENSG00000107130
NDC80	4.55304	5.72e-45	ENSG00000080986
NDNF	3.03436	9.4e-13	ENSG00000173376
NDRG2	-1.88579	0.000703425	ENSG00000165795
NDUFA1	-1.57169	2.31e-15	ENSG00000125356
NDUFA12	-1.32339	2.19e-14	ENSG00000184752
NDUFA2	-1.52222	3.43e-14	ENSG00000131495
NDUFA4	-2.02484	1.13e-17	ENSG00000189043
NDUFA5	-1.75006	6.2e-11	ENSG00000128609
NDUFA8	-1.40183	3.27e-15	ENSG00000119421
NDUFAB1	-1.45705	3.83e-25	ENSG00000004779
NDUFAF3	-1.31323	1.09e-15	ENSG00000178057
NDUFB1	-1.85464	7.01e-38	ENSG00000183648
NDUFB2	-1.32168	5.58e-16	ENSG00000090266
NDUFB3	-1.35377	2.87e-19	ENSG00000119013
NDUFB6	-1.23486	1.23e-15	ENSG00000165264
NDUFB8	-1.57613	2.38e-26	ENSG00000166136
NDUFB9	-1.28861	2.31e-08	ENSG00000147684
NDUFC1	-1.4251	5.18e-23	ENSG00000109390
NDUFS3	-1.19381	4.72e-12	ENSG00000213619
NDUFS4	-1.08969	1.63e-11	ENSG00000164258
NDUFS5	-1.55554	1.91e-23	ENSG00000168653
NDUFV2	-1.06245	5.21e-19	ENSG00000178127
NEBL	-1.30809	6.11e-07	ENSG00000078114
NECAB1	-2.71069	8.97e-10	ENSG00000123119
NECAB2	-2.59232	3e-05	ENSG00000103154
NECAP1	-1.32548	2.43e-08	ENSG00000089818
NEDD4	1.47323	1.34e-15	ENSG00000069869
NEDD8	-1.50415	5.71e-28	ENSG00000129559
NEK2	4.32002	5.32e-50	ENSG00000117650
NES	2.45883	1.8e-28	ENSG00000132688
NEU4	1.41927	0.0050343	ENSG00000204099
NEURL1B	1.22318	0.00377055	ENSG00000214357
NEUROD6	-6.13191	1.58e-05	ENSG00000164600
NFE2L3	1.61959	3.03e-13	ENSG00000050344
NFIA-AS2	2.30193	1.03e-13	ENSG00000237928
NFIB	2.17349	1.27e-38	ENSG00000147862
NGB	-4.45784	7.12e-05	ENSG00000165553
NGFRAP1	-1.3359	2.93e-08	ENSG00000166681
NHLRC4	-2.74909	7.86e-05	ENSG00000257108
NHP2L1	-1.22462	1.39e-18	ENSG00000100138
NHSL2	-1.32698	0.0103508	ENSG00000204131
NID2	1.95316	2.49e-05	ENSG00000087303
NINJ2	-1.96506	0.0144349	ENSG00000171840
NKD1	2.27139	4.76e-13	ENSG00000140807
NKPD1	1.67064	3.57e-06	ENSG00000179846
NKX2-1	-10.8289	1.04e-10	ENSG00000136352
NKX2-2	1.62967	0.0159306	ENSG00000125820
NKX3-1	-1.98577	3.91e-07	ENSG00000167034
NKX6-1	3.66706	8.09e-16	ENSG00000163623
NLGN1	2.10193	6.16e-11	ENSG00000169760
NMB	1.37061	4.11e-05	ENSG00000197696
NME3	-1.11492	2.89e-08	ENSG00000103024
NME5	-2.14805	1.7e-06	ENSG00000112981
NMU	3.27464	1.95e-12	ENSG00000109255
NNMT	2.35895	5.36e-05	ENSG00000166741
NOS3	-2.44346	0.000414646	ENSG00000164867
NOSTRIN	-1.37393	0.00126958	ENSG00000163072
NOTCH1	2.56577	3.6e-53	ENSG00000148400
NOTUM	2.19274	3.18e-11	ENSG00000185269
NOVA1	1.38332	5.43e-17	ENSG00000139910
NOX4	2.34026	8.02e-10	ENSG00000086991
NOXA1	-1.79176	3.51e-10	ENSG00000188747
NPC2	-1.47413	8.87e-06	ENSG00000119655
NPM2	-1.93134	0.000708416	ENSG00000158806
NPNT	-3.58669	7.21e-07	ENSG00000168743
NPTN	-1.75334	3.18e-11	ENSG00000156642
NPW	3.3901	3.07e-17	ENSG00000183971
NPY	-5.4479	1.03e-10	ENSG00000122585
NQO1	-2.57214	1.86e-15	ENSG00000181019
NR0B1	2.00045	3.1e-07	ENSG00000169297
NR2E1	-6.51319	6.29e-14	ENSG00000112333
NR3C2	-2.34165	7.19e-19	ENSG00000151623
NR6A1	1.90944	1.45e-34	ENSG00000148200
NRAP	-2.24717	2e-07	ENSG00000197893
NRARP	2.04763	2.2e-24	ENSG00000198435
NRG4	-2.16648	6.62e-05	ENSG00000169752
NRGN	-5.24148	5.09e-12	ENSG00000154146
NRN1L	-2.06089	6.99e-07	ENSG00000188038
NRP2	1.62661	1.71e-06	ENSG00000118257
NRSN1	-3.17037	3.82e-08	ENSG00000152954
NRSN2	-1.11491	2.4e-07	ENSG00000125841
NSF	-1.35994	0.00220225	ENSG00000073969
NSUN7	1.79597	3.04e-08	ENSG00000179299
NT5DC1	-1.79013	2.68e-07	ENSG00000178425
NTN1	3.0838	1.19e-67	ENSG00000065320
NUDT14	-1.81227	3.97e-23	ENSG00000183828
NUDT7	-1.40827	1.38e-11	ENSG00000140876
NUDT8	-1.14712	5.26e-05	ENSG00000167799
NUF2	3.82334	3.77e-72	ENSG00000143228
NUP210	1.15875	2.84e-18	ENSG00000132182
NUSAP1	3.72617	6.52e-59	ENSG00000137804
NXF2B	-3.54621	4.2e-09	ENSG00000269437
NXPH4	2.41874	0.0111346	ENSG00000182379
NXT2	1.32592	0.0021327	ENSG00000101888
OAF	-1.73935	0.0121347	ENSG00000184232
OAT	-1.42291	1.6e-12	ENSG00000065154
OBSL1	1.19874	2.83e-07	ENSG00000124006
OGDHL	-2.46693	2.99e-06	ENSG00000197444
OLFM3	-3.22861	4.77e-06	ENSG00000118733
OLFML2B	1.54669	0.00123517	ENSG00000162745
OLIG2	2.2134	8.55e-07	ENSG00000205927
OMD	-2.70563	1.85e-05	ENSG00000127083
OPALIN	-6.00689	1.75e-06	ENSG00000197430
OPN4	-5.34341	1.11e-06	ENSG00000122375
OR7E14P	-1.63158	0.0208941	ENSG00000184669
ORC1	2.62723	3.48e-25	ENSG00000085840
OSBPL3	1.1452	3.15e-07	ENSG00000070882
OSCP1	-1.28281	7.63e-11	ENSG00000116885
OSR1	4.25265	3.39e-28	ENSG00000143867
OSTM1-AS1	-6.21313	8.95e-16	ENSG00000225174
OTOF	-3.1083	2.01e-05	ENSG00000115155
OTOS	-3.09492	0.000345247	ENSG00000178602
OTUB2	1.725	3.7e-05	ENSG00000089723
OTX1	-4.23542	1.05e-08	ENSG00000115507
OTX2	-4.73847	0.00141171	ENSG00000165588
P2RY2	-1.7427	0.00365703	ENSG00000175591
P3H4	1.07979	2.2e-08	ENSG00000141696
P4HA1	1.08278	7.37e-05	ENSG00000122884
PABPC1L2B-AS1	-2.27199	2.82e-05	ENSG00000226725
PABPC4L	3.02009	2.99e-29	ENSG00000254535
PABPC5	1.57101	7.15e-14	ENSG00000174740
PACSIN1	-3.31294	0.000141343	ENSG00000124507
PAG1	1.47383	1.28e-08	ENSG00000076641
PAH	-2.46507	4.59e-07	ENSG00000171759
PAIP2B	-2.02006	0.0217579	ENSG00000124374
PAK6	-2.31261	5.48e-05	ENSG00000137843
PALMD	-1.97404	9.28e-05	ENSG00000099260
PAPL	-3.80991	2.77e-05	ENSG00000183760
PAPLN	-2.2309	0.00213466	ENSG00000100767
PAPPA2	2.74153	4.72e-26	ENSG00000116183
PAQR5	-1.33163	0.00300508	ENSG00000137819
PARD6A	-1.3983	1.09e-07	ENSG00000102981
PARD6G	2.3331	1.66e-26	ENSG00000178184
PARM1	-1.7268	0.00517754	ENSG00000169116
PARPBP	1.70705	0.0247721	ENSG00000185480
PARVB	-1.16715	1.09e-05	ENSG00000188677
PAX3	5.59647	3.05e-15	ENSG00000135903
PBK	5.48017	1.14e-45	ENSG00000168078
PBX3	1.52534	2.61e-07	ENSG00000167081
PCBP3-OT1	1.30206	0.0205469	ENSG00000280604
PCDH15	2.14612	0.000124182	ENSG00000150275
PCDH18	1.40081	8.77e-08	ENSG00000189184
PCDHA2	1.68977	3.26e-10	ENSG00000204969
PCDHB10	1.76314	8.09e-28	ENSG00000120324
PCDHB14	1.49422	1.24e-13	ENSG00000120327
PCDHB16	1.53193	4.9e-08	ENSG00000272674
PCDHB17P	2.10746	5.07e-24	ENSG00000255622
PCDHB18P	2.59602	7.86e-26	ENSG00000146001
PCDHB2	2.49235	3.1e-37	ENSG00000112852
PCDHB3	2.84797	6.76e-21	ENSG00000113205
PCDHB5	1.22411	3.55e-07	ENSG00000113209
PCDHB8	2.40957	7.87e-20	ENSG00000120322
PCDHB9	2.36715	1.19e-34	ENSG00000177839
PCDHGA8	3.87911	5.68e-19	ENSG00000253767
PCDHGA9	1.45802	0.00138551	ENSG00000261934
PCDHGB2	2.26732	6.35e-19	ENSG00000253910
PCK1	-3.1557	0.000125822	ENSG00000124253
PCP4	-3.22992	0.0157574	ENSG00000183036
PCP4L1	-3.01542	9.66e-06	ENSG00000248485
PDE1A	-2.368	6.74e-07	ENSG00000115252
PDE1B	-3.34782	1.08e-07	ENSG00000123360
PDE2A	-2.15959	0.000172319	ENSG00000186642
PDGFRA	3.77089	1.2e-37	ENSG00000134853
PDGFRL	-1.9639	1.16e-05	ENSG00000104213
PDK1	1.82807	6.52e-14	ENSG00000152256
PDLIM4	-3.94888	5.43e-16	ENSG00000131435
PDYN	-6.70315	8.21e-10	ENSG00000101327
PDZRN3	1.74261	2.47e-18	ENSG00000121440
PEBP1	-1.64286	1.17e-17	ENSG00000089220
PEBP4	-2.59571	8.7e-07	ENSG00000134020
PEX11G	-1.3676	0.00113704	ENSG00000104883
PFDN5	-1.26148	5.44e-19	ENSG00000123349
PFKFB2	1.3324	1.72e-07	ENSG00000123836
PGAP1	1.35324	1.09e-12	ENSG00000197121
PGC	-5.12552	3.76e-11	ENSG00000096088
PGF	1.15638	0.0245892	ENSG00000119630
PGR	-3.42233	3.8e-13	ENSG00000082175
PHF11	-2.23945	9.58e-18	ENSG00000136147
PHF24	-1.81405	0.0315343	ENSG00000122733
PHLDA1	1.71608	1.66e-14	ENSG00000139289
PHYH	-1.1459	1.49e-10	ENSG00000107537
PHYHD1	-1.38071	0.00143209	ENSG00000175287
PHYHIP	-2.85405	2.77e-08	ENSG00000168490
PIF1	2.49607	3.03e-23	ENSG00000140451
PIGM	1.46768	1.58e-14	ENSG00000143315
PIK3R2	1.16742	9.65e-06	ENSG00000105647
PIP4K2A	-1.51454	0.00256331	ENSG00000150867
PIP5K1B	-2.5562	9e-13	ENSG00000107242
PIPOX	-1.65657	0.00993773	ENSG00000179761
PIR	-2.01744	1.04e-14	ENSG00000087842
PITHD1	-1.3489	4.03e-13	ENSG00000057757
PKD1L2	-2.34251	7.58e-06	ENSG00000166473
PKD1P1	1.57174	0.0152804	ENSG00000244257
PKD1P6	1.35018	9.29e-06	ENSG00000270580
PKD1P6	1.58881	6.64e-11	ENSG00000250251
PKIG	-1.10107	4e-05	ENSG00000168734
PKMYT1	2.37289	1.07e-22	ENSG00000127564
PKNOX2	1.08709	7.93e-05	ENSG00000165495
PLA1A	-5.56932	1.74e-09	ENSG00000144837
PLA2G16	-1.53387	2.23e-06	ENSG00000176485
PLA2G4C	-1.03427	0.00969119	ENSG00000105499
PLAC4	5.03428	7.53e-21	ENSG00000280109
PLAG1	2.24692	2.07e-17	ENSG00000181690
PLEKHA8	1.23284	4.74e-11	ENSG00000106086
PLEKHB1	-1.72595	0.00648481	ENSG00000021300
PLEKHG2	1.29009	3.33e-06	ENSG00000090924
PLEKHG4	2.06476	4.19e-18	ENSG00000196155
PLK1	1.76099	3.48e-23	ENSG00000166851
PLK2	-2.24268	4.45e-05	ENSG00000145632
PLK4	1.86798	6.51e-14	ENSG00000142731
PLK5	-2.91847	1.73e-06	ENSG00000185988
PLOD1	1.42583	3.15e-14	ENSG00000083444
PLOD3	1.2765	7.13e-05	ENSG00000106397
PLXNA1	1.21388	1.34e-09	ENSG00000114554
PNLIP	-7.997	6.98e-06	ENSG00000175535
PNMA5	-4.85702	1.58e-10	ENSG00000198883
PNOC	-3.36929	0.0047905	ENSG00000168081
PNP	-1.78686	0.00559077	ENSG00000198805
PNPLA4	-2.35165	7.35e-13	ENSG00000006757
PNPLA5	-3.57378	3.01e-05	ENSG00000100341
POC1A	1.48492	3.02e-22	ENSG00000164087
POLB	-1.24443	2.98e-07	ENSG00000070501
POLD4	-1.06877	0.00402119	ENSG00000175482
POLH	1.51112	3.43e-21	ENSG00000170734
POLQ	4.01427	3.58e-54	ENSG00000051341
POLR2I	-1.53359	1.05e-09	ENSG00000105258
POLR2J2	1.87834	1.14e-11	ENSG00000228049
POMK	3.17156	1.87e-23	ENSG00000185900
POMP	-1.71086	1.94e-22	ENSG00000132963
PON3	-2.4221	5.31e-06	ENSG00000105852
POSTN	2.71335	5.6e-05	ENSG00000133110
POU2AF1	-2.79077	9.77e-06	ENSG00000110777
POU3F2	1.31524	0.00181673	ENSG00000184486
PPCS	-1.28162	2.38e-24	ENSG00000127125
PPM1H	-1.47271	0.011257	ENSG00000111110
PPP1R14A	-2.65717	2.53e-07	ENSG00000167641
PPP1R14BP3	1.58199	7.23e-11	ENSG00000179967
PPP1R1B	-2.42998	0.0244411	ENSG00000131771
PPP1R36	-1.58502	0.0171986	ENSG00000165807
PPP1R3E	-1.34499	2.06e-06	ENSG00000235194
PPP1R7	-1.24041	3.24e-13	ENSG00000115685
PPP2R2C	-2.1119	2.3e-05	ENSG00000074211
PPP2R3B	1.65364	6.89e-09	ENSG00000167393
PPP4R4	-1.6513	0.00465013	ENSG00000119698
PRB2	-3.77191	0.000650195	ENSG00000121335
PRC1	2.5404	1.38e-47	ENSG00000198901
PRCD	-1.92751	0.000174807	ENSG00000214140
PRDX5	-1.19319	1.27e-11	ENSG00000126432
PRICKLE1	1.40703	0.00117224	ENSG00000139174
PRIM1	1.39367	1.63e-12	ENSG00000198056
PRKAA2	1.26655	1.44e-13	ENSG00000162409
PRKAR2B	-1.56245	2.58e-05	ENSG00000005249
PRKCDBP	-2.15647	0.000688486	ENSG00000170955
PRKCG	-3.40748	0.0004845	ENSG00000126583
PRKCZ	-1.64435	0.000113715	ENSG00000067606
PRKXP1	1.82507	3.55e-05	ENSG00000259205
PRL	-8.75123	0.00114316	ENSG00000172179
PRLHR	-3.08174	0.00947455	ENSG00000119973
PRMT8	-3.4478	2.67e-05	ENSG00000111218
PROCR	-1.60972	0.0184446	ENSG00000101000
PROM1	2.83256	6.61e-30	ENSG00000007062
PROSER2-AS1	-2.41723	2.82e-09	ENSG00000225778
PROX1	2.04809	1.44e-09	ENSG00000117707
PRR11	3.18246	7.56e-37	ENSG00000068489
PRR13	-1.48163	6.97e-24	ENSG00000205352
PRR26	3.03605	4.65e-10	ENSG00000180525
PRR29	-1.98787	0.00365291	ENSG00000224383
PRR5	-1.22298	5.05e-06	ENSG00000186654
PRRT1	-1.49774	0.000193277	ENSG00000204314
PRRX1	1.25687	1.59e-06	ENSG00000116132
PRSS1	-9.01617	5.51e-09	ENSG00000204983
PRSS12	1.6692	0.000139314	ENSG00000164099
PRSS2	-9.41732	5.86e-12	ENSG00000275896
PRSS3	-3.30343	7.27e-10	ENSG00000010438
PRTG	1.36108	0.00394201	ENSG00000166450
PSD	-2.90201	3.86e-09	ENSG00000059915
PSMA3	-1.46121	2.7e-12	ENSG00000100567
PSMA6	-1.04578	7.75e-06	ENSG00000100902
PSMB10	-1.64948	1.11e-12	ENSG00000205220
PSMD6-AS2	2.07751	0.00120569	ENSG00000239653
PSME1	-1.34807	1.9e-09	ENSG00000092010
PSME2	-1.42263	0.00238357	ENSG00000100911
PSME2P2	-2.94208	5.15e-10	ENSG00000225131
PTAR1	1.42045	2.69e-15	ENSG00000188647
PTCH1	1.7341	2.11e-14	ENSG00000185920
PTER	-2.47122	0.0014004	ENSG00000165983
PTGDS	-2.19905	0.000345927	ENSG00000107317
PTGES3L	-1.41277	0.0240974	ENSG00000267060
PTGFRN	2.17759	2.31e-37	ENSG00000134247
PTK7	1.87139	3.48e-11	ENSG00000112655
PTPN5	-2.97624	4.48e-05	ENSG00000110786
PTPRN	-2.15286	0.0173784	ENSG00000054356
PTPRR	-3.83057	3.25e-10	ENSG00000153233
PTPRS	2.15019	1.35e-35	ENSG00000105426
PTPRZ1	2.09463	1.34e-16	ENSG00000106278
PTRHD1	-1.37613	2.13e-06	ENSG00000184924
PTS	-1.41896	1.36e-16	ENSG00000150787
PTTG1	1.87219	3.91e-07	ENSG00000164611
PVRL3	1.59646	1.5e-08	ENSG00000177707
PVT1	3.13145	1.47e-38	ENSG00000249859
PXDN	2.61039	8.69e-43	ENSG00000130508
PXYLP1	1.738	7.97e-28	ENSG00000155893
PYCR1	1.28018	7.62e-05	ENSG00000183010
PYDC1	-5.05641	8.7e-14	ENSG00000169900
PYGO1	1.33607	3.09e-16	ENSG00000171016
PYURF	-1.51913	2.35e-18	ENSG00000145337
PZP	-2.90691	0.000401934	ENSG00000126838
QDPR	-2.46546	0.000124724	ENSG00000151552
RAB11FIP1P1	2.11496	4.19e-09	ENSG00000228492
RAB26	-2.45118	0.000185221	ENSG00000167964
RAB34	-2.77858	3.38e-15	ENSG00000109113
RAB39A	2.70671	1.01e-18	ENSG00000179331
RAB3A	-2.39385	1.3e-05	ENSG00000105649
RAB40B	-2.4036	1.75e-07	ENSG00000141542
RAB4B	-1.36309	1.45e-16	ENSG00000167578
RACGAP1	1.82617	7.77e-30	ENSG00000161800
RAD51	2.81582	8.85e-46	ENSG00000051180
RAD51AP1	2.08457	6.58e-14	ENSG00000111247
RAD54B	1.31938	4.61e-09	ENSG00000197275
RAD54L	1.51473	3.54e-08	ENSG00000085999
RAET1E-AS1	1.90652	0.00761926	ENSG00000268592
RALGPS2	1.28571	4.06e-15	ENSG00000116191
RAMP2-AS1	1.60526	1.04e-14	ENSG00000197291
RANBP17	1.31139	0.00224528	ENSG00000204764
RANBP3L	-1.92792	0.00895857	ENSG00000164188
RAP1GAP	-1.67104	0.00525933	ENSG00000076864
RAPGEF3	-1.72026	0.000200801	ENSG00000079337
RAPGEF4	-2.20523	0.00626116	ENSG00000091428
RAPGEFL1	-1.82881	0.000119915	ENSG00000108352
RARA	1.32019	5.96e-10	ENSG00000131759
RARRES2	-1.96974	2.06e-05	ENSG00000106538
RARRES3	-2.21346	6.31e-08	ENSG00000133321
RASA4	1.07326	4.2e-05	ENSG00000105808
RASAL1	-3.34536	2.37e-11	ENSG00000111344
RASD2	-2.74916	0.000368868	ENSG00000100302
RASGRF2	-1.89112	1.92e-08	ENSG00000113319
RASL11A	-1.67959	1.43e-06	ENSG00000122035
RAVER1	1.46719	2e-28	ENSG00000161847
RBFOX1	-2.5627	0.000308349	ENSG00000078328
RBFOX3	-2.70263	4.75e-05	ENSG00000167281
RBM12B	1.85825	1.85e-32	ENSG00000183808
RBM14-RBM4	1.20021	1.93e-12	ENSG00000248643
RBM15	2.43218	2.26e-16	ENSG00000162775
RBM20	2.74424	1.72e-17	ENSG00000203867
RBP4	-3.09012	1.85e-12	ENSG00000138207
RBP7	-3.63326	6.91e-15	ENSG00000162444
RBX1	-1.54982	1.47e-22	ENSG00000100387
RCAN2	-1.9386	1.36e-07	ENSG00000172348
RCC1	1.38142	3.6e-06	ENSG00000180198
RCC2	1.3854	3.15e-24	ENSG00000179051
RCOR2	2.95781	7.54e-41	ENSG00000167771
RECQL4	1.47473	0.00130494	ENSG00000160957
REEP6	-1.72288	2.95e-05	ENSG00000115255
RERG	-2.19603	2.32e-05	ENSG00000134533
RERGL	-2.50276	1.48e-07	ENSG00000111404
RESP18	-4.4121	3.96e-08	ENSG00000182698
RFX3	1.62196	2.55e-20	ENSG00000080298
RFX3-AS1	1.2276	0.00239015	ENSG00000232104
RGMA	2.04543	1.22e-21	ENSG00000182175
RGMB-AS1	1.92979	2.7e-07	ENSG00000246763
RGN	-1.33587	0.0022211	ENSG00000130988
RGS14	-3.905	1.47e-07	ENSG00000169220
RGS17	1.34011	0.00436656	ENSG00000091844
RGS20	-3.28119	3.28e-09	ENSG00000147509
RGS4	-3.29052	2.46e-09	ENSG00000117152
RGS5	-0.287265	1.32e-07	ENSG00000143248
RGS5	-1.92833	3.37e-06	ENSG00000143248
RGS7	-2.34315	5.66e-06	ENSG00000182901
RHBDL1	-1.90217	0.00793188	ENSG00000103269
RHCG	0.194859	0.0161964	ENSG00000140519
RHOD	-3.83493	2.74e-17	ENSG00000173156
RHOV	-1.56251	0.00472407	ENSG00000104140
RILP	-1.69347	3.7e-24	ENSG00000167705
RIPPLY2	-1.44021	6.6e-05	ENSG00000203877
RLTPR	-3.07421	2.32e-09	ENSG00000159753
RMRP	8.12	6.14e-10	ENSG00000277027
RMRP	7.3841	6.14e-10	ENSG00000277027
RN7SK	7.0797	2.47e-28	ENSG00000202198
RN7SL1	7.28323	9.55e-21	ENSG00000276168
RNA5-8S5	2.44439	0.00686272	ENSG00000278189
RNA5-8S5	2.44439	0.00686272	ENSG00000278189
RNA5-8S5	2.44439	0.00686272	ENSG00000278189
RNA5-8S5	2.44439	0.00686272	ENSG00000278189
RNA5-8S5	2.44439	0.00686272	ENSG00000277739
RNA5-8S5	2.44439	0.00686272	ENSG00000277739
RNA5-8S5	2.44439	0.00686272	ENSG00000277739
RNA5-8S5	2.44439	0.00686272	ENSG00000277739
RNA5-8S5	2.44439	0.00686272	ENSG00000278233
RNA5-8S5	2.44439	0.00686272	ENSG00000278233
RNA5-8S5	2.44439	0.00686272	ENSG00000278233
RNA5-8S5	2.44439	0.00686272	ENSG00000278233
RNA5-8S5	2.44439	0.00686272	ENSG00000275215
RNA5-8S5	2.44439	0.00686272	ENSG00000275215
RNA5-8S5	2.44439	0.00686272	ENSG00000275215
RNA5-8S5	2.44439	0.00686272	ENSG00000275215
RNASE1	-1.7196	0.000919348	ENSG00000129538
RNASEK	-1.55619	3.17e-24	ENSG00000219200
RNF122	1.39782	0.00919805	ENSG00000133874
RNF144A-AS1	-1.74903	0.00230556	ENSG00000228203
RNF165	1.5609	0.000263828	ENSG00000141622
RNF169	1.78107	9.65e-12	ENSG00000166439
RNF181	-1.25358	1.66e-15	ENSG00000168894
RNF182	1.48232	0.00408545	ENSG00000180537
RNF2	1.38926	1.86e-22	ENSG00000121481
RNF208	-1.56738	0.00141825	ENSG00000212864
RNF212	-3.31418	1.49e-16	ENSG00000178222
ROBO1	1.90169	1.88e-17	ENSG00000169855
ROCK1P1	-2.13139	0.00220638	ENSG00000263006
ROGDI	-1.93206	0.000251704	ENSG00000067836
ROR1	1.70693	0.00528108	ENSG00000185483
ROR2	2.14401	5.47e-09	ENSG00000169071
RP1-140K8.5	4.39579	7.37e-36	ENSG00000260604
RP1-168L15.6	-1.32865	0.00826139	ENSG00000280057
RP1-179N16.6	-1.16434	0.0129761	ENSG00000246982
RP1-198K11.5	0.325371	0.00552172	ENSG00000275457
RP1-244F24.1	-1.67674	8.46e-05	ENSG00000271857
RP1-257A7.4	1.3792	3.61e-09	ENSG00000215022
RP1-257A7.5	-3.98157	1.39e-17	ENSG00000272379
RP1-261G23.7	2.0334	0.000566393	ENSG00000272114
RP1-317E23.3	1.39143	3.09e-09	ENSG00000228172
RP1-40E16.9	-2.82207	0.00107482	ENSG00000230269
RP1-79C4.4	3.21286	4.86e-25	ENSG00000271811
RP11-100M12.3	-5.68834	3.82e-11	ENSG00000259168
RP11-1017G21.6	-1.93157	8.33e-13	ENSG00000272444
RP11-1023L17.2	4.6151	1.08e-23	ENSG00000215156
RP11-1026M7.2	-3.87557	8.52e-09	ENSG00000249109
RP11-104H15.10	2.01045	3.23e-05	ENSG00000272884
RP11-106M7.1	-2.85497	5.98e-07	ENSG00000228484
RP11-108M9.4	-1.42616	0.00677589	ENSG00000238142
RP11-1099M24.6	1.3375	1.91e-07	ENSG00000280046
RP11-10N23.2	1.30713	7.25e-09	ENSG00000253854
RP11-1100L3.7	-7.11022	9.36e-40	ENSG00000257663
RP11-1100L3.8	-3.15756	2.77e-05	ENSG00000259884
RP11-1114A5.4	1.69211	5.25e-29	ENSG00000232611
RP11-118K6.3	-1.5684	0.000996231	ENSG00000273001
RP11-121L10.2	2.01323	1.33e-09	ENSG00000280367
RP11-1263C18.1	-3.19563	2.06e-09	ENSG00000273238
RP11-1277A3.2	2.04878	5.5e-09	ENSG00000246596
RP11-127B20.2	-3.10711	1.34e-08	ENSG00000273156
RP11-129M16.4	-1.70724	5.59e-06	ENSG00000277879
RP11-12A20.4	1.85337	5.3e-08	ENSG00000278134
RP11-12A20.7	1.63757	6.61e-05	ENSG00000274911
RP11-1319K7.1	1.42323	4.45e-05	ENSG00000179978
RP11-131L12.4	-1.87591	4.28e-09	ENSG00000275409
RP11-136C24.3	2.03995	2.57e-25	ENSG00000273291
RP11-1406H17.1	-2.4008	6.1e-07	ENSG00000269908
RP11-1415C14.3	2.09883	9.23e-06	ENSG00000253816
RP11-146D12.2	2.49784	6.98e-19	ENSG00000240240
RP11-159D12.5	-1.60862	1.8e-07	ENSG00000266086
RP11-15E1.5	1.45827	0.00652897	ENSG00000274893
RP11-161H23.9	3.01122	1.37e-11	ENSG00000258334
RP11-168O16.1	1.47823	0.00517762	ENSG00000229191
RP11-16P20.4	2.71843	1.4e-29	ENSG00000279302
RP11-173C1.1	-1.69969	1.74e-06	ENSG00000269210
RP11-176H8.1	-0.094706	1.13e-09	ENSG00000203546
RP11-188C12.2	2.40566	4.98e-18	ENSG00000255585
RP11-192H23.6	-3.24072	2.7e-21	ENSG00000265287
RP11-192H23.8	-2.36204	2.72e-09	ENSG00000264608
RP11-196E1.3	-2.179	0.0179778	ENSG00000254561
RP11-196G18.22	1.25212	0.00629302	ENSG00000261716
RP11-196G18.3	1.16737	0.00226852	ENSG00000233030
RP11-19P22.8	-3.97626	1.99e-10	ENSG00000266872
RP11-203B9.4	1.5936	2.61e-08	ENSG00000226803
RP11-209D14.2	-1.19009	0.0209947	ENSG00000261033
RP11-20D14.6	-2.20664	3.46e-05	ENSG00000249790
RP11-20G6.1	-5.10416	0.00303226	ENSG00000280400
RP11-20I23.5	2.08024	1.98e-05	ENSG00000279568
RP11-211G3.2	2.7801	0.011584	ENSG00000223401
RP11-21L23.2	1.71559	0.000129046	ENSG00000261578
RP11-227B21.2	-5.53958	1.17e-15	ENSG00000255686
RP11-22B23.1	1.78369	0.00673996	ENSG00000111788
RP11-231P20.2	-2.1108	1.18e-11	ENSG00000236155
RP11-247C2.2	-2.76927	1.72e-06	ENSG00000248540
RP11-24N18.1	-4.2197	1.42e-17	ENSG00000260570
RP11-262H14.5	2.33259	7.47e-08	ENSG00000229422
RP11-269C23.5	-1.54869	0.00175111	ENSG00000277831
RP11-274B21.12	1.72117	4.39e-13	ENSG00000229413
RP11-274B21.4	1.2936	6.75e-09	ENSG00000230715
RP11-277P12.20	2.1122	2.1e-14	ENSG00000245648
RP11-284F21.10	3.07772	4.01e-29	ENSG00000272405
RP11-284F21.7	3.72594	2.21e-50	ENSG00000229953
RP11-285F16.1	-1.80378	0.00498491	ENSG00000273030
RP11-285F7.2	-1.76347	4.04e-05	ENSG00000242861
RP11-286B14.1	-5.75463	2.59e-05	ENSG00000228971
RP11-288H12.3	1.23393	8.86e-07	ENSG00000213073
RP11-293M10.6	-1.5945	1.87e-05	ENSG00000259319
RP11-295K3.1	1.70217	1.55e-07	ENSG00000250644
RP11-295M3.4	-4.40037	5.08e-05	ENSG00000277639
RP11-298I3.5	-1.95896	0.00699345	ENSG00000259132
RP11-2E11.9	1.74282	0.000418271	ENSG00000270953
RP11-303E16.8	-1.41186	3.39e-12	ENSG00000260643
RP11-315O6.1	-1.96041	0.000266718	ENSG00000255337
RP11-320H14.1	-3.51925	2.49e-05	ENSG00000260878
RP11-324O2.3	-1.66738	2.9e-06	ENSG00000232934
RP11-326G21.1	-2.46243	6.15e-08	ENSG00000272755
RP11-331F4.5	2.59711	8.31e-19	ENSG00000280152
RP11-332M2.1	-1.1481	0.000371337	ENSG00000203644
RP11-333E1.2	-1.43228	5.76e-06	ENSG00000263164
RP11-334C17.3	1.27898	1.47e-08	ENSG00000279259
RP11-343C2.12	-3.04857	3.46e-15	ENSG00000272617
RP11-346C20.3	-2.93389	2.62e-07	ENSG00000271009
RP11-350N15.4	1.56082	0.00448634	ENSG00000255201
RP11-358L22.3	-1.29134	0.00107955	ENSG00000276007
RP11-361L15.3	-3.50747	9.1e-35	ENSG00000280416
RP11-361L15.5	-3.5117	2.24e-09	ENSG00000280334
RP11-366L20.2	2.19156	0.0241145	ENSG00000197301
RP11-374M1.2	1.91264	6.4e-10	ENSG00000231527
RP11-384F7.2	2.32758	0.00263014	ENSG00000239268
RP11-385G16.1	-2.53169	0.000666662	ENSG00000274682
RP11-386G11.10	-2.75261	0.00384076	ENSG00000258017
RP11-392E22.9	-3.61207	0.00245917	ENSG00000273170
RP11-392P7.6	-1.70291	8.11e-07	ENSG00000247498
RP11-394O4.5	-3.02656	0.00220677	ENSG00000269936
RP11-401P9.4	1.28785	1.62e-06	ENSG00000261685
RP11-401P9.5	1.87866	9.84e-12	ENSG00000260249
RP11-407N17.5	-1.32704	0.000155776	ENSG00000258940
RP11-416I2.1	-6.23955	2.99e-13	ENSG00000260328
RP11-417L19.5	2.52992	1.13e-13	ENSG00000279283
RP11-423P10.2	1.57386	0.00021146	ENSG00000272054
RP11-424M24.5	-3.15227	0.000214839	ENSG00000262890
RP11-425L10.1	-1.39889	4.4e-08	ENSG00000244313
RP11-429A20.4	-2.25155	0.0108012	ENSG00000256654
RP11-429B14.4	2.77405	1.45e-18	ENSG00000261478
RP11-429J17.2	1.31301	6.24e-09	ENSG00000181097
RP11-430B1.2	-1.73684	6.24e-08	ENSG00000259577
RP11-434B12.1	-2.57153	4.48e-05	ENSG00000260837
RP11-436D23.1	-2.61493	0.000314332	ENSG00000271860
RP11-436K8.1	3.18589	1.5e-30	ENSG00000231252
RP11-438J1.1	3.84407	1.01e-11	ENSG00000272410
RP11-443B20.1	2.06009	2.25e-36	ENSG00000271936
RP11-44N21.1	-2.7684	1.39e-17	ENSG00000257556
RP11-452L6.5	1.98969	7.82e-21	ENSG00000260267
RP11-456P18.2	1.55032	0.000140779	ENSG00000229808
RP11-45P15.4	-1.6775	2.94e-05	ENSG00000259775
RP11-466H18.1	-3.03567	2.04e-50	ENSG00000244398
RP11-46H11.11	2.14927	1.64e-14	ENSG00000278949
RP11-472B18.1	1.08136	0.000125774	ENSG00000224097
RP11-474D14.2	2.12835	0.0026774	ENSG00000226318
RP11-479O17.9	-2.96721	0.010602	ENSG00000280259
RP11-47A8.5	2.00103	2.51e-09	ENSG00000272933
RP11-480I12.5	2.43275	1.01e-17	ENSG00000214796
RP11-482M8.3	-4.00113	1.51e-10	ENSG00000269935
RP11-490M8.1	-3.07168	1.07e-14	ENSG00000260025
RP11-495P10.10	1.51636	0.00624264	ENSG00000225871
RP11-497E19.1	-2.14604	0.0115459	ENSG00000205562
RP11-4B16.4	2.09828	1.5e-16	ENSG00000278330
RP11-503P10.1	-1.30359	0.00280508	ENSG00000272056
RP11-506F3.1	-3.25225	8.66e-14	ENSG00000282033
RP11-506K6.4	2.74807	9.74e-17	ENSG00000272320
RP11-50D9.3	2.06589	0.000303287	ENSG00000261668
RP11-513I15.6	-3.26626	0.000105683	ENSG00000225339
RP11-521B24.5	-2.43511	6.13e-08	ENSG00000257270
RP11-527D7.1	-2.13403	0.00819254	ENSG00000225554
RP11-536C12.1	1.51634	0.00013853	ENSG00000279254
RP11-536C5.7	2.29573	9.67e-07	ENSG00000227741
RP11-539L10.3	-1.66623	8.86e-05	ENSG00000251580
RP11-54D18.2	-1.47051	0.00390029	ENSG00000215237
RP11-557H15.4	-2.32939	0.000246245	ENSG00000232310
RP11-561C5.4	1.6512	2.62e-10	ENSG00000229212
RP11-566K11.4	-2.93282	0.000149508	ENSG00000259006
RP11-568K15.1	-1.31421	0.00476763	ENSG00000242193
RP11-571L19.8	-1.17406	0.00302983	ENSG00000272777
RP11-572P18.1	-5.67785	5.03e-120	ENSG00000220842
RP11-573G6.6	-2.46597	8.99e-08	ENSG00000261671
RP11-586D19.1	-1.70974	0.00620228	ENSG00000249896
RP11-588H23.3	-1.17848	0.00116058	ENSG00000258168
RP11-589M4.1	-2.67816	1.33e-07	ENSG00000259049
RP11-5C23.1	-1.47366	2.93e-08	ENSG00000272760
RP11-5P18.5	-3.3305	5.15e-07	ENSG00000233078
RP11-605F22.1	-3.4281	3.33e-13	ENSG00000259385
RP11-615I2.2	2.21031	1.86e-09	ENSG00000260577
RP11-617F23.1	-1.43102	0.0295569	ENSG00000259291
RP11-618K13.2	-3.96074	7.28e-05	ENSG00000255498
RP11-638I2.6	-4.31376	2.3e-08	ENSG00000258504
RP11-641D5.1	-0.564086	0.000734276	ENSG00000213178
RP11-660L16.2	-1.12383	0.00834009	ENSG00000254682
RP11-671J11.5	-1.7702	2.18e-10	ENSG00000279423
RP11-680G24.4	1.85543	1.78e-06	ENSG00000261819
RP11-689P11.2	-1.97391	7.48e-05	ENSG00000205959
RP11-68I18.10	1.7792	7.43e-08	ENSG00000261168
RP11-705C15.3	2.10345	5.49e-09	ENSG00000257027
RP11-706O15.1	1.76162	9.18e-08	ENSG00000205664
RP11-70L8.4	1.84867	3.31e-07	ENSG00000265194
RP11-710C12.1	-1.89601	3.71e-05	ENSG00000271474
RP11-722G7.1	1.22491	0.001155	ENSG00000269226
RP11-726G1.1	1.95826	5.3e-09	ENSG00000214776
RP11-728G15.1	-3.1777	6.62e-07	ENSG00000256008
RP11-746M1.1	-4.54507	1.77e-10	ENSG00000263986
RP11-766N7.3	-2.65262	7.6e-05	ENSG00000255693
RP11-776H12.1	2.98841	1.28e-19	ENSG00000226476
RP11-78O7.2	-1.8543	0.000127173	ENSG00000270091
RP11-793H13.8	1.90437	3.35e-16	ENSG00000257379
RP11-797H7.1	2.02714	5.6e-06	ENSG00000234338
RP11-7F17.8	-1.40663	0.000205739	ENSG00000273729
RP11-800A3.4	-2.14002	2.93e-05	ENSG00000260401
RP11-802O23.3	-2.64362	6.97e-08	ENSG00000272182
RP11-805J14.5	-3.89604	9.08e-12	ENSG00000254721
RP11-810M2.2	-2.36134	2.05e-14	ENSG00000263165
RP11-815I9.4	1.9621	3.89e-17	ENSG00000264885
RP11-817I4.2	1.69557	3.65e-15	ENSG00000276115
RP11-81A22.4	-1.11556	6.68e-05	ENSG00000280254
RP11-822E23.6	2.72143	0.000432927	ENSG00000266050
[truncated: 601 more rows]
