# Supplementary material for: Reversal of cancer gene expression identifies repurposed drugs for diffuse intrinsic pontine glioma
Source: Acta Neuropathol Commun. 2022 Oct 23;10:150. doi: 10.1186/s40478-022-01463-z (PMC9590174; doi:10.1186/s40478-022-01463-z)
Supplement: Supplementary file 7 — Additional file 7: Table S6. The list of differential expression genes upon drug treament in SF8628 cells. [file 40478_2022_1463_MOESM7_ESM.xlsx]

## Sheet: MMF_SIG
identifier	log2FoldChange	logCPM	LR	pvalue	padj	tax_id	GeneID	LocusTag	chromosome	map_location	description	type	Symbol_autho	name	status	other	Symbol	diffexpressed	delabel
ENSG00000000003	0.120399	4.43524	1.3827	0.239641	1	9606	7105	UNQ767/PRO1560	X	Xq22	tetraspanin 6	protein-coding	TSPAN6	tetraspanin 6	O	A15 homolog|putative NF-kappa-B-activati	TSPAN6	NO	#N/A
ENSG00000000419	0.153976	5.99642	3.27404	0.0703843	1	9606	8813	RP5-914P20.2	20	20q13.13	dolichyl-phosphate mannosyltransferase polypeptide 1, catalytic subunit	protein-coding	DPM1	dolichyl-phosphate mannosyltransferase polypeptide 1, catalytic subunit	O	DPM synthase complex, catalytic subunit|	DPM1	NO	#N/A
ENSG00000000457	0.0319189	3.87864	0.08069	0.776365	1	9606	57147	RP1-97P20.2	1	1q24.2	SCY1-like 3 (S. cerevisiae)	protein-coding	SCYL3	SCY1-like 3 (S. cerevisiae)	O	SCY1-like protein 3|ezrin-binding partne	SCYL3	NO	#N/A
ENSG00000000460	0.250989	5.77678	10.8971	0.000963138	1	9606	55732	NULL	1	1q24.2	chromosome 1 open reading frame 112	protein-coding	C1orf112	chromosome 1 open reading frame 112	O	uncharacterized protein C1orf112	C1orf112	NO	#N/A
ENSG00000000971	0.678928	6.30428	71.22	3.1954e-17	4.27544e-13	9606	3075	RP1-177P10.1	1	1q32	complement factor H	protein-coding	CFH	complement factor H	O	H factor 1 (complement)|H factor 2 (comp	CFH	NO	#N/A
ENSG00000001036	0.0564605	7.32225	0.767998	0.380837	1	9606	2519	RP1-20N2.5	6	6q24	fucosidase, alpha-L- 2, plasma	protein-coding	FUCA2	fucosidase, alpha-L- 2, plasma	O	alpha-L-fucosidase 2|alpha-L-fucoside fu	FUCA2	NO	#N/A
ENSG00000001084	-0.12795	5.52234	2.57933	0.108268	1	9606	2729	NULL	6	6p12	glutamate-cysteine ligase, catalytic subunit	protein-coding	GCLC	glutamate-cysteine ligase, catalytic subunit	O	GCS heavy chain|gamma-ECS|gamma-glutamyl	GCLC	NO	#N/A
ENSG00000001167	-0.220341	6.20184	7.19897	0.00729455	1	9606	4800	NULL	6	6p21.3	nuclear transcription factor Y, alpha	protein-coding	NFYA	nuclear transcription factor Y, alpha	O	CAAT box DNA-binding protein subunit A|C	NFYA	NO	#N/A
ENSG00000001460	0.414507	3.10838	8.05827	0.00452965	1	9606	90529	RP3-462O23.2	1	1p36.11	sperm-tail PG-rich repeat containing 1	protein-coding	STPG1	sperm-tail PG-rich repeat containing 1	O	O(6)-methylguanine-induced apoptosis 2|O	STPG1	NO	#N/A
ENSG00000001461	0.373874	5.89564	25.4546	4.52917e-07	0.00535529	9606	57185	RP3-462O23.3	1	1p36.12-p35.1	NIPA-like domain containing 3	protein-coding	NIPAL3	NIPA-like domain containing 3	O	NIPA-like protein 3	NIPAL3	NO	#N/A
ENSG00000001497	-0.292598	6.29545	10.1133	0.00147201	1	9606	81887	RP3-475B7.2	X	Xq12	LAS1-like (S. cerevisiae)	protein-coding	LAS1L	LAS1-like (S. cerevisiae)	O	protein LAS1 homolog|ribosomal biogenesi	LAS1L	NO	#N/A
ENSG00000001561	0.330858	4.43642	8.84843	0.00293341	1	9606	22875	NULL	6	6p21.1	ectonucleotide pyrophosphatase/phosphodiesterase 4 (putative)	protein-coding	ENPP4	ectonucleotide pyrophosphatase/phosphodiesterase 4 (putative)	O	E-NPP 4|NPP-4|ectonucleotide pyrophospha	ENPP4	NO	#N/A
ENSG00000001617	-0.2821	5.90129	7.69549	0.0055359	1	9606	6405	NULL	3	3p21.3	sema domain, immunoglobulin domain (Ig), short basic domain, secreted, (semaphorin) 3F	protein-coding	SEMA3F	sema domain, immunoglobulin domain (Ig), short basic domain, secreted, (semaphorin) 3F	O	sema III/F|sema IV|sema domain, immunogl	SEMA3F	NO	#N/A
ENSG00000001629	-0.14236	6.86219	2.045	0.152707	1	9606	54467	NULL	7	7q21.2	ankyrin repeat and IBR domain containing 1	protein-coding	ANKIB1	ankyrin repeat and IBR domain containing 1	O	ankyrin repeat and IBR domain-containing	ANKIB1	NO	#N/A
ENSG00000001630	0.0337647	6.74924	0.182038	0.669628	1	9606	1595	NULL	7	7q21.2	cytochrome P450, family 51, subfamily A, polypeptide 1	protein-coding	CYP51A1	cytochrome P450, family 51, subfamily A, polypeptide 1	O	CYPLI|cytochrome P450 51A1|cytochrome P4	CYP51A1	NO	#N/A
ENSG00000001631	0.109042	5.64285	1.35822	0.243847	1	9606	889	NULL	7	7q21.2	KRIT1, ankyrin repeat containing	protein-coding	KRIT1	KRIT1, ankyrin repeat containing	O	ankyrin repeat-containing protein Krit1|	KRIT1	NO	#N/A
ENSG00000002016	0.850245	3.59341	53.2785	2.89451e-13	3.78718e-09	9606	5893	NULL	12	12p13-p12.2	RAD52 homolog (S. cerevisiae)	protein-coding	RAD52	RAD52 homolog (S. cerevisiae)	O	DNA repair protein RAD52 homolog|recombi	RAD52	NO	#N/A
ENSG00000002330	-0.155745	5.04255	1.89788	0.168316	1	9606	572	NULL	11	11q13.1	BCL2-associated agonist of cell death	protein-coding	BAD	BCL2-associated agonist of cell death	O	BCL-X/BCL-2 binding protein|BCL2-antagon	BAD	NO	#N/A
ENSG00000002549	-0.00562583	6.79495	0.00578049	0.939396	1	9606	51056	NULL	4	4p15.32	leucine aminopeptidase 3	protein-coding	LAP3	leucine aminopeptidase 3	O	LAP-3|cytosol aminopeptidase|leucyl amin	LAP3	NO	#N/A
ENSG00000002586	-0.16894	7.02287	3.06793	0.0798513	1	9606	4267	NULL	X|Y	Xp22.32 and Yp11.3	CD99 molecule	protein-coding	CD99	CD99 molecule	O	CD99 antigen|E2 antigen|MIC2 (monoclonal	CD99	NO	#N/A
ENSG00000002746	-0.00144215	3.58303	0.000133883	0.990768	1	9606	23072	NULL	7	7p13	HECT, C2 and WW domain containing E3 ubiquitin protein ligase 1	protein-coding	HECW1	HECT, C2 and WW domain containing E3 ubiquitin protein ligase 1	O	E3 ubiquitin-protein ligase HECW1|HECT t	HECW1	NO	#N/A
ENSG00000002822	-1.15969	5.87267	171.603	3.30457e-39	4.56592e-35	9606	8379	NULL	7	7p22	MAD1 mitotic arrest deficient-like 1 (yeast)	protein-coding	MAD1L1	MAD1 mitotic arrest deficient-like 1 (yeast)	O	MAD1-like protein 1|mitotic arrest defic	MAD1L1	DOWN	MAD1L1
ENSG00000002834	-0.209843	8.97299	7.20729	0.00726078	1	9606	3927	NULL	17	17q11-q21.3	LIM and SH3 protein 1	protein-coding	LASP1	LIM and SH3 protein 1	O	LIM and SH3 domain protein 1|metastatic	LASP1	NO	#N/A
ENSG00000002919	-0.209334	5.25917	4.25931	0.0390357	1	9606	29916	NULL	17	17q21.32	sorting nexin 11	protein-coding	SNX11	sorting nexin 11	O	sorting nexin-11	SNX11	NO	#N/A
ENSG00000003056	-0.0536862	8.50741	0.753674	0.385316	1	9606	4074	NULL	12	12p13	mannose-6-phosphate receptor (cation dependent)	protein-coding	M6PR	mannose-6-phosphate receptor (cation dependent)	O	46-kDa mannose 6-phosphate receptor|CD M	M6PR	NO	#N/A
ENSG00000003096	-0.217416	3.70804	3.891	0.0485455	1	9606	90293	NULL	X	Xq23-q24	kelch-like family member 13	protein-coding	KLHL13	kelch-like family member 13	O	BTB and kelch domain containing 2|kelch-	KLHL13	NO	#N/A
ENSG00000003147	0.354173	2.89423	6.86726	0.00877891	1	9606	3382	NULL	7	7p22	islet cell autoantigen 1, 69kDa	protein-coding	ICA1	islet cell autoantigen 1, 69kDa	O	69 kDa islet cell autoantigen|diabetes m	ICA1	NO	#N/A
ENSG00000003249	-0.344884	1.71445	3.40218	0.0651105	1	9606	79007	NULL	16	16q24.3	dysbindin (dystrobrevin binding protein 1) domain containing 1	protein-coding	DBNDD1	dysbindin (dystrobrevin binding protein 1) domain containing 1	O	dysbindin domain-containing protein 1	DBNDD1	NO	#N/A
ENSG00000003393	0.122931	5.16829	2.24624	0.133939	1	9606	57679	NULL	2	2q33.1	amyotrophic lateral sclerosis 2 (juvenile)	protein-coding	ALS2	amyotrophic lateral sclerosis 2 (juvenile)	O	alsin|amyotrophic lateral sclerosis 2 ch	ALS2	NO	#N/A
ENSG00000003400	-0.237844	2.61137	2.67965	0.101638	1	9606	843	NULL	2	2q33-q34	caspase 10, apoptosis-related cysteine peptidase	protein-coding	CASP10	caspase 10, apoptosis-related cysteine peptidase	O	CASP-10|FADD-like ICE2|FAS-associated de	CASP10	NO	#N/A
ENSG00000003402	0.291197	5.48849	12.283	0.000457104	1	9606	8837	NULL	2	2q33-q34	CASP8 and FADD-like apoptosis regulator	protein-coding	CFLAR	CASP8 and FADD-like apoptosis regulator	O	FADD-like anti-apoptotic molecule|FADD-l	CFLAR	NO	#N/A
ENSG00000003436	-0.459732	4.76734	20.1892	7.01465e-06	0.0790551	9606	7035	NULL	2	2q32	tissue factor pathway inhibitor (lipoprotein-associated coagulation inhibitor)	protein-coding	TFPI	tissue factor pathway inhibitor (lipoprotein-associated coagulation inhibitor)	O	anti-convertin|extrinsic pathway inhibit	TFPI	NO	#N/A
ENSG00000003509	0.138173	4.05313	1.65932	0.197695	1	9606	55471	PRO1853	2	2p22.2	NADH dehydrogenase (ubiquinone) complex I, assembly factor 7	protein-coding	NDUFAF7	NADH dehydrogenase (ubiquinone) complex I, assembly factor 7	O	NADH dehydrogenase [ubiquinone] complex	NDUFAF7	NO	#N/A
ENSG00000003756	-0.116948	6.2286	2.27057	0.131851	1	9606	10181	H37	3	3p21.3	RNA binding motif protein 5	protein-coding	RBM5	RNA binding motif protein 5	O	RNA-binding protein 5|putative tumor sup	RBM5	NO	#N/A
ENSG00000003987	-0.849435	0.205926	8.06349	0.0045166	1	9606	9108	NULL	8	8p22	myotubularin related protein 7	protein-coding	MTMR7	myotubularin related protein 7	O	myotubularin-related protein 7	MTMR7	NO	#N/A
ENSG00000003989	-0.119301	6.19029	1.77946	0.182216	1	9606	6542	NULL	8	8p22	solute carrier family 7 (cationic amino acid transporter, y+ system), member 2	protein-coding	SLC7A2	solute carrier family 7 (cationic amino acid transporter, y+ system), member 2	O	low affinity cationic amino acid transpo	SLC7A2	NO	#N/A
ENSG00000004059	-0.0534807	6.03655	0.329133	0.56617	1	9606	381	NULL	7	7q31.3	ADP-ribosylation factor 5	protein-coding	ARF5	ADP-ribosylation factor 5	O	NULL	ARF5	NO	#N/A
ENSG00000004139	0.534769	4.15812	22.5581	2.03885e-06	0.0235569	9606	23098	NULL	17	17q11	sterile alpha and TIR motif containing 1	protein-coding	SARM1	sterile alpha and TIR motif containing 1	O	SAM domain-containing protein 2|sterile	SARM1	NO	#N/A
ENSG00000004142	-0.204001	6.56794	5.66945	0.0172629	1	9606	26073	HSPC017	17	17q11.2	polymerase (DNA-directed), delta interacting protein 2	protein-coding	POLDIP2	polymerase (DNA-directed), delta interacting protein 2	O	38 kDa DNA polymerase delta interaction	POLDIP2	NO	#N/A
ENSG00000004399	-0.322362	7.11964	12.5762	0.000390685	1	9606	23129	NULL	3	3q22.1	plexin D1	protein-coding	PLXND1	plexin D1	O	plexin-D1	PLXND1	NO	#N/A
ENSG00000004455	-0.289553	7.20526	14.5875	0.0001338	1	9606	204	NULL	1	1p34	adenylate kinase 2	protein-coding	AK2	adenylate kinase 2	O	ATP-AMP transphosphorylase 2|ATP:AMP pho	AK2	NO	#N/A
ENSG00000004478	-0.413418	8.11782	18.5438	1.66044e-05	0.183711	9606	2288	NULL	12	12p13.33	FK506 binding protein 4, 59kDa	protein-coding	FKBP4	FK506 binding protein 4, 59kDa	O	51 kDa FK506-binding protein|FK506-bindi	FKBP4	NO	#N/A
ENSG00000004487	-0.273302	7.40218	15.9909	6.36476e-05	0.67842	9606	23028	RP1-184J9.1	1	1p36.12	lysine (K)-specific demethylase 1A	protein-coding	KDM1A	lysine (K)-specific demethylase 1A	O	BRAF35-HDAC complex protein BHC110|FAD-b	KDM1A	NO	#N/A
ENSG00000004534	-0.386414	6.89916	23.679	1.13819e-06	0.0132781	9606	10180	NULL	3	3p21.3	RNA binding motif protein 6	protein-coding	RBM6	RNA binding motif protein 6	O	RNA-binding motif protein 6|RNA-binding	RBM6	NO	#N/A
ENSG00000004660	-0.557119	3.18774	14.9011	0.000113297	1	9606	84254	NULL	17	17p13.2	calcium/calmodulin-dependent protein kinase kinase 1, alpha	protein-coding	CAMKK1	calcium/calmodulin-dependent protein kinase kinase 1, alpha	O	CAMKK alpha protein|caM-KK 1|caM-KK alph	CAMKK1	NO	#N/A
ENSG00000004700	-0.0249165	7.19125	0.123385	0.725392	1	9606	5965	NULL	12	12p12	RecQ protein-like (DNA helicase Q1-like)	protein-coding	RECQL	RecQ protein-like (DNA helicase Q1-like)	O	ATP-dependent DNA helicase Q1|DNA helica	RECQL	NO	#N/A
ENSG00000004766	0.235698	5.03734	5.83868	0.0156775	1	9606	55610	NULL	7	7q21.3	coiled-coil domain containing 132	protein-coding	CCDC132	coiled-coil domain containing 132	O	coiled-coil domain-containing protein 13	CCDC132	NO	#N/A
ENSG00000004776	0.862107	1.69488	20.7662	5.18911e-06	0.0589171	9606	126393	NULL	19	19q13.12	heat shock protein, alpha-crystallin-related, B6	protein-coding	HSPB6	heat shock protein, alpha-crystallin-related, B6	O	heat shock 20 kDa-like protein p20|heat	HSPB6	NO	#N/A
ENSG00000004777	-0.303457	3.00959	4.76161	0.0291013	1	9606	115703	NULL	19	19q13.12	Rho GTPase activating protein 33	protein-coding	ARHGAP33	Rho GTPase activating protein 33	O	neurite outgrowth multiadaptor RhoGAP pr	ARHGAP33	NO	#N/A
ENSG00000004779	-0.0448573	6.84948	0.380308	0.537438	1	9606	4706	NULL	16	16p12.2	NADH dehydrogenase (ubiquinone) 1, alpha/beta subcomplex, 1, 8kDa	protein-coding	NDUFAB1	NADH dehydrogenase (ubiquinone) 1, alpha/beta subcomplex, 1, 8kDa	O	CI-SDAP|NADH-ubiquinone oxidoreductase 9	NDUFAB1	NO	#N/A
ENSG00000004799	0.332674	1.85178	3.59362	0.0580018	1	9606	5166	NULL	7	7q21.3	pyruvate dehydrogenase kinase, isozyme 4	protein-coding	PDK4	pyruvate dehydrogenase kinase, isozyme 4	O	[Pyruvate dehydrogenase [lipoamide]] kin	PDK4	NO	#N/A
ENSG00000004864	-0.0737604	6.01657	0.886956	0.346304	1	9606	10165	NULL	7	7q21.3	solute carrier family 25 (aspartate/glutamate carrier), member 13	protein-coding	SLC25A13	solute carrier family 25 (aspartate/glutamate carrier), member 13	O	calcium-binding mitochondrial carrier pr	SLC25A13	NO	#N/A
ENSG00000004866	0.256831	4.87338	7.72732	0.00543913	1	9606	7982	NULL	7	7q31.2	suppression of tumorigenicity 7	protein-coding	ST7	suppression of tumorigenicity 7	O	family with sequence similarity 4, subfa	ST7	NO	#N/A
ENSG00000004897	-0.214512	8.05849	6.0366	0.0140123	1	9606	996	NULL	17	17q21.32	cell division cycle 27	protein-coding	CDC27	cell division cycle 27	O	CDC27 homolog|H-NUC|anaphase promoting c	CDC27	NO	#N/A
ENSG00000004961	-0.0307866	5.36696	0.1043	0.746729	1	9606	3052	NULL	X	Xp22.3	holocytochrome c synthase	protein-coding	HCCS	holocytochrome c synthase	O	cytochrome c heme-lyase|cytochrome c-typ	HCCS	NO	#N/A
ENSG00000004975	-0.0740623	5.16004	0.484226	0.486514	1	9606	1856	NULL	17	17p13.1	dishevelled, dsh homolog 2 (Drosophila)	protein-coding	DVL2	dishevelled, dsh homolog 2 (Drosophila)	O	dishevelled 2 (homologous to Drosophila	DVL2	NO	#N/A
ENSG00000005007	-0.21154	7.45947	9.21692	0.00239789	1	9606	5976	NULL	19	19p13.2-p13.11	UPF1 regulator of nonsense transcripts homolog (yeast)	protein-coding	UPF1	UPF1 regulator of nonsense transcripts homolog (yeast)	O	ATP-dependent helicase RENT1|UP Frameshi	UPF1	NO	#N/A
ENSG00000005020	-0.421611	0.645287	2.79346	0.0946499	1	9606	8935	NULL	7	7p15.2	src kinase associated phosphoprotein 2	protein-coding	SKAP2	src kinase associated phosphoprotein 2	O	Fyn-associated phosphoprotein SKAP55 hom	SKAP2	NO	#N/A
ENSG00000005022	0.142311	8.84022	4.73233	0.0296007	1	9606	292	NULL	X	Xq24	solute carrier family 25 (mitochondrial carrier; adenine nucleotide translocator), member 5	protein-coding	SLC25A5	solute carrier family 25 (mitochondrial carrier; adenine nucleotide translocator), member 5	O	ADP,ATP carrier protein 2|ADP,ATP carrie	SLC25A5	NO	#N/A
ENSG00000005059	0.198053	4.89628	4.16189	0.0413432	1	9606	55013	NULL	4	4q25	coiled-coil domain containing 109B	protein-coding	CCDC109B	coiled-coil domain containing 109B	O	coiled-coil domain-containing protein 10	CCDC109B	NO	#N/A
ENSG00000005075	-0.247449	5.72573	5.58942	0.0180693	1	9606	5439	NULL	7	7q22.1	polymerase (RNA) II (DNA directed) polypeptide J, 13.3kDa	protein-coding	POLR2J	polymerase (RNA) II (DNA directed) polypeptide J, 13.3kDa	O	DNA-directed RNA polymerase II subunit J	POLR2J	NO	#N/A
ENSG00000005100	-0.200888	5.65728	4.9362	0.0262997	1	9606	56919	NULL	17	17p13.2	DEAH (Asp-Glu-Ala-His) box polypeptide 33	protein-coding	DHX33	DEAH (Asp-Glu-Ala-His) box polypeptide 33	O	DEAD/H (Asp-Glu-Ala-Asp/His) box polypep	DHX33	NO	#N/A
ENSG00000005108	-1.23747	1.70848	40.8537	1.64064e-10	2.08706e-06	9606	221981	NULL	7	7p21.3	thrombospondin, type I, domain containing 7A	protein-coding	THSD7A	thrombospondin, type I, domain containing 7A	O	thrombospondin type-1 domain-containing	THSD7A	DOWN	THSD7A
ENSG00000005156	-0.629999	4.89803	48.8753	2.72761e-12	3.54207e-08	9606	3980	NULL	17	17q11.2-q12	ligase III, DNA, ATP-dependent	protein-coding	LIG3	ligase III, DNA, ATP-dependent	O	DNA ligase 3|ligase II, DNA, ATP-depende	LIG3	NO	#N/A
ENSG00000005175	0.213403	6.18269	6.03238	0.0140458	1	9606	79657	NULL	12	12q13.11	RNA polymerase II associated protein 3	protein-coding	RPAP3	RNA polymerase II associated protein 3	O	RNA polymerase II-associated protein 3	RPAP3	NO	#N/A
ENSG00000005187	-0.0180404	3.31058	0.0220741	0.88189	1	9606	6296	NULL	16	16p13.11	acyl-CoA synthetase medium-chain family member 3	protein-coding	ACSM3	acyl-CoA synthetase medium-chain family member 3	O	SA (rat hypertension-associated) homolog	ACSM3	NO	#N/A
ENSG00000005189	0.478553	4.30048	24.3545	8.01405e-07	0.00940288	#N/A	#N/A	#N/A	#N/A	#N/A	#N/A	#N/A	#N/A	#N/A	#N/A	#N/A	AC004381.6	NO	#N/A
ENSG00000005194	-0.00661033	5.46178	0.00654676	0.935512	1	9606	57019	CUA001	16	16q21	cytokine induced apoptosis inhibitor 1	protein-coding	CIAPIN1	cytokine induced apoptosis inhibitor 1	O	anamorsin|cytokine-induced apoptosis inh	CIAPIN1	NO	#N/A
ENSG00000005206	-0.285167	4.87434	6.51265	0.010711	1	9606	56928	NULL	19	19p13.3	signal peptide peptidase like 2B	protein-coding	SPPL2B	signal peptide peptidase like 2B	O	SPP-like 2B|intramembrane protease 4|pre	SPPL2B	NO	#N/A
ENSG00000005238	-0.103221	3.30032	0.710388	0.399315	1	9606	80256	NULL	9	9p13.3	family with sequence similarity 214, member B	protein-coding	FAM214B	family with sequence similarity 214, member B	O	protein FAM214B	FAM214B	NO	#N/A
ENSG00000005243	0.460022	4.40506	18.4871	1.71058e-05	0.189036	9606	51226	NULL	17	17q21.32	coatomer protein complex, subunit zeta 2	protein-coding	COPZ2	coatomer protein complex, subunit zeta 2	O	coatomer subunit zeta-2|nonclathrin coat	COPZ2	NO	#N/A
ENSG00000005249	0.149905	4.74265	1.99126	0.158209	1	9606	5577	NULL	7	7q22	protein kinase, cAMP-dependent, regulatory, type II, beta	protein-coding	PRKAR2B	protein kinase, cAMP-dependent, regulatory, type II, beta	O	H_RG363E19.2|WUGSC:H_RG363E19.2|cAMP-dep	PRKAR2B	NO	#N/A
ENSG00000005302	0.227133	5.20669	6.15078	0.0131354	1	9606	10943	NULL	X	Xp22.3	male-specific lethal 3 homolog (Drosophila)	protein-coding	MSL3	male-specific lethal 3 homolog (Drosophila)	O	MSL3-like 1|male-specific lethal 3 homol	MSL3	NO	#N/A
ENSG00000005339	-0.102971	7.00665	0.828785	0.362624	1	9606	1387	NULL	16	16p13.3	CREB binding protein	protein-coding	CREBBP	CREB binding protein	O	CREB-binding protein	CREBBP	NO	#N/A
ENSG00000005379	-0.231346	4.01761	4.22184	0.0399069	1	9606	9256	NULL	17	17q22-q23	benzodiazapine receptor (peripheral) associated protein 1	protein-coding	BZRAP1	benzodiazapine receptor (peripheral) associated protein 1	O	RIMS-binding protein 1|peripheral benzod	BZRAP1	NO	#N/A
ENSG00000005436	0.231143	4.79695	6.32522	0.0119033	1	9606	6936	NULL	2	2p12	GC-rich sequence DNA-binding factor 2	protein-coding	GCFC2	GC-rich sequence DNA-binding factor 2	O	GC binding factor|GC bindng factor|TCF-9	GCFC2	NO	#N/A
ENSG00000005448	-0.0910314	3.42434	0.568056	0.451033	1	9606	84058	NULL	2	2p13.1	WD repeat domain 54	protein-coding	WDR54	WD repeat domain 54	O	WD repeat-containing protein 54	WDR54	NO	#N/A
ENSG00000005469	-0.367355	3.42161	9.04442	0.00263498	1	9606	54677	NULL	7	7q21.1	carnitine O-octanoyltransferase	protein-coding	CROT	carnitine O-octanoyltransferase	O	peroxisomal carnitine O-octanoyltransfer	CROT	NO	#N/A
ENSG00000005471	1.78799	1.61258	78.2631	9.01921e-19	1.21381e-14	9606	5244	NULL	7	7q21.1	ATP-binding cassette, sub-family B (MDR/TAP), member 4	protein-coding	ABCB4	ATP-binding cassette, sub-family B (MDR/TAP), member 4	O	ATP-binding cassette sub-family B member	ABCB4	UP	ABCB4
ENSG00000005483	-0.352055	5.99606	10.1481	0.0014445	1	9606	55904	NULL	7	7q22.1	lysine (K)-specific methyltransferase 2E	protein-coding	KMT2E	lysine (K)-specific methyltransferase 2E	O	histone-lysine N-methyltransferase MLL5|	KMT2E	NO	#N/A
ENSG00000005486	-0.193406	5.50454	3.9281	0.0474855	1	9606	57414	NULL	7	7q11.23	rhomboid domain containing 2	protein-coding	RHBDD2	rhomboid domain containing 2	O	H_RG122E10.2a|H_RG122E10.2b|WUGSC:H_RG12	RHBDD2	NO	#N/A
ENSG00000005700	-0.195909	6.17904	4.7421	0.0294331	1	9606	25998	NULL	6	6q14.1	inhibitor of Bruton agammaglobulinemia tyrosine kinase	protein-coding	IBTK	inhibitor of Bruton agammaglobulinemia tyrosine kinase	O	BTK-binding protein|Bruton agammaglobuli	IBTK	NO	#N/A
ENSG00000005801	-0.157654	4.64955	2.95823	0.0854416	1	9606	7748	NULL	11	11p15.5	zinc finger protein 195	protein-coding	ZNF195	zinc finger protein 195	O	hypoxia-regulated factor-1|krueppel fami	ZNF195	NO	#N/A
ENSG00000005810	-0.102178	5.79425	1.31711	0.251111	1	9606	23077	AC001226.5	13	13q22	MYC binding protein 2, E3 ubiquitin protein ligase	protein-coding	MYCBP2	MYC binding protein 2, E3 ubiquitin protein ligase	O	myc-binding protein 2|pam/highwire/rpm-1	MYCBP2	NO	#N/A
ENSG00000005812	0.324549	4.85251	12.3052	0.000451707	1	9606	26224	NULL	13	13q22	F-box and leucine-rich repeat protein 3	protein-coding	FBXL3	F-box and leucine-rich repeat protein 3	O	F-box and leucine-rich repeat protein 3A	FBXL3	NO	#N/A
ENSG00000005882	0.163784	5.48597	3.61647	0.05721	1	9606	5164	NULL	17	17q21.33	pyruvate dehydrogenase kinase, isozyme 2	protein-coding	PDK2	pyruvate dehydrogenase kinase, isozyme 2	O	PDH kinase 2|pyruvate dehydrogenase kina	PDK2	NO	#N/A
ENSG00000005884	-0.142298	11.7088	5.714	0.0168301	1	9606	3675	NULL	17	17q21.33	integrin, alpha 3 (antigen CD49C, alpha 3 subunit of VLA-3 receptor)	protein-coding	ITGA3	integrin, alpha 3 (antigen CD49C, alpha 3 subunit of VLA-3 receptor)	O	CD49 antigen-like family member C|FRP-2|	ITGA3	NO	#N/A
ENSG00000005889	0.0908429	5.72933	0.858531	0.35415	1	9606	7543	NULL	X	Xp21.3	zinc finger protein, X-linked	protein-coding	ZFX	zinc finger protein, X-linked	O	X-linked zinc finger protein|zinc finger	ZFX	NO	#N/A
ENSG00000005893	0.177265	7.63492	4.26881	0.0388181	1	9606	3920	NULL	X	Xq24	lysosomal-associated membrane protein 2	protein-coding	LAMP2	lysosomal-associated membrane protein 2	O	CD107 antigen-like family member B|lysos	LAMP2	NO	#N/A
ENSG00000006007	-0.0728688	6.54344	0.926265	0.335835	1	9606	51573	NULL	16	16p12-p11.2	glycerophosphodiester phosphodiesterase 1	protein-coding	GDE1	glycerophosphodiester phosphodiesterase 1	O	RGS16-interacting membrane protein|membr	GDE1	NO	#N/A
ENSG00000006015	-0.155729	4.91437	1.23606	0.266232	1	9606	55049	NULL	19	19p13.11	chromosome 19 open reading frame 60	protein-coding	C19orf60	chromosome 19 open reading frame 60	O	uncharacterized protein C19orf60	C19orf60	NO	#N/A
ENSG00000006016	0.0788151	5.36489	0.587689	0.443314	1	9606	9244	UNQ288/PRO327	19	19p12	cytokine receptor-like factor 1	protein-coding	CRLF1	cytokine receptor-like factor 1	O	class I cytokine receptor|cytokine type	CRLF1	NO	#N/A
ENSG00000006025	0.308397	5.60288	7.79461	0.00524024	1	9606	114881	NULL	17	17q21	oxysterol binding protein-like 7	protein-coding	OSBPL7	oxysterol binding protein-like 7	O	ORP-7|OSBP-related protein 7|oxysterol-b	OSBPL7	NO	#N/A
ENSG00000006042	0.0577253	4.82003	0.403101	0.525492	1	9606	26022	UNQ536/PRO1079	17	17q11.2	transmembrane protein 98	protein-coding	TMEM98	transmembrane protein 98	O	NULL	TMEM98	NO	#N/A
ENSG00000006062	0.049108	5.20145	0.343923	0.557573	1	9606	9020	NULL	17	17q21	mitogen-activated protein kinase kinase kinase 14	protein-coding	MAP3K14	mitogen-activated protein kinase kinase kinase 14	O	NF-kappa-beta-inducing kinase|serine/thr	MAP3K14	NO	#N/A
ENSG00000006118	0.292907	5.27846	7.90908	0.00491873	1	9606	54972	NULL	11	11q12.2	transmembrane protein 132A	protein-coding	TMEM132A	transmembrane protein 132A	O	GRP78-binding protein|HSPA5-binding prot	TMEM132A	NO	#N/A
ENSG00000006125	-0.125679	7.98798	2.6487	0.103635	1	9606	163	NULL	17	17q11.2-q12	adaptor-related protein complex 2, beta 1 subunit	protein-coding	AP2B1	adaptor-related protein complex 2, beta 1 subunit	O	AP-2 complex subunit beta|adapter-relate	AP2B1	NO	#N/A
ENSG00000006194	-0.387736	5.35732	12.5983	0.000386091	1	9606	10127	NULL	16	16p13.3	zinc finger protein 263	protein-coding	ZNF263	zinc finger protein 263	O	zinc finger protein FPM315|zinc finger p	ZNF263	NO	#N/A
ENSG00000006210	0.551357	0.216461	3.52198	0.0605601	1	9606	6376	A-152E5.2	16	16q13	chemokine (C-X3-C motif) ligand 1	protein-coding	CX3CL1	chemokine (C-X3-C motif) ligand 1	O	C-X3-C motif chemokine 1|CX3C membrane-a	CX3CL1	NO	#N/A
ENSG00000006282	0.0595872	6.71695	0.440822	0.506726	1	9606	64847	NULL	17	17q21.33	spermatogenesis associated 20	protein-coding	SPATA20	spermatogenesis associated 20	O	sperm protein SSP411|sperm-specific prot	SPATA20	NO	#N/A
ENSG00000006327	-0.355302	7.35622	8.1827	0.00422918	1	9606	51330	NULL	16	16p13.3	tumor necrosis factor receptor superfamily, member 12A	protein-coding	TNFRSF12A	tumor necrosis factor receptor superfamily, member 12A	O	FGF-inducible 14|fibroblast growth facto	TNFRSF12A	NO	#N/A
ENSG00000006432	-0.420639	2.92352	9.79358	0.00175122	1	9606	4293	NULL	14	14q24.2	mitogen-activated protein kinase kinase kinase 9	protein-coding	MAP3K9	mitogen-activated protein kinase kinase kinase 9	O	mixed lineage kinase 1 (tyr and ser/thr	MAP3K9	NO	#N/A
ENSG00000006451	0.0244507	6.836	0.100145	0.751655	1	9606	5898	NULL	7	7p15-p13	v-ral simian leukemia viral oncogene homolog A (ras related)	protein-coding	RALA	v-ral simian leukemia viral oncogene homolog A (ras related)	O	RAS-like protein A|Ras family small GTP	RALA	NO	#N/A
ENSG00000006453	-0.378504	4.38295	12.5702	0.000391956	1	9606	55971	NULL	7	7q22.1	BAI1-associated protein 2-like 1	protein-coding	BAIAP2L1	BAI1-associated protein 2-like 1	O	BAI1-associated protein 2-like protein 1	BAIAP2L1	NO	#N/A
ENSG00000006459	0.541504	2.38521	11.5605	0.000673694	1	#N/A	#N/A	#N/A	#N/A	#N/A	#N/A	#N/A	#N/A	#N/A	#N/A	#N/A	KDM7A	NO	#N/A
ENSG00000006468	-0.133677	6.77474	1.9191	0.165956	1	9606	2115	NULL	7	7p21.3	ets variant 1	protein-coding	ETV1	ets variant 1	O	ETS translocation variant 1|ets variant	ETV1	NO	#N/A
ENSG00000006530	0.117664	5.59053	2.38405	0.122579	1	9606	55750	NULL	7	7q34	acylglycerol kinase	protein-coding	AGK	acylglycerol kinase	O	acylglycerol kinase, mitochondrial|hAGK|	AGK	NO	#N/A
ENSG00000006534	0.984228	5.87494	139.326	3.73685e-32	5.14339e-28	9606	221	NULL	11	11q13	aldehyde dehydrogenase 3 family, member B1	protein-coding	ALDH3B1	aldehyde dehydrogenase 3 family, member B1	O	aldehyde dehydrogenase 3B1|aldehyde dehy	ALDH3B1	NO	#N/A
ENSG00000006576	0.0676813	6.15545	0.626244	0.428736	1	9606	57157	NULL	7	7q11.23-q21	putative homeodomain transcription factor 2	protein-coding	PHTF2	putative homeodomain transcription factor 2	O	NULL	PHTF2	NO	#N/A
ENSG00000006607	-0.0222086	5.84861	0.054872	0.814793	1	9606	9855	NULL	2	2q37.3	FERM, RhoGEF and pleckstrin domain protein 2	protein-coding	FARP2	FERM, RhoGEF and pleckstrin domain protein 2	O	FERM domain including RhoGEF|FERM, RhoGE	FARP2	NO	#N/A
ENSG00000006625	-0.0794717	6.1605	0.90289	0.342008	1	9606	79017	NULL	7	7p15-p14	gamma-glutamylcyclotransferase	protein-coding	GGCT	gamma-glutamylcyclotransferase	O	cytochrome c-releasing factor 21|gamma -	GGCT	NO	#N/A
ENSG00000006634	-0.197828	5.91803	5.59972	0.0179633	1	9606	10926	NULL	7	7q21.3	DBF4 homolog (S. cerevisiae)	protein-coding	DBF4	DBF4 homolog (S. cerevisiae)	O	DBF4-type zinc finger-containing protein	DBF4	NO	#N/A
ENSG00000006638	-0.214005	1.00663	0.617838	0.431852	1	9606	6915	NULL	19	19p13.3	thromboxane A2 receptor	protein-coding	TBXA2R	thromboxane A2 receptor	O	prostanoid TP receptor	TBXA2R	NO	#N/A
ENSG00000006652	0.503146	7.18399	41.2793	1.31957e-10	1.68166e-06	9606	3475	NULL	7	7q31.1	interferon-related developmental regulator 1	protein-coding	IFRD1	interferon-related developmental regulator 1	O	12-O-tetradecanoylphorbol-13-acetate-ind	IFRD1	NO	#N/A
ENSG00000006695	-0.103156	4.21438	0.980179	0.322155	1	9606	1352	NULL	17	17p12	cytochrome c oxidase assembly homolog 10 (yeast)	protein-coding	COX10	cytochrome c oxidase assembly homolog 10 (yeast)	O	COX10 homolog, cytochrome c oxidase asse	COX10	NO	#N/A
ENSG00000006704	-0.0480942	5.29413	0.364996	0.545745	1	9606	9569	NULL	7	7q11.23	GTF2I repeat domain containing 1	protein-coding	GTF2IRD1	GTF2I repeat domain containing 1	O	USE B1-binding protein|Williams-Beuren s	GTF2IRD1	NO	#N/A
ENSG00000006712	-0.197497	5.81225	4.8043	0.0283887	1	9606	54623	NULL	19	19q13.1	Paf1, RNA polymerase II associated factor, homolog (S. cerevisiae)	protein-coding	PAF1	Paf1, RNA polymerase II associated factor, homolog (S. cerevisiae)	O	RNA polymerase II-associated factor 1 ho	PAF1	NO	#N/A
ENSG00000006715	0.191737	7.34029	5.17414	0.0229255	1	9606	27072	NULL	7	7p14-p13	vacuolar protein sorting 41 homolog (S. cerevisiae)	protein-coding	VPS41	vacuolar protein sorting 41 homolog (S. cerevisiae)	O	S53|vacuolar assembly protein 41|vacuola	VPS41	NO	#N/A
ENSG00000006740	0.369074	1.72884	4.05681	0.0439935	1	9606	9912	NULL	17	17p12	Rho GTPase activating protein 44	protein-coding	ARHGAP44	Rho GTPase activating protein 44	O	RICH-2|Rho-type GTPase-activating protei	ARHGAP44	NO	#N/A
ENSG00000006744	-0.389369	6.62741	27.1529	1.87982e-07	0.00224864	9606	60528	NULL	17	17p11.2	elaC homolog 2 (E. coli)	protein-coding	ELAC2	elaC homolog 2 (E. coli)	O	RNase Z 2|elaC homolog protein 2|heredit	ELAC2	NO	#N/A
ENSG00000006747	-0.0104326	1.54039	0.00283487	0.957538	1	9606	85477	NULL	7	7p21.3	scinderin	protein-coding	SCIN	scinderin	O	adseverin	SCIN	NO	#N/A
ENSG00000006756	0.722346	5.18455	56.7586	4.92737e-14	6.48245e-10	9606	414	NULL	X	Xp22.3	arylsulfatase D	protein-coding	ARSD	arylsulfatase D	O	NULL	ARSD	NO	#N/A
ENSG00000006757	0.361411	3.46472	9.63867	0.00190523	1	9606	8228	NULL	X	Xp22.3	patatin-like phospholipase domain containing 4	protein-coding	PNPLA4	patatin-like phospholipase domain containing 4	O	IPLA2 eta|calcium independent phospholip	PNPLA4	NO	#N/A
ENSG00000006831	-0.288631	7.33617	17.4962	2.8788e-05	0.313559	9606	79602	NULL	12	12p13.31	adiponectin receptor 2	protein-coding	ADIPOR2	adiponectin receptor 2	O	adiponectin receptor protein 2|progestin	ADIPOR2	NO	#N/A
ENSG00000006837	-0.00686376	0.892687	0.000876166	0.976386	1	9606	51265	NULL	5	5q31	cyclin-dependent kinase-like 3	protein-coding	CDKL3	cyclin-dependent kinase-like 3	O	serine-threonine protein kinase NKIAMRE|	CDKL3	NO	#N/A
ENSG00000007047	-0.243396	5.03639	6.23162	0.0125489	1	9606	57787	NULL	19	19q13.3	MAP/microtubule affinity-regulating kinase 4	protein-coding	MARK4	MAP/microtubule affinity-regulating kinase 4	O	MAP/microtubule affinity-regulating kina	MARK4	NO	#N/A
ENSG00000007080	-0.338238	5.63246	8.6677	0.003239	1	9606	115098	NULL	19	19p13.11	coiled-coil domain containing 124	protein-coding	CCDC124	coiled-coil domain containing 124	O	coiled-coil domain-containing protein 12	CCDC124	NO	#N/A
ENSG00000007168	-0.177088	6.65761	4.6034	0.0319087	1	9606	5048	NULL	17	17p13.3	platelet-activating factor acetylhydrolase 1b, regulatory subunit 1 (45kDa)	protein-coding	PAFAH1B1	platelet-activating factor acetylhydrolase 1b, regulatory subunit 1 (45kDa)	O	LIS-1|PAF acetylhydrolase 45 kDa subunit	PAFAH1B1	NO	#N/A
ENSG00000007202	0.201232	7.69347	5.59969	0.0179636	1	9606	9703	NULL	17	17q11.2	KIAA0100	protein-coding	KIAA0100	KIAA0100	O	U937-associated antigen|UPF0378 protein	KIAA0100	NO	#N/A
ENSG00000007255	-0.28523	2.23164	2.51811	0.112545	1	9606	79090	NULL	19	19q13.32	trafficking protein particle complex 6A	protein-coding	TRAPPC6A	trafficking protein particle complex 6A	O	TRAPP complex subunit 6A|trafficking pro	TRAPPC6A	NO	#N/A
ENSG00000007341	0.399206	3.32196	10.5793	0.00114361	1	9606	54879	RP4-770C6.2	1	1p13.2	suppression of tumorigenicity 7 like	protein-coding	ST7L	suppression of tumorigenicity 7 like	O	ST7-related protein|suppressor of tumori	ST7L	NO	#N/A
ENSG00000007372	-0.0600188	4.71936	0.440376	0.506941	1	9606	5080	NULL	11	11p13	paired box 6	protein-coding	PAX6	paired box 6	O	aniridia type II protein|oculorhombin|pa	PAX6	NO	#N/A
ENSG00000007376	-1.53469	5.82165	151.536	8.00216e-35	1.10358e-30	9606	113000	NULL	16	16p13.3	RNA pseudouridylate synthase domain containing 1	protein-coding	RPUSD1	RNA pseudouridylate synthase domain containing 1	O	RNA pseudouridylate synthase domain-cont	RPUSD1	DOWN	RPUSD1
ENSG00000007384	0.117148	5.91659	1.26527	0.260656	1	9606	64285	NULL	16	16p13.3	rhomboid 5 homolog 1 (Drosophila)	protein-coding	RHBDF1	rhomboid 5 homolog 1 (Drosophila)	O	epidermal growth factor receptor, relate	RHBDF1	NO	#N/A
ENSG00000007392	-0.0476146	6.46803	0.313299	0.575663	1	9606	55692	LA16c-OS12.1	16	16p13.3	LUC7-like (S. cerevisiae)	protein-coding	LUC7L	LUC7-like (S. cerevisiae)	O	putative RNA-binding protein Luc7-like 1	LUC7L	NO	#N/A
ENSG00000007516	6.01143	2.8105	617.577	2.51654e-136	3.50303e-132	9606	8938	AL031709.1	16	16p13.3	BAI1-associated protein 3	protein-coding	BAIAP3	BAI1-associated protein 3	O	BAI-associated protein 3	BAIAP3	UP	BAIAP3
ENSG00000007520	-0.856444	6.18041	46.0826	1.13369e-11	1.46303e-07	9606	115939	NULL	16	16p13.3	TSR3, 20S rRNA accumulation, homolog (S. cerevisiae)	protein-coding	TSR3	TSR3, 20S rRNA accumulation, homolog (S. cerevisiae)	O	probable ribosome biogenesis protein C16	TSR3	NO	#N/A
ENSG00000007541	-2.48654	5.2106	490.731	9.879e-109	1.37447e-104	9606	9091	NULL	16	16p13.3	phosphatidylinositol glycan anchor biosynthesis, class Q	protein-coding	PIGQ	phosphatidylinositol glycan anchor biosynthesis, class Q	O	N-acetylglucosaminyl transferase compone	PIGQ	DOWN	PIGQ
ENSG00000007545	-0.0320627	5.60291	0.0963332	0.756275	1	9606	57585	LA16c-431H6.2	16	16p13.3	Crm, cramped-like (Drosophila)	protein-coding	CRAMP1L	Crm, cramped-like (Drosophila)	O	T-complex expressed gene 4|hematological	CRAMP1L	NO	#N/A
ENSG00000007866	0.307293	4.09056	6.77121	0.009264	1	9606	7005	RP1-109F14.4	6	6p21.2	TEA domain family member 3	protein-coding	TEAD3	TEA domain family member 3	O	TEA domain family member 5|transcription	TEAD3	NO	#N/A
ENSG00000007923	-0.475039	6.48072	29.8193	4.74244e-08	0.000577297	9606	55735	RP1-126A5.3	1	1p36.31	DnaJ (Hsp40) homolog, subfamily C, member 11	protein-coding	DNAJC11	DnaJ (Hsp40) homolog, subfamily C, member 11	O	dnaJ homolog subfamily C member 11|novel	DNAJC11	NO	#N/A
ENSG00000007944	0.230605	2.54249	2.56153	0.109492	1	9606	29116	RP1-13D10.1	6	6p23-p22.3	myosin regulatory light chain interacting protein	protein-coding	MYLIP	myosin regulatory light chain interacting protein	O	E3 ubiquitin ligase-inducible degrader o	MYLIP	NO	#N/A
ENSG00000007968	-0.444818	4.31536	15.1203	0.000100871	1	9606	1870	NULL	1	1p36	E2F transcription factor 2	protein-coding	E2F2	E2F transcription factor 2	O	transcription factor E2F2	E2F2	NO	#N/A
ENSG00000008018	-0.226294	7.56853	5.64933	0.017462	1	9606	5689	NULL	6	6q27	proteasome (prosome, macropain) subunit, beta type, 1	protein-coding	PSMB1	proteasome (prosome, macropain) subunit, beta type, 1	O	macropain subunit C5|multicatalytic endo	PSMB1	NO	#N/A
ENSG00000008083	-0.399055	4.2519	15.5593	7.99556e-05	0.84625	9606	3720	NULL	6	6p24-p23	jumonji, AT rich interactive domain 2	protein-coding	JARID2	jumonji, AT rich interactive domain 2	O	jumonji homolog|jumonji-like protein|jum	JARID2	NO	#N/A
ENSG00000008086	0.731557	3.39584	29.9499	4.43349e-08	0.000539955	9606	6792	RP1-245G19.3	X	Xp22	cyclin-dependent kinase-like 5	protein-coding	CDKL5	cyclin-dependent kinase-like 5	O	cyclin dependent kinase 5 transcript|ser	CDKL5	NO	#N/A
ENSG00000008128	-0.176232	5.19707	3.72914	0.053471	1	9606	728642	RP1-283E3.2	1	1p36.33	cyclin-dependent kinase 11A	protein-coding	CDK11A	cyclin-dependent kinase 11A	O	PITSLRE B|PITSLRE protein kinase beta|PI	CDK11A	NO	#N/A
ENSG00000008130	-0.335094	5.74203	19.3854	1.0682e-05	0.119329	9606	65220	RP1-283E3.6	1	1p36.33	NAD kinase	protein-coding	NADK	NAD kinase	O	poly(P)/ATP NAD kinase	NADK	NO	#N/A
ENSG00000008256	0.142614	6.83457	3.64645	0.0561888	1	9606	9265	tcag7.847	7	7p22.1	cytohesin 3	protein-coding	CYTH3	cytohesin 3	O	ARF nucleotide-binding site opener 3|PH,	CYTH3	NO	#N/A
ENSG00000008277	0.725892	4.20369	51.238	8.1818e-13	1.06707e-08	9606	53616	NULL	7	7q21	ADAM metallopeptidase domain 22	protein-coding	ADAM22	ADAM metallopeptidase domain 22	O	a disintegrin and metalloproteinase doma	ADAM22	NO	#N/A
ENSG00000008282	0.0356851	6.91498	0.167796	0.682078	1	9606	6856	NULL	7	7q22.3	synaptophysin-like 1	protein-coding	SYPL1	synaptophysin-like 1	O	pantophysin|synaptophysin-like protein 1	SYPL1	NO	#N/A
ENSG00000008283	-0.0732701	5.02377	0.342406	0.558444	1	9606	1534	NULL	17	17q23.3	cytochrome b561	protein-coding	CYB561	cytochrome b561	O	cytochrome b-561|cytochrome b561 family,	CYB561	NO	#N/A
ENSG00000008294	-0.305166	8.60668	12.912	0.000326478	1	9606	9043	HLC6	17	17q21.33	sperm associated antigen 9	protein-coding	SPAG9	sperm associated antigen 9	O	C-Jun-amino-terminal kinase-interacting	SPAG9	NO	#N/A
ENSG00000008300	-0.271279	2.30845	1.50489	0.21992	1	9606	1951	NULL	3	3p21.31	cadherin, EGF LAG seven-pass G-type receptor 3	protein-coding	CELSR3	cadherin, EGF LAG seven-pass G-type receptor 3	O	EGF-like protein 1|EGF-like-domain, mult	CELSR3	NO	#N/A
ENSG00000008311	0.213855	5.07561	4.97159	0.025767	1	9606	10157	NULL	7	7q31.3	aminoadipate-semialdehyde synthase	protein-coding	AASS	aminoadipate-semialdehyde synthase	O	alpha-aminoadipate semialdehyde synthase	AASS	NO	#N/A
ENSG00000008324	0.172039	4.62541	3.41629	0.064556	1	9606	51188	NULL	3	3p21	synovial sarcoma translocation gene on chromosome 18-like 2	protein-coding	SS18L2	synovial sarcoma translocation gene on chromosome 18-like 2	O	SS18-like protein 2|SYT homolog 2	SS18L2	NO	#N/A
ENSG00000008382	-0.311439	1.24633	2.24134	0.134365	1	9606	84954	NULL	19	19p13.3	MPN domain containing	protein-coding	MPND	MPN domain containing	O	MPN domain-containing protein	MPND	NO	#N/A
ENSG00000008394	-0.0803459	7.9678	1.63266	0.201336	1	9606	4257	NULL	12	12p12.3-p12.1	microsomal glutathione S-transferase 1	protein-coding	MGST1	microsomal glutathione S-transferase 1	O	glutathione S-transferase 12|microsomal	MGST1	NO	#N/A
ENSG00000008405	0.695872	5.36613	67.0405	2.65991e-16	3.54486e-12	9606	1407	NULL	12	12q23-q24.1	cryptochrome 1 (photolyase-like)	protein-coding	CRY1	cryptochrome 1 (photolyase-like)	O	cryptochrome-1	CRY1	NO	#N/A
ENSG00000008441	-0.0484764	7.13664	0.411236	0.521343	1	9606	4784	NULL	19	19p13.3	nuclear factor I/X (CCAAT-binding transcription factor)	protein-coding	NFIX	nuclear factor I/X (CCAAT-binding transcription factor)	O	CCAAT-box-binding transcription factor|C	NFIX	NO	#N/A
ENSG00000008513	-0.176311	4.55592	2.87298	0.0900781	1	9606	6482	NULL	8	8q24.22	ST3 beta-galactoside alpha-2,3-sialyltransferase 1	protein-coding	ST3GAL1	ST3 beta-galactoside alpha-2,3-sialyltransferase 1	O	CMP-N-acetylneuraminate-beta-galactosami	ST3GAL1	NO	#N/A
ENSG00000008710	-1.32659	6.71304	138.347	6.11784e-32	8.41876e-28	9606	5310	NULL	16	16p13.3	polycystic kidney disease 1 (autosomal dominant)	protein-coding	PKD1	polycystic kidney disease 1 (autosomal dominant)	O	autosomal dominant polycystic kidney dis	PKD1	DOWN	PKD1
ENSG00000008838	0.158536	7.38061	4.98133	0.0256223	1	9606	9862	NULL	17	17q21.1	mediator complex subunit 24	protein-coding	MED24	mediator complex subunit 24	O	CRSP complex subunit 4|activator-recruit	MED24	NO	#N/A
ENSG00000008853	-0.251312	5.34636	9.24912	0.00235609	1	9606	23221	NULL	8	8p21.3	Rho-related BTB domain containing 2	protein-coding	RHOBTB2	Rho-related BTB domain containing 2	O	deleted in breast cancer 2 gene protein|	RHOBTB2	NO	#N/A
ENSG00000008869	0.237226	5.20641	5.64726	0.0174827	1	9606	54497	NULL	2	2p22.2	HEAT repeat containing 5B	protein-coding	HEATR5B	HEAT repeat containing 5B	O	HEAT repeat-containing protein 5B	HEATR5B	NO	#N/A
ENSG00000008952	0.0879782	7.12818	1.32494	0.249707	1	9606	7095	NULL	3	3q26.2	SEC62 homolog (S. cerevisiae)	protein-coding	SEC62	SEC62 homolog (S. cerevisiae)	O	hTP-1|membrane protein SEC62, S.cerevisi	SEC62	NO	#N/A
ENSG00000008988	-0.22608	8.00267	6.36616	0.0116317	1	9606	6224	NULL	8	8q12	ribosomal protein S20	protein-coding	RPS20	ribosomal protein S20	O	40S ribosomal protein S20	RPS20	NO	#N/A
ENSG00000009307	-0.239266	9.42844	8.75521	0.00308719	1	9606	7812	NULL	1	1p22	cold shock domain containing E1, RNA-binding	protein-coding	CSDE1	cold shock domain containing E1, RNA-binding	O	N-ras upstream gene protein|NRAS-related	CSDE1	NO	#N/A
ENSG00000009335	-0.201771	8.00972	9.0771	0.0025883	1	9606	9690	tcag7.998	7	7q36.3	ubiquitin protein ligase E3C	protein-coding	UBE3C	ubiquitin protein ligase E3C	O	ubiquitin-protein isopeptide ligase (E3)	UBE3C	NO	#N/A
ENSG00000009413	-0.215704	4.92691	3.0376	0.0813563	1	9606	5980	RP5-1112D6.1	6	6q21	REV3-like, polymerase (DNA directed), zeta, catalytic subunit	protein-coding	REV3L	REV3-like, polymerase (DNA directed), zeta, catalytic subunit	O	DNA polymerase zeta catalytic subunit|Re	REV3L	NO	#N/A
ENSG00000009724	0.116897	0.366041	0.176281	0.674589	1	9606	10747	NULL	1	1p36.3-p36.2	mannan-binding lectin serine peptidase 2	protein-coding	MASP2	mannan-binding lectin serine peptidase 2	O	MBL-associated plasma protein of 19 kD|M	MASP2	NO	#N/A
ENSG00000009780	0.276574	2.33459	3.30318	0.0691458	1	9606	199870	RP3-426I6.1	1	1p35.3	family with sequence similarity 76, member A	protein-coding	FAM76A	family with sequence similarity 76, member A	O	protein FAM76A	FAM76A	NO	#N/A
ENSG00000009830	-1.00904	4.59704	73.2308	1.15339e-17	1.546e-13	9606	29954	NULL	14	14q24	protein-O-mannosyltransferase 2	protein-coding	POMT2	protein-O-mannosyltransferase 2	O	dolichyl-phosphate-mannose--protein mann	POMT2	DOWN	POMT2
ENSG00000009844	-0.0323394	6.29163	0.149177	0.699323	1	9606	51534	HSPC228	6	6q24.1	Vps20-associated 1 homolog (S. cerevisiae)	protein-coding	VTA1	Vps20-associated 1 homolog (S. cerevisiae)	O	LYST-interacting protein 5|SKD1-binding	VTA1	NO	#N/A
ENSG00000009950	2.70492	0.364284	65.1959	6.78096e-16	9.01867e-12	9606	51085	NULL	7	7q11.23	MLX interacting protein-like	protein-coding	MLXIPL	MLX interacting protein-like	O	MLX-interacting protein-like|Mlx interac	MLXIPL	UP	MLXIPL
ENSG00000009954	-0.258694	8.05189	12.3413	0.00044304	1	9606	9031	NULL	7	7q11.23	bromodomain adjacent to zinc finger domain, 1B	protein-coding	BAZ1B	bromodomain adjacent to zinc finger domain, 1B	O	hWALp2|transcription factor WSTF|tyrosin	BAZ1B	NO	#N/A
ENSG00000010017	0.205121	5.54578	3.77486	0.0520283	1	9606	10048	NULL	6	6p23	RAN binding protein 9	protein-coding	RANBP9	RAN binding protein 9	O	Ran Binding Protein in the Microtubule o	RANBP9	NO	#N/A
ENSG00000010072	-0.253494	4.82466	6.71132	0.0095803	1	9606	83932	RP5-876B10.3	1	1q42.12-q43	SprT-like N-terminal domain	protein-coding	SPRTN	SprT-like N-terminal domain	O	DNA damage protein targeting VCP|DNA dam	SPRTN	NO	#N/A
ENSG00000010165	-0.269273	7.12699	9.47341	0.00208472	1	9606	51603	CGI-01	1	1q24-q25.3	methyltransferase like 13	protein-coding	METTL13	methyltransferase like 13	O	antiapoptotic protein FEAT|methyltransfe	METTL13	NO	#N/A
ENSG00000010219	-0.0152534	3.93842	0.0190024	0.890359	1	9606	8798	NULL	12	12p13.32	dual-specificity tyrosine-(Y)-phosphorylation regulated kinase 4	protein-coding	DYRK4	dual-specificity tyrosine-(Y)-phosphorylation regulated kinase 4	O	dual specificity tyrosine-phosphorylatio	DYRK4	NO	#N/A
ENSG00000010244	-0.23649	7.54541	9.20459	0.00241409	1	9606	7756	NULL	17	17q11.2	zinc finger protein 207	protein-coding	ZNF207	zinc finger protein 207	O	NULL	ZNF207	NO	#N/A
ENSG00000010256	-0.295182	7.61972	13.3639	0.000256512	1	9606	7384	NULL	3	3p21.3	ubiquinol-cytochrome c reductase core protein I	protein-coding	UQCRC1	ubiquinol-cytochrome c reductase core protein I	O	complex III subunit 1|core protein I|cyt	UQCRC1	NO	#N/A
ENSG00000010270	0.0773515	6.71616	0.99679	0.318088	1	9606	83930	UNQ855/PRO1864	7	7p14-p13	STARD3 N-terminal like	protein-coding	STARD3NL	STARD3 N-terminal like	O	MLN64 N-terminal domain homolog|STARD3 N	STARD3NL	NO	#N/A
ENSG00000010278	0.342815	6.53694	23.5236	1.23388e-06	0.0143685	9606	928	GIG2	12	12p13.3	CD9 molecule	protein-coding	CD9	CD9 molecule	O	5H9 antigen|BA-2/p24 antigen|CD9 antigen	CD9	NO	#N/A
ENSG00000010292	-0.421396	8.63869	38.9991	4.24008e-10	5.36031e-06	9606	9918	NULL	12	12p13.3	non-SMC condensin I complex, subunit D2	protein-coding	NCAPD2	non-SMC condensin I complex, subunit D2	O	XCAP-D2 homolog|chromosome condensation	NCAPD2	NO	#N/A
ENSG00000010295	-0.23963	4.9265	4.32272	0.0376067	1	9606	25900	NULL	12	12p13.3	intermediate filament family orphan 1	protein-coding	IFFO1	intermediate filament family orphan 1	O	intermediate filament-like MGC:2625	IFFO1	NO	#N/A
ENSG00000010310	0.443251	0.275347	2.39356	0.121836	1	9606	2696	NULL	19	19q13.3	gastric inhibitory polypeptide receptor	protein-coding	GIPR	gastric inhibitory polypeptide receptor	O	GIP-R|glucose-dependent insulinotropic p	GIPR	NO	#N/A
ENSG00000010318	0.864856	2.90625	36.726	1.35957e-09	1.70721e-05	9606	51533	NULL	3	3p21.1	PHD finger protein 7	protein-coding	PHF7	PHD finger protein 7	O	testis development protein NYD-SP6	PHF7	NO	#N/A
ENSG00000010322	-0.0576365	6.28434	0.552939	0.457119	1	9606	11188	NULL	3	3p21.1	nischarin	protein-coding	NISCH	nischarin	O	I-1 receptor candidate protein|I1R candi	NISCH	NO	#N/A
ENSG00000010361	0.490032	4.05916	21.1855	4.16906e-06	0.0475717	9606	80199	NULL	19	19q13.33	fuzzy planar cell polarity protein	protein-coding	FUZ	fuzzy planar cell polarity protein	O	fuzzy homolog|protein fuzzy homolog	FUZ	NO	#N/A
ENSG00000010404	0.312974	7.48727	10.358	0.00128918	1	9606	3423	NULL	X	Xq28	iduronate 2-sulfatase	protein-coding	IDS	iduronate 2-sulfatase	O	alpha-L-iduronate sulfate sulfatase|idur	IDS	NO	#N/A
ENSG00000010539	-0.157549	4.35839	2.47896	0.115379	1	9606	7752	NULL	16	16p13.3	zinc finger protein 200	protein-coding	ZNF200	zinc finger protein 200	O	NULL	ZNF200	NO	#N/A
ENSG00000010626	-0.0749041	2.5456	0.264079	0.607332	1	9606	10233	NULL	12	12p13	leucine rich repeat containing 23	protein-coding	LRRC23	leucine rich repeat containing 23	O	leucine-rich protein B7|leucine-rich rep	LRRC23	NO	#N/A
ENSG00000010704	-0.250022	3.89309	5.35391	0.0206759	1	9606	3077	NULL	6	6p21.3	hemochromatosis	protein-coding	HFE	hemochromatosis	O	MHC class I-like protein HFE|hereditary	HFE	NO	#N/A
ENSG00000010803	-0.740997	4.14523	43.8389	3.56542e-11	4.57514e-07	9606	22955	NULL	1	1p34	sex comb on midleg homolog 1 (Drosophila)	protein-coding	SCMH1	sex comb on midleg homolog 1 (Drosophila)	O	polycomb protein SCMH1	SCMH1	NO	#N/A
ENSG00000010810	0.0638559	5.97334	0.708424	0.399968	1	9606	2534	RP1-66H14.1	6	6q21	FYN oncogene related to SRC, FGR, YES	protein-coding	FYN	FYN oncogene related to SRC, FGR, YES	O	OKT3-induced calcium influx regulator|c-	FYN	NO	#N/A
ENSG00000010818	0.228292	5.31036	5.4113	0.0200068	1	9606	3097	NULL	6	6q23-q24	human immunodeficiency virus type I enhancer binding protein 2	protein-coding	HIVEP2	human immunodeficiency virus type I enhancer binding protein 2	O	MHC binding protein-2|MHC-binding protei	HIVEP2	NO	#N/A
ENSG00000011007	-0.031931	7.57458	0.222639	0.637036	1	9606	6924	MSTP059	1	1p36.1	transcription elongation factor B (SIII), polypeptide 3 (110kDa, elongin A)	protein-coding	TCEB3	transcription elongation factor B (SIII), polypeptide 3 (110kDa, elongin A)	O	RNA polymerase II transcription factor S	TCEB3	NO	#N/A
ENSG00000011009	-0.230638	6.43481	3.95023	0.046865	1	9606	11313	RP5-886K2.5	1	1p36.11	lysophospholipase II	protein-coding	LYPLA2	lysophospholipase II	O	LPL-II|acyl-protein thioesterase 2|lysoP	LYPLA2	NO	#N/A
ENSG00000011021	0.0550741	4.54926	0.345395	0.556731	1	9606	1185	RP5-934G17.1	1	1p36	chloride channel, voltage-sensitive 6	protein-coding	CLCN6	chloride channel, voltage-sensitive 6	O	chloride transport protein 6	CLCN6	NO	#N/A
ENSG00000011028	-0.41644	7.68412	23.9689	9.79055e-07	0.01145	9606	9902	NULL	17	17q23.2	mannose receptor, C type 2	protein-coding	MRC2	mannose receptor, C type 2	O	C-type lectin domain family 13 member E|	MRC2	NO	#N/A
ENSG00000011052	-0.421177	2.87178	4.40934	0.0357426	1	9606	4831	NULL	17	17q21.3	NME/NM23 nucleoside diphosphate kinase 2	protein-coding	NME2	NME/NM23 nucleoside diphosphate kinase 2	O	NDP kinase B|c-myc purine-binding transc	NME2	NO	#N/A
ENSG00000011105	-0.109391	2.31813	0.493155	0.482523	1	9606	10867	NULL	12	12p13.33-p13.32	tetraspanin 9	protein-coding	TSPAN9	tetraspanin 9	O	new EST tetraspan 5|tetraspan NET-5|tetr	TSPAN9	NO	#N/A
ENSG00000011114	0.264784	4.66555	5.69646	0.0169992	1	9606	55727	NULL	14	14q32.12	BTB (POZ) domain containing 7	protein-coding	BTBD7	BTB (POZ) domain containing 7	O	BTB/POZ domain-containing protein 7	BTBD7	NO	#N/A
ENSG00000011132	0.0743358	3.73273	0.35041	0.553881	1	9606	9546	NULL	19	19p13.3	amyloid beta (A4) precursor protein-binding, family A, member 3	protein-coding	APBA3	amyloid beta (A4) precursor protein-binding, family A, member 3	O	X11-like 2 protein|adapter protein X11ga	APBA3	NO	#N/A
ENSG00000011143	-0.333129	4.36648	10.6773	0.00108457	1	9606	54903	NULL	17	17q22	Meckel syndrome, type 1	protein-coding	MKS1	Meckel syndrome, type 1	O	FABB proteome-like protein|Meckel syndro	MKS1	NO	#N/A
ENSG00000011198	-0.0927669	4.55874	0.804143	0.369858	1	9606	51099	CGI-58	3	3p21	abhydrolase domain containing 5	protein-coding	ABHD5	abhydrolase domain containing 5	O	1-acylglycerol-3-phosphate O-acyltransfe	ABHD5	NO	#N/A
ENSG00000011243	-0.0713932	5.75622	0.448399	0.503096	1	9606	26993	HRIHFB2018	19	19p13.12	A kinase (PRKA) anchor protein 8-like	protein-coding	AKAP8L	A kinase (PRKA) anchor protein 8-like	O	A-kinase anchor protein 8-like|AKAP8-lik	AKAP8L	NO	#N/A
ENSG00000011258	-0.331699	4.6011	10.7297	0.00105429	1	9606	54799	NULL	17	17q21.33	mbt domain containing 1	protein-coding	MBTD1	mbt domain containing 1	O	MBT domain-containing protein 1	MBTD1	NO	#N/A
ENSG00000011260	-0.0729627	7.06518	0.985234	0.32091	1	9606	51096	CDABP0061	17	17q21.33	UTP18 small subunit (SSU) processome component homolog (yeast)	protein-coding	UTP18	UTP18 small subunit (SSU) processome component homolog (yeast)	O	U3 small nucleolar RNA-associated protei	UTP18	NO	#N/A
ENSG00000011275	-0.296333	7.17739	19.3898	1.06572e-05	0.119063	9606	54476	NULL	7	7p22.1	ring finger protein 216	protein-coding	RNF216	ring finger protein 216	O	E3 ubiquitin-protein ligase RNF216|triad	RNF216	NO	#N/A
ENSG00000011295	-0.0222409	4.32122	0.0513451	0.820739	1	9606	54902	NULL	17	17p12	tetratricopeptide repeat domain 19	protein-coding	TTC19	tetratricopeptide repeat domain 19	O	TPR repeat protein 19|tetratricopeptide	TTC19	NO	#N/A
ENSG00000011304	-0.405447	9.15689	34.9465	3.38885e-09	4.22521e-05	9606	5725	NULL	19	19p13.3	polypyrimidine tract binding protein 1	protein-coding	PTBP1	polypyrimidine tract binding protein 1	O	57 kDa RNA-binding protein PPTB-1|RNA-bi	PTBP1	NO	#N/A
ENSG00000011332	-0.0318202	2.6942	0.0490092	0.824796	1	9606	8193	NULL	19	19q13.2	D4, zinc and double PHD fingers family 1	protein-coding	DPF1	D4, zinc and double PHD fingers family 1	O	BRG1-associated factor 45B|neuro-d4 homo	DPF1	NO	#N/A
ENSG00000011347	1.12592	1.60755	32.8948	9.72808e-09	0.000120288	9606	9066	NULL	11	11q12-q13.1	synaptotagmin VII	protein-coding	SYT7	synaptotagmin VII	O	prostate cancer-associated protein 7|syn	SYT7	UP	SYT7
ENSG00000011376	0.00265188	5.6297	0.00112782	0.97321	1	9606	23395	NULL	3	3p21.3	leucyl-tRNA synthetase 2, mitochondrial	protein-coding	LARS2	leucyl-tRNA synthetase 2, mitochondrial	O	leucine tRNA ligase 2, mitochondrial|leu	LARS2	NO	#N/A
ENSG00000011405	0.314871	6.46328	7.67273	0.00560617	1	9606	5286	NULL	11	11p15.5-p14	phosphatidylinositol-4-phosphate 3-kinase, catalytic subunit type 2 alpha	protein-coding	PIK3C2A	phosphatidylinositol-4-phosphate 3-kinase, catalytic subunit type 2 alpha	O	C2-containing phosphatidylinositol kinas	PIK3C2A	NO	#N/A
ENSG00000011422	-0.746497	6.12711	61.5894	4.23086e-15	5.60251e-11	9606	5329	NULL	19	19q13	plasminogen activator, urokinase receptor	protein-coding	PLAUR	plasminogen activator, urokinase receptor	O	monocyte activation antigen Mo3|u-plasmi	PLAUR	NO	#N/A
ENSG00000011426	-0.152323	9.0055	2.90252	0.088441	1	9606	54443	NULL	7	7p15-p14	anillin, actin binding protein	protein-coding	ANLN	anillin, actin binding protein	O	actin-binding protein anillin	ANLN	NO	#N/A
ENSG00000011451	-0.414599	6.31387	26.4304	2.73208e-07	0.00325528	9606	58525	NULL	19	19p13.1	widely interspaced zinc finger motifs	protein-coding	WIZ	widely interspaced zinc finger motifs	O	WIZ zinc finger|protein Wiz|widely-inter	WIZ	NO	#N/A
ENSG00000011454	0.121982	6.09368	2.18781	0.139107	1	9606	23637	HSPC094	9	9q34.11	RAB GTPase activating protein 1	protein-coding	RABGAP1	RAB GTPase activating protein 1	O	GAP and centrosome-associated protein|Ra	RABGAP1	NO	#N/A
ENSG00000011465	0.73407	0.492157	7.28505	0.00695307	1	9606	1634	NULL	12	12q21.33	decorin	protein-coding	DCN	decorin	O	PG-S2|bone proteoglycan II|decorin prote	DCN	NO	#N/A
ENSG00000011478	0.336909	3.87314	10.491	0.0011996	1	9606	54814	NULL	19	19q13.32	glutaminyl-peptide cyclotransferase-like	protein-coding	QPCTL	glutaminyl-peptide cyclotransferase-like	O	glutaminyl cyclase-like|glutaminyl-pepti	QPCTL	NO	#N/A
ENSG00000011485	-0.285655	6.39777	8.57436	0.00340929	1	9606	5536	NULL	19	19q13.3	protein phosphatase 5, catalytic subunit	protein-coding	PPP5C	protein phosphatase 5, catalytic subunit	O	PP-T|protein phosphatase T|serine/threon	PPP5C	NO	#N/A
ENSG00000011523	0.518955	4.23225	27.3297	1.71558e-07	0.00205595	9606	23177	NULL	2	2p14	centrosomal protein 68kDa	protein-coding	CEP68	centrosomal protein 68kDa	O	centrosomal protein of 68 kDa	CEP68	NO	#N/A
ENSG00000011566	-0.00343886	5.04022	0.000965971	0.975206	1	9606	8491	NULL	2	2p22.1	mitogen-activated protein kinase kinase kinase kinase 3	protein-coding	MAP4K3	mitogen-activated protein kinase kinase kinase kinase 3	O	MAPK/ERK kinase kinase kinase 3|MEK kina	MAP4K3	NO	#N/A
ENSG00000011638	0.0857026	3.3402	0.511524	0.47448	1	9606	57146	NULL	16	16p12	transmembrane protein 159	protein-coding	TMEM159	transmembrane protein 159	O	promethin	TMEM159	NO	#N/A
ENSG00000011677	0.502816	3.13144	14.4626	0.000142971	1	9606	2556	NULL	X	Xq28	gamma-aminobutyric acid (GABA) A receptor, alpha 3	protein-coding	GABRA3	gamma-aminobutyric acid (GABA) A receptor, alpha 3	O	GABA(A) receptor subunit alpha-3|GABA(A)	GABRA3	NO	#N/A
ENSG00000012048	0.388911	7.20065	17.8326	2.41218e-05	0.264037	9606	672	NULL	17	17q21	breast cancer 1, early onset	protein-coding	BRCA1	breast cancer 1, early onset	O	BRCA1/BRCA2-containing complex, subunit	BRCA1	NO	#N/A
ENSG00000012061	-0.151783	5.62822	2.27245	0.131692	1	9606	2067	NULL	19	19q13.32	excision repair cross-complementing rodent repair deficiency, complementation group 1 (includes overlapping antisense sequence)	protein-coding	ERCC1	excision repair cross-complementing rodent repair deficiency, complementation group 1 (includes overlapping antisense sequence)	O	DNA excision repair protein ERCC-1	ERCC1	NO	#N/A
ENSG00000012124	1.06458	4.24952	91.5425	1.09221e-21	1.48169e-17	9606	933	NULL	19	19q13.1	CD22 molecule	protein-coding	CD22	CD22 molecule	O	B-cell receptor CD22|B-lymphocyte cell a	CD22	UP	CD22
ENSG00000012171	0.543768	4.66563	13.2093	0.00027856	1	9606	7869	NULL	3	3p21.3	sema domain, immunoglobulin domain (Ig), short basic domain, secreted, (semaphorin) 3B	protein-coding	SEMA3B	sema domain, immunoglobulin domain (Ig), short basic domain, secreted, (semaphorin) 3B	O	sema A(V)|sema V|semaphorin A|semaphorin	SEMA3B	NO	#N/A
ENSG00000012174	0.292896	6.50913	7.79865	0.00522853	1	9606	51360	NULL	X	Xp22.12-p22.11	membrane-bound transcription factor peptidase, site 2	protein-coding	MBTPS2	membrane-bound transcription factor peptidase, site 2	O	SREBPs intramembrane protease|endopeptid	MBTPS2	NO	#N/A
ENSG00000012211	0.151531	2.6598	1.1296	0.287861	1	9606	4007	NULL	X	Xp11.23	prickle homolog 3 (Drosophila)	protein-coding	PRICKLE3	prickle homolog 3 (Drosophila)	O	LIM domain only protein 6|LMO-6|prickle-	PRICKLE3	NO	#N/A
ENSG00000012232	0.0248896	6.54737	0.0986032	0.753512	1	9606	2137	NULL	8	8p21	exostosin-like glycosyltransferase 3	protein-coding	EXTL3	exostosin-like glycosyltransferase 3	O	EXT-related 1|exostoses (multiple)-like	EXTL3	NO	#N/A
ENSG00000012660	-0.356272	7.3405	23.9371	9.95366e-07	0.0116368	9606	60481	RP3-483K16.1	6	6p21.1-p12.1	ELOVL fatty acid elongase 5	protein-coding	ELOVL5	ELOVL fatty acid elongase 5	O	3-keto acyl-CoA synthase ELOVL5|ELOVL FA	ELOVL5	NO	#N/A
ENSG00000012822	0.300531	4.93148	9.13819	0.00250328	1	9606	57658	PP13275	12	12q13.13	calcium binding and coiled-coil domain 1	protein-coding	CALCOCO1	calcium binding and coiled-coil domain 1	O	calcium-binding and coiled-coil domain-c	CALCOCO1	NO	#N/A
ENSG00000012963	0.356459	6.43782	18.933	1.35389e-05	0.150498	9606	55148	NULL	14	14q32.12	ubiquitin protein ligase E3 component n-recognin 7 (putative)	protein-coding	UBR7	ubiquitin protein ligase E3 component n-recognin 7 (putative)	O	N-recognin-7|putative E3 ubiquitin-prote	UBR7	NO	#N/A
ENSG00000012983	-0.124833	5.00582	1.64668	0.199411	1	9606	11183	NULL	14	14q11.2-q21	mitogen-activated protein kinase kinase kinase kinase 5	protein-coding	MAP4K5	mitogen-activated protein kinase kinase kinase kinase 5	O	MAPK/ERK kinase kinase kinase 5|MEK kina	MAP4K5	NO	#N/A
ENSG00000013016	-0.124559	4.36987	1.38692	0.238926	1	9606	30845	NULL	2	2p21	EH-domain containing 3	protein-coding	EHD3	EH-domain containing 3	O	EH domain containing 3|EH domain-contain	EHD3	NO	#N/A
ENSG00000013275	-0.188084	7.28741	6.18601	0.0128764	1	9606	5704	NULL	19	19q13.11-q13.13	proteasome (prosome, macropain) 26S subunit, ATPase, 4	protein-coding	PSMC4	proteasome (prosome, macropain) 26S subunit, ATPase, 4	O	26S protease regulatory subunit 6B|26S p	PSMC4	NO	#N/A
ENSG00000013288	0.333196	4.696	13.1423	0.00028871	1	9606	23324	NULL	4	4p16.1	mannosidase, alpha, class 2B, member 2	protein-coding	MAN2B2	mannosidase, alpha, class 2B, member 2	O	core-specific lysosomal alpha-1,6-Mannos	MAN2B2	NO	#N/A
ENSG00000013297	0.188179	0.87669	0.650156	0.420057	1	9606	5010	NULL	3	3q26.2-q26.3	claudin 11	protein-coding	CLDN11	claudin 11	O	claudin-11|oligodendrocyte transmembrane	CLDN11	NO	#N/A
ENSG00000013306	-0.0842164	7.84743	0.871659	0.350496	1	9606	51629	CGI-69	17	17q12	solute carrier family 25, member 39	protein-coding	SLC25A39	solute carrier family 25, member 39	O	solute carrier family 25 member 39	SLC25A39	NO	#N/A
ENSG00000013364	0.0350329	6.10718	0.162588	0.686784	1	9606	9961	NULL	16	16p11.2	major vault protein	protein-coding	MVP	major vault protein	O	lung resistance-related protein	MVP	NO	#N/A
ENSG00000013374	0.313454	6.4381	15.2724	9.30668e-05	0.981017	9606	51667	NULL	7	7q36	negative regulator of ubiquitin-like proteins 1	protein-coding	NUB1	negative regulator of ubiquitin-like proteins 1	O	NEDD8 ultimate buster 1|NEDD8 ultimate b	NUB1	NO	#N/A
ENSG00000013375	0.138762	5.67014	2.17713	0.140076	1	9606	5238	NULL	6	6q14.1-q15	phosphoglucomutase 3	protein-coding	PGM3	phosphoglucomutase 3	O	N-acetylglucosamine-phosphate mutase 1|a	PGM3	NO	#N/A
ENSG00000013392	0.440619	1.89466	6.57879	0.0103201	1	9606	112611	NULL	6	6q14.2	RWD domain containing 2A	protein-coding	RWDD2A	RWD domain containing 2A	O	RWD domain containing 2|RWD domain-conta	RWDD2A	NO	#N/A
ENSG00000013441	0.27931	4.83412	8.37811	0.00379767	1	9606	1195	NULL	2	2q33	CDC-like kinase 1	protein-coding	CLK1	CDC-like kinase 1	O	CDC28/CDC2-like kinase|dual specificity	CLK1	NO	#N/A
ENSG00000013503	-0.237521	5.05587	7.91143	0.00491235	1	9606	55703	NULL	12	12q23.3	polymerase (RNA) III (DNA directed) polypeptide B	protein-coding	POLR3B	polymerase (RNA) III (DNA directed) polypeptide B	O	DNA-directed RNA polymerase III 127.6 kD	POLR3B	NO	#N/A
ENSG00000013523	0.01098	4.18313	0.00807214	0.92841	1	9606	23357	NULL	14	14q24.3	angel homolog 1 (Drosophila)	protein-coding	ANGEL1	angel homolog 1 (Drosophila)	O	protein angel homolog 1	ANGEL1	NO	#N/A
ENSG00000013561	0.381763	5.71436	14.589	0.000133692	1	9606	9604	HRIHFB2038	5	5q23.3-q31.1	ring finger protein 14	protein-coding	RNF14	ring finger protein 14	O	E3 ubiquitin-protein ligase RNF14|androg	RNF14	NO	#N/A
ENSG00000013563	0.490147	3.92555	21.0998	4.35969e-06	0.0497005	9606	1774	XX-FW83563B9.2	X	Xq28	deoxyribonuclease I-like 1	protein-coding	DNASE1L1	deoxyribonuclease I-like 1	O	DNase I-like 1|DNase I-like, muscle-spec	DNASE1L1	NO	#N/A
ENSG00000013573	-0.0887251	6.72345	1.01615	0.313435	1	9606	1663	NULL	12	12p11	DEAD/H (Asp-Glu-Ala-Asp/His) box helicase 11	protein-coding	DDX11	DEAD/H (Asp-Glu-Ala-Asp/His) box helicase 11	O	CHL1-like helicase homolog|CHL1-related	DDX11	NO	#N/A
ENSG00000013583	-0.364954	4.94841	8.97135	0.00274246	1	9606	50865	NULL	12	12p13.1	heme binding protein 1	protein-coding	HEBP1	heme binding protein 1	O	heme-binding protein 1|p22HBP	HEBP1	NO	#N/A
ENSG00000013588	0.859227	6.31087	80.495	2.91439e-19	3.92685e-15	9606	9052	NULL	12	12p13-p12.3	G protein-coupled receptor, family C, group 5, member A	protein-coding	GPRC5A	G protein-coupled receptor, family C, group 5, member A	O	G-protein coupled receptor family C grou	GPRC5A	NO	#N/A
ENSG00000013619	-0.0299395	4.37672	0.0784523	0.779406	1	9606	10046	NULL	X	Xq28	mastermind-like domain containing 1	protein-coding	MAMLD1	mastermind-like domain containing 1	O	mastermind-like domain-containing protei	MAMLD1	NO	#N/A
ENSG00000013810	-0.723474	7.5288	59.3919	1.292e-14	1.70634e-10	9606	10460	NULL	4	4p16.3	transforming, acidic coiled-coil containing protein 3	protein-coding	TACC3	transforming, acidic coiled-coil containing protein 3	O	transforming acidic coiled-coil-containi	TACC3	NO	#N/A
ENSG00000014123	-0.080281	5.43736	0.484621	0.486337	1	9606	23376	NULL	6	6q16.1	UFM1-specific ligase 1	protein-coding	UFL1	UFM1-specific ligase 1	O	E3 UFM1-protein ligase 1|LZAP-binding pr	UFL1	NO	#N/A
ENSG00000014138	-0.107519	6.14388	1.88288	0.170008	1	9606	23649	NULL	11	11q13.1	polymerase (DNA directed), alpha 2, accessory subunit	protein-coding	POLA2	polymerase (DNA directed), alpha 2, accessory subunit	O	DNA polymerase alpha 70 kDa subunit|DNA	POLA2	NO	#N/A
ENSG00000014164	-1.51784	4.62396	210.676	9.78057e-48	1.35529e-43	9606	23144	NULL	8	8q24.3	zinc finger CCCH-type containing 3	protein-coding	ZC3H3	zinc finger CCCH-type containing 3	O	zinc finger CCCH domain-containing prote	ZC3H3	DOWN	ZC3H3
ENSG00000014216	-0.338084	6.45575	17.0128	3.71296e-05	0.401853	9606	823	PIG30	11	11q13	calpain 1, (mu/I) large subunit	protein-coding	CAPN1	calpain 1, (mu/I) large subunit	O	CANP 1|calcium-activated neutral protein	CAPN1	NO	#N/A
ENSG00000014641	0.154209	7.19658	5.13856	0.0234	1	9606	4190	NULL	2	2p13.3	malate dehydrogenase 1, NAD (soluble)	protein-coding	MDH1	malate dehydrogenase 1, NAD (soluble)	O	cytosolic malate dehydrogenase|diiodophe	MDH1	NO	#N/A
ENSG00000014824	0.279196	6.84641	12.3054	0.000451655	1	9606	10463	NULL	4	4p13	solute carrier family 30 (zinc transporter), member 9	protein-coding	SLC30A9	solute carrier family 30 (zinc transporter), member 9	O	GRIP1-dependent nuclear receptor coactiv	SLC30A9	NO	#N/A
ENSG00000014914	0.602215	2.67206	16.8127	4.12559e-05	0.445069	9606	10903	NULL	1	1q12-q21	myotubularin related protein 11	protein-coding	MTMR11	myotubularin related protein 11	O	cisplatin resistance associated|cisplati	MTMR11	NO	#N/A
ENSG00000014919	0.0842694	5.37904	1.07819	0.299103	1	9606	1355	NULL	10	10q24	cytochrome c oxidase assembly homolog 15 (yeast)	protein-coding	COX15	cytochrome c oxidase assembly homolog 15 (yeast)	O	COX15 homolog, cytochrome c oxidase asse	COX15	NO	#N/A
ENSG00000015133	-0.16447	2.2168	1.06255	0.302635	1	9606	440193	NULL	14	14q32.11	coiled-coil domain containing 88C	protein-coding	CCDC88C	coiled-coil domain containing 88C	O	Dvl-associating protein with a high freq	CCDC88C	NO	#N/A
ENSG00000015153	0.203834	3.89358	1.87773	0.170592	1	9606	10138	NULL	12	12q12	YY1 associated factor 2	protein-coding	YAF2	YY1 associated factor 2	O	YY1-associated factor 2	YAF2	NO	#N/A
ENSG00000015171	-0.353659	5.98797	12.0991	0.000504449	1	9606	10771	RP11-486H9.1	10	10p14	zinc finger, MYND-type containing 11	protein-coding	ZMYND11	zinc finger, MYND-type containing 11	O	adenovirus 5 E1A-binding protein|bone mo	ZMYND11	NO	#N/A
ENSG00000015475	-0.370102	6.0683	20.4451	6.13663e-06	0.0693623	9606	637	NULL	22	22q11.1	BH3 interacting domain death agonist	protein-coding	BID	BH3 interacting domain death agonist	O	BH3-interacting domain death agonist|BID	BID	NO	#N/A
ENSG00000015479	-0.123095	8.55431	2.26843	0.132034	1	9606	9782	NULL	5	5q31.2	matrin 3	protein-coding	MATR3	matrin 3	O	matrin-3|vocal cord and pharyngeal weakn	MATR3	NO	#N/A
ENSG00000015532	-0.459089	6.14235	21.4928	3.55162e-06	0.0406376	9606	64132	UNQ3058/PRO9878	17	17q21.33	xylosyltransferase II	protein-coding	XYLT2	xylosyltransferase II	O	UDP-D-xylose:proteoglycan core protein b	XYLT2	NO	#N/A
ENSG00000015568	0.624334	3.96681	11.306	0.000772554	1	9606	84220	NULL	2	2q13	RANBP2-like and GRIP domain containing 5	protein-coding	RGPD5	RANBP2-like and GRIP domain containing 5	O	RANBP2-like and GRIP domain-containing p	RGPD5	NO	#N/A
ENSG00000015676	-0.306407	7.67209	18.6835	1.54315e-05	0.170935	9606	23386	hCG_18301	7	7p13-p12	NudC domain containing 3	protein-coding	NUDCD3	NudC domain containing 3	O	NudC-like protein|nudC domain-containing	NUDCD3	NO	#N/A
ENSG00000016402	-0.079801	2.38385	0.278759	0.597516	1	9606	53832	RP11-204P2.1	6	6q23.3	interleukin 20 receptor, alpha	protein-coding	IL20RA	interleukin 20 receptor, alpha	O	CRF2-8|IL-20 receptor subunit alpha|IL-2	IL20RA	NO	#N/A
ENSG00000016864	-0.346432	5.34312	18.8635	1.40416e-05	0.15596	9606	55830	AD-017	3	3p21.1	glycosyltransferase 8 domain containing 1	protein-coding	GLT8D1	glycosyltransferase 8 domain containing 1	O	glycosyltransferase 8 domain-containing	GLT8D1	NO	#N/A
ENSG00000017260	-0.00165021	7.58867	0.000476747	0.98258	1	9606	27032	HUSSY-28	3	3q22.1	ATPase, Ca++ transporting, type 2C, member 1	protein-coding	ATP2C1	ATPase, Ca++ transporting, type 2C, member 1	O	ATP-dependent Ca(2+) pump PMR1|ATPase 2C	ATP2C1	NO	#N/A
ENSG00000017483	0.25196	3.96404	4.06425	0.0438001	1	9606	92745	PP7194	X	Xp11.23	solute carrier family 38, member 5	protein-coding	SLC38A5	solute carrier family 38, member 5	O	sodium-coupled neutral amino acid transp	SLC38A5	NO	#N/A
ENSG00000017797	-0.026376	6.54172	0.111314	0.738654	1	9606	10928	NULL	18	18p11.3	ralA binding protein 1	protein-coding	RALBP1	ralA binding protein 1	O	76 kDa Ral-interacting protein|DNP-SG AT	RALBP1	NO	#N/A
ENSG00000018189	0.441312	5.13575	13.3363	0.000260311	1	9606	22902	NULL	4	4q13.3	RUN and FYVE domain containing 3	protein-coding	RUFY3	RUN and FYVE domain containing 3	O	protein RUFY3|rap2 interacting protein x	RUFY3	NO	#N/A
ENSG00000018236	0.16932	2.36833	1.1017	0.293893	1	9606	1272	NULL	12	12q11-q12	contactin 1	protein-coding	CNTN1	contactin 1	O	contactin-1|glycoprotein gP135|neural ce	CNTN1	NO	#N/A
ENSG00000018280	0.626797	0.127954	4.26244	0.0389638	1	9606	6556	NULL	2	2q35	solute carrier family 11 (proton-coupled divalent metal ion transporters), member 1	protein-coding	SLC11A1	solute carrier family 11 (proton-coupled divalent metal ion transporters), member 1	O	NRAMP 1|natural resistance-associated ma	SLC11A1	NO	#N/A
ENSG00000018408	-0.337962	6.68405	20.8515	4.96313e-06	0.0564209	9606	25937	NULL	3	3q23-q24	WW domain containing transcription regulator 1	protein-coding	WWTR1	WW domain containing transcription regulator 1	O	WW domain-containing transcription regul	WWTR1	NO	#N/A
ENSG00000018510	-0.0163035	6.96448	0.0413083	0.838944	1	9606	8540	AAG5	2	2q31.2	alkylglycerone phosphate synthase	protein-coding	AGPS	alkylglycerone phosphate synthase	O	aging-associated gene 5 protein|aging-as	AGPS	NO	#N/A
ENSG00000018610	0.276091	5.36834	7.89539	0.00495609	1	9606	63932	NULL	X	Xq23	chromosome X open reading frame 56	protein-coding	CXorf56	chromosome X open reading frame 56	O	UPF0428 protein CXorf56	CXorf56	NO	#N/A
ENSG00000018625	0.455387	1.52459	5.27038	0.0216913	1	9606	477	RP11-536C5.4	1	1q23.2	ATPase, Na+/K+ transporting, alpha 2 polypeptide	protein-coding	ATP1A2	ATPase, Na+/K+ transporting, alpha 2 polypeptide	O	Na(+)/K(+) ATPase alpha-2 subunit|Na+/K+	ATP1A2	NO	#N/A
ENSG00000018699	-0.205087	5.02395	5.56177	0.0183568	1	9606	55622	NULL	2	2p22.3	tetratricopeptide repeat domain 27	protein-coding	TTC27	tetratricopeptide repeat domain 27	O	TPR repeat protein 27|tetratricopeptide	TTC27	NO	#N/A
ENSG00000018869	0.106581	2.21468	0.450904	0.501906	1	9606	147948	NULL	19	19q13.43	zinc finger protein 582	protein-coding	ZNF582	zinc finger protein 582	O	NULL	ZNF582	NO	#N/A
ENSG00000019144	0.278014	5.81879	10.7262	0.00105627	1	9606	23187	DLNB07	11	11q23.3	pleckstrin homology-like domain, family B, member 1	protein-coding	PHLDB1	pleckstrin homology-like domain, family B, member 1	O	LL5alpha|pleckstrin homology-like domain	PHLDB1	NO	#N/A
ENSG00000019485	-0.216311	3.68514	3.42513	0.0642112	1	9606	56981	NULL	11	11p11	PR domain containing 11	protein-coding	PRDM11	PR domain containing 11	O	PR domain-containing protein 11|PR-domai	PRDM11	NO	#N/A
ENSG00000019505	-0.0834184	4.6656	0.59673	0.439828	1	9606	57586	NULL	11	11p12-p11	synaptotagmin XIII	protein-coding	SYT13	synaptotagmin XIII	O	synaptotagmin-13|sytXIII	SYT13	NO	#N/A
ENSG00000019549	-0.14897	4.53231	2.36326	0.124222	1	9606	6591	NULL	8	8q11	snail homolog 2 (Drosophila)	protein-coding	SNAI2	snail homolog 2 (Drosophila)	O	neural crest transcription factor SLUG|p	SNAI2	NO	#N/A
ENSG00000019991	-0.712351	7.0312	39.2535	3.72204e-10	4.71024e-06	9606	3082	NULL	7	7q21.1	hepatocyte growth factor (hepapoietin A; scatter factor)	protein-coding	HGF	hepatocyte growth factor (hepapoietin A; scatter factor)	O	fibroblast-derived tumor cytotoxic facto	HGF	NO	#N/A
ENSG00000019995	0.341023	5.30337	15.4969	8.26424e-05	0.873861	9606	54764	NULL	10	10q26.13	zinc finger, RAN-binding domain containing 1	protein-coding	ZRANB1	zinc finger, RAN-binding domain containing 1	O	TRAF-binding domain-containing protein|T	ZRANB1	NO	#N/A
ENSG00000020129	0.172828	6.7868	4.33686	0.0372956	1	9606	23154	NULL	1	1p34.3	neurochondrin	protein-coding	NCDN	neurochondrin	O	NULL	NCDN	NO	#N/A
ENSG00000020181	-0.0543212	4.49619	0.26227	0.608565	1	#N/A	#N/A	#N/A	#N/A	#N/A	#N/A	#N/A	#N/A	#N/A	#N/A	#N/A	ADGRA2	NO	#N/A
ENSG00000020256	-0.039306	4.84623	0.207631	0.648631	1	9606	55734	RP5-831D17.3	20	20q13.2	ZFP64 zinc finger protein	protein-coding	ZFP64	ZFP64 zinc finger protein	O	zinc finger protein 338|zinc finger prot	ZFP64	NO	#N/A
ENSG00000020426	-0.062885	4.15046	0.317194	0.573299	1	9606	4331	NULL	14	14q23	menage a trois homolog 1, cyclin H assembly factor (Xenopus laevis)	protein-coding	MNAT1	menage a trois homolog 1, cyclin H assembly factor (Xenopus laevis)	O	CDK-activating kinase assembly factor MA	MNAT1	NO	#N/A
ENSG00000020577	0.325387	4.63215	13.0462	0.000303905	1	9606	23034	NULL	14	14q22.2	sterile alpha motif domain containing 4A	protein-coding	SAMD4A	sterile alpha motif domain containing 4A	O	SAM domain-containing protein 4A|protein	SAMD4A	NO	#N/A
ENSG00000020922	0.19784	5.52554	5.52714	0.0187237	1	9606	4361	NULL	11	11q21	MRE11 meiotic recombination 11 homolog A (S. cerevisiae)	protein-coding	MRE11A	MRE11 meiotic recombination 11 homolog A (S. cerevisiae)	O	AT-like disease|DNA recombination and re	MRE11A	NO	#N/A
ENSG00000021300	0.785497	3.46431	44.2421	2.90167e-11	3.72748e-07	9606	58473	NULL	11	11q13.5-q14.1	pleckstrin homology domain containing, family B (evectins) member 1	protein-coding	PLEKHB1	pleckstrin homology domain containing, family B (evectins) member 1	O	PH domain containing protein in retina 1	PLEKHB1	NO	#N/A
ENSG00000021574	-0.223936	4.63393	5.35212	0.020697	1	9606	6683	NULL	2	2p24-p21	spastin	protein-coding	SPAST	spastin	O	spastic paraplegia 4 (autosomal dominant	SPAST	NO	#N/A
ENSG00000021762	-0.243685	4.11448	4.79296	0.0285762	1	9606	114879	NULL	11	11p15.4	oxysterol binding protein-like 5	protein-coding	OSBPL5	oxysterol binding protein-like 5	O	ORP-5|OSBP-related protein 5|oxysterol-b	OSBPL5	NO	#N/A
ENSG00000021776	-0.0790134	6.43335	0.514715	0.473105	1	9606	9716	NULL	15	15q14	aquarius homolog (mouse)	protein-coding	AQR	aquarius homolog (mouse)	O	functional spliceosome-associated protei	AQR	NO	#N/A
ENSG00000021826	0.0129007	5.29323	0.0144252	0.9044	1	9606	1373	NULL	2	2q35	carbamoyl-phosphate synthase 1, mitochondrial	protein-coding	CPS1	carbamoyl-phosphate synthase 1, mitochondrial	O	carbamoyl-phosphate synthase [ammonia],	CPS1	NO	#N/A
ENSG00000022267	0.40427	7.16462	27.8281	1.3259e-07	0.00159373	9606	2273	RP11-535K18.1	X	Xq26	four and a half LIM domains 1	protein-coding	FHL1	four and a half LIM domains 1	O	LIM protein SLIMMER|four and a half LIM	FHL1	NO	#N/A
ENSG00000022277	-0.146895	6.4978	3.59567	0.0579303	1	9606	51507	AD-007	20	20q13.31	replication termination factor 2 domain containing 1	protein-coding	RTFDC1	replication termination factor 2 domain containing 1	O	UPF0549 protein C20orf43|protein RTF2 ho	RTFDC1	NO	#N/A
ENSG00000022556	-0.143271	6.19616	3.584	0.0583384	1	9606	55655	XXbac-BPG230H20.8	19	19q13.42	NLR family, pyrin domain containing 2	protein-coding	NLRP2	NLR family, pyrin domain containing 2	O	NACHT, LRR and PYD containing protein 2|	NLRP2	NO	#N/A
ENSG00000022567	-0.33773	4.31452	10.1116	0.00147339	1	9606	57210	NULL	8	8q24.3	solute carrier family 45, member 4	protein-coding	SLC45A4	solute carrier family 45, member 4	O	solute carrier family 45 member 4	SLC45A4	NO	#N/A
ENSG00000022840	-0.0118091	7.44427	0.0297294	0.863106	1	9606	9921	NULL	12	12q24.31	ring finger protein 10	protein-coding	RNF10	ring finger protein 10	O	RING finger protein 10	RNF10	NO	#N/A
ENSG00000022976	-0.249226	3.50883	4.19223	0.0406096	1	9606	55778	NULL	14	14q32.31	zinc finger protein 839	protein-coding	ZNF839	zinc finger protein 839	O	renal carcinoma antigen NY-REN-50	ZNF839	NO	#N/A
ENSG00000023041	-0.0841226	5.60328	1.07293	0.300285	1	9606	64429	NULL	10	10q25.2	zinc finger, DHHC-type containing 6	protein-coding	ZDHHC6	zinc finger, DHHC-type containing 6	O	DHHC-6|palmitoyltransferase ZDHHC6|proba	ZDHHC6	NO	#N/A
ENSG00000023171	-0.293004	4.2327	6.25425	0.0123896	1	9606	57476	UNQ3032/PRO9834	11	11q24.1	GRAM domain containing 1B	protein-coding	GRAMD1B	GRAM domain containing 1B	O	GRAM domain-containing protein 1B	GRAMD1B	NO	#N/A
ENSG00000023191	-0.316771	7.95636	9.81431	0.00173159	1	9606	6050	NULL	11	11p15.5	ribonuclease/angiogenin inhibitor 1	protein-coding	RNH1	ribonuclease/angiogenin inhibitor 1	O	placental RNase inhibitor|placental ribo	RNH1	NO	#N/A
ENSG00000023228	0.0241758	7.12473	0.103782	0.747337	1	9606	4719	NULL	2	2q33-q34	NADH dehydrogenase (ubiquinone) Fe-S protein 1, 75kDa (NADH-coenzyme Q reductase)	protein-coding	NDUFS1	NADH dehydrogenase (ubiquinone) Fe-S protein 1, 75kDa (NADH-coenzyme Q reductase)	O	NADH-ubiquinone oxidoreductase 75 kDa su	NDUFS1	NO	#N/A
ENSG00000023287	0.0833909	6.11813	0.852274	0.35591	1	9606	9821	NULL	8	8q11	RB1-inducible coiled-coil 1	protein-coding	RB1CC1	RB1-inducible coiled-coil 1	O	200 kDa FAK family kinase-interacting pr	RB1CC1	NO	#N/A
ENSG00000023318	0.169216	5.57384	4.06565	0.0437637	1	9606	23071	UNQ532/PRO1075	9	9q31.1	endoplasmic reticulum protein 44	protein-coding	ERP44	endoplasmic reticulum protein 44	O	ER protein 44|endoplasmic reticulum resi	ERP44	NO	#N/A
ENSG00000023330	0.307133	5.63513	15.0234	0.000106187	1	9606	211	OK/SW-cl.121	3	3p21.1	aminolevulinate, delta-, synthase 1	protein-coding	ALAS1	aminolevulinate, delta-, synthase 1	O	5-aminolevulinate synthase, nonspecific,	ALAS1	NO	#N/A
ENSG00000023445	0.924953	5.80173	59.1042	1.4954e-14	1.97407e-10	9606	330	NULL	11	11q22	baculoviral IAP repeat containing 3	protein-coding	BIRC3	baculoviral IAP repeat containing 3	O	IAP homolog C|IAP-1|RING finger protein	BIRC3	NO	#N/A
ENSG00000023516	0.296002	6.15566	7.78683	0.00526285	1	9606	11215	NULL	13	13q14.11	A kinase (PRKA) anchor protein 11	protein-coding	AKAP11	A kinase (PRKA) anchor protein 11	O	A-kinase anchor protein 11|A-kinase anch	AKAP11	NO	#N/A
ENSG00000023572	0.0894806	4.95148	0.838297	0.359884	1	9606	51022	RP11-101E13.4	1	1q31.2	glutaredoxin 2	protein-coding	GLRX2	glutaredoxin 2	O	bA101E13.1 (GRX2 glutaredoxin (thioltran	GLRX2	NO	#N/A
ENSG00000023608	1.19749	4.99643	91.4488	1.14515e-21	1.55317e-17	9606	6617	NULL	14	14q22	small nuclear RNA activating complex, polypeptide 1, 43kDa	protein-coding	SNAPC1	small nuclear RNA activating complex, polypeptide 1, 43kDa	O	PSE-binding factor subunit gamma|PTF sub	SNAPC1	UP	SNAPC1
ENSG00000023697	0.233908	5.49204	6.44175	0.0111469	1	9606	51071	CGI-26	12	12p12.3	deoxyribose-phosphate aldolase (putative)	protein-coding	DERA	deoxyribose-phosphate aldolase (putative)	O	2-deoxy-D-ribose 5-phosphate aldolase|2-	DERA	NO	#N/A
ENSG00000023734	-0.261452	7.88098	11.9663	0.00054171	1	9606	11171	NULL	12	12p12.3	serine/threonine kinase receptor associated protein	protein-coding	STRAP	serine/threonine kinase receptor associated protein	O	MAP activator with WD repeats|WD-40 repe	STRAP	NO	#N/A
ENSG00000023839	-0.427623	0.277718	2.19472	0.138484	1	9606	1244	RP11-114F7.2	10	10q24	ATP-binding cassette, sub-family C (CFTR/MRP), member 2	protein-coding	ABCC2	ATP-binding cassette, sub-family C (CFTR/MRP), member 2	O	ATP-binding cassette sub-family C member	ABCC2	NO	#N/A
ENSG00000023902	-0.0185262	5.30042	0.0393579	0.842741	1	9606	51177	RP11-458I7.3	1	1q21.2	pleckstrin homology domain containing, family O member 1	protein-coding	PLEKHO1	pleckstrin homology domain containing, family O member 1	O	2810052M02Rik|C-Jun-binding protein|CK2	PLEKHO1	NO	#N/A
ENSG00000023909	-0.88784	5.56813	106.667	5.26716e-25	7.19389e-21	9606	2730	RP4-561L24.2	1	1p22.1	glutamate-cysteine ligase, modifier subunit	protein-coding	GCLM	glutamate-cysteine ligase, modifier subunit	O	GCS light chain|GSC light chain|gamma-EC	GCLM	NO	#N/A
ENSG00000024048	-0.0662352	5.59976	0.6002	0.438502	1	9606	23304	NULL	6	6p21.1	ubiquitin protein ligase E3 component n-recognin 2	protein-coding	UBR2	ubiquitin protein ligase E3 component n-recognin 2	O	E3 ubiquitin-protein ligase UBR2|ubiquit	UBR2	NO	#N/A
ENSG00000024422	-0.0253729	7.90044	0.122111	0.726756	1	9606	30846	NULL	19	19q13.3	EH-domain containing 2	protein-coding	EHD2	EH-domain containing 2	O	EH domain containing 2|EH domain-contain	EHD2	NO	#N/A
ENSG00000024526	-0.460063	6.14683	22.3183	2.30999e-06	0.0266388	9606	55635	NULL	1	1p31.2	DEP domain containing 1	protein-coding	DEPDC1	DEP domain containing 1	O	5830484J08Rik|DEP domain-containing prot	DEPDC1	NO	#N/A
ENSG00000024862	0.421256	3.85017	12.5456	0.000397134	1	9606	25901	RP3-509I19.10-001	6	6q23.1-q24.1	coiled-coil domain containing 28A	protein-coding	CCDC28A	coiled-coil domain containing 28A	O	chemokine C-C motif receptor-like 1 adja	CCDC28A	NO	#N/A
ENSG00000025039	0.726509	5.24198	60.0995	9.01829e-15	1.19258e-10	9606	58528	NULL	6	6q15-q16	Ras-related GTP binding D	protein-coding	RRAGD	Ras-related GTP binding D	O	Rag D protein|ras-related GTP-binding pr	RRAGD	NO	#N/A
ENSG00000025156	0.286398	5.08359	7.55898	0.00597119	1	9606	3298	NULL	6	6q22.31	heat shock transcription factor 2	protein-coding	HSF2	heat shock transcription factor 2	O	heat shock factor protein 2	HSF2	NO	#N/A
ENSG00000025293	-0.422994	6.13143	27.3685	1.6815e-07	0.00201595	9606	51230	RP5-1121G12.1	20	20q11.22-q11.23	PHD finger protein 20	protein-coding	PHF20	PHD finger protein 20	O	glioma-expressed antigen 2|hepatocellula	PHF20	NO	#N/A
ENSG00000025434	0.880582	3.4625	52.9039	3.50266e-13	4.57868e-09	9606	10062	NULL	11	11p11.2	nuclear receptor subfamily 1, group H, member 3	protein-coding	NR1H3	nuclear receptor subfamily 1, group H, member 3	O	liver X nuclear receptor alpha variant 1	NR1H3	NO	#N/A
ENSG00000025708	0.412427	2.1059	5.41971	0.0199107	1	9606	1890	NULL	22	22q13.33	thymidine phosphorylase	protein-coding	TYMP	thymidine phosphorylase	O	gliostatin|tdRPase	TYMP	NO	#N/A
ENSG00000025770	0.0462032	5.33544	0.257329	0.611961	1	9606	29781	NULL	22	22q13.33	non-SMC condensin II complex, subunit H2	protein-coding	NCAPH2	non-SMC condensin II complex, subunit H2	O	CAP-H2 subunit of the condensin II compl	NCAPH2	NO	#N/A
ENSG00000025772	0.212963	7.1433	10.388	0.0012684	1	9606	10953	NULL	20	NULL	translocase of outer mitochondrial membrane 34	protein-coding	TOMM34	translocase of outer mitochondrial membrane 34	O	hTom34|mitochondrial import receptor sub	TOMM34	NO	#N/A
ENSG00000025796	-0.114038	6.70119	2.37104	0.123604	1	9606	11231	RP1-191J18.4	6	6q21	SEC63 homolog (S. cerevisiae)	protein-coding	SEC63	SEC63 homolog (S. cerevisiae)	O	translocation protein SEC63 homolog	SEC63	NO	#N/A
ENSG00000025800	-0.0662865	7.13528	0.441143	0.506571	1	9606	23633	RP4-622L5.1	1	1p35.1	karyopherin alpha 6 (importin alpha 7)	protein-coding	KPNA6	karyopherin alpha 6 (importin alpha 7)	O	importin alpha 7 subunit|importin subuni	KPNA6	NO	#N/A
ENSG00000026025	-0.291982	11.466	19.6193	9.45105e-06	0.105852	9606	7431	RP11-124N14.1	10	10p13	vimentin	protein-coding	VIM	vimentin	O	NULL	VIM	NO	#N/A
ENSG00000026036	-1.68021	3.72201	90.3282	2.0176e-21	2.73486e-17	9606	100533107	NULL	20	20q13.33	RTEL1-TNFRSF6B readthrough (NMD candidate)	miscRNA	RTEL1-TNFRSF6B	RTEL1-TNFRSF6B readthrough (NMD candidate)	O	NULL	RTEL1-TNFRSF6B	DOWN	RTEL1-TNFRSF6B
ENSG00000026103	0.315537	2.4215	3.79573	0.0513836	1	9606	355	RP11-399O19.7	10	10q24.1	Fas (TNF receptor superfamily, member 6)	protein-coding	FAS	Fas (TNF receptor superfamily, member 6)	O	APO-1 cell surface antigen|CD95 antigen|	FAS	NO	#N/A
ENSG00000026297	0.0989957	3.58382	0.523633	0.469296	1	9606	8635	RP11-514O12.3	6	6q27	ribonuclease T2	protein-coding	RNASET2	ribonuclease T2	O	ribonuclease 6	RNASET2	NO	#N/A
ENSG00000026508	-0.311719	8.7772	23.6936	1.12957e-06	0.0131799	9606	960	AL133330.1	11	11p13	CD44 molecule (Indian blood group)	protein-coding	CD44	CD44 molecule (Indian blood group)	O	CD44 antigen|GP90 lymphocyte homing/adhe	CD44	NO	#N/A
ENSG00000026559	-0.321832	3.52871	6.62914	0.0100324	1	9606	3755	RP5-955M13.1	20	20q13	potassium voltage-gated channel, subfamily G, member 1	protein-coding	KCNG1	potassium voltage-gated channel, subfamily G, member 1	O	potassium channel KH2|potassium channel	KCNG1	NO	#N/A
ENSG00000026652	-0.227639	3.67803	3.74341	0.0530161	1	9606	56895	RP3-473J16.2	6	6q26	1-acylglycerol-3-phosphate O-acyltransferase 4	protein-coding	AGPAT4	1-acylglycerol-3-phosphate O-acyltransferase 4	O	1-AGP acyltransferase 4|1-AGPAT 4|1-acyl	AGPAT4	NO	#N/A
ENSG00000026950	-0.149893	4.054	1.2956	0.255019	1	9606	11119	RP1-45P21.1	6	6p22.1	butyrophilin, subfamily 3, member A1	protein-coding	BTN3A1	butyrophilin, subfamily 3, member A1	O	butyrophilin subfamily 3 member A1|dJ45P	BTN3A1	NO	#N/A
ENSG00000027001	0.0442527	3.52499	0.13672	0.711564	1	9606	4285	RP11-173N17.1	13	13q12	mitochondrial intermediate peptidase	protein-coding	MIPEP	mitochondrial intermediate peptidase	O	NULL	MIPEP	NO	#N/A
ENSG00000027075	1.80252	0.115003	29.6479	5.18077e-08	0.000629671	9606	5583	NULL	14	14q23.1	protein kinase C, eta	protein-coding	PRKCH	protein kinase C, eta	O	protein kinase C eta type	PRKCH	UP	PRKCH
ENSG00000027697	0.400223	4.47344	14.2182	0.000162792	1	9606	3459	RP3-503F13.3	6	6q23.3	interferon gamma receptor 1	protein-coding	IFNGR1	interferon gamma receptor 1	O	AVP, type 2|CD119 antigen|CDw119|IFN-gam	IFNGR1	NO	#N/A
ENSG00000027847	-0.188336	4.63106	3.0921	0.0786733	1	9606	11285	UNQ748/PRO1478	5	5q35.2-q35.3	xylosylprotein beta 1,4-galactosyltransferase, polypeptide 7	protein-coding	B4GALT7	xylosylprotein beta 1,4-galactosyltransferase, polypeptide 7	O	UDP-Gal:beta-GlcNAc beta-1,4-galactosylt	B4GALT7	NO	#N/A
ENSG00000027869	0.517833	0.0350427	2.72342	0.0988862	1	9606	9047	RP11-66D17.12-002	1	1q21	SH2 domain containing 2A	protein-coding	SH2D2A	SH2 domain containing 2A	O	SH2 domain protein 2A|SH2 domain-contain	SH2D2A	NO	#N/A
ENSG00000028116	-0.0790999	4.12122	0.512651	0.473993	1	9606	7444	NULL	2	2p16.1	vaccinia related kinase 2	protein-coding	VRK2	vaccinia related kinase 2	O	serine/threonine-protein kinase VRK2|vac	VRK2	NO	#N/A
ENSG00000028137	0.515359	4.34233	23.8456	1.04381e-06	0.0121969	9606	7133	NULL	1	1p36.22	tumor necrosis factor receptor superfamily, member 1B	protein-coding	TNFRSF1B	tumor necrosis factor receptor superfamily, member 1B	O	TNF-R2|TNF-RII|p75 TNF receptor|p80 TNF-	TNFRSF1B	NO	#N/A
ENSG00000028203	-0.0359522	5.96896	0.132056	0.71631	1	9606	55591	NULL	12	12q22	vezatin, adherens junctions transmembrane protein	protein-coding	VEZT	vezatin, adherens junctions transmembrane protein	O	vezatin	VEZT	NO	#N/A
ENSG00000028310	-1.52482	5.38223	188.977	5.31548e-43	7.35503e-39	9606	65980	UNQ3040/PRO9856	5	5p15.33	bromodomain containing 9	protein-coding	BRD9	bromodomain containing 9	O	bromodomain-containing protein 9|rhabdom	BRD9	DOWN	BRD9
ENSG00000028528	0.134855	6.86344	4.0709	0.0436279	1	9606	6642	NULL	15	15q22.31	sorting nexin 1	protein-coding	SNX1	sorting nexin 1	O	sorting nexin 1A|sorting nexin-1	SNX1	NO	#N/A
ENSG00000028839	0.367442	5.05735	14.5555	0.00013609	1	9606	9519	RP1-73H22.1	6	6q22.1-q22.3	TBP-like 1	protein-coding	TBPL1	TBP-like 1	O	21-kDA TBP-like protein|TATA box-binding	TBPL1	NO	#N/A
ENSG00000029153	-0.0979598	6.6605	1.22958	0.267489	1	9606	56938	NULL	12	12p12.2-p11.2	aryl hydrocarbon receptor nuclear translocator-like 2	protein-coding	ARNTL2	aryl hydrocarbon receptor nuclear translocator-like 2	O	CYCLE-like factor|PAS domain-containing	ARNTL2	NO	#N/A
ENSG00000029363	-0.31484	7.95764	10.8333	0.000996891	1	9606	9774	NULL	6	6q22-q23	BCL2-associated transcription factor 1	protein-coding	BCLAF1	BCL2-associated transcription factor 1	O	bcl-2-associated transcription factor 1	BCLAF1	NO	#N/A
ENSG00000029364	-0.126351	6.29814	2.51883	0.112494	1	9606	55334	UNQ714/PRO1377	14	14q24.1	solute carrier family 39 (zinc transporter), member 9	protein-coding	SLC39A9	solute carrier family 39 (zinc transporter), member 9	O	zinc transporter SLC39A9|zinc transporte	SLC39A9	NO	#N/A
ENSG00000029534	-1.38754	1.97008	62.6401	2.48147e-15	3.29068e-11	9606	286	NULL	8	8p11.1	ankyrin 1, erythrocytic	protein-coding	ANK1	ankyrin 1, erythrocytic	O	ANK-1|ankyrin-1|ankyrin-R|erythrocyte an	ANK1	DOWN	ANK1
ENSG00000029639	-0.554	3.00532	18.7444	1.49462e-05	0.165753	9606	51106	CGI-75	6	6q25.1-q25.3	transcription factor B1, mitochondrial	protein-coding	TFB1M	transcription factor B1, mitochondrial	O	S-adenosylmethionine-6-N', N'-adenosyl(r	TFB1M	NO	#N/A
ENSG00000029725	0.101041	6.36184	1.44806	0.22884	1	9606	9135	NULL	17	17p13.2	rabaptin, RAB GTPase binding effector protein 1	protein-coding	RABEP1	rabaptin, RAB GTPase binding effector protein 1	O	neurocrescin|rab GTPase-binding effector	RABEP1	NO	#N/A
ENSG00000029993	-0.71485	5.3167	54.5447	1.51949e-13	1.99205e-09	9606	3149	NULL	X	Xq28	high mobility group box 3	protein-coding	HMGB3	high mobility group box 3	O	high mobility group protein 2a|high mobi	HMGB3	NO	#N/A
ENSG00000030066	0.00614487	7.36772	0.00550612	0.940849	1	9606	23279	NULL	11	11p11.2	nucleoporin 160kDa	protein-coding	NUP160	nucleoporin 160kDa	O	160 kDa nucleoporin|nuclear pore complex	NUP160	NO	#N/A
ENSG00000030110	-0.40925	4.34041	12.063	0.000514331	1	9606	578	NULL	6	6p21.3	BCL2-antagonist/killer 1	protein-coding	BAK1	BCL2-antagonist/killer 1	O	BCL2-like 7 protein|apoptosis regulator	BAK1	NO	#N/A
ENSG00000030419	0.00316647	1.25303	0.000234092	0.987793	1	9606	22807	NULL	2	2q34	IKAROS family zinc finger 2 (Helios)	protein-coding	IKZF2	IKAROS family zinc finger 2 (Helios)	O	ikaros family zinc finger protein 2|zinc	IKZF2	NO	#N/A
ENSG00000030582	0.248414	8.56394	9.30478	0.00228557	1	9606	2896	NULL	17	17q21.32	granulin	protein-coding	GRN	granulin	O	PC cell-derived growth factor|acrogranin	GRN	NO	#N/A
ENSG00000031003	0.261485	6.35206	6.62971	0.0100291	1	9606	51306	NULL	5	5q31	family with sequence similarity 13, member B	protein-coding	FAM13B	family with sequence similarity 13, member B	O	GAP-like protein N61|family with sequenc	FAM13B	NO	#N/A
ENSG00000031081	-0.0144972	5.93326	0.0339728	0.853765	1	9606	57514	NULL	3	3q13.33	Rho GTPase activating protein 31	protein-coding	ARHGAP31	Rho GTPase activating protein 31	O	Cdc42 GTPase-activating protein|rho GTPa	ARHGAP31	NO	#N/A
ENSG00000031691	0.317727	4.38312	10.5611	0.00115495	1	9606	55166	NULL	6	6p12.3	centromere protein Q	protein-coding	CENPQ	centromere protein Q	O	NULL	CENPQ	NO	#N/A
ENSG00000031698	-0.301506	6.64683	14.0175	0.000181113	1	9606	6301	RP11-352P4.2	1	1p13.3	seryl-tRNA synthetase	protein-coding	SARS	seryl-tRNA synthetase	O	Seryl-tRNA Ser/Sec synthetase|serine tRN	SARS	NO	#N/A
ENSG00000031823	-0.367171	6.31251	18.7405	1.49766e-05	0.166046	9606	8498	NULL	19	19p13.3	RAN binding protein 3	protein-coding	RANBP3	RAN binding protein 3	O	RAN-binding protein-3|ran-binding protei	RANBP3	NO	#N/A
ENSG00000032219	-0.075077	3.16802	0.346099	0.55633	1	9606	5926	NULL	14	14q23.1	AT rich interactive domain 4A (RBP1-like)	protein-coding	ARID4A	AT rich interactive domain 4A (RBP1-like)	O	ARID domain-containing protein 4A|AT-ric	ARID4A	NO	#N/A
ENSG00000032389	0.0687497	5.35415	0.68646	0.407371	1	9606	7260	NULL	2	2p25.3	tumor suppressing subtransferable candidate 1	protein-coding	TSSC1	tumor suppressing subtransferable candidate 1	O	protein TSSC1|tumor-suppressing STF cDNA	TSSC1	NO	#N/A
ENSG00000032444	-0.254352	6.18248	7.54774	0.00600855	1	9606	10908	NULL	19	19p13.2	patatin-like phospholipase domain containing 6	protein-coding	PNPLA6	patatin-like phospholipase domain containing 6	O	neuropathy target esterase|patatin-like	PNPLA6	NO	#N/A
ENSG00000032742	0.119724	2.82347	0.737836	0.390355	1	9606	8100	RP11-172H24.2	13	13q12.1	intraflagellar transport 88 homolog (Chlamydomonas)	protein-coding	IFT88	intraflagellar transport 88 homolog (Chlamydomonas)	O	TPR repeat protein 10|intraflagellar tra	IFT88	NO	#N/A
ENSG00000033011	-0.161799	5.26963	2.58436	0.107924	1	9606	56052	PSEC0061	16	16p13.3	ALG1, chitobiosyldiphosphodolichol beta-mannosyltransferase	protein-coding	ALG1	ALG1, chitobiosyldiphosphodolichol beta-mannosyltransferase	O	GDP-Man:GlcNAc2-PP-dolichol mannosyltran	ALG1	NO	#N/A
ENSG00000033030	-0.0636755	5.18052	0.507716	0.476129	1	9606	55596	NULL	12	12q24.31	zinc finger, CCHC domain containing 8	protein-coding	ZCCHC8	zinc finger, CCHC domain containing 8	O	zinc finger CCHC domain-containing prote	ZCCHC8	NO	#N/A
ENSG00000033050	-0.369075	7.18393	26.6346	2.45798e-07	0.00293212	9606	10061	HUSSY-18	7	7q36	ATP-binding cassette, sub-family F (GCN20), member 2	protein-coding	ABCF2	ATP-binding cassette, sub-family F (GCN20), member 2	O	ABC-type transport protein|ATP-binding c	ABCF2	NO	#N/A
ENSG00000033100	-0.560669	7.08109	63.5411	1.57053e-15	2.0852e-11	9606	54480	UNQ299/PRO339	7	7q36.1	chondroitin polymerizing factor 2	protein-coding	CHPF2	chondroitin polymerizing factor 2	O	N-acetylgalactosaminyl-proteoglycan 3-be	CHPF2	NO	#N/A
ENSG00000033170	-0.891008	3.90737	66.6562	3.23237e-16	4.30616e-12	9606	2530	NULL	14	14q24.3	fucosyltransferase 8 (alpha (1,6) fucosyltransferase)	protein-coding	FUT8	fucosyltransferase 8 (alpha (1,6) fucosyltransferase)	O	GDP-L-Fuc:N-acetyl-beta-D-glucosaminide	FUT8	NO	#N/A
ENSG00000033178	-0.0147234	7.26734	0.0316638	0.858767	1	9606	55236	NULL	4	4q13.2	ubiquitin-like modifier activating enzyme 6	protein-coding	UBA6	ubiquitin-like modifier activating enzyme 6	O	UBA6, ubiquitin-activating enzyme E1|mon	UBA6	NO	#N/A
ENSG00000033327	-0.0316752	4.27979	0.0881021	0.766604	1	9606	9846	NULL	11	11q14.1	GRB2-associated binding protein 2	protein-coding	GAB2	GRB2-associated binding protein 2	O	GRB2-associated-binding protein 2|Grb2-a	GAB2	NO	#N/A
ENSG00000033627	0.537399	5.81003	41.9127	9.54387e-11	1.21856e-06	9606	535	NULL	17	17q21	ATPase, H+ transporting, lysosomal V0 subunit a1	protein-coding	ATP6V0A1	ATPase, H+ transporting, lysosomal V0 subunit a1	O	ATPase, H+ transporting, lysosomal (vacu	ATP6V0A1	NO	#N/A
ENSG00000033800	-0.0100177	5.50536	0.0103408	0.919003	1	9606	8554	NULL	15	15q	protein inhibitor of activated STAT, 1	protein-coding	PIAS1	protein inhibitor of activated STAT, 1	O	AR interacting protein|DEAD/H (Asp-Glu-A	PIAS1	NO	#N/A
ENSG00000033867	0.191439	5.81841	3.68622	0.0548639	1	9606	9497	NULL	3	3p22	solute carrier family 4, sodium bicarbonate cotransporter, member 7	protein-coding	SLC4A7	solute carrier family 4, sodium bicarbonate cotransporter, member 7	O	bicarbonate transporter|sodium bicarbona	SLC4A7	NO	#N/A
ENSG00000034053	-0.688832	4.97917	40.7718	1.71083e-10	2.17498e-06	9606	321	NULL	15	15q11-q12	amyloid beta (A4) precursor protein-binding, family A, member 2	protein-coding	APBA2	amyloid beta (A4) precursor protein-binding, family A, member 2	O	X11-like protein|adapter protein X11beta	APBA2	NO	#N/A
ENSG00000034152	-0.202467	6.64463	5.87401	0.015366	1	9606	5606	NULL	17	17q11.2	mitogen-activated protein kinase kinase 3	protein-coding	MAP2K3	mitogen-activated protein kinase kinase 3	O	MAP kinase kinase 3|MAPK/ERK kinase 3|MA	MAP2K3	NO	#N/A
ENSG00000034239	0.451497	0.606444	3.07551	0.0794795	1	9606	79645	NULL	8	8q11.21	EF-hand calcium binding domain 1	protein-coding	EFCAB1	EF-hand calcium binding domain 1	O	EF-hand calcium-binding domain-containin	EFCAB1	NO	#N/A
ENSG00000034510	-0.283103	8.6656	4.39065	0.0361365	1	9606	9168	NULL	2	2p11.2	thymosin beta 10	protein-coding	TMSB10	thymosin beta 10	O	migration-inducing gene 12|migration-ind	TMSB10	NO	#N/A
ENSG00000034533	0.262906	3.26728	3.89294	0.0484895	1	9606	28990	HT001	3	3q22.1	asteroid homolog 1 (Drosophila)	protein-coding	ASTE1	asteroid homolog 1 (Drosophila)	O	protein asteroid homolog 1	ASTE1	NO	#N/A
ENSG00000034677	0.644237	4.41079	36.5312	1.50243e-09	1.8854e-05	9606	25897	NULL	8	8q22	ring finger protein 19A, E3 ubiquitin protein ligase	protein-coding	RNF19A	ring finger protein 19A, E3 ubiquitin protein ligase	O	E3 ubiquitin-protein ligase RNF19A|RING	RNF19A	NO	#N/A
ENSG00000034693	0.275785	4.15055	6.64806	0.00992637	1	9606	8504	RP1-20N2.3	6	6q24.2	peroxisomal biogenesis factor 3	protein-coding	PEX3	peroxisomal biogenesis factor 3	O	peroxin-3|peroxisomal assembly protein P	PEX3	NO	#N/A
ENSG00000034713	0.113451	6.25902	2.05844	0.151365	1	9606	11345	NULL	16	16q22.1	GABA(A) receptor-associated protein-like 2	protein-coding	GABARAPL2	GABA(A) receptor-associated protein-like 2	O	MAP1 light chain 3 related protein|MAP1	GABARAPL2	NO	#N/A
ENSG00000035115	0.28863	4.04182	7.54746	0.00600947	1	9606	26751	NULL	2	2p25.3	SH3 domain containing, Ysc84-like 1 (S. cerevisiae)	protein-coding	SH3YL1	SH3 domain containing, Ysc84-like 1 (S. cerevisiae)	O	SH3 domain-containing YSC84-like protein	SH3YL1	NO	#N/A
ENSG00000035141	-0.341883	5.70842	11.6491	0.000642345	1	9606	84908	NULL	2	2p13.3	family with sequence similarity 136, member A	protein-coding	FAM136A	family with sequence similarity 136, member A	O	protein FAM136A	FAM136A	NO	#N/A
ENSG00000035403	-0.0765942	7.04375	0.91945	0.337619	1	9606	7414	RP11-178G16.3	10	10q22.2	vinculin	protein-coding	VCL	vinculin	O	metavinculin	VCL	NO	#N/A
ENSG00000035499	-0.0884282	4.84995	0.791417	0.373672	1	9606	55789	NULL	5	5q12.1	DEP domain containing 1B	protein-coding	DEPDC1B	DEP domain containing 1B	O	DEP domain-containing protein 1B|HBV X-t	DEPDC1B	NO	#N/A
ENSG00000035664	0.415758	0.608964	2.51936	0.112456	1	9606	23604	NULL	15	15q22.31	death-associated protein kinase 2	protein-coding	DAPK2	death-associated protein kinase 2	O	DAP kinase 2|DAP-kinase-related protein	DAPK2	NO	#N/A
ENSG00000035681	-0.109477	5.80338	1.86992	0.171485	1	9606	8439	NULL	8	8q12-q13	neutral sphingomyelinase (N-SMase) activation associated factor	protein-coding	NSMAF	neutral sphingomyelinase (N-SMase) activation associated factor	O	factor associated with N-SMase activatio	NSMAF	NO	#N/A
ENSG00000035687	-0.0491475	6.93253	0.458259	0.498439	1	9606	159	RP11-518L10.4	1	1q44	adenylosuccinate synthase	protein-coding	ADSS	adenylosuccinate synthase	O	AMPSase 2|IMP--aspartate ligase 2|L-type	ADSS	NO	#N/A
ENSG00000035862	0.118644	9.89786	3.25177	0.0713463	1	9606	7077	NULL	17	17q25	TIMP metallopeptidase inhibitor 2	protein-coding	TIMP2	TIMP metallopeptidase inhibitor 2	O	TIMP-2|metalloproteinase inhibitor 2|tis	TIMP2	NO	#N/A
ENSG00000035928	0.0384343	7.02317	0.2094	0.647238	1	9606	5981	NULL	4	4p14-p13	replication factor C (activator 1) 1, 145kDa	protein-coding	RFC1	replication factor C (activator 1) 1, 145kDa	O	A1 140 kDa subunit|DNA-binding protein P	RFC1	NO	#N/A
ENSG00000036054	0.106436	5.61743	1.29623	0.254903	1	9606	55773	NULL	3	3q12.2	TBC1 domain family, member 23	protein-coding	TBC1D23	TBC1 domain family, member 23	O	HCV non-structural protein 4A-transactiv	TBC1D23	NO	#N/A
ENSG00000036257	-0.300135	7.21542	9.67674	0.00186616	1	9606	8452	NULL	2	2q36.2	cullin 3	protein-coding	CUL3	cullin 3	O	cullin-3	CUL3	NO	#N/A
ENSG00000036549	0.1105	5.92572	1.53769	0.214961	1	9606	26009	NULL	1	1p31.1	zinc finger, ZZ-type containing 3	protein-coding	ZZZ3	zinc finger, ZZ-type containing 3	O	ATAC component 1 homolog|ZZ-type zinc fi	ZZZ3	NO	#N/A
ENSG00000036672	0.441368	2.12382	6.81325	0.00904839	1	9606	9099	NULL	11	11q23.3	ubiquitin specific peptidase 2	protein-coding	USP2	ubiquitin specific peptidase 2	O	41 kDa ubiquitin-specific protease|deubi	USP2	NO	#N/A
ENSG00000037042	-0.146413	4.05147	1.39713	0.237205	1	9606	27175	NULL	17	17q21	tubulin, gamma 2	protein-coding	TUBG2	tubulin, gamma 2	O	gamma-2-tubulin|tubulin gamma-2 chain	TUBG2	NO	#N/A
ENSG00000037241	-0.576025	5.3216	28.1393	1.12887e-07	0.00135939	9606	51121	NULL	5	5q35.1	ribosomal protein L26-like 1	protein-coding	RPL26L1	ribosomal protein L26-like 1	O	60S ribosomal protein L26-like 1|ribosom	RPL26L1	NO	#N/A
ENSG00000037474	-0.314806	7.32827	21.562	3.42565e-06	0.0392149	9606	54888	NULL	5	5p15.31	NOP2/Sun RNA methyltransferase family, member 2	protein-coding	NSUN2	NOP2/Sun RNA methyltransferase family, member 2	O	5-methycytoisine methyltransferase|Myc-i	NSUN2	NO	#N/A
ENSG00000037637	-0.0832062	4.84643	0.903079	0.341957	1	9606	54455	NULL	1	1p36.23-p36.11	F-box protein 42	protein-coding	FBXO42	F-box protein 42	O	F-box only protein 42|just one F-box and	FBXO42	NO	#N/A
ENSG00000037749	0.241585	5.20649	7.55182	0.00599495	1	9606	4238	NULL	5	5q32-q33.2	microfibrillar-associated protein 3	protein-coding	MFAP3	microfibrillar-associated protein 3	O	microfibril-associated glycoprotein 3	MFAP3	NO	#N/A
ENSG00000037757	0.0757804	4.42779	0.46657	0.494569	1	9606	84245	UNQ6390/PRO21135	19	19p13.2	methylthioribose-1-phosphate isomerase homolog (S. cerevisiae)	protein-coding	MRI1	methylthioribose-1-phosphate isomerase homolog (S. cerevisiae)	O	M1Pi|MTR-1-P isomerase|S-methyl-5-thiori	MRI1	NO	#N/A
ENSG00000037897	-0.164959	4.45103	2.0456	0.152646	1	9606	4234	NULL	12	12q13	methyltransferase like 1	protein-coding	METTL1	methyltransferase like 1	O	D1075-like gene product|methyltransferas	METTL1	NO	#N/A
ENSG00000038002	0.252968	4.67964	7.49807	0.00617651	1	9606	175	NULL	4	4q34.3	aspartylglucosaminidase	protein-coding	AGA	aspartylglucosaminidase	O	N(4)-(beta-N-acetylglucosaminyl)-L-aspar	AGA	NO	#N/A
ENSG00000038210	-0.52944	4.63774	29.7608	4.88773e-08	0.000594495	9606	55300	NULL	4	4p15.2	phosphatidylinositol 4-kinase type 2 beta	protein-coding	PI4K2B	phosphatidylinositol 4-kinase type 2 beta	O	PI4KII-BETA|phosphatidylinositol 4-kinas	PI4K2B	NO	#N/A
ENSG00000038219	0.064969	7.13688	0.353505	0.552136	1	9606	259282	NULL	4	4p16.1	biorientation of chromosomes in cell division 1-like 1	protein-coding	BOD1L1	biorientation of chromosomes in cell division 1-like 1	O	biorientation of chromosomes in cell div	BOD1L1	NO	#N/A
ENSG00000038274	0.244038	6.34185	9.08387	0.00257874	1	9606	27430	MSTP045	5	5q34-q35	methionine adenosyltransferase II, beta	protein-coding	MAT2B	methionine adenosyltransferase II, beta	O	MAT II beta|beta regulatory subunit of m	MAT2B	NO	#N/A
ENSG00000038358	-0.143787	6.43437	3.84663	0.0498461	1	9606	23644	NULL	16	16q22.1	enhancer of mRNA decapping 4	protein-coding	EDC4	enhancer of mRNA decapping 4	O	autoantigen Ge-1|autoantigen RCD-8|enhan	EDC4	NO	#N/A
ENSG00000038382	-0.557023	7.20122	41.6814	1.07427e-10	1.37066e-06	9606	7204	NULL	5	5p15.2	trio Rho guanine nucleotide exchange factor	protein-coding	TRIO	trio Rho guanine nucleotide exchange factor	O	PTPRF-interacting protein|triple functio	TRIO	NO	#N/A
ENSG00000038427	0.501658	3.13973	14.5709	0.000134982	1	9606	1462	NULL	5	5q14.3	versican	protein-coding	VCAN	versican	O	chondroitin sulfate proteoglycan 2|chond	VCAN	NO	#N/A
ENSG00000038532	-0.209646	6.07214	6.60655	0.0101604	1	9606	23274	NULL	16	16p13.13	C-type lectin domain family 16, member A	protein-coding	CLEC16A	C-type lectin domain family 16, member A	O	protein CLEC16A	CLEC16A	NO	#N/A
ENSG00000039123	-0.0227186	6.89254	0.0536715	0.816793	1	9606	23517	NULL	5	5q11.2	superkiller viralicidic activity 2-like 2 (S. cerevisiae)	protein-coding	SKIV2L2	superkiller viralicidic activity 2-like 2 (S. cerevisiae)	O	ATP-dependent helicase SKIV2L2|functiona	SKIV2L2	NO	#N/A
ENSG00000039319	0.257344	5.17163	4.546	0.0329958	1	9606	9765	NULL	5	5q14	zinc finger, FYVE domain containing 16	protein-coding	ZFYVE16	zinc finger, FYVE domain containing 16	O	endosome-associated FYVE domain protein|	ZFYVE16	NO	#N/A
ENSG00000039523	-0.0330387	6.15404	0.16206	0.687267	1	9606	79567	NULL	16	16q22.1	family with sequence similarity 65, member A	protein-coding	FAM65A	family with sequence similarity 65, member A	O	protein FAM65A	FAM65A	NO	#N/A
ENSG00000039560	-0.101017	6.98272	1.53247	0.215742	1	9606	26064	NULL	5	5p13.3-p13.2	retinoic acid induced 14	protein-coding	RAI14	retinoic acid induced 14	O	ankycorbin|ankyrin repeat and coiled-coi	RAI14	NO	#N/A
ENSG00000039650	-0.124775	4.96689	1.20107	0.273107	1	9606	11284	NULL	19	19q13.3-q13.4	polynucleotide kinase 3'-phosphatase	protein-coding	PNKP	polynucleotide kinase 3'-phosphatase	O	DNA 5'-kinase/3'-phosphatase|Homo sapien	PNKP	NO	#N/A
ENSG00000040199	-0.137049	4.67137	1.60096	0.205767	1	9606	23035	NULL	16	16q22.2	PH domain and leucine rich repeat protein phosphatase 2	protein-coding	PHLPP2	PH domain and leucine rich repeat protein phosphatase 2	O	PH domain leucine-rich repeat-containing	PHLPP2	NO	#N/A
ENSG00000040275	0.200983	6.00397	5.36145	0.0205867	1	9606	54908	NULL	5	5q35.1	spindle apparatus coiled-coil protein 1	protein-coding	SPDL1	spindle apparatus coiled-coil protein 1	O	arsenite-related gene 1 protein|coiled-c	SPDL1	NO	#N/A
ENSG00000040341	0.150081	4.60872	2.62588	0.105135	1	9606	27067	NULL	8	8q21.11	staufen, RNA binding protein, homolog 2 (Drosophila)	protein-coding	STAU2	staufen, RNA binding protein, homolog 2 (Drosophila)	O	double-stranded RNA-binding protein Stau	STAU2	NO	#N/A
ENSG00000040487	0.172754	4.38007	2.57118	0.108827	1	9606	54896	RP4-657E11.5	1	1p36.13	PQ loop repeat containing 2	protein-coding	PQLC2	PQ loop repeat containing 2	O	PQ-loop repeat-containing protein 2|lyso	PQLC2	NO	#N/A
ENSG00000040531	-0.102444	3.81476	0.854454	0.355295	1	9606	1497	NULL	17	17p13	cystinosin, lysosomal cystine transporter	protein-coding	CTNS	cystinosin, lysosomal cystine transporter	O	cystinosin	CTNS	NO	#N/A
ENSG00000040633	-0.381158	5.01232	13.3853	0.000253611	1	9606	79142	NULL	17	17p13.1	PHD finger protein 23	protein-coding	PHF23	PHD finger protein 23	O	PDH-containing protein JUNE-1|PHD finger	PHF23	NO	#N/A
ENSG00000040933	-0.0847424	5.58995	0.562284	0.453341	1	9606	3631	NULL	2	2q11.2	inositol polyphosphate-4-phosphatase, type I, 107kDa	protein-coding	INPP4A	inositol polyphosphate-4-phosphatase, type I, 107kDa	O	type I inositol 3,4-bisphosphate 4-phosp	INPP4A	NO	#N/A
ENSG00000041353	0.724166	4.54344	38.8328	4.6171e-10	5.83463e-06	9606	5874	NULL	18	18q21.2	RAB27B, member RAS oncogene family	protein-coding	RAB27B	RAB27B, member RAS oncogene family	O	ras-related protein Rab-27B	RAB27B	NO	#N/A
ENSG00000041357	-0.0602368	7.31181	0.705648	0.400892	1	9606	5685	NULL	15	15q25.1	proteasome (prosome, macropain) subunit, alpha type, 4	protein-coding	PSMA4	proteasome (prosome, macropain) subunit, alpha type, 4	O	macropain subunit C9|multicatalytic endo	PSMA4	NO	#N/A
ENSG00000041802	-0.0919218	6.51175	1.36401	0.242844	1	9606	55341	NULL	3	3q29	large subunit GTPase 1 homolog (S. cerevisiae)	protein-coding	LSG1	large subunit GTPase 1 homolog (S. cerevisiae)	O	hLsg1|large subunit GTPase 1 homolog	LSG1	NO	#N/A
ENSG00000041880	-0.173247	4.46197	2.58191	0.108091	1	9606	10039	NULL	3	3p21.31-p21.1	poly (ADP-ribose) polymerase family, member 3	protein-coding	PARP3	poly (ADP-ribose) polymerase family, member 3	O	ADP-ribosyltransferase (NAD+; poly (ADP-	PARP3	NO	#N/A
ENSG00000041982	-0.81995	5.92061	85.9117	1.88152e-20	2.544e-16	9606	3371	NULL	9	9q33	tenascin C	protein-coding	TNC	tenascin C	O	GP 150-225|cytotactin|glioma-associated-	TNC	NO	#N/A
ENSG00000041988	-0.0474683	3.27483	0.0826549	0.773731	1	9606	90326	NULL	1	1p36.31	THAP domain containing, apoptosis associated protein 3	protein-coding	THAP3	THAP domain containing, apoptosis associated protein 3	O	THAP domain-containing protein 3	THAP3	NO	#N/A
ENSG00000042088	-0.0191387	4.61788	0.0399757	0.841528	1	9606	55775	NULL	14	14q32.11	tyrosyl-DNA phosphodiesterase 1	protein-coding	TDP1	tyrosyl-DNA phosphodiesterase 1	O	tyr-DNA phosphodiesterase 1	TDP1	NO	#N/A
ENSG00000042286	-0.180823	4.83205	2.04435	0.152773	1	9606	84883	NULL	10	10q22.1	apoptosis-inducing factor, mitochondrion-associated, 2	protein-coding	AIFM2	apoptosis-inducing factor, mitochondrion-associated, 2	O	apoptosis-inducing factor (AIF)-homologo	AIFM2	NO	#N/A
ENSG00000042317	-0.17367	1.51215	0.793922	0.372917	1	9606	55812	NULL	14	14q31.3	spermatogenesis associated 7	protein-coding	SPATA7	spermatogenesis associated 7	O	spermatogenesis-associated protein 7|spe	SPATA7	NO	#N/A
ENSG00000042429	-0.228867	5.96851	8.66985	0.00323518	1	9606	9440	NULL	11	11q14	mediator complex subunit 17	protein-coding	MED17	mediator complex subunit 17	O	ARC77|CRSP complex subunit 6|activator-r	MED17	NO	#N/A
ENSG00000042445	-0.436722	4.74242	24.7807	6.42359e-07	0.00756185	9606	54884	UNQ439/PRO872	2	2p11.2	retinol saturase (all-trans-retinol 13,14-reductase)	protein-coding	RETSAT	retinol saturase (all-trans-retinol 13,14-reductase)	O	PPAR-alpha-regulated and starvation-indu	RETSAT	NO	#N/A
ENSG00000042493	-0.189807	7.30304	2.10278	0.147032	1	9606	822	NULL	2	2p11.2	capping protein (actin filament), gelsolin-like	protein-coding	CAPG	capping protein (actin filament), gelsolin-like	O	actin regulatory protein CAP-G|actin-reg	CAPG	NO	#N/A
ENSG00000042753	-0.036773	7.25717	0.115145	0.734361	1	9606	1175	NULL	19	19q13.2-q13.3	adaptor-related protein complex 2, sigma 1 subunit	protein-coding	AP2S1	adaptor-related protein complex 2, sigma 1 subunit	O	AP-2 complex subunit sigma|HA2 17 kDa su	AP2S1	NO	#N/A
ENSG00000043093	-0.00841909	6.04025	0.0107616	0.917377	1	9606	54165	NULL	3	3q26.3	DCN1, defective in cullin neddylation 1, domain containing 1 (S. cerevisiae)	protein-coding	DCUN1D1	DCN1, defective in cullin neddylation 1, domain containing 1 (S. cerevisiae)	O	DCN1-like protein 1|DCUN1 domain-contain	DCUN1D1	NO	#N/A
ENSG00000043143	-0.520294	5.75303	32.0155	1.52948e-08	0.00018834	#N/A	#N/A	#N/A	#N/A	#N/A	#N/A	#N/A	#N/A	#N/A	#N/A	#N/A	JADE2	NO	#N/A
ENSG00000043514	-0.12133	4.36506	1.58688	0.207773	1	9606	54802	RP1-118J21.3	1	1p34.2	tRNA isopentenyltransferase 1	protein-coding	TRIT1	tRNA isopentenyltransferase 1	O	IPP transferase|IPPT|IPTase|hGRO1|isopen	TRIT1	NO	#N/A
ENSG00000044090	-0.0730359	5.68113	0.83987	0.359434	1	9606	9820	NULL	6	6p21.1	cullin 7	protein-coding	CUL7	cullin 7	O	CUL-7|cullin-7	CUL7	NO	#N/A
ENSG00000044115	0.0597192	8.80931	0.792363	0.373387	1	9606	1495	NULL	5	5q31.2	catenin (cadherin-associated protein), alpha 1, 102kDa	protein-coding	CTNNA1	catenin (cadherin-associated protein), alpha 1, 102kDa	O	alpha E-catenin|alpha-E-catenin|alpha-ca	CTNNA1	NO	#N/A
ENSG00000044446	-0.0565396	4.75036	0.328015	0.566831	1	9606	5256	RP3-499B10.2	X	Xp22.2-p22.1	phosphorylase kinase, alpha 2 (liver)	protein-coding	PHKA2	phosphorylase kinase, alpha 2 (liver)	O	phosphorylase b kinase regulatory subuni	PHKA2	NO	#N/A
ENSG00000044459	0.357777	4.20499	7.32046	0.0068174	1	9606	54875	RP11-163F8.4	9	9p22.2	centlein, centrosomal protein	protein-coding	CNTLN	centlein, centrosomal protein	O	centlein|centrosomal protein	CNTLN	NO	#N/A
ENSG00000044524	0.31774	5.27548	10.4526	0.00122478	1	9606	2042	NULL	3	3p11.2	EPH receptor A3	protein-coding	EPHA3	EPH receptor A3	O	EPH-like kinase 4|TYRO4 protein tyrosine	EPHA3	NO	#N/A
ENSG00000044574	-0.542152	9.38397	78.6623	7.36884e-19	9.91847e-15	9606	3309	NULL	9	9q33.3	heat shock 70kDa protein 5 (glucose-regulated protein, 78kDa)	protein-coding	HSPA5	heat shock 70kDa protein 5 (glucose-regulated protein, 78kDa)	O	78 kDa glucose-regulated protein|endopla	HSPA5	NO	#N/A
ENSG00000046604	0.357729	6.67367	13.9255	0.000190204	1	9606	1829	NULL	18	18q12.1	desmoglein 2	protein-coding	DSG2	desmoglein 2	O	HDGC|cadherin family member 5|desmoglein	DSG2	NO	#N/A
ENSG00000046647	0.00879021	2.8427	0.00440822	0.947064	1	9606	54960	NULL	X	Xp22.2	gem (nuclear organelle) associated protein 8	protein-coding	GEMIN8	gem (nuclear organelle) associated protein 8	O	family with sequence similarity 51, memb	GEMIN8	NO	#N/A
ENSG00000046651	-0.178697	4.99744	4.18946	0.040676	1	9606	8481	NULL	X	Xp22	oral-facial-digital syndrome 1	protein-coding	OFD1	oral-facial-digital syndrome 1	O	oral-facial-digital syndrome 1 protein|p	OFD1	NO	#N/A
ENSG00000046653	0.105164	4.52617	1.17105	0.279185	1	9606	2824	NULL	X	Xp22.2	glycoprotein M6B	protein-coding	GPM6B	glycoprotein M6B	O	neuronal membrane glycoprotein M6-b|prot	GPM6B	NO	#N/A
ENSG00000047056	-0.277982	4.37591	7.3901	0.00655839	1	9606	22884	NULL	10	10p15.3	WD repeat domain 37	protein-coding	WDR37	WD repeat domain 37	O	WD repeat-containing protein 37	WDR37	NO	#N/A
ENSG00000047188	0.389828	5.50381	23.3716	1.33535e-06	0.0155368	9606	64848	NULL	5	5q22.2	YTH domain containing 2	protein-coding	YTHDC2	YTH domain containing 2	O	CsA-associated helicase-like protein|pro	YTHDC2	NO	#N/A
ENSG00000047230	-0.20598	4.01707	3.93585	0.0472674	1	9606	56474	RP11-759L5.3	X	Xp22	CTP synthase 2	protein-coding	CTPS2	CTP synthase 2	O	CTP synthase II|CTP synthetase 2|CTP syn	CTPS2	NO	#N/A
ENSG00000047249	-0.0209646	4.93913	0.0487626	0.825231	1	9606	51606	CGI-11	8	8q11.2	ATPase, H+ transporting, lysosomal 50/57kDa, V1 subunit H	protein-coding	ATP6V1H	ATPase, H+ transporting, lysosomal 50/57kDa, V1 subunit H	O	V-ATPase 50/57 kDa subunits|V-ATPase sub	ATP6V1H	NO	#N/A
ENSG00000047315	-0.122872	7.976	2.65113	0.103476	1	9606	5431	NULL	4	4q12	polymerase (RNA) II (DNA directed) polypeptide B, 140kDa	protein-coding	POLR2B	polymerase (RNA) II (DNA directed) polypeptide B, 140kDa	O	DNA directed RNA polymerase II 140 kDa p	POLR2B	NO	#N/A
ENSG00000047346	0.603654	4.55527	24.1625	8.85408e-07	0.0103708	9606	56204	NULL	15	15q21.2-q21.3	family with sequence similarity 214, member A	protein-coding	FAM214A	family with sequence similarity 214, member A	O	protein FAM214A	FAM214A	NO	#N/A
ENSG00000047365	0.41817	4.77364	18.4196	1.77222e-05	0.195706	9606	116984	NULL	4	4p14	ArfGAP with RhoGAP domain, ankyrin repeat and PH domain 2	protein-coding	ARAP2	ArfGAP with RhoGAP domain, ankyrin repeat and PH domain 2	O	Arf and Rho GAP adapter protein 2|arf-GA	ARAP2	NO	#N/A
ENSG00000047410	0.037349	8.19104	0.146596	0.70181	1	9606	7175	NULL	1	1q25	translocated promoter region, nuclear basket protein	protein-coding	TPR	translocated promoter region, nuclear basket protein	O	NPC-associated intranuclear protein|mega	TPR	NO	#N/A
ENSG00000047578	-0.10608	4.47867	1.30207	0.253835	1	9606	23247	NULL	16	16p12.1	KIAA0556	protein-coding	KIAA0556	KIAA0556	O	uncharacterized protein KIAA0556	KIAA0556	NO	#N/A
ENSG00000047579	0.00045532	3.77761	1.81597e-05	0.9966	1	9606	84062	RP1-147M19.1	6	6p22.3	dystrobrevin binding protein 1	protein-coding	DTNBP1	dystrobrevin binding protein 1	O	BLOC-1 subunit 8|Hermansky-Pudlak syndro	DTNBP1	NO	#N/A
ENSG00000047597	0.260663	3.06324	4.02068	0.0449455	1	9606	7504	NULL	X	Xp21.1	X-linked Kx blood group (McLeod syndrome)	protein-coding	XK	X-linked Kx blood group (McLeod syndrome)	O	Kell blood group precursor (McLeod pheno	XK	NO	#N/A
ENSG00000047621	0.42088	5.10831	17.9256	2.29707e-05	0.251759	9606	57102	NULL	12	12p13.3	chromosome 12 open reading frame 4	protein-coding	C12orf4	chromosome 12 open reading frame 4	O	uncharacterized protein C12orf4	C12orf4	NO	#N/A
ENSG00000047634	0.331386	5.75154	17.3077	3.17899e-05	0.345525	9606	6322	RP3-389A20.1	X	Xp22	sex comb on midleg-like 1 (Drosophila)	protein-coding	SCML1	sex comb on midleg-like 1 (Drosophila)	O	sex comb on midleg-like protein 1	SCML1	NO	#N/A
ENSG00000047644	-0.0727776	6.08428	0.703958	0.401457	1	9606	55841	NULL	X	Xp22.32	WWC family member 3	protein-coding	WWC3	WWC family member 3	O	protein WWC3	WWC3	NO	#N/A
ENSG00000047648	0.588909	2.36574	14.2957	0.000156221	1	9606	395	NULL	X	Xp22.3	Rho GTPase activating protein 6	protein-coding	ARHGAP6	Rho GTPase activating protein 6	O	Rho-type GTPase-activating protein RhoGA	ARHGAP6	NO	#N/A
ENSG00000047849	-0.137364	9.06698	4.22892	0.0397408	1	9606	4134	NULL	3	3p21	microtubule-associated protein 4	protein-coding	MAP4	microtubule-associated protein 4	O	MAP-4	MAP4	NO	#N/A
ENSG00000047932	-0.108857	6.0405	1.55649	0.21218	1	9606	57120	NULL	6	6q21	golgi-associated PDZ and coiled-coil motif containing	protein-coding	GOPC	golgi-associated PDZ and coiled-coil motif containing	O	CFTR-associated ligand|Golgi associated	GOPC	NO	#N/A
ENSG00000048028	0.00531118	5.28762	0.002804	0.95777	1	9606	57646	NULL	11	11q23	ubiquitin specific peptidase 28	protein-coding	USP28	ubiquitin specific peptidase 28	O	deubiquitinating enzyme 28|ubiquitin car	USP28	NO	#N/A
ENSG00000048052	1.97185	5.05549	409.297	5.21334e-91	7.25071e-87	9606	9734	NULL	7	7p21.1	histone deacetylase 9	protein-coding	HDAC9	histone deacetylase 9	O	MEF-2 interacting transcription represso	HDAC9	UP	HDAC9
ENSG00000048140	-0.290174	5.51312	11.2878	0.000780173	1	9606	26262	NULL	5	5q35.3	tetraspanin 17	protein-coding	TSPAN17	tetraspanin 17	O	F-box only protein 23, transmembrane 4 s	TSPAN17	NO	#N/A
ENSG00000048162	-0.417204	6.1325	19.8981	8.16795e-06	0.0917587	9606	51491	CGI-117	5	5q35.2	NOP16 nucleolar protein	protein-coding	NOP16	NOP16 nucleolar protein	O	HBV pre-S2 trans-regulated protein 3|NOP	NOP16	NO	#N/A
ENSG00000048342	0.407041	5.31326	20.5417	5.83473e-06	0.0660374	9606	57545	NULL	4	4p15.32	coiled-coil and C2 domain containing 2A	protein-coding	CC2D2A	coiled-coil and C2 domain containing 2A	O	coiled-coil and C2 domain-containing pro	CC2D2A	NO	#N/A
ENSG00000048392	0.289385	4.3786	5.3909	0.020242	1	9606	50484	NULL	8	8q23.1	ribonucleotide reductase M2 B (TP53 inducible)	protein-coding	RRM2B	ribonucleotide reductase M2 B (TP53 inducible)	O	TP53-inducible ribonucleotide reductase	RRM2B	NO	#N/A
ENSG00000048405	0.34401	5.39696	14.5955	0.000133231	1	9606	168850	PP902	7	7q31.33	zinc finger protein 800	protein-coding	ZNF800	zinc finger protein 800	O	NULL	ZNF800	NO	#N/A
ENSG00000048471	-0.10847	5.05764	1.52226	0.217278	1	9606	92017	NULL	16	16p13.13-p13.12	sorting nexin 29	protein-coding	SNX29	sorting nexin 29	O	RUN domain containing 2A|RUN domain-cont	SNX29	NO	#N/A
ENSG00000048540	0.372466	4.3207	13.3898	0.000252999	1	9606	55885	NULL	12	12p12.3	LIM domain only 3 (rhombotin-like 2)	protein-coding	LMO3	LIM domain only 3 (rhombotin-like 2)	O	LIM domain only protein 3|neuronal-speci	LMO3	NO	#N/A
ENSG00000048544	0.0296111	6.294	0.119168	0.729939	1	9606	55173	MSTP040	6	6p21.1	mitochondrial ribosomal protein S10	protein-coding	MRPS10	mitochondrial ribosomal protein S10	O	28S ribosomal protein S10, mitochondrial	MRPS10	NO	#N/A
ENSG00000048649	0.190646	6.23654	3.65768	0.0558112	1	9606	51773	NULL	11	11q14.1	remodeling and spacing factor 1	protein-coding	RSF1	remodeling and spacing factor 1	O	HBV pX associated protein-8|HBV pX-assoc	RSF1	NO	#N/A
ENSG00000048707	-0.0623847	4.73464	0.290009	0.590215	1	9606	55187	NULL	1	1p36.22	vacuolar protein sorting 13 homolog D (S. cerevisiae)	protein-coding	VPS13D	vacuolar protein sorting 13 homolog D (S. cerevisiae)	O	vacuolar protein sorting 13D|vacuolar pr	VPS13D	NO	#N/A
ENSG00000048740	0.427768	4.81991	18.1604	2.03061e-05	0.223408	9606	10659	RP11-544P1.2	10	10p13	CUGBP, Elav-like family member 2	protein-coding	CELF2	CUGBP, Elav-like family member 2	O	CELF-2|CUG triplet repeat RNA-binding pr	CELF2	NO	#N/A
ENSG00000048828	-0.188721	8.08723	9.28044	0.00231614	1	9606	23196	NULL	9	9q22.31	family with sequence similarity 120A	protein-coding	FAM120A	family with sequence similarity 120A	O	DNA polymerase-transactivated protein 1|	FAM120A	NO	#N/A
ENSG00000048991	0.112885	6.47299	0.742069	0.388999	1	9606	23518	NULL	2	2q21.3	R3H domain containing 1	protein-coding	R3HDM1	R3H domain containing 1	O	R3H domain (binds single-stranded nuclei	R3HDM1	NO	#N/A
ENSG00000049089	0.0958797	2.05042	0.340123	0.559758	1	9606	1298	NULL	1	1p33-p32	collagen, type IX, alpha 2	protein-coding	COL9A2	collagen, type IX, alpha 2	O	alpha 2 type IX collagen|collagen IX, al	COL9A2	NO	#N/A
ENSG00000049130	0.0177689	5.0362	0.0298091	0.862924	1	9606	4254	NULL	12	12q22	KIT ligand	protein-coding	KITLG	KIT ligand	O	c-Kit ligand|familial progressive hyperp	KITLG	NO	#N/A
ENSG00000049167	0.0994622	3.54151	0.648483	0.420655	1	9606	1161	NULL	5	5q12.1	excision repair cross-complementing rodent repair deficiency, complementation group 8	protein-coding	ERCC8	excision repair cross-complementing rodent repair deficiency, complementation group 8	O	Cockayne syndrome WD-repeat protein CSA|	ERCC8	NO	#N/A
ENSG00000049192	-0.0429967	0.0899266	0.0200962	0.887269	1	9606	11174	NULL	5	5q12	ADAM metallopeptidase with thrombospondin type 1 motif, 6	protein-coding	ADAMTS6	ADAM metallopeptidase with thrombospondin type 1 motif, 6	O	A disintegrin and metalloproteinase with	ADAMTS6	NO	#N/A
ENSG00000049239	-0.282303	6.88255	14.8722	0.000115045	1	9606	9563	RP3-510D11.3	1	1p36	hexose-6-phosphate dehydrogenase (glucose 1-dehydrogenase)	protein-coding	H6PD	hexose-6-phosphate dehydrogenase (glucose 1-dehydrogenase)	O	6-phosphogluconolactonase|G6PD, H form|G	H6PD	NO	#N/A
ENSG00000049245	-0.114952	6.42453	1.92199	0.165638	1	9606	9341	NULL	1	1p36.23	vesicle-associated membrane protein 3	protein-coding	VAMP3	vesicle-associated membrane protein 3	O	VAMP-3|cellubrevin|synaptobrevin-3	VAMP3	NO	#N/A
ENSG00000049246	0.365256	4.1542	10.2824	0.00134307	1	9606	8863	RP3-467L1.3	1	1p36.23	period circadian clock 3	protein-coding	PER3	period circadian clock 3	O	cell growth-inhibiting gene 13 protein|c	PER3	NO	#N/A
ENSG00000049247	-0.758739	0.310805	7.10024	0.00770737	1	9606	10911	UNQ525/PRO1068	1	1p36	urotensin 2	protein-coding	UTS2	urotensin 2	O	prepro U-II|urotensin II|urotensin-2	UTS2	NO	#N/A
ENSG00000049323	0.337468	7.00023	20.1836	7.03541e-06	0.079282	9606	4052	NULL	2	2p22-p21	latent transforming growth factor beta binding protein 1	protein-coding	LTBP1	latent transforming growth factor beta binding protein 1	O	LTBP-1|TGF-beta1-BP-1|latent-transformin	LTBP1	NO	#N/A
ENSG00000049449	-0.208292	8.34589	10.1739	0.00142446	1	9606	5954	NULL	11	11p13	reticulocalbin 1, EF-hand calcium binding domain	protein-coding	RCN1	reticulocalbin 1, EF-hand calcium binding domain	O	proliferation-inducing gene 20|reticuloc	RCN1	NO	#N/A
ENSG00000049541	0.135311	6.28999	3.56384	0.0590511	1	9606	5982	NULL	7	7q11.23	replication factor C (activator 1) 2, 40kDa	protein-coding	RFC2	replication factor C (activator 1) 2, 40kDa	O	A1 40 kDa subunit|RF-C 40 kDa subunit|ac	RFC2	NO	#N/A
ENSG00000049618	-0.22344	6.16819	5.63547	0.0176006	1	9606	57492	RP11-419L10.1	6	6q25.1	AT rich interactive domain 1B (SWI1-like)	protein-coding	ARID1B	AT rich interactive domain 1B (SWI1-like)	O	ARID domain-containing protein 1B|AT-ric	ARID1B	NO	#N/A
ENSG00000049656	-1.22673	7.09856	218.232	2.19751e-49	3.04706e-45	9606	81037	NULL	5	5p15.33	CLPTM1-like	protein-coding	CLPTM1L	CLPTM1-like	O	CLPTM1-like protein|CRR9p|cisplatin resi	CLPTM1L	DOWN	CLPTM1L
ENSG00000049759	0.962894	6.23054	100.725	1.05677e-23	1.43911e-19	9606	23327	NULL	18	18q21	neural precursor cell expressed, developmentally down-regulated 4-like, E3 ubiquitin protein ligase	protein-coding	NEDD4L	neural precursor cell expressed, developmentally down-regulated 4-like, E3 ubiquitin protein ligase	O	E3 ubiquitin-protein ligase NEDD4-like|u	NEDD4L	NO	#N/A
ENSG00000049769	0.0919458	4.24574	0.80502	0.369597	1	9606	89801	NULL	X	Xp11.23	protein phosphatase 1, regulatory subunit 3F	protein-coding	PPP1R3F	protein phosphatase 1, regulatory subunit 3F	O	protein phosphatase 1 regulatory subunit	PPP1R3F	NO	#N/A
ENSG00000049860	0.377738	7.16887	33.9927	5.53181e-09	6.87604e-05	9606	3074	HCC7	5	5q13	hexosaminidase B (beta polypeptide)	protein-coding	HEXB	hexosaminidase B (beta polypeptide)	O	HCC-7|N-acetyl-beta-glucosaminidase subu	HEXB	NO	#N/A
ENSG00000049883	0.448058	4.75591	16.4649	4.956e-05	0.531928	9606	79810	NULL	5	5q13.2	pentatricopeptide repeat domain 2	protein-coding	PTCD2	pentatricopeptide repeat domain 2	O	pentatricopeptide repeat-containing prot	PTCD2	NO	#N/A
ENSG00000050130	0.0882789	4.73386	0.84618	0.357635	1	9606	51528	CDA06	14	14q23.1	JNK1/MAPK8-associated membrane protein	protein-coding	JKAMP	JNK1/MAPK8-associated membrane protein	O	JNK-associated membrane protein|JNK1-ass	JKAMP	NO	#N/A
ENSG00000050165	0.197391	6.4603	7.45391	0.00632988	1	9606	27122	UNQ258/PRO295	11	11p15.2	dickkopf WNT signaling pathway inhibitor 3	protein-coding	DKK3	dickkopf WNT signaling pathway inhibitor 3	O	RIG-like 5-6|RIG-like 7-1|dickkopf 3 hom	DKK3	NO	#N/A
ENSG00000050327	-0.358098	3.99277	10.5815	0.00114227	1	9606	7984	NULL	7	7q35	Rho guanine nucleotide exchange factor (GEF) 5	protein-coding	ARHGEF5	Rho guanine nucleotide exchange factor (GEF) 5	O	ephexin-3|guanine nucleotide regulatory	ARHGEF5	NO	#N/A
ENSG00000050344	0.355894	5.40245	16.6789	4.42717e-05	0.476673	9606	9603	NULL	7	7p15.2	nuclear factor (erythroid-derived 2)-like 3	protein-coding	NFE2L3	nuclear factor (erythroid-derived 2)-like 3	O	NF-E2-related factor 3|NFE2-related fact	NFE2L3	NO	#N/A
ENSG00000050393	0.307508	6.26508	16.6643	4.46137e-05	0.480266	9606	63933	NULL	6	6p23	mitochondrial calcium uniporter regulator 1	protein-coding	MCUR1	mitochondrial calcium uniporter regulator 1	O	coiled-coil domain containing 90A|coiled	MCUR1	NO	#N/A
ENSG00000050405	0.317737	5.89655	11.3349	0.000760643	1	9606	51474	PP624	12	12q13	LIM domain and actin binding 1	protein-coding	LIMA1	LIM domain and actin binding 1	O	1110021C24Rik|LIM domain and actin-bindi	LIMA1	NO	#N/A
ENSG00000050426	0.0723159	5.06529	0.569402	0.450497	1	9606	25875	NULL	12	12q13.12	LETM1 domain containing 1	protein-coding	LETMD1	LETM1 domain containing 1	O	LETM1 domain-containing protein 1|cervic	LETMD1	NO	#N/A
ENSG00000050438	0.255094	3.82517	4.02689	0.0447803	1	9606	9498	NULL	12	12q13.13	solute carrier family 4, sodium bicarbonate cotransporter, member 8	protein-coding	SLC4A8	solute carrier family 4, sodium bicarbonate cotransporter, member 8	O	electroneutral Na(+)-driven Cl-HCO3 exch	SLC4A8	NO	#N/A
ENSG00000050748	0.0706605	5.58091	0.735757	0.391023	1	9606	5601	NULL	5	5q35	mitogen-activated protein kinase 9	protein-coding	MAPK9	mitogen-activated protein kinase 9	O	Jun kinase|MAP kinase 9|MAPK 9|c-Jun N-t	MAPK9	NO	#N/A
ENSG00000050820	-0.778104	7.21015	92.0622	8.39963e-22	1.13975e-17	9606	9564	hCG_1980470	16	16q23.1	breast cancer anti-estrogen resistance 1	protein-coding	BCAR1	breast cancer anti-estrogen resistance 1	O	Cas scaffolding protein family member 1|	BCAR1	NO	#N/A
ENSG00000051009	-0.254995	5.02874	8.95723	0.00276374	1	9606	84067	NULL	11	11p15.4	family with sequence similarity 160, member A2	protein-coding	FAM160A2	family with sequence similarity 160, member A2	O	FHIP|FTS and Hook-interacting protein	FAM160A2	NO	#N/A
ENSG00000051108	0.325153	4.24701	11.48	0.000703476	1	9606	9709	NULL	16	16q13	homocysteine-inducible, endoplasmic reticulum stress-inducible, ubiquitin-like domain member 1	protein-coding	HERPUD1	homocysteine-inducible, endoplasmic reticulum stress-inducible, ubiquitin-like domain member 1	O	MMS-inducible|homocysteine-inducible end	HERPUD1	NO	#N/A
ENSG00000051128	-0.337521	5.67686	9.59942	0.00194639	1	9606	9454	NULL	19	19p13.11	homer homolog 3 (Drosophila)	protein-coding	HOMER3	homer homolog 3 (Drosophila)	O	Homer, neuronal immediate early gene, 3|	HOMER3	NO	#N/A
ENSG00000051180	-0.341412	4.00883	10.0038	0.0015622	1	9606	5888	NULL	15	15q15.1	RAD51 homolog (S. cerevisiae)	protein-coding	RAD51	RAD51 homolog (S. cerevisiae)	O	BRCA1/BRCA2-containing complex, subunit	RAD51	NO	#N/A
ENSG00000051341	-0.0562015	5.534	0.321101	0.570947	1	9606	10721	NULL	3	3q13.33	polymerase (DNA directed), theta	protein-coding	POLQ	polymerase (DNA directed), theta	O	DNA polymerase eta|DNA polymerase theta	POLQ	NO	#N/A
ENSG00000051382	-0.244036	5.48723	8.27818	0.00401244	1	9606	5291	NULL	3	3q22.3	phosphatidylinositol-4,5-bisphosphate 3-kinase, catalytic subunit beta	protein-coding	PIK3CB	phosphatidylinositol-4,5-bisphosphate 3-kinase, catalytic subunit beta	O	PI3-kinase p110 subunit beta|PI3-kinase	PIK3CB	NO	#N/A
ENSG00000051596	-0.181455	5.99672	5.19455	0.0226578	1	9606	84321	NULL	5	5q35.2	THO complex 3	protein-coding	THOC3	THO complex 3	O	TEX1 homolog|THO complex subunit 3	THOC3	NO	#N/A
ENSG00000051620	0.0811365	4.38413	0.499911	0.479539	1	9606	23593	RP3-422G23.1	6	6q24	heme binding protein 2	protein-coding	HEBP2	heme binding protein 2	O	heme-binding protein 2|placental protein	HEBP2	NO	#N/A
ENSG00000051825	0.0918598	5.71038	0.965732	0.325747	1	9606	10198	NULL	12	12q24.31	M-phase phosphoprotein 9	protein-coding	MPHOSPH9	M-phase phosphoprotein 9	O	NULL	MPHOSPH9	NO	#N/A
ENSG00000052126	0.119976	4.28774	0.924168	0.336383	1	9606	54477	NULL	12	12p12	pleckstrin homology domain containing, family A member 5	protein-coding	PLEKHA5	pleckstrin homology domain containing, family A member 5	O	PH domain-containing family A member 5|p	PLEKHA5	NO	#N/A
ENSG00000052723	0.373225	6.34954	12.6134	0.000382997	1	9606	80143	RP5-1000E10.4	1	1p13.2	suppressor of IKBKE 1	protein-coding	SIKE1	suppressor of IKBKE 1	O	suppressor of IKK epsilon|suppressor of	SIKE1	NO	#N/A
ENSG00000052749	-0.153025	7.38289	3.08707	0.0789167	1	9606	23223	RP11-452K12.13-007	10	10q24.1	ribosomal RNA processing 12 homolog (S. cerevisiae)	protein-coding	RRP12	ribosomal RNA processing 12 homolog (S. cerevisiae)	O	RRP12-like protein	RRP12	NO	#N/A
ENSG00000052795	0.207885	5.19327	4.93213	0.0263618	1	9606	57600	NULL	4	4q32.1	folliculin interacting protein 2	protein-coding	FNIP2	folliculin interacting protein 2	O	FNIP1-like protein|O6-methylguanine-indu	FNIP2	NO	#N/A
ENSG00000052802	-0.30939	6.45637	16.5832	4.65619e-05	0.500587	9606	6307	NULL	4	4q32-q34	methylsterol monooxygenase 1	protein-coding	MSMO1	methylsterol monooxygenase 1	O	C-4 methyl sterol|C-4 methylsterol oxida	MSMO1	NO	#N/A
ENSG00000052841	0.359548	6.37367	22.3539	2.26757e-06	0.0261565	9606	55761	NULL	11	11p11.2	tetratricopeptide repeat domain 17	protein-coding	TTC17	tetratricopeptide repeat domain 17	O	TPR repeat protein 17|tetratricopeptide	TTC17	NO	#N/A
ENSG00000053254	0.318996	4.77719	4.14086	0.0418598	1	9606	1112	NULL	14	14q31.3	forkhead box N3	protein-coding	FOXN3	forkhead box N3	O	checkpoint suppressor 1|forkhead box pro	FOXN3	NO	#N/A
ENSG00000053371	-0.0632739	5.27019	0.44704	0.503744	1	9606	8574	NULL	1	1p36.13	aldo-keto reductase family 7, member A2 (aflatoxin aldehyde reductase)	protein-coding	AKR7A2	aldo-keto reductase family 7, member A2 (aflatoxin aldehyde reductase)	O	AFB1 aldehyde reductase 1|AFB1-AR 1|SSA	AKR7A2	NO	#N/A
ENSG00000053372	-0.509212	6.78179	35.5255	2.51729e-09	3.14737e-05	9606	51154	NULL	1	1p36.13	mRNA turnover 4 homolog (S. cerevisiae)	protein-coding	MRTO4	mRNA turnover 4 homolog (S. cerevisiae)	O	60S acidic ribosomal protein PO|MRT4, mR	MRTO4	NO	#N/A
ENSG00000053501	0.36436	4.22725	13.6532	0.000219867	1	9606	55850	MDS032	19	19p13.11	unconventional SNARE in the ER 1 homolog (S. cerevisiae)	protein-coding	USE1	unconventional SNARE in the ER 1 homolog (S. cerevisiae)	O	Q-SNARE|SNARE-like tail-anchored protein	USE1	NO	#N/A
ENSG00000053524	0.075726	0.520644	0.0828652	0.773451	1	9606	23101	NULL	3	3q27.1	MCF.2 cell line derived transforming sequence-like 2	protein-coding	MCF2L2	MCF.2 cell line derived transforming sequence-like 2	O	MCF2-transforming sequence-like protein	MCF2L2	NO	#N/A
ENSG00000053702	0.332981	0.829331	1.89473	0.168669	1	9606	83714	NULL	12	12p13.33	nuclear receptor interacting protein 2	protein-coding	NRIP2	nuclear receptor interacting protein 2	O	nuclear receptor-interacting protein 2	NRIP2	NO	#N/A
ENSG00000053747	-0.402773	4.69803	14.8162	0.000118513	1	9606	3909	NULL	18	18q11.2	laminin, alpha 3	protein-coding	LAMA3	laminin, alpha 3	O	BM600 150kD subunit|epiligrin 170 kda su	LAMA3	NO	#N/A
ENSG00000053770	0.0430354	4.51444	0.170845	0.679362	1	9606	55745	NULL	14	14q22.3	adaptor-related protein complex 5, mu 1 subunit	protein-coding	AP5M1	adaptor-related protein complex 5, mu 1 subunit	O	AP-5 complex subunit mu|AP-5 complex sub	AP5M1	NO	#N/A
ENSG00000053900	0.112981	5.09875	1.27056	0.259662	1	9606	29945	NULL	4	4p15.2	anaphase promoting complex subunit 4	protein-coding	ANAPC4	anaphase promoting complex subunit 4	O	anaphase-promoting complex subunit 4|cyc	ANAPC4	NO	#N/A
ENSG00000054116	-0.120203	5.88849	1.71817	0.189928	1	9606	27095	CDABP0066	1	1p34.3	trafficking protein particle complex 3	protein-coding	TRAPPC3	trafficking protein particle complex 3	O	trafficking protein particle complex sub	TRAPPC3	NO	#N/A
ENSG00000054118	-0.773167	7.46372	127.805	1.23855e-29	1.70053e-25	9606	9967	NULL	1	1p34.3	thyroid hormone receptor associated protein 3	protein-coding	THRAP3	thyroid hormone receptor associated protein 3	O	thyroid hormone receptor-associated prot	THRAP3	NO	#N/A
ENSG00000054148	-0.780119	4.48391	33.5042	7.11105e-09	8.82197e-05	9606	29085	RP11-216L13.10-005	9	9q34.3	phosphohistidine phosphatase 1	protein-coding	PHPT1	phosphohistidine phosphatase 1	O	14 kDa phosphohistidine phosphatase|1700	PHPT1	NO	#N/A
ENSG00000054267	0.117916	6.07071	1.31494	0.251502	1	9606	51742	RP11-382D8.2	1	1q42.1-q43	AT rich interactive domain 4B (RBP1-like)	protein-coding	ARID4B	AT rich interactive domain 4B (RBP1-like)	O	180 kDa Sin3-associated polypeptide|ARID	ARID4B	NO	#N/A
ENSG00000054277	-0.625415	4.69534	34.0035	5.50137e-09	6.8393e-05	9606	23596	NULL	1	1q43	opsin 3	protein-coding	OPN3	opsin 3	O	encephalopsin|opsin 3 (encephalopsin, pa	OPN3	NO	#N/A
ENSG00000054282	0.210299	4.66251	4.42263	0.0354654	1	9606	10806	HSPC085	1	1q43	serologically defined colon cancer antigen 8	protein-coding	SDCCAG8	serologically defined colon cancer antigen 8	O	antigen NY-CO-8|centrosomal colon cancer	SDCCAG8	NO	#N/A
ENSG00000054356	0.504559	5.88129	33.5916	6.79861e-09	8.4364e-05	9606	5798	NULL	2	2q35-q36.1	protein tyrosine phosphatase, receptor type, N	protein-coding	PTPRN	protein tyrosine phosphatase, receptor type, N	O	ICA 512|PTP IA-2|islet cell antigen 2|is	PTPRN	NO	#N/A
ENSG00000054392	0.327204	3.0188	6.10512	0.0134791	1	9606	55733	NULL	1	1q32	hedgehog acyltransferase	protein-coding	HHAT	hedgehog acyltransferase	O	melanoma antigen recognized by T cells 2	HHAT	NO	#N/A
ENSG00000054523	-0.011988	6.52917	0.0207752	0.885393	1	9606	23095	RP4-736L20.1	1	1p36.2	kinesin family member 1B	protein-coding	KIF1B	kinesin family member 1B	O	kinesin superfamily protein KIF1B|kinesi	KIF1B	NO	#N/A
ENSG00000054598	0.6373	4.05834	38.2473	6.23247e-10	7.86039e-06	9606	2296	NULL	6	6p25	forkhead box C1	protein-coding	FOXC1	forkhead box C1	O	forkhead box protein C1|forkhead, drosop	FOXC1	NO	#N/A
ENSG00000054611	-1.1744	3.64589	101.79	6.17401e-24	8.41085e-20	9606	25771	LL22NC03-65D1.1	22	22q13.3	TBC1 domain family, member 22A	protein-coding	TBC1D22A	TBC1 domain family, member 22A	O	TBC1 domain family member 22A|putative G	TBC1D22A	DOWN	TBC1D22A
ENSG00000054654	-0.0910712	3.60693	0.36843	0.543861	1	9606	23224	NULL	14	14q23.2	spectrin repeat containing, nuclear envelope 2	protein-coding	SYNE2	spectrin repeat containing, nuclear envelope 2	O	nesprin 2|nesprin-2|nuclear envelope spe	SYNE2	NO	#N/A
ENSG00000054690	0.0782254	1.74327	0.167123	0.682682	1	9606	57475	NULL	14	14q24.1	pleckstrin homology domain containing, family H (with MyTH4 domain) member 1	protein-coding	PLEKHH1	pleckstrin homology domain containing, family H (with MyTH4 domain) member 1	O	PH domain-containing family H member 1|p	PLEKHH1	NO	#N/A
ENSG00000054793	0.0132888	4.35952	0.013746	0.906667	1	9606	10079	NULL	20	20q13.2	ATPase, class II, type 9A	protein-coding	ATP9A	ATPase, class II, type 9A	O	ATPase type IV, phospholipid-transportin	ATP9A	NO	#N/A
ENSG00000054965	-0.33485	6.1804	20.5212	5.8974e-06	0.0667173	9606	23201	NULL	11	11q13.4	family with sequence similarity 168, member A	protein-coding	FAM168A	family with sequence similarity 168, member A	O	protein FAM168A|tongue cancer chemothera	FAM168A	NO	#N/A
ENSG00000054967	-0.229291	4.9797	5.8683	0.0154159	1	9606	84957	NULL	11	11q13.4	RELT tumor necrosis factor receptor	protein-coding	RELT	RELT tumor necrosis factor receptor	O	receptor expressed in lymphoid tissues|t	RELT	NO	#N/A
ENSG00000054983	0.115033	2.60591	0.641901	0.423023	1	9606	2581	NULL	14	14q31	galactosylceramidase	protein-coding	GALC	galactosylceramidase	O	GALCERase|galactocerebrosidase|galactoce	GALC	NO	#N/A
ENSG00000055044	-0.493893	7.53927	41.766	1.02876e-10	1.31301e-06	9606	51602	HSPC120	2	2q33.1	NOP58 ribonucleoprotein	protein-coding	NOP58	NOP58 ribonucleoprotein	O	NOP58 ribonucleoprotein homolog|nucleola	NOP58	NO	#N/A
ENSG00000055070	-0.0986239	7.90348	1.55423	0.212512	1	9606	26099	NULL	1	1p36.13	SUZ RNA binding domain containing 1	protein-coding	SZRD1	SUZ RNA binding domain containing 1	O	SUZ domain-containing protein 1|UPF0485	SZRD1	NO	#N/A
ENSG00000055130	-0.270077	7.0849	12.0197	0.00052642	1	9606	8454	NULL	7	7q36.1	cullin 1	protein-coding	CUL1	cullin 1	O	CUL-1|cullin-1	CUL1	NO	#N/A
ENSG00000055147	0.425758	4.51696	12.9299	0.00032338	1	9606	10827	NULL	5	5q31-q33	family with sequence similarity 114, member A2	protein-coding	FAM114A2	family with sequence similarity 114, member A2	O	protein FAM114A2	FAM114A2	NO	#N/A
ENSG00000055163	0.740243	4.71085	50.4344	1.23217e-12	1.60515e-08	9606	26999	NULL	5	5q33.3	cytoplasmic FMR1 interacting protein 2	protein-coding	CYFIP2	cytoplasmic FMR1 interacting protein 2	O	cytoplasmic FMR1-interacting protein 2|p	CYFIP2	NO	#N/A
ENSG00000055208	0.0875354	6.55272	0.950694	0.329543	1	9606	23118	NULL	6	6q25.1	TGF-beta activated kinase 1/MAP3K7 binding protein 2	protein-coding	TAB2	TGF-beta activated kinase 1/MAP3K7 binding protein 2	O	TAB-2|TAK1-binding protein 2|TGF-beta-ac	TAB2	NO	#N/A
ENSG00000055211	-0.0184986	4.45599	0.038402	0.844638	1	9606	116254	RP1-12G14.8	6	6q25.1	glycoprotein integral membrane 1	protein-coding	GINM1	glycoprotein integral membrane 1	O	glycoprotein integral membrane protein 1	GINM1	NO	#N/A
ENSG00000055332	0.0468136	6.75322	0.304051	0.581354	1	9606	5610	NULL	2	2p22-p21	eukaryotic translation initiation factor 2-alpha kinase 2	protein-coding	EIF2AK2	eukaryotic translation initiation factor 2-alpha kinase 2	O	P1/eIF-2A protein kinase|double stranded	EIF2AK2	NO	#N/A
ENSG00000055483	-0.0798258	7.18241	1.51028	0.219097	1	9606	57602	NULL	17	17q25.3	ubiquitin specific peptidase 36	protein-coding	USP36	ubiquitin specific peptidase 36	O	deubiquitinating enzyme 1|deubiquitinati	USP36	NO	#N/A
ENSG00000055609	-0.0640679	5.71816	0.202777	0.652489	1	9606	58508	NULL	7	7q36.1	lysine (K)-specific methyltransferase 2C	protein-coding	KMT2C	lysine (K)-specific methyltransferase 2C	O	ALR-like protein|histone-lysine N-methyl	KMT2C	NO	#N/A
ENSG00000055917	0.12249	7.17456	2.7065	0.0999402	1	9606	23369	NULL	2	2p22-p21	pumilio homolog 2 (Drosophila)	protein-coding	PUM2	pumilio homolog 2 (Drosophila)	O	pumilio homolog 2|pumilio-2	PUM2	NO	#N/A
ENSG00000055950	-0.10666	5.78414	1.08963	0.296552	1	9606	84545	RP11-108L7.13-001	10	10q24.31	mitochondrial ribosomal protein L43	protein-coding	MRPL43	mitochondrial ribosomal protein L43	O	39S ribosomal protein L43, mitochondrial	MRPL43	NO	#N/A
ENSG00000056050	0.180781	5.36139	4.50381	0.0338194	1	9606	54969	NULL	4	4q33	chromosome 4 open reading frame 27	protein-coding	C4orf27	chromosome 4 open reading frame 27	O	UPF0609 protein C4orf27	C4orf27	NO	#N/A
ENSG00000056097	-0.260972	7.21926	10.4749	0.00121008	1	9606	51663	NULL	5	5p13.3	zinc finger RNA binding protein	protein-coding	ZFR	zinc finger RNA binding protein	O	M-phase phosphoprotein homolog|hZFR|zinc	ZFR	NO	#N/A
ENSG00000056277	0.36866	4.77439	11.4022	0.00073359	1	9606	55609	RP3-438D16.3	X	Xq26.1	zinc finger protein 280C	protein-coding	ZNF280C	zinc finger protein 280C	O	suppressor of hairy wing homolog 3|zinc	ZNF280C	NO	#N/A
ENSG00000056291	-0.499417	1.12255	5.25732	0.0218546	1	9606	10886	NULL	4	4q21	neuropeptide FF receptor 2	protein-coding	NPFFR2	neuropeptide FF receptor 2	O	G protein-coupled receptor 74|G-protein	NPFFR2	NO	#N/A
ENSG00000056558	0.367263	4.4738	14.9862	0.000108298	1	9606	7185	NULL	9	9q33-q34	TNF receptor-associated factor 1	protein-coding	TRAF1	TNF receptor-associated factor 1	O	Epstein-Bar virus-induced protein 6	TRAF1	NO	#N/A
ENSG00000056586	0.468479	6.78294	18.4967	1.70198e-05	0.18812	9606	54542	RP11-163B6.3	9	9q34	ring finger and CCCH-type domains 2	protein-coding	RC3H2	ring finger and CCCH-type domains 2	O	RING finger and CCCH-type zinc finger do	RC3H2	NO	#N/A
ENSG00000056972	-0.0478517	4.42506	0.266396	0.60576	1	9606	10758	RP3-487J7.3	6	6q21	TRAF3 interacting protein 2	protein-coding	TRAF3IP2	TRAF3 interacting protein 2	O	NFkB-activating protein ACT1|adapter pro	TRAF3IP2	NO	#N/A
ENSG00000056998	-0.161598	4.347	2.70456	0.100062	1	9606	8908	NULL	X	Xp22.3	glycogenin 2	protein-coding	GYG2	glycogenin 2	O	glycogenin glucosyltransferase|glycogeni	GYG2	NO	#N/A
ENSG00000057019	-0.0752359	9.14231	0.559051	0.454643	1	9606	131566	NULL	3	3q12.1|3	discoidin, CUB and LCCL domain containing 2	protein-coding	DCBLD2	discoidin, CUB and LCCL domain containing 2	O	1700055P21Rik|CUB, LCCL and coagulation	DCBLD2	NO	#N/A
ENSG00000057252	0.0918889	8.00496	1.48677	0.222718	1	9606	6646	RP11-215I23.1	1	1q25	sterol O-acyltransferase 1	protein-coding	SOAT1	sterol O-acyltransferase 1	O	acyl-coenzyme A:cholesterol acyltransfer	SOAT1	NO	#N/A
ENSG00000057608	-0.2045	7.89549	8.89177	0.00286458	1	9606	2665	RP11-318E3.2	10	10p15	GDP dissociation inhibitor 2	protein-coding	GDI2	GDP dissociation inhibitor 2	O	GDI-2|guanosine diphosphate dissociation	GDI2	NO	#N/A
ENSG00000057663	-0.102358	5.46816	1.55882	0.211839	1	9606	9474	NULL	6	6q21	autophagy related 5	protein-coding	ATG5	autophagy related 5	O	ATG5 autophagy related 5 homolog|apoptos	ATG5	NO	#N/A
ENSG00000057704	-1.20924	2.75189	65.8136	4.95657e-16	6.59621e-12	9606	57458	NULL	12	12q22	transmembrane and coiled-coil domain family 3	protein-coding	TMCC3	transmembrane and coiled-coil domain family 3	O	transmembrane and coiled-coil domains 3|	TMCC3	DOWN	TMCC3
ENSG00000057757	-0.348778	5.75467	15.6177	7.75273e-05	0.821635	9606	57095	AD039	1	1p36.11	PITH (C-terminal proteasome-interacting domain of thioredoxin-like) domain containing 1	protein-coding	PITHD1	PITH (C-terminal proteasome-interacting domain of thioredoxin-like) domain containing 1	O	HT014|PITH domain-containing protein 1|T	PITHD1	NO	#N/A
ENSG00000057935	0.307861	4.92447	12.0119	0.000528607	1	9606	57504	hCG_1783907	2	2p21	metastasis associated 1 family, member 3	protein-coding	MTA3	metastasis associated 1 family, member 3	O	metastasis associated family, member 3|m	MTA3	NO	#N/A
ENSG00000058056	-0.0692407	6.32303	0.507615	0.476173	1	9606	8975	NULL	3	3q26.2-q26.3	ubiquitin specific peptidase 13 (isopeptidase T-3)	protein-coding	USP13	ubiquitin specific peptidase 13 (isopeptidase T-3)	O	deubiquitinating enzyme 13|isopeptidase	USP13	NO	#N/A
ENSG00000058063	0.202204	7.07706	4.06961	0.0436613	1	9606	23200	NULL	3	3q27	ATPase, class VI, type 11B	protein-coding	ATP11B	ATPase, class VI, type 11B	O	ATPase IR|probable phospholipid-transpor	ATP11B	NO	#N/A
ENSG00000058085	-0.984508	1.9338	32.3262	1.30347e-08	0.000160718	9606	3918	NULL	1	1q25-q31	laminin, gamma 2	protein-coding	LAMC2	laminin, gamma 2	O	BM600-100kDa|CSF 140 kDa subunit|cell-sc	LAMC2	NO	#N/A
ENSG00000058091	-0.265449	5.30032	5.72934	0.0166837	1	9606	5218	NULL	7	7q21-q22	cyclin-dependent kinase 14	protein-coding	CDK14	cyclin-dependent kinase 14	O	PFTAIRE protein kinase 1|cell division p	CDK14	NO	#N/A
ENSG00000058262	-0.204462	9.2944	11.8001	0.000592276	1	9606	29927	NULL	3	3q21.3	Sec61 alpha 1 subunit (S. cerevisiae)	protein-coding	SEC61A1	Sec61 alpha 1 subunit (S. cerevisiae)	O	Sec61 alpha-1|protein transport protein	SEC61A1	NO	#N/A
ENSG00000058272	-0.103514	6.68261	1.14635	0.284314	1	9606	4659	NULL	12	12q15-q21	protein phosphatase 1, regulatory subunit 12A	protein-coding	PPP1R12A	protein phosphatase 1, regulatory subunit 12A	O	myosin binding subunit|myosin phosphatas	PPP1R12A	NO	#N/A
ENSG00000058453	0.18802	4.71958	1.05974	0.303274	1	9606	9696	NULL	1	1p36.13	ciliary rootlet coiled-coil, rootletin	protein-coding	CROCC	ciliary rootlet coiled-coil, rootletin	O	Tax1-binding protein 2|ciliary rootlet c	CROCC	NO	#N/A
ENSG00000058600	0.230767	6.82943	8.97912	0.00273082	1	9606	55718	NULL	16	16p12.2	polymerase (RNA) III (DNA directed) polypeptide E (80kD)	protein-coding	POLR3E	polymerase (RNA) III (DNA directed) polypeptide E (80kD)	O	DNA-directed RNA polymerase III 80 kDa p	POLR3E	NO	#N/A
ENSG00000058668	-0.514576	7.88495	25.3538	4.77205e-07	0.00563484	9606	493	NULL	1	1q32.1	ATPase, Ca++ transporting, plasma membrane 4	protein-coding	ATP2B4	ATPase, Ca++ transporting, plasma membrane 4	O	matrix-remodeling-associated protein 1|p	ATP2B4	NO	#N/A
ENSG00000058673	-0.0629553	7.80209	0.699826	0.402842	1	9606	9877	NULL	1	1q32.1	zinc finger CCCH-type containing 11A	protein-coding	ZC3H11A	zinc finger CCCH-type containing 11A	O	zinc finger CCCH domain-containing prote	ZC3H11A	NO	#N/A
ENSG00000058729	-0.0524697	4.77124	0.20365	0.651791	1	9606	55781	NULL	5	5q15	RIO kinase 2	protein-coding	RIOK2	RIO kinase 2	O	serine/threonine-protein kinase RIO2	RIOK2	NO	#N/A
ENSG00000058799	0.443515	3.20213	11.8517	0.000576088	1	9606	54432	NULL	1	1p33-p32.1	Yip1 domain family, member 1	protein-coding	YIPF1	Yip1 domain family, member 1	O	YIP1 family member 1|protein YIPF1	YIPF1	NO	#N/A
ENSG00000058804	-0.0427816	6.29958	0.22295	0.636801	1	#N/A	#N/A	#N/A	#N/A	#N/A	#N/A	#N/A	#N/A	#N/A	#N/A	#N/A	NDC1	NO	#N/A
ENSG00000058866	-0.123915	4.20008	1.52345	0.217099	1	9606	1608	NULL	3	3q27.2-q27.3	diacylglycerol kinase, gamma 90kDa	protein-coding	DGKG	diacylglycerol kinase, gamma 90kDa	O	DAG kinase gamma|diacylglycerol kinase g	DGKG	NO	#N/A
ENSG00000059122	-0.0328805	5.2598	0.107136	0.743429	1	9606	84256	NULL	16	16p13.3	FLYWCH-type zinc finger 1	protein-coding	FLYWCH1	FLYWCH-type zinc finger 1	O	FLYWCH-type zinc finger-containing prote	FLYWCH1	NO	#N/A
ENSG00000059145	-0.671352	5.36895	44.8213	2.15857e-11	2.77657e-07	9606	64718	LA16c-316G12.1	16	16p13.3	unkempt homolog (Drosophila)-like	protein-coding	UNKL	unkempt homolog (Drosophila)-like	O	RING finger protein unkempt-like|putativ	UNKL	NO	#N/A
ENSG00000059377	0.0874808	1.71552	0.233233	0.629137	1	9606	6916	NULL	7	7q34-q35	thromboxane A synthase 1 (platelet)	protein-coding	TBXAS1	thromboxane A synthase 1 (platelet)	O	TXA synthase|cytochrome P450 5A1|cytochr	TBXAS1	NO	#N/A
ENSG00000059378	-0.0763632	3.41686	0.400454	0.526855	1	9606	64761	NULL	7	7q34	poly (ADP-ribose) polymerase family, member 12	protein-coding	PARP12	poly (ADP-ribose) polymerase family, member 12	O	ADP-ribosyltransferase diphtheria toxin-	PARP12	NO	#N/A
ENSG00000059573	-0.172339	6.70201	6.67391	0.00978342	1	9606	5832	NULL	10	10q24.3	aldehyde dehydrogenase 18 family, member A1	protein-coding	ALDH18A1	aldehyde dehydrogenase 18 family, member A1	O	aldehyde dehydrogenase family 18 member	ALDH18A1	NO	#N/A
ENSG00000059588	0.100635	6.14051	1.33201	0.248448	1	9606	6894	RP5-827C21.5	1	1q42.3	TAR (HIV-1) RNA binding protein 1	protein-coding	TARBP1	TAR (HIV-1) RNA binding protein 1	O	TAR (HIV) RNA binding protein 1|TAR (HIV	TARBP1	NO	#N/A
ENSG00000059691	0.143055	5.4468	2.03214	0.154003	1	#N/A	#N/A	#N/A	#N/A	#N/A	#N/A	#N/A	#N/A	#N/A	#N/A	#N/A	GATB	NO	#N/A
ENSG00000059728	0.527607	4.35901	28.8218	7.93542e-08	0.000960344	9606	4084	NULL	2	2p13-p12	MAX dimerization protein 1	protein-coding	MXD1	MAX dimerization protein 1	O	MAX-binding protein|antagonizer of myc t	MXD1	NO	#N/A
ENSG00000059758	0.0787674	5.38831	0.920393	0.337372	1	9606	5128	NULL	12	12q23.1	cyclin-dependent kinase 17	protein-coding	CDK17	cyclin-dependent kinase 17	O	PCTAIRE-motif protein kinase 2|cell divi	CDK17	NO	#N/A
ENSG00000059769	0.282354	3.77363	5.44702	0.0196018	1	9606	548645	NULL	9	9q31.3	DnaJ (Hsp40) homolog, subfamily C , member 25	protein-coding	DNAJC25	DnaJ (Hsp40) homolog, subfamily C , member 25	O	DnaJ-like protein|dnaJ homolog subfamily	DNAJC25	NO	#N/A
ENSG00000059804	0.418085	6.68649	28.7829	8.09614e-08	0.000979147	9606	6515	NULL	12	12p13.3	solute carrier family 2 (facilitated glucose transporter), member 3	protein-coding	SLC2A3	solute carrier family 2 (facilitated glucose transporter), member 3	O	GLUT-3|glucose transporter type 3, brain	SLC2A3	NO	#N/A
ENSG00000060069	-0.459721	4.71489	19.7033	9.04459e-06	0.101408	9606	9150	NULL	18	18q23	CTD (carboxy-terminal domain, RNA polymerase II, polypeptide A) phosphatase, subunit 1	protein-coding	CTDP1	CTD (carboxy-terminal domain, RNA polymerase II, polypeptide A) phosphatase, subunit 1	O	CTD of POLR2A, phosphatase of, subunit 1	CTDP1	NO	#N/A
ENSG00000060138	-0.191105	7.83669	8.16992	0.00425908	1	9606	8531	NULL	12	12p13.1	Y box binding protein 3	protein-coding	YBX3	Y box binding protein 3	O	DNA-binding protein A|ZO-1-associated nu	YBX3	NO	#N/A
ENSG00000060140	-0.0397864	2.37131	0.0644823	0.799547	1	9606	55359	NULL	12	12p13.2	serine/threonine/tyrosine kinase 1	protein-coding	STYK1	serine/threonine/tyrosine kinase 1	O	novel oncogene with kinase domain|protei	STYK1	NO	#N/A
ENSG00000060237	-0.29515	8.86793	7.98872	0.00470697	1	9606	65125	NULL	12	12p13.3	WNK lysine deficient protein kinase 1	protein-coding	WNK1	WNK lysine deficient protein kinase 1	O	WNK lysine deficient protein kinase 1 is	WNK1	NO	#N/A
ENSG00000060339	-0.0217438	6.9855	0.0701409	0.791132	1	9606	55749	NULL	10	10q21.3	cell division cycle and apoptosis regulator 1	protein-coding	CCAR1	cell division cycle and apoptosis regulator 1	O	cell cycle and apoptosis regulatory prot	CCAR1	NO	#N/A
ENSG00000060491	-0.713117	5.5432	28.2139	1.08624e-07	0.00130924	9606	11054	RP5-885L7.2	20	20q13.3	opioid growth factor receptor	protein-coding	OGFR	opioid growth factor receptor	O	7-60 protein|protein 7-60|zeta-type opio	OGFR	NO	#N/A
ENSG00000060642	0.125544	3.89661	1.2791	0.258066	1	9606	55650	RP1-50O24.2	1	1p36.11	phosphatidylinositol glycan anchor biosynthesis, class V	protein-coding	PIGV	phosphatidylinositol glycan anchor biosynthesis, class V	O	GPI mannosyltransferase 2|GPI mannosyltr	PIGV	NO	#N/A
ENSG00000060688	-0.247253	5.68167	6.31193	0.0119928	1	9606	9410	NULL	1	1p35.2	small nuclear ribonucleoprotein 40kDa (U5)	protein-coding	SNRNP40	small nuclear ribonucleoprotein 40kDa (U5)	O	38 kDa-splicing factor|Prp8-binding prot	SNRNP40	NO	#N/A
ENSG00000060718	0.545004	3.94763	25.5244	4.36824e-07	0.00516719	9606	1301	NULL	1	1p21	collagen, type XI, alpha 1	protein-coding	COL11A1	collagen, type XI, alpha 1	O	collagen XI, alpha-1 polypeptide|collage	COL11A1	NO	#N/A
ENSG00000060749	-0.0712715	7.24344	0.303685	0.581582	1	9606	79832	NULL	11	11p13	glutamine and serine rich 1	protein-coding	QSER1	glutamine and serine rich 1	O	glutamine and serine-rich protein 1	QSER1	NO	#N/A
ENSG00000060762	0.246732	4.63763	7.73599	0.00541309	1	9606	51660	CGI-129	6	6q27	mitochondrial pyruvate carrier 1	protein-coding	MPC1	mitochondrial pyruvate carrier 1	O	HSPC040 protein|brain protein 44-like pr	MPC1	NO	#N/A
ENSG00000060971	-0.354512	4.90855	8.9294	0.00280617	1	9606	30	NULL	3	3p22.2	acetyl-CoA acyltransferase 1	protein-coding	ACAA1	acetyl-CoA acyltransferase 1	O	3-ketoacyl-CoA thiolase, peroxisomal|ace	ACAA1	NO	#N/A
ENSG00000060982	-0.0976463	7.80368	1.28028	0.257847	1	9606	586	NULL	12	12p12.1	branched chain amino-acid transaminase 1, cytosolic	protein-coding	BCAT1	branched chain amino-acid transaminase 1, cytosolic	O	branched chain aminotransferase 1, cytos	BCAT1	NO	#N/A
ENSG00000061273	-0.246749	5.69422	4.5813	0.0323227	1	9606	51564	NULL	12	12q13.1	histone deacetylase 7	protein-coding	HDAC7	histone deacetylase 7	O	HD7|histone deacetylase 7A	HDAC7	NO	#N/A
ENSG00000061337	1.01003	0.0893758	10.34	0.00130177	1	9606	11178	NULL	8	8p22	leucine zipper, putative tumor suppressor 1	protein-coding	LZTS1	leucine zipper, putative tumor suppressor 1	O	F37/Esophageal cancer-related gene-codin	LZTS1	NO	#N/A
ENSG00000061656	-0.177353	0.253297	0.380987	0.537075	1	9606	6676	RP1-309K20.4	20	20q11.21	sperm associated antigen 4	protein-coding	SPAG4	sperm associated antigen 4	O	SUN domain-containing protein 4|Sad1 and	SPAG4	NO	#N/A
ENSG00000061676	0.0672511	8.52121	0.613064	0.433636	1	9606	10787	NULL	2	2q32	NCK-associated protein 1	protein-coding	NCKAP1	NCK-associated protein 1	O	membrane-associated protein HEM-2|nck-as	NCKAP1	NO	#N/A
ENSG00000061794	0.235998	6.59571	8.30993	0.00394289	1	9606	60488	HDCMD11P	12	12p11	mitochondrial ribosomal protein S35	protein-coding	MRPS35	mitochondrial ribosomal protein S35	O	28S ribosomal protein S28, mitochondrial	MRPS35	NO	#N/A
ENSG00000061918	0.0459123	2.54038	0.100998	0.750635	1	9606	2983	NULL	4	4q31.3-q33	guanylate cyclase 1, soluble, beta 3	protein-coding	GUCY1B3	guanylate cyclase 1, soluble, beta 3	O	GCS-beta-1|GCS-beta-3|guanylate cyclase	GUCY1B3	NO	#N/A
ENSG00000061936	-0.316755	6.57609	18.0749	2.12386e-05	0.233306	9606	6433	NULL	12	12q24.33	splicing factor, suppressor of white-apricot homolog (Drosophila)	protein-coding	SFSWAP	splicing factor, suppressor of white-apricot homolog (Drosophila)	O	splicing factor, arginine/serine-rich 8	SFSWAP	NO	#N/A
ENSG00000061938	0.128417	5.64848	2.1835	0.139497	1	9606	10188	NULL	3	3q29	tyrosine kinase, non-receptor, 2	protein-coding	TNK2	tyrosine kinase, non-receptor, 2	O	activated CDC42 kinase 1|activated Cdc42	TNK2	NO	#N/A
ENSG00000061987	0.0631912	6.02863	0.457616	0.49874	1	9606	23041	NULL	12	12q14.1	MON2 homolog (S. cerevisiae)	protein-coding	MON2	MON2 homolog (S. cerevisiae)	O	protein MON2 homolog	MON2	NO	#N/A
ENSG00000062194	-0.0544178	6.28655	0.310793	0.577194	1	9606	65056	NULL	5	5q11.2	GC-rich promoter binding protein 1	protein-coding	GPBP1	GC-rich promoter binding protein 1	O	vascular wall-linked protein|vasculin	GPBP1	NO	#N/A
ENSG00000062282	-0.035683	1.64489	0.036786	0.847901	1	9606	84649	HMFN1045	11	11q13.5	diacylglycerol O-acyltransferase 2	protein-coding	DGAT2	diacylglycerol O-acyltransferase 2	O	acyl-CoA retinol O-fatty-acyltransferase	DGAT2	NO	#N/A
ENSG00000062370	0.399733	3.3083	9.32977	0.0022546	1	#N/A	#N/A	#N/A	#N/A	#N/A	#N/A	#N/A	#N/A	#N/A	#N/A	#N/A	ZNF112	NO	#N/A
ENSG00000062485	-0.240277	8.25053	15.2711	9.31299e-05	0.981589	9606	1431	NULL	12	12q13.2	citrate synthase	protein-coding	CS	citrate synthase	O	citrate synthase, mitochondrial	CS	NO	#N/A
ENSG00000062524	1.46644	1.6311	46.9859	7.14999e-12	9.24208e-08	9606	4058	NULL	15	15q15.1-q21.1	leukocyte receptor tyrosine kinase	protein-coding	LTK	leukocyte receptor tyrosine kinase	O	leukocyte tyrosine kinase receptor|prote	LTK	UP	LTK
ENSG00000062582	0.167319	7.24912	1.98924	0.158421	1	9606	64951	HSPC335	7	7p14	mitochondrial ribosomal protein S24	protein-coding	MRPS24	mitochondrial ribosomal protein S24	O	28S ribosomal protein S24, mitochondrial	MRPS24	NO	#N/A
ENSG00000062598	-0.106307	5.02542	1.00703	0.315616	1	9606	63916	RP11-394O2.2	20	20q13	engulfment and cell motility 2	protein-coding	ELMO2	engulfment and cell motility 2	O	PH domain protein CED12A|ced-12 homolog	ELMO2	NO	#N/A
ENSG00000062650	-0.164546	6.77406	4.23814	0.0395253	1	9606	23063	RP11-396M20.1	10	10q23.2	wings apart-like homolog (Drosophila)	protein-coding	WAPAL	wings apart-like homolog (Drosophila)	O	friend of EBNA2 (Epstein-Barr virus nucl	WAPAL	NO	#N/A
ENSG00000062716	0.81137	8.35072	173.538	1.24882e-39	1.72574e-35	9606	81671	HSPC292	17	17q23.1	vacuole membrane protein 1	protein-coding	VMP1	vacuole membrane protein 1	O	ectopic P-granules autophagy protein 3 h	VMP1	NO	#N/A
ENSG00000062725	0.139331	6.10289	3.42535	0.0642026	1	9606	10513	NULL	17	17q23.2	amyloid beta precursor protein (cytoplasmic tail) binding protein 2	protein-coding	APPBP2	amyloid beta precursor protein (cytoplasmic tail) binding protein 2	O	APP-BP2|amyloid beta precursor protein-b	APPBP2	NO	#N/A
ENSG00000062822	-0.108142	6.51655	1.55908	0.2118	1	9606	5424	NULL	19	19q13.3	polymerase (DNA directed), delta 1, catalytic subunit	protein-coding	POLD1	polymerase (DNA directed), delta 1, catalytic subunit	O	CDC2 homolog|DNA polymerase delta cataly	POLD1	NO	#N/A
ENSG00000063046	-0.140556	8.80288	5.47572	0.0192824	1	9606	1975	NULL	12	12q13.13	eukaryotic translation initiation factor 4B	protein-coding	EIF4B	eukaryotic translation initiation factor 4B	O	NULL	EIF4B	NO	#N/A
ENSG00000063169	-0.0109148	4.42795	0.010273	0.919268	1	9606	29998	NULL	19	19q13.3	glioma tumor suppressor candidate region gene 1	protein-coding	GLTSCR1	glioma tumor suppressor candidate region gene 1	O	glioma tumor suppressor candidate region	GLTSCR1	NO	#N/A
ENSG00000063176	-0.452258	5.01204	19.1775	1.19107e-05	0.132768	9606	56848	NULL	19	19q13.2	sphingosine kinase 2	protein-coding	SPHK2	sphingosine kinase 2	O	sphingosine kinase type 2	SPHK2	NO	#N/A
ENSG00000063177	-0.242036	8.7234	7.35362	0.0066928	1	9606	6141	NULL	19	19q13	ribosomal protein L18	protein-coding	RPL18	ribosomal protein L18	O	60S ribosomal protein L18	RPL18	NO	#N/A
ENSG00000063180	1.4136	0.651162	28.1945	1.09715e-07	0.00132196	9606	770	UNQ211/PRO237	19	19q13.3	carbonic anhydrase XI	protein-coding	CA11	carbonic anhydrase XI	O	CA-RP II|CA-XI|CARP XI|CARP-2|carbonic a	CA11	UP	CA11
ENSG00000063241	-0.237759	4.93966	5.59723	0.0179889	1	9606	79763	NULL	19	19q13.42	isochorismatase domain containing 2	protein-coding	ISOC2	isochorismatase domain containing 2	O	isochorismatase domain-containing protei	ISOC2	NO	#N/A
ENSG00000063244	-0.339795	8.09663	10.1285	0.00145997	1	9606	11338	NULL	19	19q13.42	U2 small nuclear RNA auxiliary factor 2	protein-coding	U2AF2	U2 small nuclear RNA auxiliary factor 2	O	U2 (RNU2) small nuclear RNA auxiliary fa	U2AF2	NO	#N/A
ENSG00000063245	-0.158099	7.98506	2.72611	0.0987193	1	9606	29924	NULL	19	19q13.42	epsin 1	protein-coding	EPN1	epsin 1	O	EH domain-binding mitotic phosphoprotein	EPN1	NO	#N/A
ENSG00000063322	0.112483	5.66009	2.09332	0.147944	1	9606	55588	NULL	19	19q13.2	mediator complex subunit 29	protein-coding	MED29	mediator complex subunit 29	O	intersex-like protein|mediator of RNA po	MED29	NO	#N/A
ENSG00000063438	0.0439832	4.28323	0.168247	0.681674	1	9606	57491	hCG_2044128	5	5p15.3	aryl-hydrocarbon receptor repressor	protein-coding	AHRR	aryl-hydrocarbon receptor repressor	O	ahR repressor|aryl hydrocarbon hydroxyla	AHRR	NO	#N/A
ENSG00000063587	-0.0516779	5.05105	0.156756	0.692161	1	9606	10838	NULL	X	Xq28	zinc finger protein 275	protein-coding	ZNF275	zinc finger protein 275	O	NULL	ZNF275	NO	#N/A
ENSG00000063601	0.152242	5.58627	2.78311	0.0952629	1	9606	8776	NULL	X	Xq28	myotubularin related protein 1	protein-coding	MTMR1	myotubularin related protein 1	O	myotubularin-related protein 1	MTMR1	NO	#N/A
ENSG00000063660	-1.71607	6.70834	395.534	5.16688e-88	7.18558e-84	9606	2817	NULL	2	2q35-q37	glypican 1	protein-coding	GPC1	glypican 1	O	glypican proteoglycan 1|glypican-1	GPC1	DOWN	GPC1
ENSG00000063761	0.199811	1.32846	0.965256	0.325866	1	9606	57143	NULL	14	14q24.3	aarF domain containing kinase 1	protein-coding	ADCK1	aarF domain containing kinase 1	O	uncharacterized aarF domain-containing p	ADCK1	NO	#N/A
ENSG00000063854	-0.842488	4.28074	23.9603	9.83412e-07	0.0114981	9606	3029	NULL	16	16p13.3	hydroxyacylglutathione hydrolase	protein-coding	HAGH	hydroxyacylglutathione hydrolase	O	glx II|glyoxalase II|hydroxyacylglutathi	HAGH	NO	#N/A
ENSG00000063978	-0.366606	6.59648	23.2684	1.40898e-06	0.0163766	9606	6047	RES4-26	4	4p16.3	ring finger protein 4	protein-coding	RNF4	ring finger protein 4	O	E3 ubiquitin ligase RNF4|E3 ubiquitin-pr	RNF4	NO	#N/A
ENSG00000064012	0.0319002	6.05207	0.170789	0.679411	1	9606	841	NULL	2	2q33-q34	caspase 8, apoptosis-related cysteine peptidase	protein-coding	CASP8	caspase 8, apoptosis-related cysteine peptidase	O	FADD-homologous ICE/CED-3-like protease|	CASP8	NO	#N/A
ENSG00000064102	0.243633	6.33243	11.4765	0.000704821	1	9606	55726	NULL	12	12p11.23	asunder spermatogenesis regulator	protein-coding	ASUN	asunder spermatogenesis regulator	O	asunder, spermatogenesis regulator homol	ASUN	NO	#N/A
ENSG00000064115	0.321544	7.24896	22.1235	2.55663e-06	0.0294114	9606	51768	NULL	12	12q11-q12	transmembrane 7 superfamily member 3	protein-coding	TM7SF3	transmembrane 7 superfamily member 3	O	seven span transmembrane protein|seven t	TM7SF3	NO	#N/A
ENSG00000064199	0.153839	3.72019	1.90865	0.167114	1	9606	53340	NULL	11	11q24.2	sperm autoantigenic protein 17	protein-coding	SPA17	sperm autoantigenic protein 17	O	cancer/testis antigen 22|sperm protein 1	SPA17	NO	#N/A
ENSG00000064225	0.30812	3.25998	6.42896	0.0112274	1	9606	10402	NULL	3	3q12.1	ST3 beta-galactoside alpha-2,3-sialyltransferase 6	protein-coding	ST3GAL6	ST3 beta-galactoside alpha-2,3-sialyltransferase 6	O	CMP-NeuAc:beta-galactoside alpha-2,3-sia	ST3GAL6	NO	#N/A
ENSG00000064309	0.113437	5.77978	1.35418	0.244549	1	9606	50937	NULL	11	11q24.2	cell adhesion associated, oncogene regulated	protein-coding	CDON	cell adhesion associated, oncogene regulated	O	Cdon homolog|cell adhesion molecule-rela	CDON	NO	#N/A
ENSG00000064313	-0.119942	6.19965	1.49332	0.221702	1	9606	6873	NULL	8	8q24.12	TAF2 RNA polymerase II, TATA box binding protein (TBP)-associated factor, 150kDa	protein-coding	TAF2	TAF2 RNA polymerase II, TATA box binding protein (TBP)-associated factor, 150kDa	O	150 kDa cofactor of initiator function|R	TAF2	NO	#N/A
ENSG00000064393	-0.403382	7.64089	13.5831	0.000228235	1	9606	28996	NULL	7	7q32-q34	homeodomain interacting protein kinase 2	protein-coding	HIPK2	homeodomain interacting protein kinase 2	O	hHIPk2|homeodomain-interacting protein k	HIPK2	NO	#N/A
ENSG00000064419	-0.081062	7.2427	1.18406	0.276532	1	9606	23534	NULL	7	7q32.1	transportin 3	protein-coding	TNPO3	transportin 3	O	imp12|importin 12|transportin-3|transpor	TNPO3	NO	#N/A
ENSG00000064489	1.14395	1.23734	27.6386	1.4623e-07	0.00175564	9606	4207	NULL	19	19p13.11	MEF2BNB-MEF2B readthrough	protein-coding	MEF2BNB-MEF2B	MEF2BNB-MEF2B readthrough	O	LOC729991-MEF2B readthrough|myocyte enha	MEF2BNB-MEF2B	UP	MEF2BNB-MEF2B
ENSG00000064490	-0.230258	4.28341	3.28221	0.0700344	1	9606	8625	NULL	19	19p12	regulatory factor X-associated ankyrin-containing protein	protein-coding	RFXANK	regulatory factor X-associated ankyrin-containing protein	O	DNA-binding protein RFXANK|RFX-Bdelta4|a	RFXANK	NO	#N/A
ENSG00000064545	-0.2455	4.44443	3.75678	0.0525937	1	9606	54929	UNQ582/PRO1152	19	19p13.11	transmembrane protein 161A	protein-coding	TMEM161A	transmembrane protein 161A	O	NULL	TMEM161A	NO	#N/A
ENSG00000064601	0.0587337	6.78577	0.596762	0.439816	1	9606	5476	RP3-337O18.1	20	20q13.1	cathepsin A	protein-coding	CTSA	cathepsin A	O	beta-galactosidase 2|beta-galactosidase	CTSA	NO	#N/A
ENSG00000064607	-0.0638871	7.38407	0.754926	0.384921	1	9606	10147	NULL	19	19p12	SURP and G patch domain containing 2	protein-coding	SUGP2	SURP and G patch domain containing 2	O	SURP and G-patch domain-containing prote	SUGP2	NO	#N/A
ENSG00000064651	0.108213	5.27006	1.16723	0.27997	1	9606	6558	NULL	5	5q23.3	solute carrier family 12 (sodium/potassium/chloride transporters), member 2	protein-coding	SLC12A2	solute carrier family 12 (sodium/potassium/chloride transporters), member 2	O	basolateral Na-K-Cl symporter|bumetanide	SLC12A2	NO	#N/A
ENSG00000064652	0.491886	3.22355	14.1993	0.000164435	1	9606	28966	SBBI31	5	5q23.2	sorting nexin 24	protein-coding	SNX24	sorting nexin 24	O	sorting nexin-24|sorting nexing 24	SNX24	NO	#N/A
ENSG00000064655	-0.229857	4.35641	5.0621	0.0244546	1	9606	2139	RP5-890O15.2	20	20q13.1	eyes absent homolog 2 (Drosophila)	protein-coding	EYA2	eyes absent homolog 2 (Drosophila)	O	eyes absent homolog 2	EYA2	NO	#N/A
ENSG00000064666	0.250165	4.07777	5.58489	0.018116	1	9606	1265	NULL	19	19p13.3	calponin 2	protein-coding	CNN2	calponin 2	O	calponin H2, smooth muscle|calponin-2|ne	CNN2	NO	#N/A
ENSG00000064687	0.154078	2.9773	1.3383	0.247334	1	9606	10347	NULL	19	19p13.3	ATP-binding cassette, sub-family A (ABC1), member 7	protein-coding	ABCA7	ATP-binding cassette, sub-family A (ABC1), member 7	O	ATP-binding cassette sub-family A member	ABCA7	NO	#N/A
ENSG00000064703	-0.11186	4.9032	1.17661	0.278047	1	9606	11218	NULL	1	1p21.1-p13.2	DEAD (Asp-Glu-Ala-Asp) box polypeptide 20	protein-coding	DDX20	DEAD (Asp-Glu-Ala-Asp) box polypeptide 20	O	DEAD box protein 20|DEAD box protein DP	DDX20	NO	#N/A
ENSG00000064726	0.0735938	6.61058	0.769564	0.380352	1	9606	53339	NULL	15	15q24	BTB (POZ) domain containing 1	protein-coding	BTBD1	BTB (POZ) domain containing 1	O	BTB domain containing 1|BTB/POZ domain-c	BTBD1	NO	#N/A
ENSG00000064763	-0.61463	3.87065	31.0687	2.49051e-08	0.000305088	9606	55711	NULL	12	12p11.22	fatty acyl CoA reductase 2	protein-coding	FAR2	fatty acyl CoA reductase 2	O	fatty acyl-CoA reductase 2|male sterilit	FAR2	NO	#N/A
ENSG00000064932	-0.514955	6.29315	44.231	2.91823e-11	3.74846e-07	9606	22904	NULL	19	19p13.3	strawberry notch homolog 2 (Drosophila)	protein-coding	SBNO2	strawberry notch homolog 2 (Drosophila)	O	protein strawberry notch homolog 2	SBNO2	NO	#N/A
ENSG00000064933	0.54425	5.42622	35.8749	2.10401e-09	2.63422e-05	9606	5378	NULL	2	2q31.1	PMS1 postmeiotic segregation increased 1 (S. cerevisiae)	protein-coding	PMS1	PMS1 postmeiotic segregation increased 1 (S. cerevisiae)	O	DNA mismatch repair protein PMS1|PMS1 pr	PMS1	NO	#N/A
ENSG00000064961	-0.445687	6.11705	26.2153	3.05387e-07	0.00363136	9606	10362	NULL	19	19p13.3	high mobility group 20B	protein-coding	HMG20B	high mobility group 20B	O	BRCA2-associated factor 35|HMG box domai	HMG20B	NO	#N/A
ENSG00000064989	0.0386231	2.16496	0.0583566	0.809113	1	9606	10203	NULL	2	2q32.1	calcitonin receptor-like	protein-coding	CALCRL	calcitonin receptor-like	O	CGRP type 1 receptor|calcitonin gene-rel	CALCRL	NO	#N/A
ENSG00000064995	-0.0990965	4.60389	0.869139	0.351194	1	9606	6882	PRO2134	6	6p21.31	TAF11 RNA polymerase II, TATA box binding protein (TBP)-associated factor, 28kDa	protein-coding	TAF11	TAF11 RNA polymerase II, TATA box binding protein (TBP)-associated factor, 28kDa	O	TAF(II)28|TAFII-28|TATA box binding prot	TAF11	NO	#N/A
ENSG00000064999	-0.0117344	5.34453	0.0176092	0.894431	1	9606	23294	NULL	6	6p21.31	ankyrin repeat and sterile alpha motif domain containing 1A	protein-coding	ANKS1A	ankyrin repeat and sterile alpha motif domain containing 1A	O	Odin|ankyrin repeat and SAM domain conta	ANKS1A	NO	#N/A
ENSG00000065000	-0.992613	7.85221	190.427	2.56462e-43	3.54943e-39	9606	8943	PRO0039	19	19p13.3	adaptor-related protein complex 3, delta 1 subunit	protein-coding	AP3D1	adaptor-related protein complex 3, delta 1 subunit	O	AP-3 complex delta subunit, partial CDS|	AP3D1	NO	#N/A
ENSG00000065029	0.130083	4.54518	1.11909	0.290115	1	9606	7629	RP3-329A5.7	6	6p21.31	zinc finger protein 76	protein-coding	ZNF76	zinc finger protein 76	O	zinc finger protein 523|zinc finger prot	ZNF76	NO	#N/A
ENSG00000065054	-1.18767	5.97998	115.745	5.4061e-27	7.40203e-23	9606	9351	NULL	16	16p13.3	solute carrier family 9, subfamily A (NHE3, cation proton antiporter 3), member 3 regulator 2	protein-coding	SLC9A3R2	solute carrier family 9, subfamily A (NHE3, cation proton antiporter 3), member 3 regulator 2	O	NHE3 kinase A regulatory protein E3KARP|	SLC9A3R2	DOWN	SLC9A3R2
ENSG00000065057	-1.15994	3.89952	41.1448	1.41359e-10	1.80007e-06	9606	4913	NULL	16	16p13.3	nth endonuclease III-like 1 (E. coli)	protein-coding	NTHL1	nth endonuclease III-like 1 (E. coli)	O	endonuclease III-like protein 1	NTHL1	DOWN	NTHL1
ENSG00000065060	-0.21848	4.69918	2.68217	0.101478	1	9606	54887	RP3-349A12.1	6	6p21	UHRF1 binding protein 1	protein-coding	UHRF1BP1	UHRF1 binding protein 1	O	ICBP90 binding protein 1|ICBP90-binding	UHRF1BP1	NO	#N/A
ENSG00000065135	-0.0765841	7.1733	1.19064	0.2752	1	9606	2773	RP5-1160K1.2	1	1p13	guanine nucleotide binding protein (G protein), alpha inhibiting activity polypeptide 3	protein-coding	GNAI3	guanine nucleotide binding protein (G protein), alpha inhibiting activity polypeptide 3	O	g(i) alpha-3|guanine nucleotide-binding	GNAI3	NO	#N/A
ENSG00000065150	-0.090375	8.96459	1.08264	0.298108	1	9606	3843	RP11-72J7.1	13	13q32.2	importin 5	protein-coding	IPO5	importin 5	O	RAN binding protein 5|Ran_GTP binding pr	IPO5	NO	#N/A
ENSG00000065154	-0.00892474	6.41406	0.014546	0.904002	1	9606	4942	NULL	10	10q26	ornithine aminotransferase	protein-coding	OAT	ornithine aminotransferase	O	gyrate atrophy|ornithine aminotransferas	OAT	NO	#N/A
ENSG00000065183	-0.0805045	7.39961	1.39021	0.238369	1	9606	10885	RP4-776P7.1	1	1p12	WD repeat domain 3	protein-coding	WDR3	WD repeat domain 3	O	WD repeat-containing protein 3|dJ776P7.2	WDR3	NO	#N/A
ENSG00000065243	-0.194691	6.04254	2.67978	0.10163	1	9606	5586	RP5-905H16.1	1	1p22.2	protein kinase N2	protein-coding	PKN2	protein kinase N2	O	PKN gamma|cardiolipin-activated protein	PKN2	NO	#N/A
ENSG00000065268	-0.621813	5.61834	32.684	1.08426e-08	0.000133895	9606	57418	NULL	19	19p13.3	WD repeat domain 18	protein-coding	WDR18	WD repeat domain 18	O	Involved in Processing ITS2 3 homolog|WD	WDR18	NO	#N/A
ENSG00000065308	0.255758	7.42429	9.62067	0.001924	1	9606	9697	NULL	6	6p21.1-p12	translocation associated membrane protein 2	protein-coding	TRAM2	translocation associated membrane protein 2	O	TRAM-like protein|translocating chain-as	TRAM2	NO	#N/A
ENSG00000065328	-0.0428931	6.26594	0.268146	0.604578	1	9606	55388	PRO2249	10	10p13	minichromosome maintenance complex component 10	protein-coding	MCM10	minichromosome maintenance complex component 10	O	MCM10 minichromosome maintenance deficie	MCM10	NO	#N/A
ENSG00000065357	0.609683	4.9141	49.3188	2.17568e-12	2.8273e-08	9606	1606	NULL	12	12q13.3	diacylglycerol kinase, alpha 80kDa	protein-coding	DGKA	diacylglycerol kinase, alpha 80kDa	O	80 kDa diacylglycerol kinase|DAG kinase	DGKA	NO	#N/A
ENSG00000065361	-0.274751	-0.0928372	0.711888	0.398818	1	9606	2065	NULL	12	12q13	v-erb-b2 erythroblastic leukemia viral oncogene homolog 3 (avian)	protein-coding	ERBB3	v-erb-b2 erythroblastic leukemia viral oncogene homolog 3 (avian)	O	proto-oncogene-like protein c-ErbB-3|rec	ERBB3	NO	#N/A
ENSG00000065413	-0.404342	3.58781	12.678	0.000369985	1	9606	91526	NULL	2	2q33.1	ankyrin repeat domain 44	protein-coding	ANKRD44	ankyrin repeat domain 44	O	ankyrin repeat domain-containing protein	ANKRD44	NO	#N/A
ENSG00000065427	0.0930979	8.43299	1.93242	0.164494	1	9606	3735	NULL	16	16q23.1	lysyl-tRNA synthetase	protein-coding	KARS	lysyl-tRNA synthetase	O	lysRS|lysine tRNA ligase|lysine--tRNA li	KARS	NO	#N/A
ENSG00000065457	0.105713	6.04014	1.98086	0.1593	1	9606	23536	NULL	16	16q23.1	adenosine deaminase, tRNA-specific 1	protein-coding	ADAT1	adenosine deaminase, tRNA-specific 1	O	adenosine deaminase acting on tRNA|tRNA-	ADAT1	NO	#N/A
ENSG00000065485	0.025631	4.3698	0.0733353	0.786541	1	9606	10954	NULL	3	3q21.1	protein disulfide isomerase family A, member 5	protein-coding	PDIA5	protein disulfide isomerase family A, member 5	O	protein disulfide isomerase-associated 5	PDIA5	NO	#N/A
ENSG00000065491	0.139512	3.75689	1.44734	0.228955	1	9606	55633	NULL	6	6p21.2	TBC1 domain family, member 22B	protein-coding	TBC1D22B	TBC1 domain family, member 22B	O	TBC1 domain family member 22B	TBC1D22B	NO	#N/A
ENSG00000065518	-0.000417209	6.68771	2.7614e-05	0.995807	1	9606	4710	NULL	3	3q13.33	NADH dehydrogenase (ubiquinone) 1 beta subcomplex, 4, 15kDa	protein-coding	NDUFB4	NADH dehydrogenase (ubiquinone) 1 beta subcomplex, 4, 15kDa	O	NADH dehydrogenase [ubiquinone] 1 beta s	NDUFB4	NO	#N/A
ENSG00000065526	0.0546883	6.31176	0.257098	0.612121	1	9606	23013	RP1-134O19.1	1	1p36	spen homolog, transcriptional regulator (Drosophila)	protein-coding	SPEN	spen homolog, transcriptional regulator (Drosophila)	O	Msx2 interacting nuclear target (MINT) h	SPEN	NO	#N/A
ENSG00000065534	0.599362	4.18637	30.9949	2.58702e-08	0.000316703	9606	4638	NULL	3	3q21	myosin light chain kinase	protein-coding	MYLK	myosin light chain kinase	O	kinase-related protein|myosin light chai	MYLK	NO	#N/A
ENSG00000065548	-0.0962376	7.35257	1.34305	0.246497	1	9606	55854	HSPC303	2	2q32.1	zinc finger CCCH-type containing 15	protein-coding	ZC3H15	zinc finger CCCH-type containing 15	O	DRG family-regulatory protein 1|likely o	ZC3H15	NO	#N/A
ENSG00000065559	-0.0796131	4.63052	0.696249	0.404047	1	9606	6416	NULL	17	17p12	mitogen-activated protein kinase kinase 4	protein-coding	MAP2K4	mitogen-activated protein kinase kinase 4	O	JNK activating kinase 1|JNK-activated ki	MAP2K4	NO	#N/A
ENSG00000065600	-0.0784292	4.82675	0.539244	0.462746	1	9606	55248	NULL	1	1q32.3	transmembrane protein 206	protein-coding	TMEM206	transmembrane protein 206	O	NULL	TMEM206	NO	#N/A
ENSG00000065613	0.00705432	6.59137	0.00504266	0.943388	1	9606	9748	NULL	10	10q24.33	STE20-like kinase	protein-coding	SLK	STE20-like kinase	O	CTCL tumor antigen se20-9|Long Ste20-lik	SLK	NO	#N/A
ENSG00000065615	-0.0291503	4.62757	0.102522	0.748823	1	9606	51167	NULL	6	6pter-q22.33	cytochrome b5 reductase 4	protein-coding	CYB5R4	cytochrome b5 reductase 4	O	N-terminal cytochrome b5 and cytochrome	CYB5R4	NO	#N/A
ENSG00000065621	1.4307	0.480672	25.644	4.10565e-07	0.00486068	9606	119391	RP11-127L20.2	10	10q25.1	glutathione S-transferase omega 2	protein-coding	GSTO2	glutathione S-transferase omega 2	O	GSTO-2|MMA(V) reductase|bA127L20.1 (nove	GSTO2	UP	GSTO2
ENSG00000065665	0.0218983	3.36613	0.0263341	0.871087	1	9606	55176	NULL	10	10p14	Sec61 alpha 2 subunit (S. cerevisiae)	protein-coding	SEC61A2	Sec61 alpha 2 subunit (S. cerevisiae)	O	Sec61 alpha form 2|protein transport pro	SEC61A2	NO	#N/A
ENSG00000065675	-0.175552	0.766084	0.519276	0.471151	1	9606	5588	RP11-563J2.1	10	10p15	protein kinase C, theta	protein-coding	PRKCQ	protein kinase C, theta	O	protein kinase C theta type	PRKCQ	NO	#N/A
ENSG00000065802	0.105951	5.77205	1.94014	0.163653	1	9606	51665	NULL	2	2q37	ankyrin repeat and SOCS box containing 1	protein-coding	ASB1	ankyrin repeat and SOCS box containing 1	O	ankyrin repeat and SOCS box protein 1|an	ASB1	NO	#N/A
ENSG00000065809	0.409268	5.54815	25.0059	5.71551e-07	0.00673858	9606	83641	RP11-153L18.1	10	10p13	family with sequence similarity 107, member B	protein-coding	FAM107B	family with sequence similarity 107, member B	O	protein FAM107B	FAM107B	NO	#N/A
ENSG00000065833	-0.266511	5.77506	11.735	0.000613351	1	9606	4199	NULL	6	6q12	malic enzyme 1, NADP(+)-dependent, cytosolic	protein-coding	ME1	malic enzyme 1, NADP(+)-dependent, cytosolic	O	Malic enzyme, cytoplasmic|NADP-ME|NADP-d	ME1	NO	#N/A
ENSG00000065882	0.327964	7.2468	16.69	4.40134e-05	0.47398	9606	23216	NULL	4	4p14	TBC1 (tre-2/USP6, BUB2, cdc16) domain family, member 1	protein-coding	TBC1D1	TBC1 (tre-2/USP6, BUB2, cdc16) domain family, member 1	O	TBC1 domain family member 1	TBC1D1	NO	#N/A
ENSG00000065883	-0.371253	6.88969	20.5855	5.70254e-06	0.0645869	9606	8621	NULL	7	7p13	cyclin-dependent kinase 13	protein-coding	CDK13	cyclin-dependent kinase 13	O	CDC2-related protein kinase 5|cell divis	CDK13	NO	#N/A
ENSG00000065911	0.154797	6.91524	4.08662	0.0432241	1	9606	10797	NULL	2	2p13.1	methylenetetrahydrofolate dehydrogenase (NADP+ dependent) 2, methenyltetrahydrofolate cyclohydrolase	protein-coding	MTHFD2	methylenetetrahydrofolate dehydrogenase (NADP+ dependent) 2, methenyltetrahydrofolate cyclohydrolase	O	NAD-dependent methylene tetrahydrofolate	MTHFD2	NO	#N/A
ENSG00000065923	0.0878717	5.07496	0.747121	0.387389	1	9606	84679	NULL	X	Xp11.3|Xp11.3	solute carrier family 9, subfamily A (NHE7, cation proton antiporter 7), member 7	protein-coding	SLC9A7	solute carrier family 9, subfamily A (NHE7, cation proton antiporter 7), member 7	O	Na(+)/H(+) exchanger 7|nonselective sodi	SLC9A7	NO	#N/A
ENSG00000065970	-0.0168793	4.96969	0.0356113	0.85032	1	9606	55810	NULL	12	12p13.31	forkhead box J2	protein-coding	FOXJ2	forkhead box J2	O	FOXJ2 forkhead factor|fork head homologo	FOXJ2	NO	#N/A
ENSG00000065978	-0.440329	9.43269	28.8181	7.9504e-08	0.000961998	9606	4904	NULL	1	1p34	Y box binding protein 1	protein-coding	YBX1	Y box binding protein 1	O	CBF-A|CCAAT-binding transcription factor	YBX1	NO	#N/A
ENSG00000065989	0.0551827	5.75307	0.46998	0.492996	1	9606	5141	NULL	19	19p13.2	phosphodiesterase 4A, cAMP-specific	protein-coding	PDE4A	phosphodiesterase 4A, cAMP-specific	O	cAMP-specific 3',5'-cyclic phosphodieste	PDE4A	NO	#N/A
ENSG00000066027	-0.0824433	5.63931	0.918733	0.337808	1	9606	5525	NULL	1	1q32.2-q32.3	protein phosphatase 2, regulatory subunit B', alpha	protein-coding	PPP2R5A	protein phosphatase 2, regulatory subunit B', alpha	O	PP2A B subunit isoform B'-alpha|PP2A B s	PPP2R5A	NO	#N/A
ENSG00000066044	-0.739431	7.27845	112.318	3.04285e-26	4.16323e-22	9606	1994	NULL	19	19p13.2	ELAV (embryonic lethal, abnormal vision, Drosophila)-like 1 (Hu antigen R)	protein-coding	ELAVL1	ELAV (embryonic lethal, abnormal vision, Drosophila)-like 1 (Hu antigen R)	O	ELAV-like protein 1|Hu antigen R|embryon	ELAVL1	NO	#N/A
ENSG00000066056	0.781186	0.703016	9.46501	0.00209428	1	9606	7075	RP11-282K6.6	1	1p34-p33	tyrosine kinase with immunoglobulin-like and EGF-like domains 1	protein-coding	TIE1	tyrosine kinase with immunoglobulin-like and EGF-like domains 1	O	tyrosine kinase with immunoglobulin and	TIE1	NO	#N/A
ENSG00000066084	-0.0566479	6.01593	0.444431	0.504991	1	9606	57609	NULL	12	12q13.12	DIP2 disco-interacting protein 2 homolog B (Drosophila)	protein-coding	DIP2B	DIP2 disco-interacting protein 2 homolog B (Drosophila)	O	disco-interacting protein 2 homolog B	DIP2B	NO	#N/A
ENSG00000066117	-0.347267	6.80574	27.2298	1.8065e-07	0.00216274	9606	6602	NULL	12	12q13-q14	SWI/SNF related, matrix associated, actin dependent regulator of chromatin, subfamily d, member 1	protein-coding	SMARCD1	SWI/SNF related, matrix associated, actin dependent regulator of chromatin, subfamily d, member 1	O	60 kDa BRG-1/Brm-associated factor subun	SMARCD1	NO	#N/A
ENSG00000066135	-0.0856747	4.98552	0.9019	0.342273	1	9606	9682	NULL	1	1p34.1	lysine (K)-specific demethylase 4A	protein-coding	KDM4A	lysine (K)-specific demethylase 4A	O	jmjC domain-containing histone demethyla	KDM4A	NO	#N/A
ENSG00000066136	-0.37302	5.18002	18.3238	1.86367e-05	0.205545	9606	4802	RP5-1066H13.1	1	1p32	nuclear transcription factor Y, gamma	protein-coding	NFYC	nuclear transcription factor Y, gamma	O	CAAT box DNA-binding protein subunit C|C	NFYC	NO	#N/A
ENSG00000066248	-0.847044	4.96677	66.1111	4.26199e-16	5.67356e-12	9606	25791	NULL	2	2q37	neuronal guanine nucleotide exchange factor	protein-coding	NGEF	neuronal guanine nucleotide exchange factor	O	eph-interacting exchange protein|ephexin	NGEF	NO	#N/A
ENSG00000066279	-0.246337	7.59015	4.3439	0.0371417	1	9606	259266	RP11-32D17.1	1	1q31	asp (abnormal spindle) homolog, microcephaly associated (Drosophila)	protein-coding	ASPM	asp (abnormal spindle) homolog, microcephaly associated (Drosophila)	O	abnormal spindle-like microcephaly-assoc	ASPM	NO	#N/A
ENSG00000066322	-0.351569	5.56088	17.6113	2.70966e-05	0.295652	9606	64834	CGI-88	1	1p34.2	ELOVL fatty acid elongase 1	protein-coding	ELOVL1	ELOVL fatty acid elongase 1	O	3-keto acyl-CoA synthase ELOVL1|ELOVL FA	ELOVL1	NO	#N/A
ENSG00000066379	-0.297341	3.70346	6.46349	0.0110113	1	9606	30834	DAAP-65D20.6	6	6p21.3	zinc ribbon domain containing 1	protein-coding	ZNRD1	zinc ribbon domain containing 1	O	DNA-directed RNA polymerase I subunit RP	ZNRD1	NO	#N/A
ENSG00000066382	0.547752	1.34828	7.20744	0.00726021	1	9606	744	NULL	11	11p13	metallophosphoesterase domain containing 2	protein-coding	MPPED2	metallophosphoesterase domain containing 2	O	fetal brain protein 239|metallophosphoes	MPPED2	NO	#N/A
ENSG00000066422	0.150552	6.42228	2.87274	0.0900914	1	9606	27107	NULL	3	3q12.3	zinc finger and BTB domain containing 11	protein-coding	ZBTB11	zinc finger and BTB domain containing 11	O	zinc finger and BTB domain-containing pr	ZBTB11	NO	#N/A
ENSG00000066427	0.808272	3.16212	40.2308	2.25667e-10	2.86417e-06	9606	4287	NULL	14	14q21	ataxin 3	protein-coding	ATXN3	ataxin 3	O	Machado-Joseph disease (spinocerebellar	ATXN3	NO	#N/A
ENSG00000066455	0.223621	4.67476	4.56227	0.0326837	1	9606	9950	PIG31	14	14q32.12	golgin A5	protein-coding	GOLGA5	golgin A5	O	Golgin subfamily A member 5|RET-fused ge	GOLGA5	NO	#N/A
ENSG00000066557	0.428458	4.56937	12.0479	0.000518517	1	9606	55631	RP4-677H15.1	1	1p31.1	leucine rich repeat containing 40	protein-coding	LRRC40	leucine rich repeat containing 40	O	leucine-rich repeat-containing protein 4	LRRC40	NO	#N/A
ENSG00000066583	-0.042746	4.78161	0.189241	0.663549	1	9606	51015	CGI-111	5	5q22.1-q33.3	isochorismatase domain containing 1	protein-coding	ISOC1	isochorismatase domain containing 1	O	isochorismatase domain-containing protei	ISOC1	NO	#N/A
ENSG00000066629	-0.0206137	5.20683	0.0435142	0.83476	1	9606	2009	NULL	14	14q32	echinoderm microtubule associated protein like 1	protein-coding	EML1	echinoderm microtubule associated protein like 1	O	EMAP-1|echinoderm microtubule-associated	EML1	NO	#N/A
ENSG00000066651	0.179501	5.23733	3.68861	0.0547852	1	9606	60487	RP1-187J11.2	6	6q11.1-q22.33	tRNA methyltransferase 11 homolog (S. cerevisiae)	protein-coding	TRMT11	tRNA methyltransferase 11 homolog (S. cerevisiae)	O	tRNA (guanine(10)-N2)-methyltransferase	TRMT11	NO	#N/A
ENSG00000066654	-0.287652	6.23239	10.8	0.001015	1	9606	55623	NULL	16	16p12.3	THUMP domain containing 1	protein-coding	THUMPD1	THUMP domain containing 1	O	THUMP domain-containing protein 1	THUMPD1	NO	#N/A
ENSG00000066697	0.120786	6.31433	2.29645	0.12967	1	9606	91283	L8	9	9q31.1	Myb/SANT-like DNA-binding domain containing 3	protein-coding	MSANTD3	Myb/SANT-like DNA-binding domain containing 3	O	UPF0439 protein C9orf30|myb/SANT-like DN	MSANTD3	NO	#N/A
ENSG00000066739	0.176788	4.6601	2.61703	0.105722	1	9606	55102	NULL	14	14q32.2	autophagy related 2B	protein-coding	ATG2B	autophagy related 2B	O	ATG2 autophagy related 2 homolog B|autop	ATG2B	NO	#N/A
ENSG00000066777	-0.144143	5.50867	2.22465	0.135824	1	9606	10565	NULL	8	8q13	ADP-ribosylation factor guanine nucleotide-exchange factor 1 (brefeldin A-inhibited)	protein-coding	ARFGEF1	ADP-ribosylation factor guanine nucleotide-exchange factor 1 (brefeldin A-inhibited)	O	brefeldin A-inhibited guanine nucleotide	ARFGEF1	NO	#N/A
ENSG00000066827	-0.211745	3.60204	3.14859	0.0759925	1	9606	57623	NULL	8	8q24.22	zinc finger and AT hook domain containing	protein-coding	ZFAT	zinc finger and AT hook domain containing	O	zinc finger gene in autoimmune thyroid d	ZFAT	NO	#N/A
ENSG00000066855	-0.032526	4.52406	0.0696059	0.791911	1	9606	9650	NULL	8	8q13.1	mitochondrial fission regulator 1	protein-coding	MTFR1	mitochondrial fission regulator 1	O	chondrocyte protein with a poly-proline	MTFR1	NO	#N/A
ENSG00000066923	-0.12783	0.706698	0.269081	0.603949	1	9606	10734	NULL	7	7q22.1	stromal antigen 3	protein-coding	STAG3	stromal antigen 3	O	SCC3 homolog 3|cohesin subunit SA-3|stro	STAG3	NO	#N/A
ENSG00000066926	-0.287921	4.03033	7.77804	0.00528852	1	9606	2235	NULL	18	18q21.3	ferrochelatase	protein-coding	FECH	ferrochelatase	O	ferrochelatase, mitochondrial|heme synth	FECH	NO	#N/A
ENSG00000066933	-0.0852792	5.08237	0.526784	0.467962	1	9606	4649	NULL	15	15q22-q23	myosin IXA	protein-coding	MYO9A	myosin IXA	O	myosin-IXa|unconventional myosin-9a|unco	MYO9A	NO	#N/A
ENSG00000067057	-0.618451	7.59865	76.9574	1.74684e-18	2.34862e-14	9606	5214	RP11-298E9.2	10	10p15.3-p15.2	phosphofructokinase, platelet	protein-coding	PFKP	phosphofructokinase, platelet	O	6-phosphofructokinase type C|6-phosphofr	PFKP	NO	#N/A
ENSG00000067064	-0.166417	6.25884	3.65696	0.0558354	1	9606	3422	NULL	10	10p15.3	isopentenyl-diphosphate delta isomerase 1	protein-coding	IDI1	isopentenyl-diphosphate delta isomerase 1	O	IPP isomerase 1|isopentenyl diphosphate	IDI1	NO	#N/A
ENSG00000067066	0.242369	6.63254	11.7659	0.000603246	1	9606	6672	NULL	2	2q37.1	SP100 nuclear antigen	protein-coding	SP100	SP100 nuclear antigen	O	SP100-HMG nuclear autoantigen|nuclear au	SP100	NO	#N/A
ENSG00000067082	-0.0530081	6.91508	0.611967	0.434048	1	9606	1316	RP11-184A2.1	10	10p15	Kruppel-like factor 6	protein-coding	KLF6	Kruppel-like factor 6	O	B-cell-derived protein 1|GC-rich binding	KLF6	NO	#N/A
ENSG00000067113	0.290558	3.33848	4.98952	0.0255012	1	9606	8611	NULL	5	5q11	phosphatidic acid phosphatase type 2A	protein-coding	PPAP2A	phosphatidic acid phosphatase type 2A	O	lipid phosphate phosphohydrolase 1|lipid	PPAP2A	NO	#N/A
ENSG00000067141	0.0824156	6.87758	0.92286	0.336725	1	9606	4756	NULL	15	15q22.3-q23	neogenin 1	protein-coding	NEO1	neogenin 1	O	immunoglobulin superfamily DCC subclass	NEO1	NO	#N/A
ENSG00000067167	0.0858007	6.11213	0.946793	0.330537	1	9606	23471	NULL	8	8q13.3	translocation associated membrane protein 1	protein-coding	TRAM1	translocation associated membrane protein 1	O	translocating chain-associated membrane	TRAM1	NO	#N/A
ENSG00000067177	0.260397	5.53549	9.4564	0.00210413	1	9606	5255	NULL	X	Xq12-q13	phosphorylase kinase, alpha 1 (muscle)	protein-coding	PHKA1	phosphorylase kinase, alpha 1 (muscle)	O	phosphorylase b kinase regulatory subuni	PHKA1	NO	#N/A
ENSG00000067182	-0.615351	7.2422	86.7474	1.23306e-20	1.66771e-16	9606	7132	NULL	12	12p13.2	tumor necrosis factor receptor superfamily, member 1A	protein-coding	TNFRSF1A	tumor necrosis factor receptor superfamily, member 1A	O	TNF-R1|TNF-RI|TNFR-I|tumor necrosis fact	TNFRSF1A	NO	#N/A
ENSG00000067191	0.0237629	3.66079	0.0325955	0.856727	1	9606	782	NULL	17	17q21-q22	calcium channel, voltage-dependent, beta 1 subunit	protein-coding	CACNB1	calcium channel, voltage-dependent, beta 1 subunit	O	calcium channel voltage-dependent subuni	CACNB1	NO	#N/A
ENSG00000067208	-0.0027583	4.59187	0.000693628	0.978989	1	9606	7813	NULL	1	1p22.1	ecotropic viral integration site 5	protein-coding	EVI5	ecotropic viral integration site 5	O	EVI-5|dJ846D11.1 (ecotropic viral integr	EVI5	NO	#N/A
ENSG00000067221	0.113046	4.03341	1.13506	0.286699	1	9606	9399	MSTP019	15	15q24-q25	stomatin (EPB72)-like 1	protein-coding	STOML1	stomatin (EPB72)-like 1	O	EPB72-like protein 1|protein unc-24 homo	STOML1	NO	#N/A
ENSG00000067225	-0.227559	11.2489	11.0229	0.000899934	1	9606	5315	NULL	15	15q22	pyruvate kinase, muscle	protein-coding	PKM	pyruvate kinase, muscle	O	OIP-3|OPA-interacting protein 3|PK, musc	PKM	NO	#N/A
ENSG00000067248	-0.232719	5.63867	5.47318	0.0193105	1	9606	54505	NULL	5	5q11.2	DEAH (Asp-Glu-Ala-His) box polypeptide 29	protein-coding	DHX29	DEAH (Asp-Glu-Ala-His) box polypeptide 29	O	ATP-dependent RNA helicase DHX29|DEAD/H	DHX29	NO	#N/A
ENSG00000067334	-0.356337	6.82939	13.6577	0.000219336	1	9606	30836	NULL	1	1p22.1	deoxynucleotidyltransferase, terminal, interacting protein 2	protein-coding	DNTTIP2	deoxynucleotidyltransferase, terminal, interacting protein 2	O	LPTS-interacting protein 2|acidic 82 kDa	DNTTIP2	NO	#N/A
ENSG00000067365	0.107105	4.46718	0.755688	0.384681	1	9606	79091	LP8272	16	16p13.2	methyltransferase like 22	protein-coding	METTL22	methyltransferase like 22	O	LP8272|methyltransferase-like protein 22	METTL22	NO	#N/A
ENSG00000067369	-0.256509	6.42098	12.532	0.000400031	1	9606	7158	NULL	15	15q15-q21	tumor protein p53 binding protein 1	protein-coding	TP53BP1	tumor protein p53 binding protein 1	O	p53-binding protein 1|p53BP1|tumor prote	TP53BP1	NO	#N/A
ENSG00000067445	0.607489	5.27253	43.4631	4.32025e-11	5.53855e-07	9606	7216	RP6-14C6.1	X	Xp11.22-p11.21	trophinin	protein-coding	TRO	trophinin	O	MAGE superfamily protein|MAGE-D3 antigen	TRO	NO	#N/A
ENSG00000067533	-0.348437	5.71536	13.4651	0.000243044	1	9606	51018	CGI-115	1	1q41	ribosomal RNA processing 15 homolog (S. cerevisiae)	protein-coding	RRP15	ribosomal RNA processing 15 homolog (S. cerevisiae)	O	RRP15-like protein|ribosomal RNA-process	RRP15	NO	#N/A
ENSG00000067560	-0.0111255	9.7855	0.0280712	0.866942	1	9606	387	NULL	3	3p21.3	ras homolog family member A	protein-coding	RHOA	ras homolog family member A	O	Aplysia ras-related homolog 12|h12|oncog	RHOA	NO	#N/A
ENSG00000067596	-0.161211	7.69023	5.12755	0.0235489	1	9606	1659	NULL	17	17q21.31	DEAH (Asp-Glu-Ala-His) box polypeptide 8	protein-coding	DHX8	DEAH (Asp-Glu-Ala-His) box polypeptide 8	O	ATP-dependent RNA helicase DHX8|DEAD/H (	DHX8	NO	#N/A
ENSG00000067606	-0.754971	1.09183	11.491	0.000699346	1	9606	5590	RP11-181G12.1	1	1p36.33-p36.2	protein kinase C, zeta	protein-coding	PRKCZ	protein kinase C, zeta	O	nPKC-zeta|protein kinase C zeta type	PRKCZ	NO	#N/A
ENSG00000067704	-0.12997	8.35902	3.72491	0.0536066	1	9606	55699	NULL	1	1q41	isoleucyl-tRNA synthetase 2, mitochondrial	protein-coding	IARS2	isoleucyl-tRNA synthetase 2, mitochondrial	O	isoleucine tRNA ligase 2, mitochondrial|	IARS2	NO	#N/A
ENSG00000067715	-0.0473128	4.72494	0.17078	0.67942	1	9606	6857	NULL	12	12cen-q21	synaptotagmin I	protein-coding	SYT1	synaptotagmin I	O	synaptotagmin 1|synaptotagmin-1|sytI	SYT1	NO	#N/A
ENSG00000067798	-0.320913	2.39067	4.41744	0.0355734	1	9606	89795	NULL	12	12q14.3	neuron navigator 3	protein-coding	NAV3	neuron navigator 3	O	pore membrane and/or filament interactin	NAV3	NO	#N/A
ENSG00000067829	-0.098319	5.52946	1.08956	0.296569	1	9606	3421	hCG_2004980	X	Xq28	isocitrate dehydrogenase 3 (NAD+) gamma	protein-coding	IDH3G	isocitrate dehydrogenase 3 (NAD+) gamma	O	IDH-gamma|NAD (H)-specific isocitrate de	IDH3G	NO	#N/A
ENSG00000067836	-0.0301324	2.4788	0.0393351	0.842786	1	9606	79641	NULL	16	16p13.3	rogdi homolog (Drosophila)	protein-coding	ROGDI	rogdi homolog (Drosophila)	O	leucine zipper domain protein|protein ro	ROGDI	NO	#N/A
ENSG00000067900	-0.112361	5.90406	0.950081	0.329699	1	9606	6093	NULL	18	18q11.1	Rho-associated, coiled-coil containing protein kinase 1	protein-coding	ROCK1	Rho-associated, coiled-coil containing protein kinase 1	O	Rho kinase|p160 ROCK-1|p160-ROCK|renal c	ROCK1	NO	#N/A
ENSG00000067955	-0.196902	6.46135	6.19912	0.0127814	1	9606	865	NULL	16	16q22.1	core-binding factor, beta subunit	protein-coding	CBFB	core-binding factor, beta subunit	O	CBF-beta|PEA2-beta|PEBP2-beta|SL3-3 enha	CBFB	NO	#N/A
ENSG00000067992	0.0116397	2.54952	0.00519112	0.942563	1	9606	5165	NULL	X	Xp22.11	pyruvate dehydrogenase kinase, isozyme 3	protein-coding	PDK3	pyruvate dehydrogenase kinase, isozyme 3	O	pyruvate dehydrogenase kinase, isoenzyme	PDK3	NO	#N/A
ENSG00000068001	-0.144296	6.31564	3.30421	0.0691027	1	9606	8692	NULL	3	3p21.3	hyaluronoglucosaminidase 2	protein-coding	HYAL2	hyaluronoglucosaminidase 2	O	PH-20 homolog|PH20 homolog|hyal-2|hyalur	HYAL2	NO	#N/A
ENSG00000068024	-0.772721	4.87996	71.3596	2.97702e-17	3.98414e-13	9606	9759	NULL	2	2q37.3	histone deacetylase 4	protein-coding	HDAC4	histone deacetylase 4	O	histone deacetylase A	HDAC4	NO	#N/A
ENSG00000068028	-0.266029	4.1579	5.64274	0.0175277	1	9606	11186	NULL	3	3p21.3	Ras association (RalGDS/AF-6) domain family member 1	protein-coding	RASSF1	Ras association (RalGDS/AF-6) domain family member 1	O	WUGSC:H_LUCA12.5|cardiac-specific ras as	RASSF1	NO	#N/A
ENSG00000068078	0.189759	1.60441	0.926613	0.335745	1	9606	2261	NULL	4	4p16.3	fibroblast growth factor receptor 3	protein-coding	FGFR3	fibroblast growth factor receptor 3	O	FGFR-3|fibroblast growth factor receptor	FGFR3	NO	#N/A
ENSG00000068079	0.551623	4.71069	32.2912	1.3271e-08	0.000163579	9606	3430	NULL	17	17q21	interferon-induced protein 35	protein-coding	IFI35	interferon-induced protein 35	O	IFP 35|ifi-35|interferon-induced 35 kDa	IFI35	NO	#N/A
ENSG00000068097	0.380387	5.88262	19.5475	9.81315e-06	0.109809	9606	63897	NULL	17	17q23.1	HEAT repeat containing 6	protein-coding	HEATR6	HEAT repeat containing 6	O	HEAT repeat-containing protein 6|amplifi	HEATR6	NO	#N/A
ENSG00000068120	-0.274144	7.91654	11.3483	0.000755167	1	9606	80347	PSEC0106	17	17q12-q21	CoA synthase	protein-coding	COASY	CoA synthase	O	bifunctional coenzyme A synthase|bifunct	COASY	NO	#N/A
ENSG00000068137	-0.299491	5.00729	7.66367	0.00563437	1	9606	79990	NULL	17	17q21.2	pleckstrin homology domain containing, family H (with MyTH4 domain) member 3	protein-coding	PLEKHH3	pleckstrin homology domain containing, family H (with MyTH4 domain) member 3	O	PH domain-containing family H member 3|p	PLEKHH3	NO	#N/A
ENSG00000068305	0.158079	7.63006	2.93292	0.0867904	1	9606	4205	NULL	15	15q26	myocyte enhancer factor 2A	protein-coding	MEF2A	myocyte enhancer factor 2A	O	MADS box transcription enhancer factor 2	MEF2A	NO	#N/A
ENSG00000068308	-0.100978	6.1578	1.90957	0.167011	1	9606	55593	NULL	X	Xp11.23	OTU domain containing 5	protein-coding	OTUD5	OTU domain containing 5	O	OTU domain-containing protein 5|deubiqui	OTUD5	NO	#N/A
ENSG00000068323	-0.134443	7.01358	2.53046	0.111668	1	9606	7030	NULL	X	Xp11.22	transcription factor binding to IGHM enhancer 3	protein-coding	TFE3	transcription factor binding to IGHM enhancer 3	O	Transcription factor for IgH enhancer|cl	TFE3	NO	#N/A
ENSG00000068354	-0.0260913	4.46742	0.0630725	0.801704	1	9606	4943	NULL	X	Xp11.23	TBC1 domain family, member 25	protein-coding	TBC1D25	TBC1 domain family, member 25	O	5SN3 snoRNA|TBC1 domain family member 25	TBC1D25	NO	#N/A
ENSG00000068366	-0.00658721	6.98599	0.00449068	0.946572	1	9606	2182	NULL	X	Xq22.3-q23	acyl-CoA synthetase long-chain family member 4	protein-coding	ACSL4	acyl-CoA synthetase long-chain family member 4	O	LACS 4|acyl-CoA synthetase 4|fatty-acid-	ACSL4	NO	#N/A
ENSG00000068383	-1.67726	4.24942	232.824	1.44403e-52	2.00373e-48	9606	3632	RP11-288G11.1	10	10q26.3	inositol polyphosphate-5-phosphatase, 40kDa	protein-coding	INPP5A	inositol polyphosphate-5-phosphatase, 40kDa	O	43 kDa inositol polyphosphate 5-phophata	INPP5A	DOWN	INPP5A
ENSG00000068394	-0.353369	4.3952	9.7603	0.00178321	1	9606	27238	NULL	X	Xp11.23	G patch domain and KOW motifs	protein-coding	GPKOW	G patch domain and KOW motifs	O	G patch domain and KOW motifs-containing	GPKOW	NO	#N/A
ENSG00000068400	0.18825	5.30918	3.26766	0.0706585	1	9606	56850	NULL	X	Xp11	GRIP1 associated protein 1	protein-coding	GRIPAP1	GRIP1 associated protein 1	O	GRIP1-associated protein 1|MPMGp800B1249	GRIPAP1	NO	#N/A
ENSG00000068438	0.0496135	6.06691	0.352107	0.552923	1	9606	24140	JM23	X	Xp11.23	FtsJ RNA methyltransferase homolog 1 (E. coli)	protein-coding	FTSJ1	FtsJ RNA methyltransferase homolog 1 (E. coli)	O	2'-O-ribose RNA methyltransferase TRM7 h	FTSJ1	NO	#N/A
ENSG00000068489	-0.0537249	7.25425	0.326341	0.567822	1	9606	55771	NULL	17	17q22	proline rich 11	protein-coding	PRR11	proline rich 11	O	proline-rich protein 11|transcription re	PRR11	NO	#N/A
ENSG00000068650	-0.586202	5.36936	28.1413	1.12772e-07	0.00135811	9606	23250	RP11-120K24.1	13	13q34	ATPase, class VI, type 11A	protein-coding	ATP11A	ATPase, class VI, type 11A	O	phospholipid-translocating ATPase|potent	ATP11A	NO	#N/A
ENSG00000068654	-0.28469	6.85213	10.1696	0.00142777	1	9606	25885	NULL	2	2p11.2	polymerase (RNA) I polypeptide A, 194kDa	protein-coding	POLR1A	polymerase (RNA) I polypeptide A, 194kDa	O	DNA-directed RNA polymerase I largest su	POLR1A	NO	#N/A
ENSG00000068697	0.064795	7.09461	0.751665	0.38595	1	9606	9741	UNQ1846/PRO3574	2	2p24.1	lysosomal protein transmembrane 4 alpha	protein-coding	LAPTM4A	lysosomal protein transmembrane 4 alpha	O	golgi 4-transmembrane-spanning transport	LAPTM4A	NO	#N/A
ENSG00000068724	-0.340169	4.16039	11.4022	0.000733589	1	9606	57217	NULL	2	2p21	tetratricopeptide repeat domain 7A	protein-coding	TTC7A	tetratricopeptide repeat domain 7A	O	TPR repeat protein 7A|tetratricopeptide	TTC7A	NO	#N/A
ENSG00000068745	-0.0665474	5.66164	0.62452	0.429373	1	9606	51447	TCCCIA00113	3	3p21.31	inositol hexakisphosphate kinase 2	protein-coding	IP6K2	inositol hexakisphosphate kinase 2	O	ATP:1D-myo-inositol-hexakisphosphate pho	IP6K2	NO	#N/A
ENSG00000068784	0.672556	4.63109	48.4855	3.32733e-12	4.31787e-08	9606	55133	NULL	2	2p21	S1 RNA binding domain 1	protein-coding	SRBD1	S1 RNA binding domain 1	O	H_NH0576F01.1|S1 RNA-binding domain-cont	SRBD1	NO	#N/A
ENSG00000068796	-0.171087	6.35492	3.18522	0.0743071	1	9606	3796	NULL	5	5q12-q13	kinesin heavy chain member 2A	protein-coding	KIF2A	kinesin heavy chain member 2A	O	Kinesin, heavy chain, 2|kinesin-2|kinesi	KIF2A	NO	#N/A
ENSG00000068878	-0.195939	6.71339	3.31758	0.0685425	1	9606	23198	NULL	2	2p16.2	proteasome (prosome, macropain) activator subunit 4	protein-coding	PSME4	proteasome (prosome, macropain) activator subunit 4	O	proteasome activator 200 kDa|proteasome	PSME4	NO	#N/A
ENSG00000068885	0.114652	4.94758	1.42692	0.232267	1	9606	57560	NULL	3	3q25.33	intraflagellar transport 80 homolog (Chlamydomonas)	protein-coding	IFT80	intraflagellar transport 80 homolog (Chlamydomonas)	O	WD repeat domain 56|WD repeat-containing	IFT80	NO	#N/A
ENSG00000068903	0.114526	4.87727	1.31996	0.250598	1	9606	22933	NULL	19	19q13	sirtuin 2	protein-coding	SIRT2	sirtuin 2	O	NAD-dependent deacetylase sirtuin-2|NAD-	SIRT2	NO	#N/A
ENSG00000068912	0.161985	6.22311	5.04989	0.0246275	1	9606	27248	UNQ1878/PRO4321	2	2p16.2	endoplasmic reticulum lectin 1	protein-coding	ERLEC1	endoplasmic reticulum lectin 1	O	ER lectin|XTP3-transactivated gene B pro	ERLEC1	NO	#N/A
ENSG00000068971	-0.300779	3.71332	6.40269	0.0113947	1	9606	5526	NULL	11	11q12	protein phosphatase 2, regulatory subunit B', beta	protein-coding	PPP2R5B	protein phosphatase 2, regulatory subunit B', beta	O	PP2A B subunit isoform B'-beta|PP2A B su	PPP2R5B	NO	#N/A
ENSG00000069020	-0.289102	4.15747	5.63625	0.0175928	1	9606	375449	NULL	5	5q12.3	microtubule associated serine/threonine kinase family member 4	protein-coding	MAST4	microtubule associated serine/threonine kinase family member 4	O	microtubule-associated serine/threonine-	MAST4	NO	#N/A
ENSG00000069188	-0.361545	1.16826	2.77386	0.0958148	1	9606	54549	NULL	17	17q25.1	sidekick cell adhesion molecule 2	protein-coding	SDK2	sidekick cell adhesion molecule 2	O	protein sidekick-2|sidekick homolog 2	SDK2	NO	#N/A
ENSG00000069248	-0.0752396	6.79487	1.03047	0.310048	1	9606	55746	RP5-1068B5.4	1	1q42.13	nucleoporin 133kDa	protein-coding	NUP133	nucleoporin 133kDa	O	133 kDa nucleoporin|nuclear pore complex	NUP133	NO	#N/A
ENSG00000069275	-0.45068	8.87753	24.5565	7.21609e-07	0.00847962	9606	64710	JC7	1	1q32.1	nuclear casein kinase and cyclin-dependent kinase substrate 1	protein-coding	NUCKS1	nuclear casein kinase and cyclin-dependent kinase substrate 1	O	P1|nuclear ubiquitous casein and cyclin-	NUCKS1	NO	#N/A
ENSG00000069329	0.0850395	7.52956	1.36583	0.242529	1	9606	55737	TCCCTA00141	16	16q12	vacuolar protein sorting 35 homolog (S. cerevisiae)	protein-coding	VPS35	vacuolar protein sorting 35 homolog (S. cerevisiae)	O	hVPS35|maternal-embryonic 3|vacuolar pro	VPS35	NO	#N/A
ENSG00000069345	-0.15104	6.64062	4.15777	0.0414438	1	9606	10294	NULL	16	16q12.1	DnaJ (Hsp40) homolog, subfamily A, member 2	protein-coding	DNAJA2	DnaJ (Hsp40) homolog, subfamily A, member 2	O	HIRA interacting protein 4|HIRA-interact	DNAJA2	NO	#N/A
ENSG00000069399	0.0422725	2.93459	0.0989858	0.75305	1	9606	602	NULL	19	19q13.1-q13.2	B-cell CLL/lymphoma 3	protein-coding	BCL3	B-cell CLL/lymphoma 3	O	B-cell leukemia/lymphoma 3|B-cell lympho	BCL3	NO	#N/A
ENSG00000069424	-1.15897	2.9353	69.8282	6.47023e-17	8.64746e-13	9606	8514	RP1-233K16.1	1	1p36.3	potassium voltage-gated channel, shaker-related subfamily, beta member 2	protein-coding	KCNAB2	potassium voltage-gated channel, shaker-related subfamily, beta member 2	O	K(+) channel subunit beta-2|K+ channel b	KCNAB2	DOWN	KCNAB2
ENSG00000069431	0.32886	3.77422	7.9616	0.00477803	1	9606	10060	NULL	12	12p12.1	ATP-binding cassette, sub-family C (CFTR/MRP), member 9	protein-coding	ABCC9	ATP-binding cassette, sub-family C (CFTR/MRP), member 9	O	ATP-binding cassette sub-family C member	ABCC9	NO	#N/A
ENSG00000069493	0.489372	1.56018	6.43955	0.0111607	1	9606	29121	NULL	12	12p13	C-type lectin domain family 2, member D	protein-coding	CLEC2D	C-type lectin domain family 2, member D	O	C-type lectin domain family 2 member D|C	CLEC2D	NO	#N/A
ENSG00000069509	0.108329	4.4854	1.12866	0.288061	1	9606	139341	RP4-551E13.3	X	Xp11.3	FUN14 domain containing 1	protein-coding	FUNDC1	FUN14 domain containing 1	O	FUN14 domain-containing protein 1	FUNDC1	NO	#N/A
ENSG00000069667	0.415996	2.9085	8.89141	0.00286515	1	9606	6095	NULL	15	15q22.2	RAR-related orphan receptor A	protein-coding	RORA	RAR-related orphan receptor A	O	ROR-alpha|nuclear receptor ROR-alpha|nuc	RORA	NO	#N/A
ENSG00000069702	-0.0297175	3.37628	0.0642641	0.799879	1	9606	7049	NULL	1	1p33-p32	transforming growth factor, beta receptor III	protein-coding	TGFBR3	transforming growth factor, beta receptor III	O	TGF-beta receptor type 3|TGF-beta recept	TGFBR3	NO	#N/A
ENSG00000069712	0.890308	0.971905	14.5726	0.00013486	1	9606	23285	NULL	1	1p22.1	KIAA1107	protein-coding	KIAA1107	KIAA1107	O	uncharacterized protein KIAA1107	KIAA1107	NO	#N/A
ENSG00000069849	-0.118115	7.27841	3.0452	0.0809763	1	9606	483	NULL	3	3q23	ATPase, Na+/K+ transporting, beta 3 polypeptide	protein-coding	ATP1B3	ATPase, Na+/K+ transporting, beta 3 polypeptide	O	Na, K-ATPase beta-3 polypeptide|sodium p	ATP1B3	NO	#N/A
ENSG00000069869	-0.0620866	5.68477	0.267261	0.605175	1	9606	4734	PIG53	15	15q	neural precursor cell expressed, developmentally down-regulated 4, E3 ubiquitin protein ligase	protein-coding	NEDD4	neural precursor cell expressed, developmentally down-regulated 4, E3 ubiquitin protein ligase	O	E3 ubiquitin-protein ligase NEDD4|NEDD-4	NEDD4	NO	#N/A
ENSG00000069943	0.169643	3.58497	1.85193	0.17356	1	9606	9488	NULL	15	15q21.3	phosphatidylinositol glycan anchor biosynthesis, class B	protein-coding	PIGB	phosphatidylinositol glycan anchor biosynthesis, class B	O	GPI mannosyltransferase 3|GPI mannosyltr	PIGB	NO	#N/A
ENSG00000069956	-0.1605	6.42612	2.72846	0.0985744	1	9606	5597	NULL	15	15q21	mitogen-activated protein kinase 6	protein-coding	MAPK6	mitogen-activated protein kinase 6	O	ERK-3|MAP kinase 6|MAP kinase isoform p9	MAPK6	NO	#N/A
ENSG00000069966	-0.0872976	4.58839	0.893843	0.344438	1	9606	10681	NULL	15	15q21.2	guanine nucleotide binding protein (G protein), beta 5	protein-coding	GNB5	guanine nucleotide binding protein (G protein), beta 5	O	G protein, beta subunit 5L|G protein, be	GNB5	NO	#N/A
ENSG00000069974	0.101812	4.28093	0.943	0.331508	1	9606	5873	NULL	15	15q15-q21.1	RAB27A, member RAS oncogene family	protein-coding	RAB27A	RAB27A, member RAS oncogene family	O	GTP-binding protein Ram|rab-27|ras-relat	RAB27A	NO	#N/A
ENSG00000069998	-0.501289	5.27816	21.993	2.7364e-06	0.031444	9606	27440	NULL	22	NULL	cat eye syndrome chromosome region, candidate 5	protein-coding	CECR5	cat eye syndrome chromosome region, candidate 5	O	cat eye syndrome critical region protein	CECR5	NO	#N/A
ENSG00000070010	-0.0979697	5.90035	1.46112	0.226752	1	9606	7353	NULL	22	22q11.21	ubiquitin fusion degradation 1 like (yeast)	protein-coding	UFD1L	ubiquitin fusion degradation 1 like (yeast)	O	UB fusion protein 1|ubiquitin fusion deg	UFD1L	NO	#N/A
ENSG00000070018	0.11259	6.42216	1.22782	0.267832	1	9606	4040	NULL	12	12p13.2	low density lipoprotein receptor-related protein 6	protein-coding	LRP6	low density lipoprotein receptor-related protein 6	O	LRP-6|low-density lipoprotein receptor-r	LRP6	NO	#N/A
ENSG00000070047	-0.868118	6.81054	75.2788	4.08735e-18	5.49094e-14	9606	57661	NULL	11	11p15.5	PHD and ring finger domains 1	protein-coding	PHRF1	PHD and ring finger domains 1	O	CTD binding SR like protein rA9|CTD-bind	PHRF1	NO	#N/A
ENSG00000070061	0.0032265	7.02228	0.00175247	0.966608	1	9606	8518	RP11-3J11.4	9	9q31	inhibitor of kappa light polypeptide gene enhancer in B-cells, kinase complex-associated protein	protein-coding	IKBKAP	inhibitor of kappa light polypeptide gene enhancer in B-cells, kinase complex-associated protein	O	IKK complex-associated protein|elongator	IKBKAP	NO	#N/A
ENSG00000070081	0.0985144	5.44105	1.03637	0.308668	1	9606	4925	NULL	11	11p15.1	nucleobindin 2	protein-coding	NUCB2	nucleobindin 2	O	DNA-binding protein NEFA|gastric cancer	NUCB2	NO	#N/A
ENSG00000070087	0.26573	7.79871	17.7333	2.54141e-05	0.277802	9606	5217	NULL	3	3q25.1	profilin 2	protein-coding	PFN2	profilin 2	O	profilin II|profilin-2	PFN2	NO	#N/A
ENSG00000070159	-0.0839539	5.47233	0.605553	0.436467	1	9606	5774	RP11-18A3.3	9	9q31	protein tyrosine phosphatase, non-receptor type 3	protein-coding	PTPN3	protein tyrosine phosphatase, non-receptor type 3	O	cytoskeletal-associated protein tyrosine	PTPN3	NO	#N/A
ENSG00000070182	0.530419	0.323604	3.40125	0.0651472	1	9606	6710	NULL	14	14q23-q24.2	spectrin, beta, erythrocytic	protein-coding	SPTB	spectrin, beta, erythrocytic	O	beta-I spectrin|membrane cytoskeletal pr	SPTB	NO	#N/A
ENSG00000070214	0.183103	6.86497	5.02938	0.0249208	1	9606	23446	NULL	9	9q31.2	solute carrier family 44, member 1	protein-coding	SLC44A1	solute carrier family 44, member 1	O	CDW92 antigen|choline transporter-like p	SLC44A1	NO	#N/A
ENSG00000070269	0.262245	2.8903	3.12631	0.077038	1	9606	54916	NULL	14	14q22.3	transmembrane protein 260	protein-coding	TMEM260	transmembrane protein 260	O	UPF0679 protein C14orf101	TMEM260	NO	#N/A
ENSG00000070366	-0.497278	4.06078	21.0419	4.49339e-06	0.0511977	9606	23293	NULL	17	17p13.3	smg-6 homolog, nonsense mediated mRNA decay factor (C. elegans)	protein-coding	SMG6	smg-6 homolog, nonsense mediated mRNA decay factor (C. elegans)	O	EST1 telomerase component homolog A|EST1	SMG6	NO	#N/A
ENSG00000070367	0.0307806	6.14809	0.107827	0.742631	1	9606	10640	NULL	14	14q22.3	exocyst complex component 5	protein-coding	EXOC5	exocyst complex component 5	O	SEC10-like 1|exocyst complex component S	EXOC5	NO	#N/A
ENSG00000070371	0.382776	3.49563	10.5204	0.00118067	1	9606	8218	NULL	22	22q11.21	clathrin, heavy chain-like 1	protein-coding	CLTCL1	clathrin, heavy chain-like 1	O	CLH-22|Clathrin, heavy polypeptide D|cla	CLTCL1	NO	#N/A
ENSG00000070388	4.62417	1.02998	170.429	5.96413e-39	8.24005e-35	9606	27006	UNQ2500/PRO5800	19	19p13.3	fibroblast growth factor 22	protein-coding	FGF22	fibroblast growth factor 22	O	FGF-22	FGF22	UP	FGF22
ENSG00000070404	0.765689	4.37198	30.4064	3.50379e-08	0.000427532	9606	10272	UNQ674/PRO1308	19	19p13	follistatin-like 3 (secreted glycoprotein)	protein-coding	FSTL3	follistatin-like 3 (secreted glycoprotein)	O	follistatin-like protein 3|follistatin-r	FSTL3	NO	#N/A
ENSG00000070413	-0.724607	5.3325	70.3026	5.08702e-17	6.80185e-13	9606	9993	NULL	22	22q11.21	DiGeorge syndrome critical region gene 2	protein-coding	DGCR2	DiGeorge syndrome critical region gene 2	O	DiGeorge syndrome critical region protei	DGCR2	NO	#N/A
ENSG00000070423	-1.24731	5.68103	182.407	1.44506e-41	1.99838e-37	9606	55658	NULL	19	19p13.3	ring finger protein 126	protein-coding	RNF126	ring finger protein 126	O	RING finger protein 126	RNF126	DOWN	RNF126
ENSG00000070444	-0.157099	4.55374	2.01586	0.155663	1	9606	4335	NULL	17	17p13.3	MNT, MAX dimerization protein	protein-coding	MNT	MNT, MAX dimerization protein	O	MAX binding protein|Max-interacting prot	MNT	NO	#N/A
ENSG00000070476	0.141222	5.10265	1.49172	0.22195	1	9606	79364	UNQ2790	3	3q21.3	ZXD family zinc finger C	protein-coding	ZXDC	ZXD family zinc finger C	O	SERH2790|ZXD-like zinc finger protein|zi	ZXDC	NO	#N/A
ENSG00000070495	-0.338733	6.42952	16.1382	5.88856e-05	0.629075	9606	23210	NULL	17	17q25	jumonji domain containing 6	protein-coding	JMJD6	jumonji domain containing 6	O	bifunctional arginine demethylase and ly	JMJD6	NO	#N/A
ENSG00000070501	0.336882	3.73961	9.00577	0.00269128	1	9606	5423	NULL	8	8p11.2	polymerase (DNA directed), beta	protein-coding	POLB	polymerase (DNA directed), beta	O	DNA pol beta|DNA polymerase beta|DNA pol	POLB	NO	#N/A
ENSG00000070540	0.700472	4.96405	57.6737	3.09409e-14	4.07709e-10	9606	55062	NULL	17	17q24.2	WD repeat domain, phosphoinositide interacting 1	protein-coding	WIPI1	WD repeat domain, phosphoinositide interacting 1	O	WD repeat domain phosphoinositide-intera	WIPI1	NO	#N/A
ENSG00000070610	-0.088071	5.26186	0.832977	0.361413	1	9606	57704	AD035	9	9p13.3	glucosidase, beta (bile acid) 2	protein-coding	GBA2	glucosidase, beta (bile acid) 2	O	NLGase|beta-glucocerebrosidase 2|beta-gl	GBA2	NO	#N/A
ENSG00000070614	-0.204167	7.12718	7.1128	0.00765353	1	9606	3340	NULL	5	5q33.1	N-deacetylase/N-sulfotransferase (heparan glucosaminyl) 1	protein-coding	NDST1	N-deacetylase/N-sulfotransferase (heparan glucosaminyl) 1	O	HSNST 1|N-HSST 1|N-heparan sulfate sulfo	NDST1	NO	#N/A
ENSG00000070669	-0.568223	4.94659	22.5655	2.03103e-06	0.0234706	9606	440	NULL	7	7q21.3	asparagine synthetase (glutamine-hydrolyzing)	protein-coding	ASNS	asparagine synthetase (glutamine-hydrolyzing)	O	TS11 cell cycle control protein|asparagi	ASNS	NO	#N/A
ENSG00000070718	0.310037	4.95582	12.2744	0.000459226	1	9606	10947	NULL	8	8p11.2	adaptor-related protein complex 3, mu 2 subunit	protein-coding	AP3M2	adaptor-related protein complex 3, mu 2 subunit	O	AP-3 complex subunit mu-2|HA1 47 kDa sub	AP3M2	NO	#N/A
ENSG00000070756	-0.548257	9.16215	50.6827	1.08572e-12	1.41481e-08	9606	26986	NULL	8	8q22.2-q23	poly(A) binding protein, cytoplasmic 1	protein-coding	PABPC1	poly(A) binding protein, cytoplasmic 1	O	poly(A) binding protein, cytoplasmic 2|p	PABPC1	NO	#N/A
ENSG00000070759	0.737384	1.85169	16.8503	4.04461e-05	0.436656	9606	10420	NULL	1	1p32	testis-specific kinase 2	protein-coding	TESK2	testis-specific kinase 2	O	dual specificity testis-specific protein	TESK2	NO	#N/A
ENSG00000070761	-0.0683912	5.02435	0.555177	0.45621	1	#N/A	#N/A	#N/A	#N/A	#N/A	#N/A	#N/A	#N/A	#N/A	#N/A	#N/A	CFAP20	NO	#N/A
ENSG00000070770	-0.170788	6.19693	4.88295	0.0271231	1	9606	1459	NULL	16	16q21	casein kinase 2, alpha prime polypeptide	protein-coding	CSNK2A2	casein kinase 2, alpha prime polypeptide	O	CK II alpha'|casein kinase II subunit al	CSNK2A2	NO	#N/A
ENSG00000070778	-0.0293692	4.07061	0.0820169	0.774583	1	9606	11099	NULL	14	14q31.3	protein tyrosine phosphatase, non-receptor type 21	protein-coding	PTPN21	protein tyrosine phosphatase, non-receptor type 21	O	dJ1175B15.2 (protein tyrosine phosphatas	PTPN21	NO	#N/A
ENSG00000070785	-0.0303748	4.66095	0.108999	0.741287	1	9606	8891	RP5-882O7.2	1	1p34.1	eukaryotic translation initiation factor 2B, subunit 3 gamma, 58kDa	protein-coding	EIF2B3	eukaryotic translation initiation factor 2B, subunit 3 gamma, 58kDa	O	eIF-2B GDP-GTP exchange factor subunit g	EIF2B3	NO	#N/A
ENSG00000070808	0.281859	1.08262	1.64454	0.199703	1	9606	815	NULL	5	5q32	calcium/calmodulin-dependent protein kinase II alpha	protein-coding	CAMK2A	calcium/calmodulin-dependent protein kinase II alpha	O	CaM kinase II alpha subunit|CaM-kinase I	CAMK2A	NO	#N/A
ENSG00000070814	-0.365181	8.40413	26.3162	2.89844e-07	0.00344973	9606	6949	NULL	5	5q32	Treacher Collins-Franceschetti syndrome 1	protein-coding	TCOF1	Treacher Collins-Franceschetti syndrome 1	O	Treacher Collins syndrome protein|nucleo	TCOF1	NO	#N/A
ENSG00000070831	-0.0296414	7.67559	0.226595	0.63406	1	9606	998	RP1-224A6.5	1	1p36.1	cell division cycle 42	protein-coding	CDC42	cell division cycle 42	O	G25K GTP-binding protein|GTP binding pro	CDC42	NO	#N/A
ENSG00000070882	0.223992	6.17661	8.68196	0.00321376	1	9606	26031	NULL	7	7p15	oxysterol binding protein-like 3	protein-coding	OSBPL3	oxysterol binding protein-like 3	O	OSBP-related protein 3|oxysterol-binding	OSBPL3	NO	#N/A
ENSG00000070950	0.300165	6.4447	11.5846	0.000665007	1	9606	56852	NULL	3	3p25-p24	RAD18 homolog (S. cerevisiae)	protein-coding	RAD18	RAD18 homolog (S. cerevisiae)	O	E3 ubiquitin-protein ligase RAD18|RAD18,	RAD18	NO	#N/A
ENSG00000070961	-0.264589	9.37057	7.46906	0.00627685	1	9606	490	NULL	12	12q21.3	ATPase, Ca++ transporting, plasma membrane 1	protein-coding	ATP2B1	ATPase, Ca++ transporting, plasma membrane 1	O	plasma membrane calcium pump|plasma memb	ATP2B1	NO	#N/A
ENSG00000071051	-0.256429	5.24823	7.20038	0.0072888	1	9606	8440	NULL	2	2q12	NCK adaptor protein 2	protein-coding	NCK2	NCK adaptor protein 2	O	SH2/SH3 adaptor protein NCK-beta|cytopla	NCK2	NO	#N/A
ENSG00000071054	-0.964946	8.73202	195.205	2.32405e-44	3.21811e-40	9606	9448	NULL	2	2q11.2-q12	mitogen-activated protein kinase kinase kinase kinase 4	protein-coding	MAP4K4	mitogen-activated protein kinase kinase kinase kinase 4	O	HPK/GCK-like kinase HGK|MAPK/ERK kinase	MAP4K4	NO	#N/A
ENSG00000071082	-0.0711512	8.87206	0.708019	0.400102	1	9606	6160	NULL	2	2q11.2	ribosomal protein L31	protein-coding	RPL31	ribosomal protein L31	O	60S ribosomal protein L31	RPL31	NO	#N/A
ENSG00000071127	-0.283698	8.99818	18.8204	1.43621e-05	0.159448	9606	9948	NULL	4	4p16.1	WD repeat domain 1	protein-coding	WDR1	WD repeat domain 1	O	WD repeat-containing protein 1|actin-int	WDR1	NO	#N/A
ENSG00000071189	0.131439	6.27823	2.31532	0.128105	1	9606	23161	NULL	7	7p21.1	sorting nexin 13	protein-coding	SNX13	sorting nexin 13	O	rgs domain- and phox domain-containing p	SNX13	NO	#N/A
ENSG00000071205	0.169942	5.20894	3.63986	0.0564118	1	9606	79658	NULL	4	4q31.23	Rho GTPase activating protein 10	protein-coding	ARHGAP10	Rho GTPase activating protein 10	O	GTPase regulator associated with focal a	ARHGAP10	NO	#N/A
ENSG00000071242	-0.0344932	7.76768	0.238178	0.625525	1	9606	6196	RP1-168L15.2	6	6q27	ribosomal protein S6 kinase, 90kDa, polypeptide 2	protein-coding	RPS6KA2	ribosomal protein S6 kinase, 90kDa, polypeptide 2	O	90 kDa ribosomal protein S6 kinase 2|MAP	RPS6KA2	NO	#N/A
ENSG00000071243	0.170944	4.2896	2.71828	0.0992046	1	9606	54556	HSPC301	7	7q31	inhibitor of growth family, member 3	protein-coding	ING3	inhibitor of growth family, member 3	O	inhibitor of growth protein 3	ING3	NO	#N/A
ENSG00000071246	-0.291548	2.50909	3.72706	0.0535376	1	9606	22846	NULL	14	14q24.3	vasohibin 1	protein-coding	VASH1	vasohibin 1	O	vasohibin-1	VASH1	NO	#N/A
ENSG00000071282	0.538001	1.43913	6.96839	0.00829621	1	9606	29995	NULL	3	3p26-p24	LIM and cysteine-rich domains 1	protein-coding	LMCD1	LIM and cysteine-rich domains 1	O	LIM and cysteine-rich domains protein 1|	LMCD1	NO	#N/A
ENSG00000071462	-0.133724	6.72476	3.04473	0.0809998	1	9606	114049	HUSSY-03	7	NULL	Williams Beuren syndrome chromosome region 22	protein-coding	WBSCR22	Williams Beuren syndrome chromosome region 22	O	Williams-Beuren candidate region putativ	WBSCR22	NO	#N/A
ENSG00000071537	-0.060505	6.09565	0.413265	0.520317	1	9606	6400	UNQ128/PRO1063	14	14q31	sel-1 suppressor of lin-12-like (C. elegans)	protein-coding	SEL1L	sel-1 suppressor of lin-12-like (C. elegans)	O	Suppressor of lin 12 (sel-1), C. elegans	SEL1L	NO	#N/A
ENSG00000071539	0.0625186	6.50738	0.40971	0.522117	1	9606	9319	NULL	5	5p15.33	thyroid hormone receptor interactor 13	protein-coding	TRIP13	thyroid hormone receptor interactor 13	O	16E1-BP|HPV16 E1 protein binding protein	TRIP13	NO	#N/A
ENSG00000071553	-0.071614	6.42749	0.777818	0.377809	1	9606	537	XX-FW83563B9.4	X	Xq28	ATPase, H+ transporting, lysosomal accessory protein 1	protein-coding	ATP6AP1	ATPase, H+ transporting, lysosomal accessory protein 1	O	ATPase, H+ transporting, lysosomal (vacu	ATP6AP1	NO	#N/A
ENSG00000071564	-0.413293	6.68754	25.5377	4.33827e-07	0.00513304	9606	6929	NULL	19	19p13.3	transcription factor 3	protein-coding	TCF3	transcription factor 3	O	VDR interacting repressor|class B basic	TCF3	NO	#N/A
ENSG00000071575	-0.31013	4.60746	10.6112	0.00112406	1	9606	28951	NULL	2	2p24.3	tribbles homolog 2 (Drosophila)	protein-coding	TRIB2	tribbles homolog 2 (Drosophila)	O	tribbles homolog 2	TRIB2	NO	#N/A
ENSG00000071626	-0.518606	7.67848	35.4972	2.55419e-09	3.19324e-05	9606	26528	NULL	19	19p13.3	DAZ associated protein 1	protein-coding	DAZAP1	DAZ associated protein 1	O	DAZ-associated protein 1|deleted in azoo	DAZAP1	NO	#N/A
ENSG00000071655	-0.0686319	7.60668	0.691652	0.405603	1	9606	53615	NULL	19	19p13.3	methyl-CpG binding domain protein 3	protein-coding	MBD3	methyl-CpG binding domain protein 3	O	methyl-CpG-binding domain protein 3	MBD3	NO	#N/A
ENSG00000071794	0.203862	6.84043	5.58909	0.0180727	1	9606	6596	NULL	3	3q25.1-q26.1	helicase-like transcription factor	protein-coding	HLTF	helicase-like transcription factor	O	DNA-binding protein/plasminogen activato	HLTF	NO	#N/A
ENSG00000071859	-0.135871	5.7885	1.97038	0.160408	1	9606	9130	XX-FW81657B9.2	X	Xq28	family with sequence similarity 50, member A	protein-coding	FAM50A	family with sequence similarity 50, member A	O	protein FAM50A|protein XAP-5	FAM50A	NO	#N/A
ENSG00000071889	-0.0670358	4.77419	0.597857	0.439397	1	9606	60343	XX-FW89031B12.3	X	Xq28	family with sequence similarity 3, member A	protein-coding	FAM3A	family with sequence similarity 3, member A	O	cytokine-like protein 2-19|protein FAM3A	FAM3A	NO	#N/A
ENSG00000071894	-0.434559	7.03551	28.6994	8.45292e-08	0.00102137	9606	29894	NULL	8	8q24.23	cleavage and polyadenylation specific factor 1, 160kDa	protein-coding	CPSF1	cleavage and polyadenylation specific factor 1, 160kDa	O	CPSF 160 kDa subunit|cleavage and polyad	CPSF1	NO	#N/A
ENSG00000071967	0.542659	6.24934	29.8936	4.5641e-08	0.000555725	9606	79901	NULL	2	2q31.1	cytochrome b reductase 1	protein-coding	CYBRD1	cytochrome b reductase 1	O	cytochrome b561 family, member A2|duoden	CYBRD1	NO	#N/A
ENSG00000071994	0.207422	6.75052	6.15057	0.013137	1	9606	5134	RP1-191N21.2	6	6q27	programmed cell death 2	protein-coding	PDCD2	programmed cell death 2	O	programmed cell death protein 2|zinc fin	PDCD2	NO	#N/A
ENSG00000072041	0.473526	6.24821	34.6056	4.03749e-09	5.03071e-05	9606	55117	NULL	12	12q21.3	solute carrier family 6 (neutral amino acid transporter), member 15	protein-coding	SLC6A15	solute carrier family 6 (neutral amino acid transporter), member 15	O	homolog of rat orphan transporter v7-3|o	SLC6A15	NO	#N/A
ENSG00000072042	-0.215967	5.08408	5.82073	0.0158384	1	9606	51109	CGI-82	14	14q24.1	retinol dehydrogenase 11 (all-trans/9-cis/11-cis)	protein-coding	RDH11	retinol dehydrogenase 11 (all-trans/9-cis/11-cis)	O	HCV core-binding protein HCBP12|androgen	RDH11	NO	#N/A
ENSG00000072062	-0.308476	6.39652	15.8038	7.02603e-05	0.747008	9606	5566	NULL	19	19p13.1	protein kinase, cAMP-dependent, catalytic, alpha	protein-coding	PRKACA	protein kinase, cAMP-dependent, catalytic, alpha	O	PKA C-alpha|cAMP-dependent protein kinas	PRKACA	NO	#N/A
ENSG00000072071	-0.105947	5.00552	1.21574	0.270198	1	#N/A	#N/A	#N/A	#N/A	#N/A	#N/A	#N/A	#N/A	#N/A	#N/A	#N/A	ADGRL1	NO	#N/A
ENSG00000072110	-0.184839	7.57946	7.08802	0.0077601	1	9606	87	NULL	14	14q24|14q22-q24	actinin, alpha 1	protein-coding	ACTN1	actinin, alpha 1	O	F-actin cross-linking protein|actinin 1	ACTN1	NO	#N/A
ENSG00000072121	-0.0328598	4.35481	0.0897097	0.764547	1	9606	23503	NULL	14	14q24.1	zinc finger, FYVE domain containing 26	protein-coding	ZFYVE26	zinc finger, FYVE domain containing 26	O	FYVE domain-containing centrosomal prote	ZFYVE26	NO	#N/A
ENSG00000072133	0.0742694	3.18189	0.371441	0.54222	1	9606	27330	NULL	X	Xq21	ribosomal protein S6 kinase, 90kDa, polypeptide 6	protein-coding	RPS6KA6	ribosomal protein S6 kinase, 90kDa, polypeptide 6	O	90 kDa ribosomal protein S6 kinase 6|RSK	RPS6KA6	NO	#N/A
ENSG00000072134	0.124071	2.93503	0.897209	0.343531	1	9606	22905	NULL	17	17p11.2	epsin 2	protein-coding	EPN2	epsin 2	O	EPS-15-interacting protein 2|Eps15 bindi	EPN2	NO	#N/A
ENSG00000072135	-0.252676	4.95311	5.71906	0.0167817	1	9606	26469	NULL	2	2q21.1	protein tyrosine phosphatase, non-receptor type 18 (brain-derived)	protein-coding	PTPN18	protein tyrosine phosphatase, non-receptor type 18 (brain-derived)	O	brain-derived phosphatase|tyrosine-prote	PTPN18	NO	#N/A
ENSG00000072163	-0.362657	4.82117	11.3497	0.000754592	1	9606	55679	NULL	2	2q14.3	LIM and senescent cell antigen-like domains 2	protein-coding	LIMS2	LIM and senescent cell antigen-like domains 2	O	ILK-binding protein|LIM and senescent ce	LIMS2	NO	#N/A
ENSG00000072195	-0.196281	6.09411	3.00886	0.0828106	1	9606	10290	NULL	2	2q35	SPEG complex locus	protein-coding	SPEG	SPEG complex locus	O	aortic preferentially expressed gene 1|a	SPEG	NO	#N/A
ENSG00000072201	-0.0317544	1.24669	0.0220952	0.881834	1	9606	84708	UNQ574/PRO1136	4	4q12	ligand of numb-protein X 1, E3 ubiquitin protein ligase	protein-coding	LNX1	ligand of numb-protein X 1, E3 ubiquitin protein ligase	O	E3 ubiquitin-protein ligase LNX|PDZ doma	LNX1	NO	#N/A
ENSG00000072210	-0.413178	4.93536	22.3335	2.29179e-06	0.0264335	9606	224	NULL	17	17p11.2	aldehyde dehydrogenase 3 family, member A2	protein-coding	ALDH3A2	aldehyde dehydrogenase 3 family, member A2	O	aldehyde dehydrogenase 10|aldehyde dehyd	ALDH3A2	NO	#N/A
ENSG00000072274	0.216007	9.28665	8.04928	0.00455217	1	9606	7037	NULL	3	3q29	transferrin receptor (p90, CD71)	protein-coding	TFRC	transferrin receptor (p90, CD71)	O	transferrin receptor protein 1	TFRC	NO	#N/A
ENSG00000072310	-0.606875	4.75539	30.5064	3.32771e-08	0.000406247	9606	6720	NULL	17	17p11.2	sterol regulatory element binding transcription factor 1	protein-coding	SREBF1	sterol regulatory element binding transcription factor 1	O	SREBP-1|class D basic helix-loop-helix p	SREBF1	NO	#N/A
ENSG00000072364	0.414511	7.08955	17.2736	3.23656e-05	0.351567	9606	27125	HSPC092	5	5q31	AF4/FMR2 family, member 4	protein-coding	AFF4	AF4/FMR2 family, member 4	O	AF4/FMR2 family member 4|ALL1-fused gene	AFF4	NO	#N/A
ENSG00000072401	0.0492081	4.92711	0.224713	0.635472	1	9606	7321	NULL	10	10q21.1	ubiquitin-conjugating enzyme E2D 1	protein-coding	UBE2D1	ubiquitin-conjugating enzyme E2D 1	O	UBC4/5 homolog|stimulator of Fe transpor	UBE2D1	NO	#N/A
ENSG00000072415	-0.0632304	4.78904	0.463064	0.496196	1	9606	64398	NULL	14	14q23.3	membrane protein, palmitoylated 5 (MAGUK p55 subfamily member 5)	protein-coding	MPP5	membrane protein, palmitoylated 5 (MAGUK p55 subfamily member 5)	O	MAGUK p55 subfamily member 5|protein ass	MPP5	NO	#N/A
ENSG00000072422	-0.2219	3.38433	2.63161	0.104755	1	9606	9886	NULL	10	10q21.2	Rho-related BTB domain containing 1	protein-coding	RHOBTB1	Rho-related BTB domain containing 1	O	rho-related BTB domain-containing protei	RHOBTB1	NO	#N/A
ENSG00000072501	0.165145	8.48337	5.20643	0.0225035	1	9606	8243	RP6-29D12.1	X	Xp11.22-p11.21	structural maintenance of chromosomes 1A	protein-coding	SMC1A	structural maintenance of chromosomes 1A	O	SMC protein 1A|SMC-1-alpha|SMC-1A|SMC1 (	SMC1A	NO	#N/A
ENSG00000072506	-0.267421	5.97965	7.15002	0.00749633	1	9606	3028	RP3-339A18.2	X	Xp11.2	hydroxysteroid (17-beta) dehydrogenase 10	protein-coding	HSD17B10	hydroxysteroid (17-beta) dehydrogenase 10	O	3-hydroxy-2-methylbutyryl-CoA dehydrogen	HSD17B10	NO	#N/A
ENSG00000072518	-0.541699	6.03049	54.2833	1.73568e-13	2.27495e-09	9606	2011	NULL	11	11q13.1	MAP/microtubule affinity-regulating kinase 2	protein-coding	MARK2	MAP/microtubule affinity-regulating kinase 2	O	ELKL motif kinase 1|PAR1 homolog b|Ser/T	MARK2	NO	#N/A
ENSG00000072571	-0.884861	5.95679	86.9933	1.08891e-20	1.47308e-16	9606	3161	NULL	5	5q33.2-qter	hyaluronan-mediated motility receptor (RHAMM)	protein-coding	HMMR	hyaluronan-mediated motility receptor (RHAMM)	O	hyaluronan mediated motility receptor|in	HMMR	NO	#N/A
ENSG00000072609	-0.292017	4.10566	7.00396	0.00813298	1	9606	55743	NULL	12	12q24.33	checkpoint with forkhead and ring finger domains, E3 ubiquitin protein ligase	protein-coding	CHFR	checkpoint with forkhead and ring finger domains, E3 ubiquitin protein ligase	O	E3 ubiquitin-protein ligase CHFR|RING fi	CHFR	NO	#N/A
ENSG00000072682	0.0591063	4.55236	0.347927	0.555289	1	9606	8974	UNQ290/PRO330	5	5q31	prolyl 4-hydroxylase, alpha polypeptide II	protein-coding	P4HA2	prolyl 4-hydroxylase, alpha polypeptide II	O	4-PH alpha 2|4-PH alpha-2|C-P4Halpha(II)	P4HA2	NO	#N/A
ENSG00000072736	-0.128527	5.57827	1.75432	0.185335	1	9606	4775	NULL	16	16q22.2	nuclear factor of activated T-cells, cytoplasmic, calcineurin-dependent 3	protein-coding	NFATC3	nuclear factor of activated T-cells, cytoplasmic, calcineurin-dependent 3	O	NF-ATc3|T cell transcription factor NFAT	NFATC3	NO	#N/A
ENSG00000072756	-0.0485457	5.14813	0.323525	0.569497	1	9606	51095	CGI-47	3	3p25.1	tRNA nucleotidyl transferase, CCA-adding, 1	protein-coding	TRNT1	tRNA nucleotidyl transferase, CCA-adding, 1	O	CCA tRNA nucleotidyltransferase 1, mitoc	TRNT1	NO	#N/A
ENSG00000072778	0.305846	7.1267	5.73458	0.0166341	1	9606	37	NULL	17	17p13.1	acyl-CoA dehydrogenase, very long chain	protein-coding	ACADVL	acyl-CoA dehydrogenase, very long chain	O	acyl-Coenzyme A dehydrogenase, very long	ACADVL	NO	#N/A
ENSG00000072786	-0.233101	6.42901	9.24616	0.0023599	1	9606	6793	NULL	5	5q35.1	serine/threonine kinase 10	protein-coding	STK10	serine/threonine kinase 10	O	lymphocyte-oriented kinase|serine/threon	STK10	NO	#N/A
ENSG00000072803	-0.0909991	6.94455	1.43693	0.230636	1	9606	23291	NULL	5	5q35.1	F-box and WD repeat domain containing 11	protein-coding	FBXW11	F-box and WD repeat domain containing 11	O	F-box and WD repeats protein beta-TrCP2|	FBXW11	NO	#N/A
ENSG00000072832	0.357923	3.582	9.98303	0.00157989	1	9606	1400	NULL	4	4p16.1	collapsin response mediator protein 1	protein-coding	CRMP1	collapsin response mediator protein 1	O	dihydropyrimidinase related protein-1|di	CRMP1	NO	#N/A
ENSG00000072840	-0.0649568	6.24665	0.358007	0.549615	1	9606	2121	NULL	4	4p16	Ellis van Creveld syndrome	protein-coding	EVC	Ellis van Creveld syndrome	O	ellis-van Creveld syndrome protein	EVC	NO	#N/A
ENSG00000072849	-0.385595	4.45613	12.4672	0.000414152	1	9606	51009	CGI-101	17	17p13.2	derlin 2	protein-coding	DERL2	derlin 2	O	DERtrin-2|Der1-like domain family, membe	DERL2	NO	#N/A
ENSG00000072858	1.28254	1.90203	43.8	3.63706e-11	4.66635e-07	9606	54847	NULL	3	3q13.2	SID1 transmembrane family, member 1	protein-coding	SIDT1	SID1 transmembrane family, member 1	O	SID1 transmembrane family member 1	SIDT1	UP	SIDT1
ENSG00000072864	-0.4816	5.59279	35.0566	3.20264e-09	3.99433e-05	9606	54820	NULL	16	16p13.11	nudE nuclear distribution E homolog 1 (A. nidulans)	protein-coding	NDE1	nudE nuclear distribution E homolog 1 (A. nidulans)	O	LIS1-interacting protein NUDE1, rat homo	NDE1	NO	#N/A
ENSG00000072954	0.108131	1.45578	0.311268	0.576903	1	9606	79041	NULL	19	19p13.11	transmembrane protein 38A	protein-coding	TMEM38A	transmembrane protein 38A	O	trimeric intracellular cation channel ty	TMEM38A	NO	#N/A
ENSG00000072958	-0.423666	6.79464	32.3192	1.30816e-08	0.000161274	9606	8907	NULL	19	19p13.12	adaptor-related protein complex 1, mu 1 subunit	protein-coding	AP1M1	adaptor-related protein complex 1, mu 1 subunit	O	AP-1 complex subunit mu-1|AP-mu chain fa	AP1M1	NO	#N/A
ENSG00000073008	-0.073099	6.32913	1.02741	0.310768	1	9606	5817	NULL	19	19q13.2	poliovirus receptor	protein-coding	PVR	poliovirus receptor	O	nectin-like 5|nectin-like protein 5	PVR	NO	#N/A
ENSG00000073050	-0.0921543	5.01034	0.996879	0.318067	1	9606	7515	NULL	19	19q13.2	X-ray repair complementing defective repair in Chinese hamster cells 1	protein-coding	XRCC1	X-ray repair complementing defective repair in Chinese hamster cells 1	O	DNA repair protein XRCC1|X-ray repair cr	XRCC1	NO	#N/A
ENSG00000073060	0.0806808	6.92287	1.24575	0.264366	1	9606	949	NULL	12	12q24.31	scavenger receptor class B, member 1	protein-coding	SCARB1	scavenger receptor class B, member 1	O	CD36 and LIMPII analogous 1|CD36 antigen	SCARB1	NO	#N/A
ENSG00000073111	-0.244998	8.09719	11.0036	0.000909352	1	9606	4171	NULL	3	3q21	minichromosome maintenance complex component 2	protein-coding	MCM2	minichromosome maintenance complex component 2	O	DNA replication licensing factor MCM2|MC	MCM2	NO	#N/A
ENSG00000073150	-0.453267	3.71001	17.5276	2.83167e-05	0.308538	9606	56666	RP3-402G11.9	22	22q13.33	pannexin 2	protein-coding	PANX2	pannexin 2	O	pannexin-2	PANX2	NO	#N/A
ENSG00000073169	-0.738344	4.37515	53.027	3.28995e-13	4.30193e-09	9606	83642	RP3-402G11.5	22	22q13.33	selenoprotein O	protein-coding	NULL	NULL	NULL	NULL	SELO	NO	#N/A
ENSG00000073282	-0.299036	0.678507	1.421	0.233239	1	9606	8626	NULL	3	3q28	tumor protein p63	protein-coding	TP63	tumor protein p63	O	CUSP|amplified in squamous cell carcinom	TP63	NO	#N/A
ENSG00000073331	0.219275	4.01025	4.39932	0.0359533	1	9606	80216	NULL	4	4q25	alpha-kinase 1	protein-coding	ALPK1	alpha-kinase 1	O	alpha-protein kinase 1|chromosome 4 kina	ALPK1	NO	#N/A
ENSG00000073350	0.588679	0.355456	4.40668	0.0357985	1	9606	3993	NULL	17	17q25.1	lethal giant larvae homolog 2 (Drosophila)	protein-coding	LLGL2	lethal giant larvae homolog 2 (Drosophila)	O	human giant larvae homolog|lethal(2) gia	LLGL2	NO	#N/A
ENSG00000073417	-0.188075	5.38578	3.49229	0.0616551	1	9606	5151	NULL	15	15q25.3	phosphodiesterase 8A	protein-coding	PDE8A	phosphodiesterase 8A	O	cAMP-specific cyclic nucleotide phosphod	PDE8A	NO	#N/A
ENSG00000073464	0.0652742	4.91668	0.493307	0.482456	1	9606	1183	NULL	X	Xp22.3	chloride channel, voltage-sensitive 4	protein-coding	CLCN4	chloride channel, voltage-sensitive 4	O	H(+)/Cl(-) exchange transporter 4|chlori	CLCN4	NO	#N/A
ENSG00000073536	-0.266953	4.45698	5.325	0.0210216	1	9606	54475	HUSSY-07	17	17q12	notchless homolog 1 (Drosophila)	protein-coding	NLE1	notchless homolog 1 (Drosophila)	O	Notchless gene homolog|notchless protein	NLE1	NO	#N/A
ENSG00000073578	-0.199611	6.18122	5.26314	0.0217817	1	9606	6389	NULL	5	5p15	succinate dehydrogenase complex, subunit A, flavoprotein (Fp)	protein-coding	SDHA	succinate dehydrogenase complex, subunit A, flavoprotein (Fp)	O	flavoprotein subunit of complex II|succi	SDHA	NO	#N/A
ENSG00000073584	-0.0198088	8.24298	0.092187	0.761415	1	9606	6605	NULL	17	17q21.2	SWI/SNF related, matrix associated, actin dependent regulator of chromatin, subfamily e, member 1	protein-coding	SMARCE1	SWI/SNF related, matrix associated, actin dependent regulator of chromatin, subfamily e, member 1	O	BRG1-associated factor 57|SWI/SNF-relate	SMARCE1	NO	#N/A
ENSG00000073605	0.256372	2.59759	2.78804	0.0949704	1	9606	55876	PP4052	17	17q12	gasdermin B	protein-coding	GSDMB	gasdermin B	O	gasdermin-B|gasdermin-like protein	GSDMB	NO	#N/A
ENSG00000073614	-0.0945175	6.40273	0.978622	0.322539	1	9606	5927	NULL	12	12p11	lysine (K)-specific demethylase 5A	protein-coding	KDM5A	lysine (K)-specific demethylase 5A	O	Jumonji, AT rich interactive domain 1A (	KDM5A	NO	#N/A
ENSG00000073670	-0.0294332	2.2599	0.031344	0.859475	1	9606	4185	NULL	17	17q21.3	ADAM metallopeptidase domain 11	protein-coding	ADAM11	ADAM metallopeptidase domain 11	O	ADAM 11|disintegrin and metalloproteinas	ADAM11	NO	#N/A
ENSG00000073711	0.237935	4.48865	4.71618	0.02988	1	9606	5523	NULL	3	3q22.1	protein phosphatase 2, regulatory subunit B'', alpha	protein-coding	PPP2R3A	protein phosphatase 2, regulatory subunit B'', alpha	O	PP2A subunit B isoforms B72/B130|PP2A, s	PPP2R3A	NO	#N/A
ENSG00000073712	0.209858	5.60105	5.60132	0.017947	1	9606	10979	NULL	14	14q22.1	fermitin family member 2	protein-coding	FERMT2	fermitin family member 2	O	PH domain-containing family C member 1|f	FERMT2	NO	#N/A
ENSG00000073756	0.600168	2.18516	13.3987	0.000251802	1	9606	5743	NULL	1	1q25.2-q25.3	prostaglandin-endoperoxide synthase 2 (prostaglandin G/H synthase and cyclooxygenase)	protein-coding	PTGS2	prostaglandin-endoperoxide synthase 2 (prostaglandin G/H synthase and cyclooxygenase)	O	PGH synthase 2|PHS II|cyclooxygenase 2b|	PTGS2	NO	#N/A
ENSG00000073792	-0.280498	6.62396	13.2449	0.000273326	1	9606	10644	NULL	3	3q27.2	insulin-like growth factor 2 mRNA binding protein 2	protein-coding	IGF2BP2	insulin-like growth factor 2 mRNA binding protein 2	O	IGF-II mRNA-binding protein 2|IGF2 mRNA-	IGF2BP2	NO	#N/A
ENSG00000073803	0.575801	4.79754	41.4327	1.22003e-10	1.55553e-06	9606	9175	NULL	3	3q27	mitogen-activated protein kinase kinase kinase 13	protein-coding	MAP3K13	mitogen-activated protein kinase kinase kinase 13	O	leucine zipper-bearing kinase|mixed line	MAP3K13	NO	#N/A
ENSG00000073849	-0.441898	3.78772	15.6004	7.82391e-05	0.828709	9606	6480	NULL	3	3q27-q28	ST6 beta-galactosamide alpha-2,6-sialyltranferase 1	protein-coding	ST6GAL1	ST6 beta-galactosamide alpha-2,6-sialyltranferase 1	O	B-cell antigen CD75|CMP-N-acetylneuramin	ST6GAL1	NO	#N/A
ENSG00000073910	0.257353	2.01318	2.12868	0.144565	1	9606	10129	RP11-37E23.6	13	13q13.1	furry homolog (Drosophila)	protein-coding	FRY	furry homolog (Drosophila)	O	WUGSC:H_2G3A.1|protein furry homolog	FRY	NO	#N/A
ENSG00000073921	0.174069	7.91235	4.56547	0.0326228	1	9606	8301	NULL	11	11q14	phosphatidylinositol binding clathrin assembly protein	protein-coding	PICALM	phosphatidylinositol binding clathrin assembly protein	O	clathrin assembly lymphoid myeloid leuke	PICALM	NO	#N/A
ENSG00000073969	-0.0151922	7.0964	0.0323798	0.857197	1	9606	4905	NULL	17	17q21	N-ethylmaleimide-sensitive factor	protein-coding	NSF	N-ethylmaleimide-sensitive factor	O	N-ethylmaleimide-sensitive factor-like p	NSF	NO	#N/A
ENSG00000074047	-0.387667	6.23297	16.3179	5.35551e-05	0.573254	9606	2736	NULL	2	2q14	GLI family zinc finger 2	protein-coding	GLI2	GLI family zinc finger 2	O	GLI-Kruppel family member GLI2|glioma-as	GLI2	NO	#N/A
ENSG00000074054	-0.166867	6.40498	3.2775	0.0702356	1	9606	23332	NULL	2	2q14.2-q14.3	cytoplasmic linker associated protein 1	protein-coding	CLASP1	cytoplasmic linker associated protein 1	O	CLIP-associating protein 1|cytoplasmic l	CLASP1	NO	#N/A
ENSG00000074071	-0.775453	6.69406	40.9171	1.58824e-10	2.02088e-06	9606	65993	NULL	16	16p13.3	mitochondrial ribosomal protein S34	protein-coding	MRPS34	mitochondrial ribosomal protein S34	O	28S ribosomal protein S34, mitochondrial	MRPS34	NO	#N/A
ENSG00000074181	-0.211758	7.02391	4.25281	0.0391854	1	9606	4854	NULL	19	19p13.2-p13.1	notch 3	protein-coding	NOTCH3	notch 3	O	Notch homolog 3|neurogenic locus notch h	NOTCH3	NO	#N/A
ENSG00000074201	-0.268137	7.5475	14.2523	0.000159864	1	9606	1207	NULL	11	11q13.5-q14	chloride channel, nucleotide-sensitive, 1A	protein-coding	CLNS1A	chloride channel, nucleotide-sensitive, 1A	O	chloride channel regulatory protein|chlo	CLNS1A	NO	#N/A
ENSG00000074219	0.0483226	3.98732	0.152046	0.696588	1	9606	8463	NULL	19	19q13.3	TEA domain family member 2	protein-coding	TEAD2	TEA domain family member 2	O	transcriptional enhancer factor TEF-4	TEAD2	NO	#N/A
ENSG00000074266	-0.0123296	5.57175	0.0165168	0.897739	1	9606	8726	NULL	11	11q14.2-q22.3	embryonic ectoderm development	protein-coding	EED	embryonic ectoderm development	O	WD protein associating with integrin cyt	EED	NO	#N/A
ENSG00000074319	0.372752	6.57083	26.0042	3.40682e-07	0.00404423	9606	7251	NULL	11	11p15	tumor susceptibility gene 101	protein-coding	TSG101	tumor susceptibility gene 101	O	ESCRT-I complex subunit TSG101|tumor sus	TSG101	NO	#N/A
ENSG00000074356	0.0756746	5.1442	0.659316	0.416802	1	9606	55421	NULL	17	17p13.2	chromosome 17 open reading frame 85	protein-coding	C17orf85	chromosome 17 open reading frame 85	O	uncharacterized protein C17orf85	C17orf85	NO	#N/A
ENSG00000074370	1.68669	2.19017	93.3294	4.42764e-22	6.01229e-18	9606	489	NULL	17	17p13.3	ATPase, Ca++ transporting, ubiquitous	protein-coding	ATP2A3	ATPase, Ca++ transporting, ubiquitous	O	ATPase, Ca(2+)-transporting, ubiquitous|	ATP2A3	UP	ATP2A3
ENSG00000074410	-0.424776	7.06923	41.3331	1.28374e-10	1.63638e-06	9606	771	NULL	15	15q22	carbonic anhydrase XII	protein-coding	CA12	carbonic anhydrase XII	O	CA-XII|carbonate dehydratase XII|carboni	CA12	NO	#N/A
ENSG00000074416	-0.245983	5.36282	6.75411	0.00935321	1	9606	11343	NULL	3	3q21.3	monoglyceride lipase	protein-coding	MGLL	monoglyceride lipase	O	lysophospholipase homolog|monoacylglycer	MGLL	NO	#N/A
ENSG00000074527	0.529558	7.81759	48.9748	2.59277e-12	3.36723e-08	9606	59277	NULL	12	12q22	netrin 4	protein-coding	NTN4	netrin 4	O	beta-netrin|hepar-derived netrin-like pr	NTN4	NO	#N/A
ENSG00000074582	-0.0947118	5.39007	0.719262	0.396386	1	9606	617	NULL	2	2q33	BC1 (ubiquinol-cytochrome c reductase) synthesis-like	protein-coding	BCS1L	BC1 (ubiquinol-cytochrome c reductase) synthesis-like	O	BCS1-like protein|h-BCS1|mitochondrial c	BCS1L	NO	#N/A
ENSG00000074590	-0.405639	4.36368	14.8394	0.000117064	1	9606	9891	NULL	12	12q23.3	NUAK family, SNF1-like kinase, 1	protein-coding	NUAK1	NUAK family, SNF1-like kinase, 1	O	AMP-activated protein kinase family memb	NUAK1	NO	#N/A
ENSG00000074603	0.280751	5.66582	9.73	0.00181284	1	9606	54878	MSTP097	15	15q22	dipeptidyl-peptidase 8	protein-coding	DPP8	dipeptidyl-peptidase 8	O	DPP VIII|DPRP-1|dipeptidyl peptidase 8|d	DPP8	NO	#N/A
ENSG00000074621	-0.834737	3.06804	42.3036	7.81495e-11	9.98907e-07	9606	9187	NULL	15	15q22	solute carrier family 24 (sodium/potassium/calcium exchanger), member 1	protein-coding	SLC24A1	solute carrier family 24 (sodium/potassium/calcium exchanger), member 1	O	Na(+)/K(+)/Ca(2+)-exchange protein 1|ret	SLC24A1	NO	#N/A
ENSG00000074657	0.0360605	5.78763	0.178692	0.6725	1	9606	55205	NULL	18	18q21.32	zinc finger protein 532	protein-coding	ZNF532	zinc finger protein 532	O	NULL	ZNF532	NO	#N/A
ENSG00000074695	0.186267	7.0184	5.1771	0.0228865	1	9606	3998	NULL	18	18q21.3-q22	lectin, mannose-binding, 1	protein-coding	LMAN1	lectin, mannose-binding, 1	O	ER-Golgi intermediate compartment 53 kDa	LMAN1	NO	#N/A
ENSG00000074696	-0.435284	7.38505	35.9642	2.00978e-09	2.51705e-05	#N/A	#N/A	#N/A	#N/A	#N/A	#N/A	#N/A	#N/A	#N/A	#N/A	#N/A	HACD3	NO	#N/A
ENSG00000074755	-0.115821	5.5467	1.43817	0.230436	1	9606	23140	NULL	17	17p13.2	zinc finger, ZZ-type with EF-hand domain 1	protein-coding	ZZEF1	zinc finger, ZZ-type with EF-hand domain 1	O	zinc finger ZZ-type and EF-hand domain-c	ZZEF1	NO	#N/A
ENSG00000074800	-0.334127	11.0248	19.1837	1.18725e-05	0.132378	9606	2023	NULL	1	1p36.2	enolase 1, (alpha)	protein-coding	ENO1	enolase 1, (alpha)	O	2-phospho-D-glycerate hydro-lyase|MYC pr	ENO1	NO	#N/A
ENSG00000074842	-0.59238	6.28132	13.1294	0.000290699	1	#N/A	#N/A	#N/A	#N/A	#N/A	#N/A	#N/A	#N/A	#N/A	#N/A	#N/A	MYDGF	NO	#N/A
ENSG00000074855	-0.172227	3.52281	1.52526	0.216825	1	9606	57719	NULL	19	19p13.11	anoctamin 8	protein-coding	ANO8	anoctamin 8	O	anoctamin-8|transmembrane protein 16H	ANO8	NO	#N/A
ENSG00000074935	-0.209655	3.94863	3.30715	0.068979	1	9606	51175	RP1-142L7.1	6	6q21	tubulin, epsilon 1	protein-coding	TUBE1	tubulin, epsilon 1	O	epsilon-tubulin|tubulin epsilon chain	TUBE1	NO	#N/A
ENSG00000074964	0.197907	4.75879	4.62445	0.0315193	1	9606	55160	RP11-473A10.1	1	1p36.13	Rho guanine nucleotide exchange factor (GEF) 10-like	protein-coding	ARHGEF10L	Rho guanine nucleotide exchange factor (GEF) 10-like	O	rho guanine nucleotide exchange factor 1	ARHGEF10L	NO	#N/A
ENSG00000075089	0.0892807	5.33537	1.15022	0.283504	1	9606	64431	CDA12	12	12q23.1	ARP6 actin-related protein 6 homolog (yeast)	protein-coding	ACTR6	ARP6 actin-related protein 6 homolog (yeast)	O	actin-related protein 6	ACTR6	NO	#N/A
ENSG00000075131	0.401564	4.307	15.1998	9.67122e-05	1	9606	54962	NULL	15	15q22.31	TIMELESS interacting protein	protein-coding	TIPIN	TIMELESS interacting protein	O	CSM3 homolog|TIMELESS-interacting protei	TIPIN	NO	#N/A
ENSG00000075142	0.0549425	6.43075	0.413894	0.52	1	9606	6717	NULL	7	7q21.1	sorcin	protein-coding	SRI	sorcin	O	22 kDa protein|H_RG167B05.1|calcium bind	SRI	NO	#N/A
ENSG00000075151	-0.206381	7.15747	5.90105	0.0151319	1	9606	8672	RP11-190H11.1	1	1p36.12	eukaryotic translation initiation factor 4 gamma, 3	protein-coding	EIF4G3	eukaryotic translation initiation factor 4 gamma, 3	O	eIF-4-gamma 3|eIF-4-gamma II|eukaryotic	EIF4G3	NO	#N/A
ENSG00000075188	0.181006	5.64092	4.15107	0.0416082	1	9606	79023	NULL	12	12q23.2	nucleoporin 37kDa	protein-coding	NUP37	nucleoporin 37kDa	O	nucleoporin Nup37|nup107-160 subcomplex	NUP37	NO	#N/A
ENSG00000075213	-0.22369	2.81056	2.69443	0.1007	1	9606	10371	NULL	7	7p12.1	sema domain, immunoglobulin domain (Ig), short basic domain, secreted, (semaphorin) 3A	protein-coding	SEMA3A	sema domain, immunoglobulin domain (Ig), short basic domain, secreted, (semaphorin) 3A	O	collapsin 1|semaphorin D|semaphorin III|	SEMA3A	NO	#N/A
ENSG00000075218	-0.470926	5.60996	35.3096	2.81238e-09	3.51098e-05	9606	51512	RP5-1163J1.2	22	22q13.2-q13.3	G-2 and S-phase expressed 1	protein-coding	GTSE1	G-2 and S-phase expressed 1	O	G2 and S phase-expressed protein 1|prote	GTSE1	NO	#N/A
ENSG00000075223	0.167375	7.98455	2.9574	0.0854852	1	9606	10512	NULL	7	7q21-q31	sema domain, immunoglobulin domain (Ig), short basic domain, secreted, (semaphorin) 3C	protein-coding	SEMA3C	sema domain, immunoglobulin domain (Ig), short basic domain, secreted, (semaphorin) 3C	O	sema E|semaphorin E|semaphorin-3C|semaph	SEMA3C	NO	#N/A
ENSG00000075234	-0.665058	2.81196	23.721	1.11363e-06	0.0129994	9606	55020	LL22NC03-5H6.5	22	22q13	tetratricopeptide repeat domain 38	protein-coding	TTC38	tetratricopeptide repeat domain 38	O	TPR repeat protein 38|tetratricopeptide	TTC38	NO	#N/A
ENSG00000075239	0.307546	6.42579	17.9908	2.21979e-05	0.243555	9606	38	NULL	11	11q22.3	acetyl-CoA acetyltransferase 1	protein-coding	ACAT1	acetyl-CoA acetyltransferase 1	O	acetoacetyl Coenzyme A thiolase|acetoace	ACAT1	NO	#N/A
ENSG00000075240	-0.576372	3.81305	22.9962	1.62323e-06	0.0188311	9606	23151	RP6-59H18.4	22	22q13.31	GRAM domain containing 4	protein-coding	GRAMD4	GRAM domain containing 4	O	GRAM domain-containing protein 4|death-i	GRAMD4	NO	#N/A
ENSG00000075275	-0.672692	2.94815	20.5575	5.78665e-06	0.0655106	9606	9620	RP5-1163J1.5	22	22q13.3	cadherin, EGF LAG seven-pass G-type receptor 1	protein-coding	CELSR1	cadherin, EGF LAG seven-pass G-type receptor 1	O	cadherin EGF LAG seven-pass G-type recep	CELSR1	NO	#N/A
ENSG00000075292	0.0584581	6.69351	0.463352	0.496062	1	9606	27332	NULL	2	2p13.1	zinc finger protein 638	protein-coding	ZNF638	zinc finger protein 638	O	CTCL tumor antigen se33-1|CTCL-associate	ZNF638	NO	#N/A
ENSG00000075303	0.292756	4.8561	7.3428	0.00673318	1	9606	55972	NULL	7	7q21.12	solute carrier family 25, member 40	protein-coding	SLC25A40	solute carrier family 25, member 40	O	mitochondrial carrier family protein|sol	SLC25A40	NO	#N/A
ENSG00000075336	-0.266168	4.72471	7.02812	0.00802397	1	9606	29090	HSPC154	18	18q22.3	translocase of inner mitochondrial membrane 21 homolog (yeast)	protein-coding	TIMM21	translocase of inner mitochondrial membrane 21 homolog (yeast)	O	TIM21-like protein, mitochondrial|mitoch	TIMM21	NO	#N/A
ENSG00000075340	-0.0664405	5.04938	0.647031	0.421176	1	9606	119	NULL	2	2p13.3	adducin 2 (beta)	protein-coding	ADD2	adducin 2 (beta)	O	beta-adducin|erythrocyte adducin subunit	ADD2	NO	#N/A
ENSG00000075391	-0.03736	5.98761	0.11223	0.73762	1	9606	9462	RP4-593C16.1	1	1q24	RAS protein activator like 2	protein-coding	RASAL2	RAS protein activator like 2	O	RAS protein activator-like 2|Ras protein	RASAL2	NO	#N/A
ENSG00000075399	0.0751561	2.82392	0.277176	0.598558	1	9606	9605	NULL	16	16q24	VPS9 domain containing 1	protein-coding	VPS9D1	VPS9 domain containing 1	O	VPS9 domain-containing protein 1	VPS9D1	NO	#N/A
ENSG00000075407	-0.152551	4.81237	2.07879	0.149359	1	9606	7587	NULL	10	10p11.2	zinc finger protein 37A	protein-coding	ZNF37A	zinc finger protein 37A	O	zinc finger protein 37a (KOX 21)|zinc fi	ZNF37A	NO	#N/A
ENSG00000075413	-0.209501	5.76265	6.23786	0.0125047	1	9606	4140	NULL	14	14q32.3	MAP/microtubule affinity-regulating kinase 3	protein-coding	MARK3	MAP/microtubule affinity-regulating kinase 3	O	C-TAK1|ELKL motif kinase 2|EMK-2|cdc25C-	MARK3	NO	#N/A
ENSG00000075415	-0.0410952	8.91933	0.356726	0.55033	1	9606	5250	OK/SW-cl.48	12	12q23	solute carrier family 25 (mitochondrial carrier; phosphate carrier), member 3	protein-coding	SLC25A3	solute carrier family 25 (mitochondrial carrier; phosphate carrier), member 3	O	mitochondrial phosphate carrier protein|	SLC25A3	NO	#N/A
ENSG00000075420	-0.102357	6.49492	1.12568	0.288698	1	9606	64778	UNQ2421/PRO4979/PRO34274	3	3q26.31	fibronectin type III domain containing 3B	protein-coding	FNDC3B	fibronectin type III domain containing 3B	O	HCV NS5A-binding protein 37|factor for a	FNDC3B	NO	#N/A
ENSG00000075426	0.020653	7.57796	0.0955992	0.757176	1	9606	2355	NULL	2	2p23.3	FOS-like antigen 2	protein-coding	FOSL2	FOS-like antigen 2	O	FRA-2|fos-related antigen 2	FOSL2	NO	#N/A
ENSG00000075539	-0.079894	6.22929	0.515654	0.472702	1	9606	285527	NULL	4	4p11	FRY-like	protein-coding	FRYL	FRY-like	O	ALL1-fused gene from chromosome 4p12 pro	FRYL	NO	#N/A
ENSG00000075568	0.136461	6.68608	1.39278	0.237936	1	9606	23505	NULL	2	2q11.2	transmembrane protein 131	protein-coding	TMEM131	transmembrane protein 131	O	2610524E03Rik	TMEM131	NO	#N/A
ENSG00000075618	0.10034	7.16275	1.96172	0.16133	1	9606	6624	NULL	7	7p22	fascin homolog 1, actin-bundling protein (Strongylocentrotus purpuratus)	protein-coding	FSCN1	fascin homolog 1, actin-bundling protein (Strongylocentrotus purpuratus)	O	55 kDa actin-bundling protein|fascin|sin	FSCN1	NO	#N/A
ENSG00000075624	-0.387811	12.1459	36.1649	1.81303e-09	2.2719e-05	9606	60	NULL	7	7p22	actin, beta	protein-coding	ACTB	actin, beta	O	PS1TP5-binding protein 1|actin, cytoplas	ACTB	NO	#N/A
ENSG00000075643	0.0703152	1.72999	0.135481	0.712815	1	9606	55034	NULL	18	18q12	molybdenum cofactor sulfurase	protein-coding	MOCOS	molybdenum cofactor sulfurase	O	moCo sulfurase	MOCOS	NO	#N/A
ENSG00000075651	0.850912	3.39247	44.8125	2.16833e-11	2.7889e-07	9606	5337	NULL	3	3q26	phospholipase D1, phosphatidylcholine-specific	protein-coding	PLD1	phospholipase D1, phosphatidylcholine-specific	O	choline phosphatase 1|phosphatidylcholin	PLD1	NO	#N/A
ENSG00000075702	-0.231262	5.97126	6.30491	0.0120404	1	9606	284403	NULL	19	19q13.12	WD repeat domain 62	protein-coding	WDR62	WD repeat domain 62	O	WD repeat-containing protein 62|microcep	WDR62	NO	#N/A
ENSG00000075711	-0.0741873	7.01653	0.549303	0.458603	1	9606	1739	NULL	3	3q29	discs, large homolog 1 (Drosophila)	protein-coding	DLG1	discs, large homolog 1 (Drosophila)	O	disks large homolog 1|presynaptic protei	DLG1	NO	#N/A
ENSG00000075785	-0.117532	8.9566	3.68908	0.0547697	1	9606	7879	NULL	3	3q21.3	RAB7A, member RAS oncogene family	protein-coding	RAB7A	RAB7A, member RAS oncogene family	O	RAB7, member RAS oncogene family|Ras-ass	RAB7A	NO	#N/A
ENSG00000075790	0.526771	5.89924	28.2578	1.06186e-07	0.00127997	9606	55973	NULL	7	7q22.3	B-cell receptor-associated protein 29	protein-coding	BCAP29	B-cell receptor-associated protein 29	O	BCR-associated protein 29	BCAP29	NO	#N/A
ENSG00000075826	0.344927	2.23536	4.52595	0.0333845	1	9606	25956	NULL	10	10q24.31	SEC31 homolog B (S. cerevisiae)	protein-coding	SEC31B	SEC31 homolog B (S. cerevisiae)	O	SEC31-like 2|SEC31-like protein 2|SEC31-	SEC31B	NO	#N/A
ENSG00000075856	-0.149249	7.12817	4.18051	0.0408913	1	9606	9733	NULL	12	12q24.1	squamous cell carcinoma antigen recognized by T cells 3	protein-coding	SART3	squamous cell carcinoma antigen recognized by T cells 3	O	SART-3|hSART-3|squamous cell carcinoma a	SART3	NO	#N/A
ENSG00000075914	-0.491795	4.96358	20.5117	5.92686e-06	0.0670328	9606	23016	NULL	3	3p21.31	exosome component 7	protein-coding	EXOSC7	exosome component 7	O	exosome complex component RRP42|exosome	EXOSC7	NO	#N/A
ENSG00000075945	0.26802	5.04851	6.82185	0.00900492	1	9606	22920	RP1-190I16.1	1	1q24.2	kinesin-associated protein 3	protein-coding	KIFAP3	kinesin-associated protein 3	O	small G protein GDP dissociation stimula	KIFAP3	NO	#N/A
ENSG00000075975	-0.0366418	6.04457	0.258145	0.611398	1	9606	23609	HSPC070	3	3p25	makorin ring finger protein 2	protein-coding	MKRN2	makorin ring finger protein 2	O	RING finger protein 62|makorin RING zinc	MKRN2	NO	#N/A
ENSG00000076003	-0.527184	7.41855	42.0314	8.98175e-11	1.14697e-06	9606	4175	NULL	2	2q21	minichromosome maintenance complex component 6	protein-coding	MCM6	minichromosome maintenance complex component 6	O	DNA replication licensing factor MCM6|MC	MCM6	NO	#N/A
ENSG00000076043	-0.00893057	6.48508	0.00814676	0.928081	1	9606	25996	CGI-114	11	11q23.2	REX2, RNA exonuclease 2 homolog (S. cerevisiae)	protein-coding	REXO2	REX2, RNA exonuclease 2 homolog (S. cerevisiae)	O	RNA exonuclease 2 homolog|oligoribonucle	REXO2	NO	#N/A
ENSG00000076053	0.154391	5.1512	2.27495	0.13148	1	9606	10179	NULL	11	11q23.1-q23.2	RNA binding motif protein 7	protein-coding	RBM7	RNA binding motif protein 7	O	RNA-binding motif protein 7|RNA-binding	RBM7	NO	#N/A
ENSG00000076067	0.511908	5.86873	28.7536	8.21956e-08	0.000993744	9606	5939	NULL	12	12q13.3	RNA binding motif, single stranded interacting protein 2	protein-coding	RBMS2	RNA binding motif, single stranded interacting protein 2	O	RNA-binding motif, single-stranded-inter	RBMS2	NO	#N/A
ENSG00000076108	-0.352463	6.90729	17.1583	3.43909e-05	0.372866	9606	11176	NULL	12	12q13.3	bromodomain adjacent to zinc finger domain, 2A	protein-coding	BAZ2A	bromodomain adjacent to zinc finger domain, 2A	O	TTF-I interacting peptide 5|TTF-I-intera	BAZ2A	NO	#N/A
ENSG00000076201	-0.266716	6.92012	11.1875	0.000823511	1	9606	25930	NULL	3	3p21.3	protein tyrosine phosphatase, non-receptor type 23	protein-coding	PTPN23	protein tyrosine phosphatase, non-receptor type 23	O	His-domain protein tyrosine phosphatase|	PTPN23	NO	#N/A
ENSG00000076242	-0.174018	5.87605	5.12117	0.0236357	1	9606	4292	NULL	3	3p21.3	mutL homolog 1, colon cancer, nonpolyposis type 2 (E. coli)	protein-coding	MLH1	mutL homolog 1, colon cancer, nonpolyposis type 2 (E. coli)	O	DNA mismatch repair protein Mlh1	MLH1	NO	#N/A
ENSG00000076248	-0.0731296	7.19932	0.722579	0.395299	1	9606	7374	NULL	12	12q23-q24.1	uracil-DNA glycosylase	protein-coding	UNG	uracil-DNA glycosylase	O	uracil-DNA glycosylase 1, uracil-DNA gly	UNG	NO	#N/A
ENSG00000076321	-0.0646977	5.46776	0.517855	0.471758	1	9606	27252	NULL	1	1q25.1	kelch-like family member 20	protein-coding	KLHL20	kelch-like family member 20	O	Kelch motif containing protein|kelch-lik	KLHL20	NO	#N/A
ENSG00000076351	-0.226629	3.59073	2.73398	0.0982344	1	9606	113235	NULL	17	17q11.2	solute carrier family 46 (folate transporter), member 1	protein-coding	SLC46A1	solute carrier family 46 (folate transporter), member 1	O	G21|PCFT/HCP1|heme carrier protein 1|pro	SLC46A1	NO	#N/A
ENSG00000076356	-0.727419	6.55374	79.8137	4.11428e-19	5.54234e-15	9606	5362	RP11-328D5.3	1	1q32.2	plexin A2	protein-coding	PLXNA2	plexin A2	O	plexin 2|plexin-A2|semaphorin receptor O	PLXNA2	NO	#N/A
ENSG00000076382	-0.46954	6.18004	35.2382	2.91737e-09	3.64059e-05	9606	10615	NULL	17	17q11.2	sperm associated antigen 5	protein-coding	SPAG5	sperm associated antigen 5	O	astrin|mitotic spindle associated protei	SPAG5	NO	#N/A
ENSG00000076513	0.339426	6.0039	10.9118	0.000955519	1	9606	88455	NULL	12	12q24.11	ankyrin repeat domain 13A	protein-coding	ANKRD13A	ankyrin repeat domain 13A	O	NY-REN-25 antigen|ankyrin repeat domain-	ANKRD13A	NO	#N/A
ENSG00000076554	0.298195	5.0047	11.8739	0.000569263	1	9606	7163	NULL	8	8q21	tumor protein D52	protein-coding	TPD52	tumor protein D52	O	prostate and colon associated protein|pr	TPD52	NO	#N/A
ENSG00000076555	0.0425941	3.6368	0.15213	0.696508	1	9606	32	NULL	12	12q24.11	acetyl-CoA carboxylase beta	protein-coding	ACACB	acetyl-CoA carboxylase beta	O	ACC-beta|acetyl-CoA carboxylase 2|acetyl	ACACB	NO	#N/A
ENSG00000076604	0.221694	4.77555	3.79437	0.0514252	1	9606	9618	NULL	17	17q11-q12	TNF receptor-associated factor 4	protein-coding	TRAF4	TNF receptor-associated factor 4	O	MLN 62|RING finger protein 83|cysteine-r	TRAF4	NO	#N/A
ENSG00000076641	0.142436	5.61541	2.10121	0.147183	1	9606	55824	NULL	8	8q21.13	phosphoprotein associated with glycosphingolipid microdomains 1	protein-coding	PAG1	phosphoprotein associated with glycosphingolipid microdomains 1	O	Csk-binding protein|phosphoprotein assoc	PAG1	NO	#N/A
ENSG00000076650	-0.0233224	3.62316	0.0347534	0.852113	1	9606	55094	NULL	19	19q13.11	G patch domain containing 1	protein-coding	GPATCH1	G patch domain containing 1	O	G patch domain-containing protein 1|evol	GPATCH1	NO	#N/A
ENSG00000076662	-0.729533	2.80909	26.1739	3.12009e-07	0.00370854	9606	3385	NULL	19	19p13.3-p13.2	intercellular adhesion molecule 3	protein-coding	ICAM3	intercellular adhesion molecule 3	O	ICAM-3|intercellular adhesion molecule-3	ICAM3	NO	#N/A
ENSG00000076685	-0.145226	5.45427	3.00761	0.0828745	1	9606	22978	RP11-30H12.3	10	10q24.32	5'-nucleotidase, cytosolic II	protein-coding	NT5C2	5'-nucleotidase, cytosolic II	O	5'-nucleotidase (purine), cytosolic type	NT5C2	NO	#N/A
ENSG00000076706	0.694645	8.00728	120.324	5.37278e-28	7.36662e-24	9606	4162	NULL	11	11q23.3	melanoma cell adhesion molecule	protein-coding	MCAM	melanoma cell adhesion molecule	O	Gicerin|S-endo 1 endothelial-associated	MCAM	NO	#N/A
ENSG00000076716	0.15477	5.49575	3.76246	0.0524155	1	9606	2239	RP6-198C21.1	X	Xq26.1	glypican 4	protein-coding	GPC4	glypican 4	O	dJ900E8.1 (glypican 4)|glypican proteogl	GPC4	NO	#N/A
ENSG00000076770	0.0735705	4.33953	0.266585	0.605632	1	9606	55796	RP5-842K24.3	X	Xq26.2	muscleblind-like splicing regulator 3	protein-coding	MBNL3	muscleblind-like splicing regulator 3	O	Cys3His CCG1-required protein|muscleblin	MBNL3	NO	#N/A
ENSG00000076924	-0.426322	6.04055	30.9713	2.61868e-08	0.000320474	9606	56949	PP3898	19	19p13.2	XPA binding protein 2	protein-coding	XAB2	XPA binding protein 2	O	SYF1 homolog, RNA splicing factor|XPA-bi	XAB2	NO	#N/A
ENSG00000076928	-0.16857	7.22991	2.82248	0.0929529	1	9606	9138	NULL	19	19q13.13	Rho guanine nucleotide exchange factor (GEF) 1	protein-coding	ARHGEF1	Rho guanine nucleotide exchange factor (GEF) 1	O	115 kDa guanine nucleotide exchange fact	ARHGEF1	NO	#N/A
ENSG00000076984	0.0121225	5.71903	0.0233468	0.878559	1	9606	5609	NULL	19	19p13.3-p13.2	mitogen-activated protein kinase kinase 7	protein-coding	MAP2K7	mitogen-activated protein kinase kinase 7	O	JNK-activating kinase 2|JNKK 2|MAP kinas	MAP2K7	NO	#N/A
ENSG00000077044	0.0455374	6.01677	0.237664	0.625899	1	9606	8527	NULL	2	2q37.1	diacylglycerol kinase, delta 130kDa	protein-coding	DGKD	diacylglycerol kinase, delta 130kDa	O	DAG kinase delta|DGK-delta|diacylglycero	DGKD	NO	#N/A
ENSG00000077063	-0.143057	2.72684	1.09753	0.294809	1	9606	83992	NULL	7	7q31	cortactin binding protein 2	protein-coding	CTTNBP2	cortactin binding protein 2	O	cortactin-binding protein 2	CTTNBP2	NO	#N/A
ENSG00000077097	-8.79414e-05	7.98265	1.08785e-06	0.999168	1	9606	7155	NULL	3	3p24	topoisomerase (DNA) II beta 180kDa	protein-coding	TOP2B	topoisomerase (DNA) II beta 180kDa	O	DNA topoisomerase 2-beta|DNA topoisomera	TOP2B	NO	#N/A
ENSG00000077147	-0.161785	8.1128	4.6285	0.0314451	1	9606	56889	RP11-34E5.1	10	10q24.1	transmembrane 9 superfamily member 3	protein-coding	TM9SF3	transmembrane 9 superfamily member 3	O	SM-11044 binding protein|SM-11044-bindin	TM9SF3	NO	#N/A
ENSG00000077150	0.266706	5.49613	4.92773	0.0264289	1	9606	4791	NULL	10	10q24	nuclear factor of kappa light polypeptide gene enhancer in B-cells 2 (p49/p100)	protein-coding	NFKB2	nuclear factor of kappa light polypeptide gene enhancer in B-cells 2 (p49/p100)	O	DNA-binding factor KBF2|lymphocyte trans	NFKB2	NO	#N/A
ENSG00000077152	0.212179	6.13963	7.90493	0.00493002	1	9606	29089	HSPC150	1	1q32.1	ubiquitin-conjugating enzyme E2T (putative)	protein-coding	UBE2T	ubiquitin-conjugating enzyme E2T (putative)	O	HSPC150 protein similar to ubiquitin-con	UBE2T	NO	#N/A
ENSG00000077157	0.519453	4.76331	27.5133	1.56017e-07	0.00187204	9606	4660	NULL	1	1q32.1	protein phosphatase 1, regulatory subunit 12B	protein-coding	PPP1R12B	protein phosphatase 1, regulatory subunit 12B	O	myosin phosphatase target subunit 2|myos	PPP1R12B	NO	#N/A
ENSG00000077232	0.228637	7.86548	7.98886	0.00470661	1	9606	54431	UNQ495/PRO1012	2	2q32.1	DnaJ (Hsp40) homolog, subfamily C, member 10	protein-coding	DNAJC10	DnaJ (Hsp40) homolog, subfamily C, member 10	O	ER-resident protein ERdj5|J-domain-conta	DNAJC10	NO	#N/A
ENSG00000077235	-0.183997	7.83298	6.16025	0.0130653	1	9606	2975	NULL	16	16p12	general transcription factor IIIC, polypeptide 1, alpha 220kDa	protein-coding	GTF3C1	general transcription factor IIIC, polypeptide 1, alpha 220kDa	O	TF3C-alpha|TFIIIC 220 kDa subunit|TFIIIC	GTF3C1	NO	#N/A
ENSG00000077238	-0.184863	4.60421	2.54925	0.110347	1	9606	3566	582J2.1	16	16p12.1-p11.2	interleukin 4 receptor	protein-coding	IL4R	interleukin 4 receptor	O	IL-4 receptor subunit alpha|IL4R nirs va	IL4R	NO	#N/A
ENSG00000077254	0.262025	6.74058	9.19256	0.00243001	1	9606	23032	NULL	1	1p31.1	ubiquitin specific peptidase 33	protein-coding	USP33	ubiquitin specific peptidase 33	O	VHL-interacting deubiquitinating enzyme	USP33	NO	#N/A
ENSG00000077264	-0.359295	0.265167	1.57356	0.209691	1	9606	5063	RP5-914P14.3	X	Xq23	p21 protein (Cdc42/Rac)-activated kinase 3	protein-coding	PAK3	p21 protein (Cdc42/Rac)-activated kinase 3	O	PAK-3|beta-PAK|oligophrenin-3|p21 (CDKN1	PAK3	NO	#N/A
ENSG00000077312	-0.174881	6.40957	3.52692	0.06038	1	9606	6626	NULL	19	19q13.1	small nuclear ribonucleoprotein polypeptide A	protein-coding	SNRPA	small nuclear ribonucleoprotein polypeptide A	O	U1 small nuclear RNP-specific A|U1 small	SNRPA	NO	#N/A
ENSG00000077348	-0.123374	5.13574	0.963633	0.326273	1	9606	56915	NULL	19	19q13.1	exosome component 5	protein-coding	EXOSC5	exosome component 5	O	chronic myelogenous leukemia tumor antig	EXOSC5	NO	#N/A
ENSG00000077380	-0.180914	7.07285	6.28686	0.0121636	1	9606	1781	NULL	2	2q31.1	dynein, cytoplasmic 1, intermediate chain 2	protein-coding	DYNC1I2	dynein, cytoplasmic 1, intermediate chain 2	O	DH IC-2|cytoplasmic dynein 1 intermediat	DYNC1I2	NO	#N/A
ENSG00000077420	0.245849	4.69363	6.2761	0.0122377	1	9606	54518	RP11-128B16.1	10	10p12.1	amyloid beta (A4) precursor protein-binding, family B, member 1 interacting protein	protein-coding	APBB1IP	amyloid beta (A4) precursor protein-binding, family B, member 1 interacting protein	O	APBB1-interacting protein 1|PREL-1|RARP-	APBB1IP	NO	#N/A
ENSG00000077454	-0.150666	5.20789	3.27571	0.0703123	1	9606	4034	NULL	7	7q22	leucine-rich repeats and calponin homology (CH) domain containing 4	protein-coding	LRCH4	leucine-rich repeats and calponin homology (CH) domain containing 4	O	leucine rich repeat neuronal 4|leucine-r	LRCH4	NO	#N/A
ENSG00000077458	0.154513	4.27568	1.83033	0.176088	1	9606	143684	NULL	11	11q21	family with sequence similarity 76, member B	protein-coding	FAM76B	family with sequence similarity 76, member B	O	protein FAM76B	FAM76B	NO	#N/A
ENSG00000077463	-0.345928	4.17299	4.68109	0.0304963	1	9606	51548	NULL	19	19p13.3	sirtuin 6	protein-coding	SIRT6	sirtuin 6	O	NAD-dependent deacetylase sirtuin-6|NAD-	SIRT6	NO	#N/A
ENSG00000077514	0.181411	5.48022	4.18131	0.0408722	1	9606	10714	NULL	11	11q14	polymerase (DNA-directed), delta 3, accessory subunit	protein-coding	POLD3	polymerase (DNA-directed), delta 3, accessory subunit	O	DNA polymerase delta subunit 3|DNA polym	POLD3	NO	#N/A
ENSG00000077549	-0.236866	7.24576	9.73177	0.0018111	1	9606	832	RP4-657E11.7	1	1p36.1	capping protein (actin filament) muscle Z-line, beta	protein-coding	CAPZB	capping protein (actin filament) muscle Z-line, beta	O	F-actin-capping protein subunit beta|cap	CAPZB	NO	#N/A
ENSG00000077585	0.346454	2.93654	5.67674	0.0171913	1	9606	7107	RP5-985L19.1	1	1q42-q43	G protein-coupled receptor 137B	protein-coding	GPR137B	G protein-coupled receptor 137B	O	integral membrane protein GPR137B|transm	GPR137B	NO	#N/A
ENSG00000077616	0.536635	2.72259	11.8264	0.000583961	1	9606	10003	NULL	11	11q14.3-q21	N-acetylated alpha-linked acidic dipeptidase 2	protein-coding	NAALAD2	N-acetylated alpha-linked acidic dipeptidase 2	O	N-acetylated alpha-linked acidic dipepti	NAALAD2	NO	#N/A
ENSG00000077684	-0.0689231	6.14934	0.716005	0.397457	1	#N/A	#N/A	#N/A	#N/A	#N/A	#N/A	#N/A	#N/A	#N/A	#N/A	#N/A	JADE1	NO	#N/A
ENSG00000077713	-0.00213895	4.87285	0.00058292	0.980738	1	9606	203427	NULL	X	Xq24	solute carrier family 25, member 43	protein-coding	SLC25A43	solute carrier family 25, member 43	O	solute carrier family 25 member 43	SLC25A43	NO	#N/A
ENSG00000077721	0.199253	6.75078	8.18865	0.00421533	1	9606	7319	NULL	X	Xq24	ubiquitin-conjugating enzyme E2A	protein-coding	UBE2A	ubiquitin-conjugating enzyme E2A	O	HR6A|RAD6 homolog A|ubiquitin carrier pr	UBE2A	NO	#N/A
ENSG00000077782	-0.0823379	7.38131	1.50091	0.220532	1	9606	2260	NULL	8	8p12	fibroblast growth factor receptor 1	protein-coding	FGFR1	fibroblast growth factor receptor 1	O	FGFR1/PLAG1 fusion|FMS-like tyrosine kin	FGFR1	NO	#N/A
ENSG00000077942	0.473815	3.60536	15.5625	7.98205e-05	0.8449	9606	2192	CTA-941F9.7	22	22q13.31	fibulin 1	protein-coding	FBLN1	fibulin 1	O	fibulin-1	FBLN1	NO	#N/A
ENSG00000078018	-0.333655	2.58831	5.26966	0.0217002	1	9606	4133	NULL	2	2q34-q35	microtubule-associated protein 2	protein-coding	MAP2	microtubule-associated protein 2	O	MAP-2	MAP2	NO	#N/A
ENSG00000078043	0.248225	4.75395	5.84555	0.0156165	1	9606	9063	NULL	18	18q21.1	protein inhibitor of activated STAT, 2	protein-coding	PIAS2	protein inhibitor of activated STAT, 2	O	DAB2-interacting protein|E3 SUMO-protein	PIAS2	NO	#N/A
ENSG00000078053	-0.0568122	4.81702	0.365325	0.545563	1	9606	273	NULL	7	7p14-p13	amphiphysin	protein-coding	AMPH	amphiphysin	O	amphiphysin (Stiff-Mann syndrome with br	AMPH	NO	#N/A
ENSG00000078061	0.0334115	5.9552	0.172729	0.677698	1	9606	369	RP1-230G1.1	X	Xp11.4-p11.2	v-raf murine sarcoma 3611 viral oncogene homolog	protein-coding	ARAF	v-raf murine sarcoma 3611 viral oncogene homolog	O	A-Raf proto-oncogene serine/threonine-pr	ARAF	NO	#N/A
ENSG00000078070	0.477197	4.49623	23.2228	1.44279e-06	0.0167624	9606	56922	NULL	3	3q27	methylcrotonoyl-CoA carboxylase 1 (alpha)	protein-coding	MCCC1	methylcrotonoyl-CoA carboxylase 1 (alpha)	O	3-methylcrotonyl-CoA carboxylase 1|3-met	MCCC1	NO	#N/A
ENSG00000078098	0.442255	4.89829	18.3207	1.8667e-05	0.205841	9606	2191	NULL	2	2q23	fibroblast activation protein, alpha	protein-coding	FAP	fibroblast activation protein, alpha	O	170 kDa melanoma membrane-bound gelatina	FAP	NO	#N/A
ENSG00000078124	-0.176306	5.00409	2.80373	0.0940454	1	9606	55331	NULL	11	11q13.5	alkaline ceramidase 3	protein-coding	ACER3	alkaline ceramidase 3	O	alkCDase 3|alkaline CDase 3|alkaline dih	ACER3	NO	#N/A
ENSG00000078140	-0.234371	7.13699	8.60645	0.00334974	1	9606	3093	NULL	4	4p14	ubiquitin-conjugating enzyme E2K	protein-coding	UBE2K	ubiquitin-conjugating enzyme E2K	O	E2(25K)|HIP-2|huntingtin interacting pro	UBE2K	NO	#N/A
ENSG00000078142	0.0237924	5.02332	0.0443586	0.833188	1	9606	5289	NULL	18	18q12.3	phosphatidylinositol 3-kinase, catalytic subunit type 3	protein-coding	PIK3C3	phosphatidylinositol 3-kinase, catalytic subunit type 3	O	PI3-kinase type 3|PI3K type 3|PtdIns-3-k	PIK3C3	NO	#N/A
ENSG00000078177	0.325834	3.0148	4.17489	0.0410272	1	9606	55728	NULL	4	4p14	NEDD4 binding protein 2	protein-coding	N4BP2	NEDD4 binding protein 2	O	BCL-3-binding protein|NEDD4-binding prot	N4BP2	NO	#N/A
ENSG00000078237	0.00885779	4.30488	0.00656021	0.935446	1	#N/A	#N/A	#N/A	#N/A	#N/A	#N/A	#N/A	#N/A	#N/A	#N/A	#N/A	TIGAR	NO	#N/A
ENSG00000078246	0.021324	5.41721	0.0672022	0.795455	1	9606	7289	NULL	12	12p13.3	tubby like protein 3	protein-coding	TULP3	tubby like protein 3	O	tubby-like protein 3|tubby-related prote	TULP3	NO	#N/A
ENSG00000078269	-0.304523	7.9014	13.8017	0.000203157	1	9606	8871	RP11-266C7.2	6	6q25.3	synaptojanin 2	protein-coding	SYNJ2	synaptojanin 2	O	inositol phosphate 5'-phosphatase 2|syna	SYNJ2	NO	#N/A
ENSG00000078304	0.11861	6.30454	1.86211	0.172382	1	9606	5527	NULL	14	14q32.31	protein phosphatase 2, regulatory subunit B', gamma	protein-coding	PPP2R5C	protein phosphatase 2, regulatory subunit B', gamma	O	B' alpha regulatory subunit|PP2A B subun	PPP2R5C	NO	#N/A
ENSG00000078319	-0.0466738	1.6595	0.0569717	0.811348	1	9606	5379	tcag7.1111	7	7q22.1	postmeiotic segregation increased 2 pseudogene 1	pseudo	PMS2P1	postmeiotic segregation increased 2 pseudogene 1	O	NULL	PMS2P1	NO	#N/A
ENSG00000078369	-0.40564	8.6291	43.653	3.92075e-11	5.02719e-07	9606	2782	RP1-283E3.7	1	1p36.33	guanine nucleotide binding protein (G protein), beta polypeptide 1	protein-coding	GNB1	guanine nucleotide binding protein (G protein), beta polypeptide 1	O	G protein, beta-1 subunit|beta subunit,	GNB1	NO	#N/A
ENSG00000078403	-0.118718	5.25517	1.67507	0.19558	1	9606	8028	RP11-399C16.2	10	10p12	myeloid/lymphoid or mixed-lineage leukemia (trithorax homolog, Drosophila); translocated to, 10	protein-coding	MLLT10	myeloid/lymphoid or mixed-lineage leukemia (trithorax homolog, Drosophila); translocated to, 10	O	ALL1-fused gene from chromosome 10 prote	MLLT10	NO	#N/A
ENSG00000078487	-0.542479	0.987616	5.70528	0.016914	1	9606	55063	NULL	7	7q22.1	zinc finger, CW type with PWWP domain 1	protein-coding	ZCWPW1	zinc finger, CW type with PWWP domain 1	O	zinc finger CW-type PWWP domain protein	ZCWPW1	NO	#N/A
ENSG00000078596	0.393909	3.63918	10.0584	0.00151658	1	9606	9452	RP4-696H22.1	X	Xq13.3-Xq21.2	integral membrane protein 2A	protein-coding	ITM2A	integral membrane protein 2A	O	BRICHOS domain containing 2A	ITM2A	NO	#N/A
ENSG00000078618	-0.142391	7.23172	3.63134	0.0567011	1	9606	4898	RP4-657D16.2	1	1p32.2-p32.1	nardilysin (N-arginine dibasic convertase)	protein-coding	NRD1	nardilysin (N-arginine dibasic convertase)	O	NRD convertase|NRD-C|nardilysin	NRD1	NO	#N/A
ENSG00000078668	-0.0639204	7.01146	0.813424	0.36711	1	9606	7419	NULL	8	8p11.2	voltage-dependent anion channel 3	protein-coding	VDAC3	voltage-dependent anion channel 3	O	outer mitochondrial membrane protein por	VDAC3	NO	#N/A
ENSG00000078674	0.0172928	7.1025	0.031388	0.859378	1	9606	5108	NULL	8	8p22-p21.3	pericentriolar material 1	protein-coding	PCM1	pericentriolar material 1	O	PCM-1|hPCM-1|pericentriolar material 1 p	PCM1	NO	#N/A
ENSG00000078687	0.0699173	5.34384	0.72428	0.394744	1	9606	57690	NULL	17	17q25.3	trinucleotide repeat containing 6C	protein-coding	TNRC6C	trinucleotide repeat containing 6C	O	trinucleotide repeat-containing gene 6C	TNRC6C	NO	#N/A
ENSG00000078699	0.149978	4.41761	2.28585	0.130559	1	9606	9139	RP5-1137F22.1	20	20q11	core-binding factor, runt domain, alpha subunit 2; translocated to, 2	protein-coding	CBFA2T2	core-binding factor, runt domain, alpha subunit 2; translocated to, 2	O	ETO homolog on chromosome 20|ETO homolog	CBFA2T2	NO	#N/A
ENSG00000078725	-0.147832	0.66117	0.346905	0.55587	1	#N/A	#N/A	#N/A	#N/A	#N/A	#N/A	#N/A	#N/A	#N/A	#N/A	#N/A	BRINP1	NO	#N/A
ENSG00000078747	-0.00575353	6.07104	0.00371256	0.951414	1	9606	83737	NULL	20	20q11.22	itchy E3 ubiquitin protein ligase	protein-coding	ITCH	itchy E3 ubiquitin protein ligase	O	E3 ubiquitin-protein ligase Itchy homolo	ITCH	NO	#N/A
ENSG00000078804	1.14561	2.80336	68.3367	1.37829e-16	1.83919e-12	9606	58476	RP5-1181N3.1	20	20q11.22	tumor protein p53 inducible nuclear protein 2	protein-coding	TP53INP2	tumor protein p53 inducible nuclear protein 2	O	PIG-U|diabetes and obesity regulated|dia	TP53INP2	UP	TP53INP2
ENSG00000078808	-0.295731	7.42954	12.5195	0.000402716	1	9606	51150	RP5-902P8.6	1	1p36.33	stromal cell derived factor 4	protein-coding	SDF4	stromal cell derived factor 4	O	45 kDa calcium-binding protein	SDF4	NO	#N/A
ENSG00000078902	-0.583295	6.16757	35.9371	2.03795e-09	2.55213e-05	9606	54472	NULL	11	11p15.5	toll interacting protein	protein-coding	TOLLIP	toll interacting protein	O	adapter protein|toll-interacting protein	TOLLIP	NO	#N/A
ENSG00000078967	0.323478	5.37909	15.9605	6.46785e-05	0.688956	9606	51619	NULL	7	7p13	ubiquitin-conjugating enzyme E2D 4 (putative)	protein-coding	UBE2D4	ubiquitin-conjugating enzyme E2D 4 (putative)	O	ubiquitin carrier protein D4|ubiquitin-c	UBE2D4	NO	#N/A
ENSG00000079102	0.587209	1.2225	7.61506	0.0057883	1	9606	862	NULL	8	8q22	runt-related transcription factor 1; translocated to, 1 (cyclin D-related)	protein-coding	RUNX1T1	runt-related transcription factor 1; translocated to, 1 (cyclin D-related)	O	acute myelogenous leukemia 1 translocati	RUNX1T1	NO	#N/A
ENSG00000079134	0.0801404	4.42908	0.565001	0.452252	1	9606	9984	NULL	18	18p11.32	THO complex 1	protein-coding	THOC1	THO complex 1	O	THO complex subunit 1|hTREX84|nuclear ma	THOC1	NO	#N/A
ENSG00000079150	0.0283045	3.71639	0.0610323	0.804872	1	9606	51661	UNQ670/PRO1304	2	2q31.2	FK506 binding protein 7	protein-coding	FKBP7	FK506 binding protein 7	O	23 kDa FK506-binding protein|23 kDa FKBP	FKBP7	NO	#N/A
ENSG00000079156	0.325379	3.49601	6.03223	0.014047	1	9606	114880	NULL	2	2q32.1	oxysterol binding protein-like 6	protein-coding	OSBPL6	oxysterol binding protein-like 6	O	ORP-6|OSBP-related protein 6|oxysterol-b	OSBPL6	NO	#N/A
ENSG00000079215	0.344685	4.28665	12.7252	0.000360753	1	9606	6507	NULL	5	5p13	solute carrier family 1 (glial high affinity glutamate transporter), member 3	protein-coding	SLC1A3	solute carrier family 1 (glial high affinity glutamate transporter), member 3	O	GLAST-1|excitatory amino acid transporte	SLC1A3	NO	#N/A
ENSG00000079246	-0.121787	9.58765	2.61606	0.105787	1	9606	7520	NULL	2	2q35	X-ray repair complementing defective repair in Chinese hamster cells 5 (double-strand-break rejoining)	protein-coding	XRCC5	X-ray repair complementing defective repair in Chinese hamster cells 5 (double-strand-break rejoining)	O	86 kDa subunit of Ku antigen|ATP-depende	XRCC5	NO	#N/A
ENSG00000079263	0.949233	1.93086	29.3004	6.19835e-08	0.000752045	9606	11262	NULL	2	2q37.1	SP140 nuclear body protein	protein-coding	SP140	SP140 nuclear body protein	O	lymphoid-restricted homolog of Sp100|lym	SP140	NO	#N/A
ENSG00000079277	0.417228	3.56993	13.0372	0.000305357	1	9606	8569	RP11-49P4.3	1	1p33	MAP kinase interacting serine/threonine kinase 1	protein-coding	MKNK1	MAP kinase interacting serine/threonine kinase 1	O	MAP kinase signal-integrating kinase 1|M	MKNK1	NO	#N/A
ENSG00000079308	0.270839	6.18943	8.24362	0.00408955	1	9606	7145	MSTP091	2	2q35-q36	tensin 1	protein-coding	TNS1	tensin 1	O	Matrix-remodelling-associated protein 6|	TNS1	NO	#N/A
ENSG00000079313	-0.843757	6.10563	63.391	1.69494e-15	2.25003e-11	9606	57455	NULL	19	19p13.3	REX1, RNA exonuclease 1 homolog (S. cerevisiae)	protein-coding	REXO1	REX1, RNA exonuclease 1 homolog (S. cerevisiae)	O	RNA exonuclease 1 homolog|elongin A bind	REXO1	NO	#N/A
ENSG00000079332	-0.138705	6.71058	2.86674	0.0904277	1	9606	56681	RP11-367H5.4	10	10q22.1	SAR1 homolog A (S. cerevisiae)	protein-coding	SAR1A	SAR1 homolog A (S. cerevisiae)	O	COPII-associated small GTPase|GTP-bindin	SAR1A	NO	#N/A
ENSG00000079335	0.23742	3.91613	2.80887	0.0937447	1	9606	8556	NULL	1	1p21	cell division cycle 14A	protein-coding	CDC14A	cell division cycle 14A	O	CDC10 (cell division cycle 10, S. cerevi	CDC14A	NO	#N/A
ENSG00000079337	-1.02514	3.28228	56.1835	6.60134e-14	8.67482e-10	9606	10411	NULL	12	12q13.1	Rap guanine nucleotide exchange factor (GEF) 3	protein-coding	RAPGEF3	Rap guanine nucleotide exchange factor (GEF) 3	O	9330170P05Rik|EPAC 1|Rap1 guanine-nucleo	RAPGEF3	DOWN	RAPGEF3
ENSG00000079387	0.277582	5.89281	7.88407	0.0049872	1	9606	29843	NULL	12	12q13.1	SUMO1/sentrin specific peptidase 1	protein-coding	SENP1	SUMO1/sentrin specific peptidase 1	O	SUMO1/sentrin specific protease 1|sentri	SENP1	NO	#N/A
ENSG00000079432	-0.34823	6.82432	18.8209	1.43584e-05	0.159421	9606	23152	NULL	19	19q13.2	capicua transcriptional repressor	protein-coding	CIC	capicua transcriptional repressor	O	capicua homolog|protein capicua homolog	CIC	NO	#N/A
ENSG00000079435	-0.710907	2.61161	24.4257	7.72335e-07	0.00906644	9606	3991	NULL	19	19q13.2	lipase, hormone-sensitive	protein-coding	LIPE	lipase, hormone-sensitive	O	hormone-sensitive lipase|hormone-sensiti	LIPE	NO	#N/A
ENSG00000079459	-0.327491	7.43231	22.1676	2.49859e-06	0.0287613	9606	2222	NULL	8	8p23.1-p22	farnesyl-diphosphate farnesyltransferase 1	protein-coding	FDFT1	farnesyl-diphosphate farnesyltransferase 1	O	FPP:FPP farnesyltransferase|presqualene-	FDFT1	NO	#N/A
ENSG00000079462	0.0265475	4.61213	0.0560851	0.812794	1	9606	5050	NULL	19	19q13.1	platelet-activating factor acetylhydrolase 1b, catalytic subunit 3 (29kDa)	protein-coding	PAFAH1B3	platelet-activating factor acetylhydrolase 1b, catalytic subunit 3 (29kDa)	O	PAF acetylhydrolase 29 kDa subunit|PAF-A	PAFAH1B3	NO	#N/A
ENSG00000079482	-0.286587	2.58764	2.6714	0.102166	1	9606	4983	RP6-201G10.1	X	Xq12	oligophrenin 1	protein-coding	OPHN1	oligophrenin 1	O	mental retardation, X-linked 60|oligophr	OPHN1	NO	#N/A
ENSG00000079616	-0.65628	6.57789	45.7271	1.35929e-11	1.7524e-07	9606	3835	NULL	16	16p11.2	kinesin family member 22	protein-coding	KIF22	kinesin family member 22	O	kinesin-like DNA-binding protein pseudog	KIF22	NO	#N/A
ENSG00000079691	0.22626	3.87225	3.41742	0.0645118	1	9606	55604	NULL	6	6p22.2	leucine rich repeat containing 16A	protein-coding	LRRC16A	leucine rich repeat containing 16A	O	CARMIL homolog|capping protein, Arp2/3,	LRRC16A	NO	#N/A
ENSG00000079739	0.0258832	6.10318	0.100805	0.750866	1	9606	5236	NULL	1	1p31	phosphoglucomutase 1	protein-coding	PGM1	phosphoglucomutase 1	O	PGM 1|glucose phosphomutase 1|phosphoglu	PGM1	NO	#N/A
ENSG00000079785	-0.0833595	7.03133	1.47172	0.225074	1	9606	1653	NULL	2	2p24	DEAD (Asp-Glu-Ala-Asp) box helicase 1	protein-coding	DDX1	DEAD (Asp-Glu-Ala-Asp) box helicase 1	O	ATP-dependent RNA helicase DDX1|DEAD (As	DDX1	NO	#N/A
ENSG00000079805	-0.588246	7.02707	57.2459	3.84592e-14	5.06507e-10	9606	1785	NULL	19	19p13.2	dynamin 2	protein-coding	DNM2	dynamin 2	O	dynamin II|dynamin-2	DNM2	NO	#N/A
ENSG00000079819	-0.0562351	7.65511	0.351292	0.553383	1	9606	2037	RP3-324N14.1	6	6q23	erythrocyte membrane protein band 4.1-like 2	protein-coding	EPB41L2	erythrocyte membrane protein band 4.1-like 2	O	band 4.1-like protein 2|erythrocyte memb	EPB41L2	NO	#N/A
ENSG00000079931	0.0609592	4.33063	0.276429	0.599051	1	9606	26002	UNQ2493/PRO5780	6	6q23.2	monooxygenase, DBH-like 1	protein-coding	MOXD1	monooxygenase, DBH-like 1	O	DBH-like monooxygenase protein 1|dopamin	MOXD1	NO	#N/A
ENSG00000079950	0.486397	5.5485	28.2908	1.04392e-07	0.00125875	9606	8417	RP11-560I21.1	6	6q23.1	syntaxin 7	protein-coding	STX7	syntaxin 7	O	syntaxin-7	STX7	NO	#N/A
ENSG00000079974	-0.46158	3.66508	15.7204	7.34284e-05	0.779222	9606	11158	NULL	22	22q13.33	RAB, member of RAS oncogene family-like 2B	protein-coding	RABL2B	RAB, member of RAS oncogene family-like 2B	O	rab-like protein 2B	RABL2B	NO	#N/A
ENSG00000079999	-0.205278	6.6041	3.60199	0.0577105	1	9606	9817	NULL	19	19p13.2	kelch-like ECH-associated protein 1	protein-coding	KEAP1	kelch-like ECH-associated protein 1	O	cytosolic inhibitor of Nrf2|kelch-like f	KEAP1	NO	#N/A
ENSG00000080166	2.0323	1.4941	81.6514	1.62337e-19	2.18911e-15	9606	1638	NULL	13	13q32	dopachrome tautomerase	protein-coding	DCT	dopachrome tautomerase	O	DT|L-dopachrome Delta-isomerase|L-dopach	DCT	UP	DCT
ENSG00000080189	0.250959	6.00597	10.5533	0.00115984	1	9606	51006	RP11-394O2.1	20	20q13.12	solute carrier family 35, member C2	protein-coding	SLC35C2	solute carrier family 35, member C2	O	ovarian cancer overexpressed 1|ovarian c	SLC35C2	NO	#N/A
ENSG00000080200	-0.246351	4.91967	3.99571	0.0456161	1	9606	131544	NULL	3	3q11.2	beta-gamma crystallin domain containing 3	protein-coding	CRYBG3	beta-gamma crystallin domain containing 3	O	beta/gamma crystallin domain-containing	CRYBG3	NO	#N/A
ENSG00000080224	-0.502804	1.72479	7.59192	0.00586304	1	9606	285220	UNQ6114	3	3q11.2	EPH receptor A6	protein-coding	EPHA6	EPH receptor A6	O	EPH homology kinase 2|EPH-like kinase 12	EPHA6	NO	#N/A
ENSG00000080298	-0.270918	2.92868	4.15988	0.0413924	1	9606	5991	RP11-32F11.1	9	9p24.2	regulatory factor X, 3 (influences HLA class II expression)	protein-coding	RFX3	regulatory factor X, 3 (influences HLA class II expression)	O	DNA binding protein RFX3|regulatory fact	RFX3	NO	#N/A
ENSG00000080345	0.0419014	7.44559	0.149667	0.698854	1	9606	55183	NULL	2	2q23.3	RAP1 interacting factor homolog (yeast)	protein-coding	RIF1	RAP1 interacting factor homolog (yeast)	O	rap1-interacting factor 1 homolog|telome	RIF1	NO	#N/A
ENSG00000080371	0.0428291	6.51395	0.269265	0.603825	1	9606	23011	NULL	12	12q21.1	RAB21, member RAS oncogene family	protein-coding	RAB21	RAB21, member RAS oncogene family	O	ras-related protein Rab-21	RAB21	NO	#N/A
ENSG00000080493	-0.0102864	3.72668	0.00475275	0.945037	1	9606	8671	NULL	4	4q21	solute carrier family 4, sodium bicarbonate cotransporter, member 4	protein-coding	SLC4A4	solute carrier family 4, sodium bicarbonate cotransporter, member 4	O	Na(+)/HCO3(-) cotransporter|electrogenic	SLC4A4	NO	#N/A
ENSG00000080503	-0.0261565	5.45465	0.0553959	0.813927	1	9606	6595	NULL	9	9p22.3	SWI/SNF related, matrix associated, actin dependent regulator of chromatin, subfamily a, member 2	protein-coding	SMARCA2	SWI/SNF related, matrix associated, actin dependent regulator of chromatin, subfamily a, member 2	O	ATP-dependent helicase SMARCA2|BAF190B|B	SMARCA2	NO	#N/A
ENSG00000080546	-0.25013	3.0919	2.2892	0.130277	1	9606	27244	RP11-787I22.2	6	6q21	sestrin 1	protein-coding	SESN1	sestrin 1	O	p53 activated gene 26|p53 regulated PA26	SESN1	NO	#N/A
ENSG00000080561	0.108074	2.80699	0.382288	0.536381	1	9606	11043	RP6-191P20.2	X	Xq22.3	midline 2	protein-coding	MID2	midline 2	O	RING finger protein 60|midin 2|midin-2|m	MID2	NO	#N/A
ENSG00000080603	-0.397521	7.53396	11.4942	0.000698143	1	9606	10847	NULL	16	16p11.2	Snf2-related CREBBP activator protein	protein-coding	SRCAP	Snf2-related CREBBP activator protein	O	Snf2-related CBP activator protein|Swi2/	SRCAP	NO	#N/A
ENSG00000080608	-0.202397	6.16846	5.45299	0.0195348	1	9606	9933	RP11-526D20.2	9	9p24.2	KIAA0020	protein-coding	KIAA0020	KIAA0020	O	HBV X-transactivated gene 5 protein|HBV	KIAA0020	NO	#N/A
ENSG00000080802	0.143985	5.10427	1.73746	0.187461	1	9606	4850	NULL	7	7q22-qter	CCR4-NOT transcription complex, subunit 4	protein-coding	CNOT4	CCR4-NOT transcription complex, subunit 4	O	CCR4-NOT transcription complex subunit 4	CNOT4	NO	#N/A
ENSG00000080815	0.115618	5.06855	1.75516	0.185229	1	9606	5663	NULL	14	14q24.3	presenilin 1	protein-coding	PSEN1	presenilin 1	O	presenilin-1	PSEN1	NO	#N/A
ENSG00000080819	0.108775	6.32759	1.35559	0.244303	1	9606	1371	NULL	3	3q12	coproporphyrinogen oxidase	protein-coding	CPOX	coproporphyrinogen oxidase	O	COX|coprogen oxidase|coproporphyrinogen-	CPOX	NO	#N/A
ENSG00000080822	0.182775	7.18771	5.31628	0.0211271	1	9606	56650	HSPC174	3	3q12.1	claudin domain containing 1	protein-coding	CLDND1	claudin domain containing 1	O	claudin domain containing 1 protein|clau	CLDND1	NO	#N/A
ENSG00000080823	-0.0978616	3.87984	0.670271	0.412957	1	9606	5891	NULL	14	14q32	MOK protein kinase	protein-coding	MOK	MOK protein kinase	O	MAPK/MAK/MRK overlapping kinase|renal ce	MOK	NO	#N/A
ENSG00000080824	-0.308617	11.3483	22.0531	2.65204e-06	0.0304879	9606	3320	NULL	14	14q32.33	heat shock protein 90kDa alpha (cytosolic), class A member 1	protein-coding	HSP90AA1	heat shock protein 90kDa alpha (cytosolic), class A member 1	O	HSP 86|epididymis luminal secretory prot	HSP90AA1	NO	#N/A
ENSG00000080839	0.361293	5.37421	15.48	8.33808e-05	0.881502	9606	5933	RP11-382A12.1	20	20q11.2	retinoblastoma-like 1 (p107)	protein-coding	RBL1	retinoblastoma-like 1 (p107)	O	107 kDa retinoblastoma-associated protei	RBL1	NO	#N/A
ENSG00000080845	-0.224854	7.61042	11.8042	0.000590983	1	9606	22839	NULL	20	20q11.23	discs, large (Drosophila) homolog-associated protein 4	protein-coding	DLGAP4	discs, large (Drosophila) homolog-associated protein 4	O	DAP-4|PSD-95/SAP90-binding protein 4|SAP	DLGAP4	NO	#N/A
ENSG00000080947	0.896279	1.95082	26.3341	2.87176e-07	0.00341855	9606	114819	NULL	1	1p36.13	ciliary rootlet coiled-coil, rootletin pseudogene 3	pseudo	CROCCP3	ciliary rootlet coiled-coil, rootletin pseudogene 3	O	NULL	CROCCP3	NO	#N/A
ENSG00000080986	-0.0456857	4.28811	0.221073	0.638223	1	9606	10403	NULL	18	18p11.32	NDC80 kinetochore complex component	protein-coding	NDC80	NDC80 kinetochore complex component	O	NDC80 homolog, kinetochore complex compo	NDC80	NO	#N/A
ENSG00000081014	0.343217	5.15775	9.2859	0.00230925	1	9606	23431	NULL	15	15q21.2	adaptor-related protein complex 4, epsilon 1 subunit	protein-coding	AP4E1	adaptor-related protein complex 4, epsilon 1 subunit	O	AP-4 complex subunit epsilon-1|adaptor-r	AP4E1	NO	#N/A
ENSG00000081019	-0.139793	4.27938	1.91936	0.165928	1	9606	54665	NULL	1	1p13.2	round spermatid basic protein 1	protein-coding	RSBN1	round spermatid basic protein 1	O	NULL	RSBN1	NO	#N/A
ENSG00000081026	-0.165903	4.08949	1.73855	0.187322	1	9606	260425	NULL	1	1p12-p11.2	membrane associated guanylate kinase, WW and PDZ domain containing 3	protein-coding	MAGI3	membrane associated guanylate kinase, WW and PDZ domain containing 3	O	membrane-associated guanylate kinase inv	MAGI3	NO	#N/A
ENSG00000081041	-0.487377	0.974228	4.49925	0.0339098	1	9606	2920	NULL	4	4q21	chemokine (C-X-C motif) ligand 2	protein-coding	CXCL2	chemokine (C-X-C motif) ligand 2	O	C-X-C motif chemokine 2|GRO2 oncogene|MG	CXCL2	NO	#N/A
ENSG00000081059	-0.103536	4.488	1.03851	0.308169	1	9606	6932	NULL	5	5q31.1	transcription factor 7 (T-cell specific, HMG-box)	protein-coding	TCF7	transcription factor 7 (T-cell specific, HMG-box)	O	T-cell-specific transcription factor 1|t	TCF7	NO	#N/A
ENSG00000081087	0.338075	5.55372	17.385	3.05224e-05	0.332115	9606	28962	HSPC019	6	6q21	osteopetrosis associated transmembrane protein 1	protein-coding	OSTM1	osteopetrosis associated transmembrane protein 1	O	GAIP-interacting protein N terminus|chlo	OSTM1	NO	#N/A
ENSG00000081154	0.123447	7.34704	2.57294	0.108706	1	9606	57092	NULL	3	3q12.3	PEST proteolytic signal containing nuclear protein	protein-coding	PCNP	PEST proteolytic signal containing nuclear protein	O	PEST proteolytic signal-containing nucle	PCNP	NO	#N/A
ENSG00000081177	0.184495	4.34146	3.09158	0.0786985	1	9606	55218	NULL	14	14q24.1	exonuclease 3'-5' domain containing 2	protein-coding	EXD2	exonuclease 3'-5' domain containing 2	O	exonuclease 3'-5' domain-containing prot	EXD2	NO	#N/A
ENSG00000081181	0.115223	2.59485	0.609923	0.434817	1	9606	384	NULL	14	14q24.1	arginase 2	protein-coding	ARG2	arginase 2	O	L-arginine amidinohydrolase|L-arginine u	ARG2	NO	#N/A
ENSG00000081189	0.122463	4.36574	0.942644	0.331599	1	9606	4208	NULL	5	5q14	myocyte enhancer factor 2C	protein-coding	MEF2C	myocyte enhancer factor 2C	O	MADS box transcription enhancer factor 2	MEF2C	NO	#N/A
ENSG00000081307	-0.0602142	5.79106	0.555031	0.456269	1	9606	79876	NULL	3	3q22.1	ubiquitin-like modifier activating enzyme 5	protein-coding	UBA5	ubiquitin-like modifier activating enzyme 5	O	UBA5, ubiquitin-activating enzyme E1 hom	UBA5	NO	#N/A
ENSG00000081320	0.409948	5.26194	19.549	9.8051e-06	0.109739	9606	9262	NULL	2	2q32.3	serine/threonine kinase 17b	protein-coding	STK17B	serine/threonine kinase 17b	O	DAP kinase-related apoptosis-inducing pr	STK17B	NO	#N/A
ENSG00000081377	0.300277	5.17386	6.76079	0.00931825	1	9606	8555	RP11-172F4.1	9	9q22.3	cell division cycle 14B	protein-coding	CDC14B	cell division cycle 14B	O	CDC14 cell division cycle 14 homolog B|d	CDC14B	NO	#N/A
ENSG00000081386	-0.32837	3.6557	7.45045	0.00634204	1	9606	22869	RP11-535M15.3	9	9q22.33	zinc finger protein 510	protein-coding	ZNF510	zinc finger protein 510	O	NULL	ZNF510	NO	#N/A
ENSG00000081665	0.363746	3.13069	8.1669	0.00426619	1	9606	440515	NULL	19	19p13.11	zinc finger protein 506	protein-coding	ZNF506	zinc finger protein 506	O	NULL	ZNF506	NO	#N/A
ENSG00000081692	-0.167662	5.2085	3.54488	0.0597294	1	9606	65094	NULL	1	1q42.13	jumonji domain containing 4	protein-coding	JMJD4	jumonji domain containing 4	O	jmjC domain-containing protein 4|jumonji	JMJD4	NO	#N/A
ENSG00000081721	-0.516884	4.94736	24.1491	8.9159e-07	0.0104423	9606	11266	NULL	1	1q21-q22	dual specificity phosphatase 12	protein-coding	DUSP12	dual specificity phosphatase 12	O	YVH1 protein-tyrosine phosphatase orthol	DUSP12	NO	#N/A
ENSG00000081760	0.498859	5.72802	39.6583	3.02514e-10	3.83375e-06	9606	65985	NULL	12	12q24.31	acetoacetyl-CoA synthetase	protein-coding	AACS	acetoacetyl-CoA synthetase	O	acetoacetate-CoA ligase|acyl-CoA synthet	AACS	NO	#N/A
ENSG00000081791	0.063141	5.34947	0.533551	0.465118	1	9606	9812	NULL	5	5q31.3	KIAA0141	protein-coding	KIAA0141	KIAA0141	O	death ligand signal enhancer	KIAA0141	NO	#N/A
ENSG00000081803	-0.212783	5.40594	5.01384	0.0251455	1	9606	93664	NULL	7	7q31.3	Ca++-dependent secretion activator 2	protein-coding	CADPS2	Ca++-dependent secretion activator 2	O	CAPS-2|Ca2+-dependent activator protein	CADPS2	NO	#N/A
ENSG00000081870	0.326905	3.50991	7.95309	0.00480053	1	9606	51668	HSPC034	1	1p32	heat shock protein family B (small), member 11	protein-coding	HSPB11	heat shock protein family B (small), member 11	O	heat shock protein beta-11|intraflagella	HSPB11	NO	#N/A
ENSG00000081913	0.021202	4.93859	0.0388379	0.84377	1	9606	23239	NULL	18	18q21.33	PH domain and leucine rich repeat protein phosphatase 1	protein-coding	PHLPP1	PH domain and leucine rich repeat protein phosphatase 1	O	PH domain leucine-rich repeat-containing	PHLPP1	NO	#N/A
ENSG00000081923	0.836515	5.0788	35.121	3.09843e-09	3.86529e-05	9606	5205	NULL	18	18q21.31	ATPase, aminophospholipid transporter, class I, type 8B, member 1	protein-coding	ATP8B1	ATPase, aminophospholipid transporter, class I, type 8B, member 1	O	ATPase, class I, type 8B, member 1|E1-E2	ATP8B1	NO	#N/A
ENSG00000081985	0.45286	4.16816	19.6635	9.23504e-06	0.103479	9606	3595	RP11-102M16.1	1	1p31.3-p31.2	interleukin 12 receptor, beta 2	protein-coding	IL12RB2	interleukin 12 receptor, beta 2	O	IL-12 receptor subunit beta-2|IL-12R sub	IL12RB2	NO	#N/A
ENSG00000082014	0.522703	2.94538	14.0057	0.000182253	1	9606	6604	NULL	7	7q35-q36	SWI/SNF related, matrix associated, actin dependent regulator of chromatin, subfamily d, member 3	protein-coding	SMARCD3	SWI/SNF related, matrix associated, actin dependent regulator of chromatin, subfamily d, member 3	O	60 kDa BRG-1/Brm-associated factor subun	SMARCD3	NO	#N/A
ENSG00000082068	0.077783	4.62743	0.636163	0.425104	1	9606	55100	NULL	5	5p13.2	WD repeat domain 70	protein-coding	WDR70	WD repeat domain 70	O	WD repeat-containing protein 70	WDR70	NO	#N/A
ENSG00000082126	1.42157	0.87555	32.5066	1.18786e-08	0.00014657	9606	58538	NULL	2	2q33.2	membrane protein, palmitoylated 4 (MAGUK p55 subfamily member 4)	protein-coding	MPP4	membrane protein, palmitoylated 4 (MAGUK p55 subfamily member 4)	O	MAGUK p55 subfamily member 4|amyotrophic	MPP4	UP	MPP4
ENSG00000082146	0.156481	5.62611	2.63623	0.104451	1	9606	55437	PRO1038	2	2q33.1	STE20-related kinase adaptor beta	protein-coding	STRADB	STE20-related kinase adaptor beta	O	ILP-interacting protein ILPIPA|STE20-rel	STRADB	NO	#N/A
ENSG00000082153	-0.358063	9.333	16.5341	4.77831e-05	0.513287	9606	9689	NULL	2	2q33	basic leucine zipper and W2 domains 1	protein-coding	BZW1	basic leucine zipper and W2 domains 1	O	basic leucine zipper and W2 domain-conta	BZW1	NO	#N/A
ENSG00000082212	-0.00387163	5.96308	0.00215507	0.962973	1	9606	4200	NULL	18	18q21	malic enzyme 2, NAD(+)-dependent, mitochondrial	protein-coding	ME2	malic enzyme 2, NAD(+)-dependent, mitochondrial	O	NAD-ME|NAD-dependent malic enzyme, mitoc	ME2	NO	#N/A
ENSG00000082213	0.213647	4.80147	3.78385	0.0517496	1	9606	55322	NULL	5	5p13.3	chromosome 5 open reading frame 22	protein-coding	C5orf22	chromosome 5 open reading frame 22	O	UPF0489 protein C5orf22	C5orf22	NO	#N/A
ENSG00000082258	-0.614846	5.08423	39.8658	2.72023e-10	3.44898e-06	9606	905	NULL	2	2q21.3	cyclin T2	protein-coding	CCNT2	cyclin T2	O	SDS-stable vimentin-bound DNA fragment H	CCNT2	NO	#N/A
ENSG00000082269	0.496696	3.52317	19.1796	1.18978e-05	0.132648	9606	57579	RP1-198I9.1	6	6q13	family with sequence similarity 135, member A	protein-coding	FAM135A	family with sequence similarity 135, member A	O	protein FAM135A	FAM135A	NO	#N/A
ENSG00000082397	-0.0164487	6.26158	0.0243899	0.875897	1	9606	23136	NULL	18	18p11.32	erythrocyte membrane protein band 4.1-like 3	protein-coding	EPB41L3	erythrocyte membrane protein band 4.1-like 3	O	band 4.1-like protein 3|differentially e	EPB41L3	NO	#N/A
ENSG00000082438	0.282044	4.66531	8.06238	0.00451938	1	9606	22837	NULL	2	2q24.3	cordon-bleu WH2 repeat protein-like 1	protein-coding	COBLL1	cordon-bleu WH2 repeat protein-like 1	O	COBL-like 1|cordon-bleu protein-like 1	COBLL1	NO	#N/A
ENSG00000082482	0.264509	3.9755	3.59055	0.0581092	1	9606	3776	NULL	1	1q41	potassium channel, subfamily K, member 2	protein-coding	KCNK2	potassium channel, subfamily K, member 2	O	K2P2.1 potassium channel|TREK-1 K(+) cha	KCNK2	NO	#N/A
ENSG00000082497	0.939496	5.55742	55.0068	1.20111e-13	1.57561e-09	9606	56256	NULL	1	1q32.1-q41	SERTA domain containing 4	protein-coding	SERTAD4	SERTA domain containing 4	O	SERTA domain-containing protein 4	SERTAD4	NO	#N/A
ENSG00000082512	0.530156	5.14635	32.0185	1.5271e-08	0.000188062	9606	7188	RP11-318L16.2	1	1q32	TNF receptor-associated factor 5	protein-coding	TRAF5	TNF receptor-associated factor 5	O	RING finger protein 84	TRAF5	NO	#N/A
ENSG00000082515	-0.0361554	4.59248	0.118847	0.730288	1	9606	29093	HSPC158	5	5q33.2	mitochondrial ribosomal protein L22	protein-coding	MRPL22	mitochondrial ribosomal protein L22	O	39S ribosomal protein L22, mitochondrial	MRPL22	NO	#N/A
ENSG00000082516	0.129281	6.4352	2.68978	0.100994	1	9606	25929	NULL	5	5q33.2	gem (nuclear organelle) associated protein 5	protein-coding	GEMIN5	gem (nuclear organelle) associated protein 5	O	gem-associated protein 5	GEMIN5	NO	#N/A
ENSG00000082641	-0.057443	9.2029	0.776803	0.378121	1	9606	4779	NULL	17	17q21.3	nuclear factor (erythroid-derived 2)-like 1	protein-coding	NFE2L1	nuclear factor (erythroid-derived 2)-like 1	O	NF-E2-related factor 1|NFE2-related fact	NFE2L1	NO	#N/A
ENSG00000082701	-0.000852579	6.87629	7.53746e-05	0.993073	1	9606	2932	NULL	3	3q13.3	glycogen synthase kinase 3 beta	protein-coding	GSK3B	glycogen synthase kinase 3 beta	O	GSK-3 beta|GSK3beta isoform|glycogen syn	GSK3B	NO	#N/A
ENSG00000082781	-0.0902078	8.10663	1.70526	0.191601	1	9606	3693	NULL	3	3q21.2	integrin, beta 5	protein-coding	ITGB5	integrin, beta 5	O	integrin beta-5	ITGB5	NO	#N/A
ENSG00000082805	0.038686	6.71648	0.219091	0.639733	1	9606	23085	NULL	12	12p13.3	ELKS/RAB6-interacting/CAST family member 1	protein-coding	ERC1	ELKS/RAB6-interacting/CAST family member 1	O	ELKS/Rab6-interacting/CAST family member	ERC1	NO	#N/A
ENSG00000082898	-0.108595	8.6903	1.95343	0.162217	1	9606	7514	NULL	2	2p15	exportin 1 (CRM1 homolog, yeast)	protein-coding	XPO1	exportin 1 (CRM1 homolog, yeast)	O	CRM1, yeast, homolog|chromosome region m	XPO1	NO	#N/A
ENSG00000082996	0.118654	5.12601	1.87662	0.170719	1	9606	11342	NULL	3	3q25.1	ring finger protein 13	protein-coding	RNF13	ring finger protein 13	O	E3 ubiquitin-protein ligase RNF13|RING z	RNF13	NO	#N/A
ENSG00000083093	-0.185388	5.07482	2.6159	0.105797	1	9606	79728	NULL	16	16p12.2	partner and localizer of BRCA2	protein-coding	PALB2	partner and localizer of BRCA2	O	NULL	PALB2	NO	#N/A
ENSG00000083097	0.248501	4.15934	4.25842	0.0390562	1	9606	23033	RP1-202D23.2	6	6q15	dopey family member 1	protein-coding	DOPEY1	dopey family member 1	O	homolog of yeast DOP1|protein dopey-1	DOPEY1	NO	#N/A
ENSG00000083099	0.329726	5.75968	13.3608	0.000256934	1	9606	57226	NULL	6	6q15	LYR motif containing 2	protein-coding	LYRM2	LYR motif containing 2	O	LYR motif-containing protein 2	LYRM2	NO	#N/A
ENSG00000083123	0.411118	4.34691	11.373	0.000745207	1	9606	594	RP1-279A18.1	6	6q14.1	branched chain keto acid dehydrogenase E1, beta polypeptide	protein-coding	BCKDHB	branched chain keto acid dehydrogenase E1, beta polypeptide	O	2-oxoisovalerate dehydrogenase beta subu	BCKDHB	NO	#N/A
ENSG00000083168	0.121628	6.85486	0.945724	0.33081	1	9606	7994	NULL	8	8p11	K(lysine) acetyltransferase 6A	protein-coding	KAT6A	K(lysine) acetyltransferase 6A	O	MOZ, YBF2/SAS3, SAS2 and TIP60 protein 3	KAT6A	NO	#N/A
ENSG00000083223	-0.378517	4.78179	11.8528	0.000575751	1	9606	79670	RP11-507D14.3	9	9q21	zinc finger, CCHC domain containing 6	protein-coding	ZCCHC6	zinc finger, CCHC domain containing 6	O	PAP associated domain containing 6|TUTas	ZCCHC6	NO	#N/A
ENSG00000083290	0.386968	2.82403	7.61921	0.00577497	1	9606	9706	NULL	17	17p11.2	unc-51-like kinase 2 (C. elegans)	protein-coding	ULK2	unc-51-like kinase 2 (C. elegans)	O	serine/threonine-protein kinase ULK2	ULK2	NO	#N/A
ENSG00000083312	-0.305244	8.57609	9.58062	0.00196642	1	9606	3842	NULL	5	5q13.2	transportin 1	protein-coding	TNPO1	transportin 1	O	M9 region interaction protein|importin 2	TNPO1	NO	#N/A
ENSG00000083444	-0.293046	7.23953	15.051	0.000104645	1	9606	5351	RP5-1077B9.2	1	1p36.22	procollagen-lysine, 2-oxoglutarate 5-dioxygenase 1	protein-coding	PLOD1	procollagen-lysine, 2-oxoglutarate 5-dioxygenase 1	O	lysine hydroxylase|lysyl hydroxlase 1|pr	PLOD1	NO	#N/A
ENSG00000083454	0.75471	1.41467	13.7243	0.000211698	1	9606	5026	NULL	17	17p13.3	purinergic receptor P2X, ligand-gated ion channel, 5	protein-coding	P2RX5	purinergic receptor P2X, ligand-gated ion channel, 5	O	ATP receptor subunit|P2X purinoceptor 5|	P2RX5	NO	#N/A
ENSG00000083457	-0.544967	2.23377	9.628	0.00191634	1	9606	3682	NULL	17	17p13	integrin, alpha E (antigen CD103, human mucosal lymphocyte antigen 1; alpha polypeptide)	protein-coding	ITGAE	integrin, alpha E (antigen CD103, human mucosal lymphocyte antigen 1; alpha polypeptide)	O	HML-1 antigen|antigen CD103, human mucos	ITGAE	NO	#N/A
ENSG00000083520	0.120399	6.19813	1.5974	0.206272	1	9606	22894	NULL	13	13q22.1	DIS3 mitotic control homolog (S. cerevisiae)	protein-coding	DIS3	DIS3 mitotic control homolog (S. cerevisiae)	O	2810028N01Rik|exosome complex exonucleas	DIS3	NO	#N/A
ENSG00000083535	0.169784	4.4974	2.85747	0.0909505	1	9606	10464	NULL	13	13q22.1	progesterone immunomodulatory binding factor 1	protein-coding	PIBF1	progesterone immunomodulatory binding factor 1	O	progesterone-induced blocking factor 1|p	PIBF1	NO	#N/A
ENSG00000083544	-0.589107	2.71475	9.24406	0.00236261	1	9606	81550	RP11-459E2.1	13	13q21.2	tudor domain containing 3	protein-coding	TDRD3	tudor domain containing 3	O	tudor domain-containing protein 3	TDRD3	NO	#N/A
ENSG00000083635	0.0348812	4.30565	0.119847	0.7292	1	9606	26747	NULL	13	13q14	nuclear fragile X mental retardation protein interacting protein 1	protein-coding	NUFIP1	nuclear fragile X mental retardation protein interacting protein 1	O	nuclear FMRP-interacting protein 1|nucle	NUFIP1	NO	#N/A
ENSG00000083642	-0.116553	4.96334	1.08542	0.297488	1	9606	23047	RP1-267P19.1	13	13q12.3	PDS5, regulator of cohesion maintenance, homolog B (S. cerevisiae)	protein-coding	PDS5B	PDS5, regulator of cohesion maintenance, homolog B (S. cerevisiae)	O	androgen induced inhibitor of proliferat	PDS5B	NO	#N/A
ENSG00000083720	0.33185	5.87725	13.7776	0.000205772	1	9606	5019	NULL	5	5p13.1	3-oxoacid CoA transferase 1	protein-coding	OXCT1	3-oxoacid CoA transferase 1	O	3-oxoacid CoA-transferase 1|3-oxoacid-Co	OXCT1	NO	#N/A
ENSG00000083750	0.00416631	2.37813	0.000672911	0.979305	1	9606	10325	RP11-465E19.1	X	Xp11.21	Ras-related GTP binding B	protein-coding	RRAGB	Ras-related GTP binding B	O	GTP-binding protein ragB|rag B|ras-relat	RRAGB	NO	#N/A
ENSG00000083799	0.589816	6.01728	55.1831	1.09809e-13	1.4408e-09	9606	1540	HSPC057	16	16q12.1	cylindromatosis (turban tumor syndrome)	protein-coding	CYLD	cylindromatosis (turban tumor syndrome)	O	deubiquitinating enzyme CYLD|probable ub	CYLD	NO	#N/A
ENSG00000083807	-0.167951	0.907611	0.518326	0.471557	1	9606	10998	NULL	19	19q13.43	solute carrier family 27 (fatty acid transporter), member 5	protein-coding	SLC27A5	solute carrier family 27 (fatty acid transporter), member 5	O	BA-CoA ligase|VLACS-related|bile acid-Co	SLC27A5	NO	#N/A
ENSG00000083812	-0.0575772	3.93215	0.279897	0.596769	1	9606	25799	NULL	19	19q13.43	zinc finger protein 324	protein-coding	ZNF324	zinc finger protein 324	O	zinc finger protein 324A|zinc finger pro	ZNF324	NO	#N/A
ENSG00000083817	-0.619628	2.52359	16.392	5.15014e-05	0.551889	9606	55659	NULL	19	19q13.4	zinc finger protein 416	protein-coding	ZNF416	zinc finger protein 416	O	NULL	ZNF416	NO	#N/A
ENSG00000083828	0.390497	3.05708	8.62622	0.00331359	1	9606	54807	NULL	19	19q13.43	zinc finger protein 586	protein-coding	ZNF586	zinc finger protein 586	O	NULL	ZNF586	NO	#N/A
ENSG00000083838	-0.798687	2.93952	35.4626	2.60001e-09	3.24975e-05	9606	55663	NULL	19	19q13.43	zinc finger protein 446	protein-coding	ZNF446	zinc finger protein 446	O	zinc finger protein with KRAB and SCAN d	ZNF446	NO	#N/A
ENSG00000083844	0.255846	4.13006	6.20902	0.0127101	1	9606	9422	NULL	19	19q13.4	zinc finger protein 264	protein-coding	ZNF264	zinc finger protein 264	O	NULL	ZNF264	NO	#N/A
ENSG00000083845	-0.0254915	9.24467	0.113685	0.735988	1	9606	6193	NULL	19	19q13.4	ribosomal protein S5	protein-coding	RPS5	ribosomal protein S5	O	40S ribosomal protein S5	RPS5	NO	#N/A
ENSG00000083857	-0.116565	7.85079	0.945897	0.330766	1	9606	2195	NULL	4	4q35	FAT tumor suppressor homolog 1 (Drosophila)	protein-coding	FAT1	FAT tumor suppressor homolog 1 (Drosophila)	O	FAT tumor suppressor 1|cadherin ME5|cadh	FAT1	NO	#N/A
ENSG00000083896	-0.16589	6.5007	5.59859	0.017975	1	9606	91746	NULL	4	4q13.2	YTH domain containing 1	protein-coding	YTHDC1	YTH domain containing 1	O	YTH domain-containing protein 1|putative	YTHDC1	NO	#N/A
ENSG00000083937	0.168548	5.96254	3.4829	0.0620062	1	9606	25978	CGI-84	3	3p11.2	charged multivesicular body protein 2B	protein-coding	CHMP2B	charged multivesicular body protein 2B	O	VPS2 homolog B|charged multivesicular bo	CHMP2B	NO	#N/A
ENSG00000084070	0.0529867	5.82286	0.483448	0.486865	1	9606	64744	NULL	1	1p35.3-p34.1	small ArfGAP2	protein-coding	SMAP2	small ArfGAP2	O	stromal membrane-associated GTPase-activ	SMAP2	NO	#N/A
ENSG00000084072	-0.0197134	5.86233	0.0641925	0.799988	1	9606	10450	RP1-118J21.1	1	1p32	peptidylprolyl isomerase E (cyclophilin E)	protein-coding	PPIE	peptidylprolyl isomerase E (cyclophilin E)	O	PPIase E|cyclophilin-33|peptidyl-prolyl	PPIE	NO	#N/A
ENSG00000084073	0.0581599	6.79698	0.36457	0.545979	1	9606	10269	NULL	1	1p34	zinc metallopeptidase STE24	protein-coding	ZMPSTE24	zinc metallopeptidase STE24	O	CAAX prenyl protease 1 homolog|farnesyla	ZMPSTE24	NO	#N/A
ENSG00000084090	-0.103952	8.15736	2.42002	0.119794	1	9606	56910	NULL	2	2q11.2	StAR-related lipid transfer (START) domain containing 7	protein-coding	STARD7	StAR-related lipid transfer (START) domain containing 7	O	START domain containing 7|START domain-c	STARD7	NO	#N/A
ENSG00000084092	0.0315621	5.25191	0.139288	0.70899	1	9606	84273	NULL	4	4q12	nitric oxide associated 1	protein-coding	NOA1	nitric oxide associated 1	O	nitric oxide associated-1|nitric oxide s	NOA1	NO	#N/A
ENSG00000084093	-0.0707152	5.46198	0.410957	0.521484	1	9606	5978	NULL	4	4q12	RE1-silencing transcription factor	protein-coding	REST	RE1-silencing transcription factor	O	neural-restrictive silencer factor|neuro	REST	NO	#N/A
ENSG00000084112	-0.00124095	7.05239	0.000198186	0.988768	1	9606	54434	NULL	12	12q24.11	slingshot protein phosphatase 1	protein-coding	SSH1	slingshot protein phosphatase 1	O	SSH-like protein 1|hSSH-1L|protein phosp	SSH1	NO	#N/A
ENSG00000084207	-0.252145	8.30027	9.70332	0.00183935	1	9606	2950	NULL	11	11q13	glutathione S-transferase pi 1	protein-coding	GSTP1	glutathione S-transferase pi 1	O	GST class-pi|GSTP1-1|deafness, X-linked	GSTP1	NO	#N/A
ENSG00000084234	0.0652583	10.5083	1.23883	0.265697	1	9606	334	NULL	11	11q24	amyloid beta (A4) precursor-like protein 2	protein-coding	APLP2	amyloid beta (A4) precursor-like protein 2	O	CDEI box-binding protein|amyloid precurs	APLP2	NO	#N/A
ENSG00000084444	0.42786	3.36194	11.5907	0.000662839	1	9606	57613	NULL	12	12p13.1	KIAA1467	protein-coding	KIAA1467	KIAA1467	O	uncharacterized protein KIAA1467	KIAA1467	NO	#N/A
ENSG00000084463	-0.173807	7.80139	4.06176	0.0438648	1	9606	51729	NULL	12	12p12.3	WW domain binding protein 11	protein-coding	WBP11	WW domain binding protein 11	O	Npw38-binding protein NpwBP|SH3 domain-b	WBP11	NO	#N/A
ENSG00000084623	-0.121537	8.15764	2.68742	0.101144	1	9606	8668	RP4-675E8.1	1	1p34.1	eukaryotic translation initiation factor 3, subunit I	protein-coding	EIF3I	eukaryotic translation initiation factor 3, subunit I	O	TGF-beta receptor-interacting protein 1|	EIF3I	NO	#N/A
ENSG00000084636	1.02223	3.29781	38.165	6.50086e-10	8.19564e-06	9606	1307	FP1572	1	1p35-p34	collagen, type XVI, alpha 1	protein-coding	COL16A1	collagen, type XVI, alpha 1	O	alpha 1 type XVI collagen|collagen XVI,	COL16A1	UP	COL16A1
ENSG00000084652	0.079715	7.03403	1.40714	0.235531	1	9606	200081	NULL	1	1p35.1	taxilin alpha	protein-coding	TXLNA	taxilin alpha	O	alpha-taxilin|interleukin 14	TXLNA	NO	#N/A
ENSG00000084676	0.130971	4.89525	1.25819	0.261994	1	9606	8648	NULL	2	2p23	nuclear receptor coactivator 1	protein-coding	NCOA1	nuclear receptor coactivator 1	O	Hin-2 protein|PAX3/NCOA1 fusion protein|	NCOA1	NO	#N/A
ENSG00000084693	0.318512	5.21337	14.6142	0.00013192	1	9606	60509	NULL	2	2p23.3	ATP/GTP binding protein-like 5	protein-coding	AGBL5	ATP/GTP binding protein-like 5	O	ATP/GTP-binding protein-like 5|cytosolic	AGBL5	NO	#N/A
ENSG00000084710	0.634799	2.60407	18.9339	1.35324e-05	0.150439	9606	22979	NULL	2	2p23.3	EFR3 homolog B (S. cerevisiae)	protein-coding	EFR3B	EFR3 homolog B (S. cerevisiae)	O	protein EFR3 homolog B	EFR3B	NO	#N/A
ENSG00000084731	-0.0920687	4.63782	1.00317	0.316545	1	9606	3797	NULL	2	2p23	kinesin family member 3C	protein-coding	KIF3C	kinesin family member 3C	O	KIF3C variant protein|kinesin-like prote	KIF3C	NO	#N/A
ENSG00000084733	-0.223635	7.3201	8.58878	0.0033824	1	9606	10890	NULL	2	2p23.3	RAB10, member RAS oncogene family	protein-coding	RAB10	RAB10, member RAS oncogene family	O	GTP-binding protein RAB10|ras-related GT	RAB10	NO	#N/A
ENSG00000084754	-0.000600887	7.5537	8.63695e-05	0.992585	1	9606	3030	NULL	2	2p23	hydroxyacyl-CoA dehydrogenase/3-ketoacyl-CoA thiolase/enoyl-CoA hydratase (trifunctional protein), alpha subunit	protein-coding	HADHA	hydroxyacyl-CoA dehydrogenase/3-ketoacyl-CoA thiolase/enoyl-CoA hydratase (trifunctional protein), alpha subunit	O	3-ketoacyl-Coenzyme A (CoA) thiolase, al	HADHA	NO	#N/A
ENSG00000084764	-0.0961168	5.02068	1.23039	0.267331	1	9606	22924	NULL	2	2p23.3-p23.1	microtubule-associated protein, RP/EB family, member 3	protein-coding	MAPRE3	microtubule-associated protein, RP/EB family, member 3	O	APC binding protein|EB1 protein family m	MAPRE3	NO	#N/A
ENSG00000084774	0.15116	7.47332	5.32194	0.0210585	1	9606	790	NULL	2	2p22-p21	carbamoyl-phosphate synthetase 2, aspartate transcarbamylase, and dihydroorotase	protein-coding	CAD	carbamoyl-phosphate synthetase 2, aspartate transcarbamylase, and dihydroorotase	O	CAD protein|CAD trifunctional protein|mu	CAD	NO	#N/A
ENSG00000085063	-0.383249	9.42666	38.5674	5.28949e-10	6.67533e-06	9606	966	NULL	11	11p13	CD59 molecule, complement regulatory protein	protein-coding	CD59	CD59 molecule, complement regulatory protein	O	1F5 antigen|20 kDa homologous restrictio	CD59	NO	#N/A
ENSG00000085117	-0.412759	2.31061	5.56853	0.0182861	1	9606	3732	NULL	11	11p11.2	CD82 molecule	protein-coding	CD82	CD82 molecule	O	C33 antigen|CD82 antigen|inducible membr	CD82	NO	#N/A
ENSG00000085185	0.058183	4.91733	0.343148	0.558018	1	9606	63035	RP3-510O21.1	X	Xq25-q26.1	BCL6 corepressor-like 1	protein-coding	BCORL1	BCL6 corepressor-like 1	O	BCL-6 corepressor-like protein 1|BCoR-li	BCORL1	NO	#N/A
ENSG00000085224	-0.198275	6.72854	3.42951	0.0640411	1	9606	546	RP5-875J14.1	X	Xq21.1	alpha thalassemia/mental retardation syndrome X-linked	protein-coding	ATRX	alpha thalassemia/mental retardation syndrome X-linked	O	ATP-dependent helicase ATRX|DNA dependen	ATRX	NO	#N/A
ENSG00000085231	-0.014684	4.83386	0.019491	0.888968	1	#N/A	#N/A	#N/A	#N/A	#N/A	#N/A	#N/A	#N/A	#N/A	#N/A	#N/A	AK6	NO	#N/A
ENSG00000085274	0.462997	5.03317	28.9449	7.44662e-08	0.000901563	9606	55892	SBBIZ1	3	3q26.2	myoneurin	protein-coding	MYNN	myoneurin	O	zinc finger and BTB domain-containing pr	MYNN	NO	#N/A
ENSG00000085365	0.302315	5.89857	10.9471	0.000937487	1	9606	9522	NULL	5	5q14.1	secretory carrier membrane protein 1	protein-coding	SCAMP1	secretory carrier membrane protein 1	O	secretory carrier-associated membrane pr	SCAMP1	NO	#N/A
ENSG00000085377	-0.212455	5.60173	7.70816	0.00549716	1	9606	5550	RP3-355L5.1	6	6q22	prolyl endopeptidase	protein-coding	PREP	prolyl endopeptidase	O	dJ355L5.1 (prolyl endopeptidase)|post-pr	PREP	NO	#N/A
ENSG00000085382	0.217379	3.79303	4.05323	0.0440868	1	9606	57531	NULL	6	6q16.3	HECT domain and ankyrin repeat containing E3 ubiquitin protein ligase 1	protein-coding	HACE1	HECT domain and ankyrin repeat containing E3 ubiquitin protein ligase 1	O	E3 ubiquitin-protein ligase HACE1|HECT d	HACE1	NO	#N/A
ENSG00000085415	0.0217118	5.82114	0.0785098	0.779327	1	9606	81929	NULL	18	18p11.21	SEH1-like (S. cerevisiae)	protein-coding	SEH1L	SEH1-like (S. cerevisiae)	O	nucleoporin SEH1|nup107-160 subcomplex s	SEH1L	NO	#N/A
ENSG00000085433	0.298356	4.50765	7.88739	0.00497805	1	9606	22911	NULL	1	1p13.3	WD repeat domain 47	protein-coding	WDR47	WD repeat domain 47	O	WD repeat-containing protein 47|nemitin|	WDR47	NO	#N/A
ENSG00000085449	0.427994	6.06776	22.7949	1.80241e-06	0.0208665	9606	57590	NULL	2	2q36.1	WD repeat and FYVE domain containing 1	protein-coding	WDFY1	WD repeat and FYVE domain containing 1	O	WD repeat and FYVE domain-containing pro	WDFY1	NO	#N/A
ENSG00000085491	0.0589437	5.63375	0.462844	0.496298	1	9606	29957	RP11-356N1.3	1	1p13.3	solute carrier family 25 (mitochondrial carrier; phosphate carrier), member 24	protein-coding	SLC25A24	solute carrier family 25 (mitochondrial carrier; phosphate carrier), member 24	O	calcium-binding mitochondrial carrier pr	SLC25A24	NO	#N/A
ENSG00000085511	-0.173239	5.35192	3.93223	0.0473691	1	9606	4216	RP3-473J16.4	6	6q26	mitogen-activated protein kinase kinase kinase 4	protein-coding	MAP3K4	mitogen-activated protein kinase kinase kinase 4	O	MAP three kinase 1|MAP/ERK kinase kinase	MAP3K4	NO	#N/A
ENSG00000085563	0.501554	3.88816	22.6283	1.96568e-06	0.0227253	9606	5243	NULL	7	7q21.12	ATP-binding cassette, sub-family B (MDR/TAP), member 1	protein-coding	ABCB1	ATP-binding cassette, sub-family B (MDR/TAP), member 1	O	P-glycoprotein 1|colchicin sensitivity|d	ABCB1	NO	#N/A
ENSG00000085644	-0.20056	4.82231	4.33694	0.0372938	1	9606	7760	NULL	16	16p13.3	zinc finger protein 213	protein-coding	ZNF213	zinc finger protein 213	O	putative transcription factor CR53|zinc	ZNF213	NO	#N/A
ENSG00000085662	-0.0901186	7.83982	1.23223	0.266973	1	9606	231	NULL	7	7q35	aldo-keto reductase family 1, member B1 (aldose reductase)	protein-coding	AKR1B1	aldo-keto reductase family 1, member B1 (aldose reductase)	O	Lii5-2 CTCL tumor antigen|aldehyde reduc	AKR1B1	NO	#N/A
ENSG00000085719	0.181072	6.26782	2.84845	0.0914618	1	9606	8895	NULL	8	8q21.3	copine III	protein-coding	CPNE3	copine III	O	copine-3	CPNE3	NO	#N/A
ENSG00000085721	0.19066	6.86459	5.33914	0.0208518	1	9606	54700	NULL	16	16p12	RRN3 RNA polymerase I transcription factor homolog (S. cerevisiae)	protein-coding	RRN3	RRN3 RNA polymerase I transcription factor homolog (S. cerevisiae)	O	RNA polymerase I-specific transcription	RRN3	NO	#N/A
ENSG00000085733	-0.0353591	8.60855	0.228083	0.632949	1	9606	2017	NULL	11	11q13	cortactin	protein-coding	CTTN	cortactin	O	1110020L01Rik|amplaxin|ems1 sequence (ma	CTTN	NO	#N/A
ENSG00000085760	0.290181	5.84177	14.5834	0.000134089	1	9606	4528	NULL	2	2p16.1	mitochondrial translational initiation factor 2	protein-coding	MTIF2	mitochondrial translational initiation factor 2	O	IF-2(Mt)|IF-2mt|IF2(mt)|translation init	MTIF2	NO	#N/A
ENSG00000085788	-0.104915	4.93892	1.18679	0.275979	1	9606	23259	NULL	8	8p11.23	DDHD domain containing 2	protein-coding	DDHD2	DDHD domain containing 2	O	DDHD domain-containing protein 2|PA-PLA1	DDHD2	NO	#N/A
ENSG00000085831	0.40881	0.772534	2.77407	0.0958025	1	9606	22996	NULL	1	1p32.3	tetratricopeptide repeat domain 39A	protein-coding	TTC39A	tetratricopeptide repeat domain 39A	O	TPR repeat protein 39A|differentially ex	TTC39A	NO	#N/A
ENSG00000085832	0.387613	5.52612	17.628	2.68609e-05	0.293237	9606	2060	NULL	1	1p32	epidermal growth factor receptor pathway substrate 15	protein-coding	EPS15	epidermal growth factor receptor pathway substrate 15	O	ALL1 fused gene from chromosome 1|epider	EPS15	NO	#N/A
ENSG00000085840	-0.578786	4.48812	38.7948	4.70784e-10	5.94883e-06	9606	4998	NULL	1	1p32	origin recognition complex, subunit 1	protein-coding	ORC1	origin recognition complex, subunit 1	O	origin recognition complex subunit 1|ori	ORC1	NO	#N/A
ENSG00000085871	0.170088	1.7664	0.848213	0.357058	1	9606	4258	NULL	4	4q28.3	microsomal glutathione S-transferase 2	protein-coding	MGST2	microsomal glutathione S-transferase 2	O	microsomal GST-2|microsomal GST-II	MGST2	NO	#N/A
ENSG00000085872	-0.332827	7.17103	21.7482	3.10885e-06	0.035643	9606	10523	NULL	19	19p13.1	calcium homeostasis endoplasmic reticulum protein	protein-coding	CHERP	calcium homeostasis endoplasmic reticulum protein	O	ERPROT 213-21|ERPROT213-21|SR-related CT	CHERP	NO	#N/A
ENSG00000085978	-0.288185	6.1745	14.4932	0.000140669	1	9606	55054	hCG_1817841	2	2q37.1	autophagy related 16-like 1 (S. cerevisiae)	protein-coding	ATG16L1	autophagy related 16-like 1 (S. cerevisiae)	O	APG16L beta|ATG16 autophagy related 16-l	ATG16L1	NO	#N/A
ENSG00000085982	0.183237	6.21678	4.47931	0.0343075	1	9606	55230	NULL	2	2q37.1	ubiquitin specific peptidase 40	protein-coding	USP40	ubiquitin specific peptidase 40	O	deubiquitinating enzyme 40|ubiquitin car	USP40	NO	#N/A
ENSG00000085998	-0.166117	5.95508	2.98555	0.0840109	1	9606	55624	RP11-322N21.3	1	1p34.1	protein O-linked mannose beta1,2-N-acetylglucosaminyltransferase	protein-coding	POMGNT1	protein O-linked mannose beta1,2-N-acetylglucosaminyltransferase	O	UDP-GlcNAc:alpha-D-mannoside beta-1,2-N-	POMGNT1	NO	#N/A
ENSG00000085999	-0.842129	4.69328	59.0777	1.51568e-14	2.0007e-10	9606	8438	NULL	1	1p32	RAD54-like (S. cerevisiae)	protein-coding	RAD54L	RAD54-like (S. cerevisiae)	O	DNA repair and recombination protein RAD	RAD54L	NO	#N/A
ENSG00000086015	0.0895577	6.14639	1.3613	0.243312	1	9606	23139	RP4-533D7.1	1	1p34.1	microtubule associated serine/threonine kinase 2	protein-coding	MAST2	microtubule associated serine/threonine kinase 2	O	microtubule associated testis specific s	MAST2	NO	#N/A
ENSG00000086061	-0.691482	7.48331	109.823	1.07154e-25	1.46479e-21	9606	3301	RP11-54K16.1	9	9p13.3	DnaJ (Hsp40) homolog, subfamily A, member 1	protein-coding	DNAJA1	DnaJ (Hsp40) homolog, subfamily A, member 1	O	HSJ-2|dnaJ homolog subfamily A member 1|	DNAJA1	NO	#N/A
ENSG00000086062	0.139571	6.77812	3.70084	0.0543851	1	9606	2683	NULL	9	9p13	UDP-Gal:betaGlcNAc beta 1,4- galactosyltransferase, polypeptide 1	protein-coding	B4GALT1	UDP-Gal:betaGlcNAc beta 1,4- galactosyltransferase, polypeptide 1	O	UDP-Gal:beta-GlcNAc beta-1,4-galactosylt	B4GALT1	NO	#N/A
ENSG00000086065	0.0547627	5.70627	0.484051	0.486593	1	9606	51510	CGI-34	9	9p13.3	charged multivesicular body protein 5	protein-coding	CHMP5	charged multivesicular body protein 5	O	SNF7 domain containing 2|SNF7 domain-con	CHMP5	NO	#N/A
ENSG00000086102	0.408918	5.46676	17.0923	3.56066e-05	0.385833	9606	4799	NULL	9	9p13.3	nuclear transcription factor, X-box binding 1	protein-coding	NFX1	nuclear transcription factor, X-box binding 1	O	nuclear transcription factor, X box-bind	NFX1	NO	#N/A
ENSG00000086189	0.152469	5.84883	3.33956	0.0676326	1	9606	27292	HUSSY-05	5	5q12.1	DIM1 dimethyladenosine transferase 1 homolog (S. cerevisiae)	protein-coding	DIMT1	DIM1 dimethyladenosine transferase 1 homolog (S. cerevisiae)	O	18S rRNA (adenine(1779)-N(6)/adenine(178	DIMT1	NO	#N/A
ENSG00000086200	0.0561744	5.59379	0.321186	0.570896	1	9606	51194	NULL	5	5q12.1	importin 11	protein-coding	IPO11	importin 11	O	Ran binding protein 11|imp11|importin-11	IPO11	NO	#N/A
ENSG00000086205	0.141794	1.89759	0.583729	0.444855	1	9606	2346	GIG27	11	11p11.2	folate hydrolase (prostate-specific membrane antigen) 1	protein-coding	FOLH1	folate hydrolase (prostate-specific membrane antigen) 1	O	N-acetylated alpha-linked acidic dipepti	FOLH1	NO	#N/A
ENSG00000086232	0.114178	8.44134	2.97613	0.084501	1	9606	27102	PRO1362	7	7p22	eukaryotic translation initiation factor 2-alpha kinase 1	protein-coding	EIF2AK1	eukaryotic translation initiation factor 2-alpha kinase 1	O	heme regulated initiation factor 2 alpha	EIF2AK1	NO	#N/A
ENSG00000086289	0.0954261	6.67025	1.76147	0.184441	1	9606	54749	NULL	7	7p14.1	ependymin related protein 1 (zebrafish)	protein-coding	EPDR1	ependymin related protein 1 (zebrafish)	O	mammalian ependymin related protein 1|ma	EPDR1	NO	#N/A
ENSG00000086300	0.141746	3.86431	1.41027	0.235011	1	9606	29887	NULL	7	7p15.2	sorting nexin 10	protein-coding	SNX10	sorting nexin 10	O	sorting nexin-10	SNX10	NO	#N/A
ENSG00000086475	-0.305838	6.32841	15.4746	8.36234e-05	0.883899	9606	22929	RP11-24J20.2	10	10p14	selenophosphate synthetase 1	protein-coding	SEPHS1	selenophosphate synthetase 1	O	selenide, water dikinase 1|selenium dono	SEPHS1	NO	#N/A
ENSG00000086504	-0.593283	5.9738	20.7748	5.16569e-06	0.0586668	9606	10573	Z97634.1-001	16	16p13.3	mitochondrial ribosomal protein L28	protein-coding	MRPL28	mitochondrial ribosomal protein L28	O	39S ribosomal protein L28, mitochondrial	MRPL28	NO	#N/A
ENSG00000086544	-0.243069	3.08344	1.9601	0.161503	1	9606	80271	NULL	19	19q13.1	inositol-trisphosphate 3-kinase C	protein-coding	ITPKC	inositol-trisphosphate 3-kinase C	O	IP3 3-kinase C|IP3K C|InsP 3 kinase C|in	ITPKC	NO	#N/A
ENSG00000086589	0.22404	5.9166	8.89992	0.00285183	1	9606	55696	199G4	5	5q33.1	RNA binding motif protein 22	protein-coding	RBM22	RNA binding motif protein 22	O	RNA-binding motif protein 22|functional	RBM22	NO	#N/A
ENSG00000086598	-0.118747	8.14228	3.65112	0.0560316	1	9606	10959	NULL	12	12q24.31	transmembrane emp24 domain trafficking protein 2	protein-coding	TMED2	transmembrane emp24 domain trafficking protein 2	O	coated vesicle membrane protein|membrane	TMED2	NO	#N/A
ENSG00000086619	0.151154	2.87814	1.28359	0.257232	1	9606	56605	RP5-985L19.2	1	1q42.2-q43	ERO1-like beta (S. cerevisiae)	protein-coding	ERO1LB	ERO1-like beta (S. cerevisiae)	O	ERO1-L-beta|ERO1-like protein beta|endop	ERO1LB	NO	#N/A
ENSG00000086666	0.177116	5.96832	4.18607	0.0407574	1	9606	54469	HT032	15	15q25.1	zinc finger, AN1-type domain 6	protein-coding	ZFAND6	zinc finger, AN1-type domain 6	O	AN1-type zinc finger protein 6|protein a	ZFAND6	NO	#N/A
ENSG00000086712	0.0868723	6.10503	0.95037	0.329625	1	9606	55787	RP11-716A19.4	X	Xp22.2	taxilin gamma	protein-coding	TXLNG	taxilin gamma	O	environmental LPS-responding|environment	TXLNG	NO	#N/A
ENSG00000086717	0.0313332	0.277252	0.012026	0.912677	1	9606	5475	RP3-499B10.1	X	Xp22	protein phosphatase, EF-hand calcium binding domain 1	protein-coding	PPEF1	protein phosphatase, EF-hand calcium binding domain 1	O	protein phosphatase 7, catalytic subunit	PPEF1	NO	#N/A
ENSG00000086730	0.751861	2.67556	27.0282	2.00506e-07	0.00239645	9606	7462	HSPC046	7	7q11.23	linker for activation of T cells family, member 2	protein-coding	LAT2	linker for activation of T cells family, member 2	O	Williams-Beuren syndrome chromosomal reg	LAT2	NO	#N/A
ENSG00000086758	-0.32236	8.50862	9.21227	0.00240398	1	9606	10075	RP3-339A18.4	X	Xp11.22	HECT, UBA and WWE domain containing 1, E3 ubiquitin protein ligase	protein-coding	HUWE1	HECT, UBA and WWE domain containing 1, E3 ubiquitin protein ligase	O	ARF-binding protein 1|BJ-HCC-24 tumor an	HUWE1	NO	#N/A
ENSG00000086827	-0.110225	5.59954	1.83175	0.175921	1	9606	9183	NULL	11	11q23.2	zw10 kinetochore protein	protein-coding	ZW10	zw10 kinetochore protein	O	ZW10 homolog, centromere/kinetochore pro	ZW10	NO	#N/A
ENSG00000086848	-0.0248517	5.06056	0.0623359	0.802841	1	9606	79796	NULL	11	11q23	ALG9, alpha-1,2-mannosyltransferase	protein-coding	ALG9	ALG9, alpha-1,2-mannosyltransferase	O	alpha-1,2-mannosyltransferase ALG9|aspar	ALG9	NO	#N/A
ENSG00000086991	-0.324743	0.53247	1.51769	0.21797	1	9606	50507	NULL	11	11q14.2-q21	NADPH oxidase 4	protein-coding	NOX4	NADPH oxidase 4	O	kidney oxidase-1|kidney superoxide-produ	NOX4	NO	#N/A
ENSG00000087008	-0.244212	4.26242	6.2368	0.0125122	1	9606	8310	NULL	4	4p15.3	acyl-CoA oxidase 3, pristanoyl	protein-coding	ACOX3	acyl-CoA oxidase 3, pristanoyl	O	BRCACox|acyl-Coenzyme A oxidase 3, prist	ACOX3	NO	#N/A
ENSG00000087053	-0.0652379	6.72548	0.456748	0.499148	1	9606	8898	NULL	11	11q22	myotubularin related protein 2	protein-coding	MTMR2	myotubularin related protein 2	O	myotubularin-related protein 2	MTMR2	NO	#N/A
ENSG00000087074	0.846469	6.78947	84.2989	4.25356e-20	5.7457e-16	9606	23645	NULL	19	19q13.2	protein phosphatase 1, regulatory subunit 15A	protein-coding	PPP1R15A	protein phosphatase 1, regulatory subunit 15A	O	growth arrest and DNA damage-inducible p	PPP1R15A	NO	#N/A
ENSG00000087076	0.0212191	2.22904	0.0160754	0.899108	1	9606	51171	UNQ502/PRO474	19	19q13.33	hydroxysteroid (17-beta) dehydrogenase 14	protein-coding	HSD17B14	hydroxysteroid (17-beta) dehydrogenase 14	O	17-beta-HSD 14|17-beta-hydroxysteroid de	HSD17B14	NO	#N/A
ENSG00000087077	-0.224876	7.03466	3.04144	0.0811638	1	9606	7205	tcag7.1300	7	7q22	thyroid hormone receptor interactor 6	protein-coding	TRIP6	thyroid hormone receptor interactor 6	O	OPA-interacting protein 1|TR-interacting	TRIP6	NO	#N/A
ENSG00000087086	0.264332	12.1644	13.409	0.000250421	1	9606	2512	NULL	19	19q13.33	ferritin, light polypeptide	protein-coding	FTL	ferritin, light polypeptide	O	ferritin L subunit|ferritin L-chain|ferr	FTL	NO	#N/A
ENSG00000087087	-0.0122539	7.93093	0.0277639	0.867665	1	9606	51593	NULL	7	7q21	serrate RNA effector molecule homolog (Arabidopsis)	protein-coding	SRRT	serrate RNA effector molecule homolog (Arabidopsis)	O	arsenate resistance protein 2|arsenate r	SRRT	NO	#N/A
ENSG00000087088	-0.0307117	5.72232	0.0557478	0.813348	1	9606	581	NULL	19	19q13.3-q13.4	BCL2-associated X protein	protein-coding	BAX	BCL2-associated X protein	O	BCL2-associated X protein omega|BCL2-ass	BAX	NO	#N/A
ENSG00000087095	0.380563	3.92711	11.8875	0.000565118	1	9606	51701	NULL	17	17q11.2	nemo-like kinase	protein-coding	NLK	nemo-like kinase	O	serine/threonine-protein kinase NLK	NLK	NO	#N/A
ENSG00000087111	-0.3951	4.93356	18.6966	1.53259e-05	0.169795	9606	94005	UNQ1873/PRO4316	17	17p13.2	phosphatidylinositol glycan anchor biosynthesis, class S	protein-coding	PIGS	phosphatidylinositol glycan anchor biosynthesis, class S	O	GPI transamidase component PIG-S|GPI tra	PIGS	NO	#N/A
ENSG00000087116	-0.783549	2.37326	16.1112	5.9729e-05	0.637846	9606	9509	NULL	5	5qter	ADAM metallopeptidase with thrombospondin type 1 motif, 2	protein-coding	ADAMTS2	ADAM metallopeptidase with thrombospondin type 1 motif, 2	O	A disintegrin and metalloproteinase with	ADAMTS2	NO	#N/A
ENSG00000087152	-0.178868	7.54751	3.97056	0.0463024	1	9606	56970	NULL	17	17q21.31	ataxin 7-like 3	protein-coding	ATXN7L3	ataxin 7-like 3	O	SAGA-associated factor 11 homolog|ataxin	ATXN7L3	NO	#N/A
ENSG00000087157	-0.042445	6.16877	0.171211	0.679037	1	9606	9489	NULL	17	17q25.3	phosphatidylglycerophosphate synthase 1	protein-coding	PGS1	phosphatidylglycerophosphate synthase 1	O	CDP-diacylglycerol--glycerol-3-phosphate	PGS1	NO	#N/A
ENSG00000087191	-0.237528	7.99084	5.82625	0.0157887	1	9606	5705	NULL	17	17q23.3	proteasome (prosome, macropain) 26S subunit, ATPase, 5	protein-coding	PSMC5	proteasome (prosome, macropain) 26S subunit, ATPase, 5	O	26S protease regulatory subunit 8|26S pr	PSMC5	NO	#N/A
ENSG00000087206	0.0926426	4.95907	1.16735	0.279946	1	9606	51720	NULL	5	5q35.2	ubiquitin interaction motif containing 1	protein-coding	UIMC1	ubiquitin interaction motif containing 1	O	BRCA1-A complex subunit RAP80|receptor a	UIMC1	NO	#N/A
ENSG00000087245	0.312434	9.72957	21.7417	3.11941e-06	0.0357609	9606	4313	NULL	16	16q13-q21	matrix metallopeptidase 2 (gelatinase A, 72kDa gelatinase, 72kDa type IV collagenase)	protein-coding	MMP2	matrix metallopeptidase 2 (gelatinase A, 72kDa gelatinase, 72kDa type IV collagenase)	O	72 kDa gelatinase|72 kDa type IV collage	MMP2	NO	#N/A
ENSG00000087253	0.535121	4.41477	28.9897	7.27631e-08	0.000881524	9606	54947	NULL	16	16q12.2	lysophosphatidylcholine acyltransferase 2	protein-coding	LPCAT2	lysophosphatidylcholine acyltransferase 2	O	1-acylglycerophosphocholine O-acyltransf	LPCAT2	NO	#N/A
ENSG00000087263	-0.157425	6.66735	4.57062	0.0325248	1	9606	55239	NULL	16	16q12.2	2-oxoglutarate and iron-dependent oxygenase domain containing 1	protein-coding	OGFOD1	2-oxoglutarate and iron-dependent oxygenase domain containing 1	O	2-oxoglutarate and iron-dependent oxygen	OGFOD1	NO	#N/A
ENSG00000087266	-0.352256	6.13405	17.6521	2.65227e-05	0.289654	9606	6452	RES4-23	4	4p16.3	SH3-domain binding protein 2	protein-coding	SH3BP2	SH3-domain binding protein 2	O	Abl-SH3 binding protein 2|SH3 domain-bin	SH3BP2	NO	#N/A
ENSG00000087269	-0.32827	7.09677	24.0925	9.18154e-07	0.0107507	9606	8602	RES4-25	4	4p16.3	NOP14 nucleolar protein	protein-coding	NOP14	NOP14 nucleolar protein	O	NOP14 homolog|NOP14 nucleolar protein ho	NOP14	NO	#N/A
ENSG00000087274	-0.26388	7.64242	17.0151	3.70828e-05	0.401384	9606	118	RP11-520M5.1	4	4p16.3	adducin 1 (alpha)	protein-coding	ADD1	adducin 1 (alpha)	O	alpha-adducin|erythrocyte adducin alpha	ADD1	NO	#N/A
ENSG00000087299	0.24206	3.47144	3.09374	0.0785938	1	9606	79944	NULL	14	14q21.3	L-2-hydroxyglutarate dehydrogenase	protein-coding	L2HGDH	L-2-hydroxyglutarate dehydrogenase	O	2-hydroxyglutarate dehydrogenase|L-2-hyd	L2HGDH	NO	#N/A
ENSG00000087301	0.835717	3.22229	45.6564	1.40926e-11	1.8164e-07	9606	57544	NULL	14	14q22.1	thioredoxin domain containing 16	protein-coding	TXNDC16	thioredoxin domain containing 16	O	thioredoxin domain-containing protein 16	TXNDC16	NO	#N/A
ENSG00000087302	-0.00185202	5.98268	0.000543545	0.9814	1	9606	51637	CGI-99	14	14q22.1	chromosome 14 open reading frame 166	protein-coding	C14orf166	chromosome 14 open reading frame 166	O	CLE7 homolog|RLL motif containing 1|UPF0	C14orf166	NO	#N/A
ENSG00000087303	0.107373	7.36331	2.70254	0.100188	1	9606	22795	NULL	14	14q22.1	nidogen 2 (osteonidogen)	protein-coding	NID2	nidogen 2 (osteonidogen)	O	nidogen-2|osteonidogen	NID2	NO	#N/A
ENSG00000087338	0.0227041	5.37903	0.0468817	0.828581	1	9606	64395	NULL	2	2p13.3	germ cell-less, spermatogenesis associated 1	protein-coding	GMCL1	germ cell-less, spermatogenesis associated 1	O	germ cell-less homolog 1|germ cell-less	GMCL1	NO	#N/A
ENSG00000087365	-0.227715	8.81845	9.31753	0.00226972	1	9606	10992	NULL	11	11q13.1	splicing factor 3b, subunit 2, 145kDa	protein-coding	SF3B2	splicing factor 3b, subunit 2, 145kDa	O	SAP 145|pre-mRNA splicing factor SF3b 14	SF3B2	NO	#N/A
ENSG00000087448	-0.235555	5.49842	8.63841	0.00329148	1	9606	57542	NULL	12	12p11.22	kelch-like family member 42	protein-coding	KLHL42	kelch-like family member 42	O	cullin-3-binding protein 9|kelch domain	KLHL42	NO	#N/A
ENSG00000087460	0.000861101	9.10494	0.000121491	0.991206	1	9606	2778	RP4-543J19.4	20	20q13.3	GNAS complex locus	protein-coding	GNAS	GNAS complex locus	O	adenylate cyclase-stimulating G alpha pr	GNAS	NO	#N/A
ENSG00000087470	-0.0245997	7.16812	0.103103	0.748137	1	9606	10059	NULL	12	12p11.21	dynamin 1-like	protein-coding	DNM1L	dynamin 1-like	O	Dnm1p/Vps1p-like protein|dynamin family	DNM1L	NO	#N/A
ENSG00000087502	0.218014	6.51218	5.61075	0.0178506	1	9606	51290	CDA14	12	12p11.22	ERGIC and golgi 2	protein-coding	ERGIC2	ERGIC and golgi 2	O	CD14 protein|endoplasmic reticulum-Golgi	ERGIC2	NO	#N/A
ENSG00000087586	-0.920021	6.20872	126.196	2.78564e-29	3.82385e-25	9606	6790	RP5-1167H4.6	20	20q13	aurora kinase A	protein-coding	AURKA	aurora kinase A	O	ARK-1|Aurora-A kinase|IPL1-related kinas	AURKA	NO	#N/A
ENSG00000087842	-0.378546	4.48616	14.3485	0.000151904	1	9606	8544	NULL	X	Xp22.2	pirin (iron-binding nuclear protein)	protein-coding	PIR	pirin (iron-binding nuclear protein)	O	pirin|probable quercetin 2,3-dioxygenase	PIR	NO	#N/A
ENSG00000087884	0.0771346	3.24071	0.227407	0.633453	1	9606	28971	PTD015	11	11q14.1	adipogenesis associated, Mth938 domain containing	protein-coding	AAMDC	adipogenesis associated, Mth938 domain containing	O	UPF0366 protein C11orf67|adipogenesis as	AAMDC	NO	#N/A
ENSG00000087903	0.147196	3.12552	1.36798	0.242159	1	9606	5990	NULL	19	19p13.3	regulatory factor X, 2 (influences HLA class II expression)	protein-coding	RFX2	regulatory factor X, 2 (influences HLA class II expression)	O	DNA binding protein RFX2|DNA-binding pro	RFX2	NO	#N/A
ENSG00000087995	0.0398955	6.38645	0.270595	0.602933	1	9606	339175	HSPC266	17	17q23.2	methyltransferase like 2A	protein-coding	METTL2A	methyltransferase like 2A	O	methyltransferase-like protein 2A	METTL2A	NO	#N/A
ENSG00000088035	0.437958	3.58342	8.85719	0.00291937	1	9606	29929	My046	1	1p31.3	ALG6, alpha-1,3-glucosyltransferase	protein-coding	ALG6	ALG6, alpha-1,3-glucosyltransferase	O	Man(9)GlcNAc(2)-PP-Dol alpha-1,3-glucosy	ALG6	NO	#N/A
ENSG00000088038	-0.161701	5.94591	4.39705	0.0360012	1	9606	4849	XXbac-BCX105G6.1	19	19q13.4	CCR4-NOT transcription complex, subunit 3	protein-coding	CNOT3	CCR4-NOT transcription complex, subunit 3	O	CCR4-NOT transcription complex subunit 3	CNOT3	NO	#N/A
ENSG00000088179	-0.153165	4.73876	1.56545	0.210869	1	9606	5775	NULL	2	2q14.2	protein tyrosine phosphatase, non-receptor type 4 (megakaryocyte)	protein-coding	PTPN4	protein tyrosine phosphatase, non-receptor type 4 (megakaryocyte)	O	PTPase-MEG1|megakaryocyte phosphatase|me	PTPN4	NO	#N/A
ENSG00000088205	0.0651376	8.18877	0.94016	0.332237	1	9606	8886	NULL	2	2q14.1	DEAD (Asp-Glu-Ala-Asp) box polypeptide 18	protein-coding	DDX18	DEAD (Asp-Glu-Ala-Asp) box polypeptide 18	O	ATP-dependent RNA helicase DDX18|DEAD bo	DDX18	NO	#N/A
ENSG00000088247	-0.531032	8.24753	43.8577	3.53142e-11	4.53187e-07	9606	8570	NULL	19	19p13.3	KH-type splicing regulatory protein	protein-coding	KHSRP	KH-type splicing regulatory protein	O	FUSE binding protein 2|FUSE-binding prot	KHSRP	NO	#N/A
ENSG00000088256	-0.913628	6.4966	135.019	3.27048e-31	4.49854e-27	9606	2767	NULL	19	19p13.3	guanine nucleotide binding protein (G protein), alpha 11 (Gq class)	protein-coding	GNA11	guanine nucleotide binding protein (G protein), alpha 11 (Gq class)	O	G-protein subunit alpha-11|g alpha-11|gu	GNA11	NO	#N/A
ENSG00000088280	-0.267844	5.2922	6.59071	0.0102513	1	9606	55616	NULL	1	1p36.12	ArfGAP with SH3 domain, ankyrin repeat and PH domain 3	protein-coding	ASAP3	ArfGAP with SH3 domain, ankyrin repeat and PH domain 3	O	ARF6 GTPase-activating protein|ArfGAP wi	ASAP3	NO	#N/A
ENSG00000088298	-0.0167247	4.06826	0.0251083	0.874098	1	9606	55741	UNQ573/PRO1135	20	20q11.22	ER degradation enhancer, mannosidase alpha-like 2	protein-coding	EDEM2	ER degradation enhancer, mannosidase alpha-like 2	O	ER degradation-enhancing alpha-mannosida	EDEM2	NO	#N/A
ENSG00000088305	0.30671	4.41462	8.54668	0.00346153	1	9606	1789	RP5-1085F17.2	20	20q11.2	DNA (cytosine-5-)-methyltransferase 3 beta	protein-coding	DNMT3B	DNA (cytosine-5-)-methyltransferase 3 beta	O	DNA (cytosine-5)-methyltransferase 3B|DN	DNMT3B	NO	#N/A
ENSG00000088325	-0.453266	8.47448	39.8802	2.70032e-10	3.42401e-06	9606	22974	RP11-243J16.10-002	20	20q11.2	TPX2, microtubule-associated, homolog (Xenopus laevis)	protein-coding	TPX2	TPX2, microtubule-associated, homolog (Xenopus laevis)	O	TPX2, microtubule-associated protein hom	TPX2	NO	#N/A
ENSG00000088340	1.38328	0.101613	18.4104	1.78083e-05	0.19664	9606	80307	RP3-477O4.7	20	20q11.22	fer-1-like 4 (C. elegans) pseudogene	pseudo	FER1L4	fer-1-like 4 (C. elegans) pseudogene	O	NULL	FER1L4	NO	#N/A
ENSG00000088356	-0.283569	3.93388	3.57357	0.0587059	1	9606	81572	RP1-310O13.8	20	20q11.21	p53 and DNA-damage regulated 1	protein-coding	PDRG1	p53 and DNA-damage regulated 1	O	p53 and DNA damage regulated 1|p53 and D	PDRG1	NO	#N/A
ENSG00000088367	0.0177157	6.08189	0.0556459	0.813515	1	9606	2036	RP11-234K24.1	20	20q11.2-q12	erythrocyte membrane protein band 4.1-like 1	protein-coding	EPB41L1	erythrocyte membrane protein band 4.1-like 1	O	band 4.1-like protein 1|neuron-type none	EPB41L1	NO	#N/A
ENSG00000088387	0.126353	4.87602	1.21466	0.270411	1	9606	23348	RP11-155N3.2	13	13q32.3	dedicator of cytokinesis 9	protein-coding	DOCK9	dedicator of cytokinesis 9	O	cdc42 guanine nucleotide exchange factor	DOCK9	NO	#N/A
ENSG00000088448	0.623608	5.36494	45.6067	1.44546e-11	1.8629e-07	9606	55608	RP11-120J20.3	13	13q34	ankyrin repeat domain 10	protein-coding	ANKRD10	ankyrin repeat domain 10	O	ankyrin repeat domain-containing protein	ANKRD10	NO	#N/A
ENSG00000088451	-0.0206235	4.01647	0.0406192	0.840275	1	9606	23483	RP11-124B17.2	13	13q32.1	TDP-glucose 4,6-dehydratase	protein-coding	TGDS	TDP-glucose 4,6-dehydratase	O	dTDP-D-glucose 4,6-dehydratase|growth-in	TGDS	NO	#N/A
ENSG00000088538	-0.208791	3.44398	3.24975	0.0714342	1	9606	1795	NULL	3	3p21.2	dedicator of cytokinesis 3	protein-coding	DOCK3	dedicator of cytokinesis 3	O	dedicator of cytokinesis protein 3|modif	DOCK3	NO	#N/A
ENSG00000088543	-0.261492	2.92899	3.93602	0.0472625	1	9606	51161	NULL	3	3p21.3	chromosome 3 open reading frame 18	protein-coding	C3orf18	chromosome 3 open reading frame 18	O	uncharacterized protein C3orf18	C3orf18	NO	#N/A
ENSG00000088682	0.169445	4.87459	3.71814	0.0538242	1	9606	57017	HSPC326	16	16q21	coenzyme Q9 homolog (S. cerevisiae)	protein-coding	COQ9	coenzyme Q9 homolog (S. cerevisiae)	O	ubiquinone biosynthesis protein COQ9, mi	COQ9	NO	#N/A
ENSG00000088727	-0.098113	2.57714	0.469468	0.493232	1	9606	64147	NULL	3	3p21.31	kinesin family member 9	protein-coding	KIF9	kinesin family member 9	O	kinesin protein 9|kinesin-like protein K	KIF9	NO	#N/A
ENSG00000088756	-0.18588	1.91821	1.13227	0.287291	1	9606	79822	NULL	18	18p11.31	Rho GTPase activating protein 28	protein-coding	ARHGAP28	Rho GTPase activating protein 28	O	rho GTPase-activating protein 28|rho-typ	ARHGAP28	NO	#N/A
ENSG00000088766	-0.0454394	5.66284	0.310638	0.577289	1	9606	54675	NULL	20	20p13-p12.3	cardiolipin synthase 1	protein-coding	CRLS1	cardiolipin synthase 1	O	cardiolipin synthase	CRLS1	NO	#N/A
ENSG00000088808	0.578357	1.33855	8.00833	0.00465626	1	9606	23368	NULL	14	14q32.33	protein phosphatase 1, regulatory subunit 13B	protein-coding	PPP1R13B	protein phosphatase 1, regulatory subunit 13B	O	apoptosis-stimulating of p53 protein 1|a	PPP1R13B	NO	#N/A
ENSG00000088812	0.127022	6.11998	1.40326	0.236179	1	9606	8455	NULL	20	20p13	attractin	protein-coding	ATRN	attractin	O	attractin-2|mahogany homolog|mahogany pr	ATRN	NO	#N/A
ENSG00000088826	-0.421064	2.31502	7.12442	0.0076041	1	9606	54498	RP4-779E11.4	20	20p13	spermine oxidase	protein-coding	SMOX	spermine oxidase	O	flavin containing amine oxidase|flavin-c	SMOX	NO	#N/A
ENSG00000088832	0.0924095	8.79701	1.86344	0.172228	1	9606	2280	RP11-314N13.2	20	20p13	FK506 binding protein 1A, 12kDa	protein-coding	FKBP1A	FK506 binding protein 1A, 12kDa	O	12 kDa FK506-binding protein|12 kDa FKBP	FKBP1A	NO	#N/A
ENSG00000088833	-0.496867	6.1528	45.2748	1.71239e-11	2.20453e-07	9606	55968	RP4-776F14.2	20	20p13	NSFL1 (p97) cofactor (p47)	protein-coding	NSFL1C	NSFL1 (p97) cofactor (p47)	O	NSFL1 cofactor p47|SHP1 homolog|UBX doma	NSFL1C	NO	#N/A
ENSG00000088854	-0.205847	2.56289	1.70566	0.191549	1	9606	25943	hCG_39261	20	20p13	chromosome 20 open reading frame 194	protein-coding	C20orf194	chromosome 20 open reading frame 194	O	uncharacterized protein C20orf194	C20orf194	NO	#N/A
ENSG00000088876	0.218106	4.50197	5.10671	0.0238334	1	9606	79175	RP4-734P14.3	20	20p13	zinc finger protein 343	protein-coding	ZNF343	zinc finger protein 343	O	NULL	ZNF343	NO	#N/A
ENSG00000088888	0.0584665	7.11658	0.659394	0.416774	1	9606	57506	NULL	20	20p13	mitochondrial antiviral signaling protein	protein-coding	MAVS	mitochondrial antiviral signaling protein	O	CARD adapter inducing interferon beta|CA	MAVS	NO	#N/A
ENSG00000088899	0.658612	3.47731	30.3005	3.70038e-08	0.00045141	9606	9762	RP5-1187M17.10-001	20	20p13	leucine zipper, putative tumor suppressor family member 3	protein-coding	NULL	NULL	NULL	ProSAP/Shank-interacting protein 1|proSA	LZTS3	NO	#N/A
ENSG00000088930	-0.241882	7.18544	11.64	0.000645498	1	9606	22803	RP11-227D2.1	20	20p11.2-p11.1	5'-3' exoribonuclease 2	protein-coding	XRN2	5'-3' exoribonuclease 2	O	DHP protein|Dhm1-like protein (mouse hom	XRN2	NO	#N/A
ENSG00000088970	0.49667	3.07113	11.1319	0.000848551	1	#N/A	#N/A	#N/A	#N/A	#N/A	#N/A	#N/A	#N/A	#N/A	#N/A	#N/A	KIZ	NO	#N/A
ENSG00000088986	-0.248193	7.11886	10.1071	0.00147698	1	9606	8655	NULL	12	12q24.23	dynein, light chain, LC8-type 1	protein-coding	DYNLL1	dynein, light chain, LC8-type 1	O	8 kDa dynein light chain|cytoplasmic dyn	DYNLL1	NO	#N/A
ENSG00000089006	-0.425778	6.57693	30.5061	3.32812e-08	0.000406263	9606	27131	RP11-504H3.2	20	20p11	sorting nexin 5	protein-coding	SNX5	sorting nexin 5	O	sorting nexin-5	SNX5	NO	#N/A
ENSG00000089009	-0.0457255	10.1556	0.522775	0.46966	1	9606	6128	NULL	12	12q24.1	ribosomal protein L6	protein-coding	RPL6	ribosomal protein L6	O	60S ribosomal protein L6|DNA-binding pro	RPL6	NO	#N/A
ENSG00000089022	-0.138095	5.76236	3.02857	0.0818101	1	9606	8550	NULL	12	12q24.13	mitogen-activated protein kinase-activated protein kinase 5	protein-coding	MAPKAPK5	mitogen-activated protein kinase-activated protein kinase 5	O	MAP kinase-activated protein kinase 5|MA	MAPKAPK5	NO	#N/A
ENSG00000089041	0.117569	2.86549	0.789125	0.374365	1	9606	5027	NULL	12	12q24	purinergic receptor P2X, ligand-gated ion channel, 7	protein-coding	P2RX7	purinergic receptor P2X, ligand-gated ion channel, 7	O	ATP receptor|P2X purinoceptor 7|P2X7 rec	P2RX7	NO	#N/A
ENSG00000089048	0.06003	5.5464	0.59313	0.441211	1	9606	51575	HDCMC28P	20	20p12.1	ESF1, nucleolar pre-rRNA processing protein, homolog (S. cerevisiae)	protein-coding	ESF1	ESF1, nucleolar pre-rRNA processing protein, homolog (S. cerevisiae)	O	ABT1-associated protein|ESF1 homolog	ESF1	NO	#N/A
ENSG00000089050	0.100117	4.92165	0.940611	0.332121	1	9606	10741	NULL	20	20p11.2	retinoblastoma binding protein 9	protein-coding	RBBP9	retinoblastoma binding protein 9	O	B5T overexpressed gene protein|B5T-overe	RBBP9	NO	#N/A
ENSG00000089053	-0.0705942	7.75213	1.14633	0.28432	1	9606	51433	NULL	12	12q24.31	anaphase promoting complex subunit 5	protein-coding	ANAPC5	anaphase promoting complex subunit 5	O	anaphase-promoting complex subunit 5|cyc	ANAPC5	NO	#N/A
ENSG00000089057	-0.0319568	6.50008	0.150337	0.698214	1	9606	9962	RP1-237C24.1	20	20p13	solute carrier family 23 (nucleobase transporters), member 2	protein-coding	SLC23A2	solute carrier family 23 (nucleobase transporters), member 2	O	Na(+)/L-ascorbic acid transporter 2|hSVC	SLC23A2	NO	#N/A
ENSG00000089060	-0.143069	4.6624	1.12268	0.289341	1	#N/A	#N/A	#N/A	#N/A	#N/A	#N/A	#N/A	#N/A	#N/A	#N/A	#N/A	SLC8B1	NO	#N/A
ENSG00000089063	0.576957	6.60859	70.192	5.38029e-17	7.19345e-13	9606	29058	RP5-1116H23.2	20	20p13	transmembrane protein 230	protein-coding	TMEM230	transmembrane protein 230	O	UPF0414 transmembrane protein C20orf30	TMEM230	NO	#N/A
ENSG00000089091	0.218182	2.29629	1.96276	0.161218	1	9606	55184	NULL	20	20p11.23	double zinc ribbon and ankyrin repeat domains 1	protein-coding	DZANK1	double zinc ribbon and ankyrin repeat domains 1	O	ankyrin repeat domain 64|ankyrin repeat-	DZANK1	NO	#N/A
ENSG00000089094	-0.255746	6.08623	8.30398	0.00395583	1	9606	84678	NULL	12	12q24.31	lysine (K)-specific demethylase 2B	protein-coding	KDM2B	lysine (K)-specific demethylase 2B	O	CXXC-type zinc finger protein 2|F-box an	KDM2B	NO	#N/A
ENSG00000089123	0.433446	3.20744	10.7654	0.00103418	1	9606	55617	RP4-585I14.1	20	20p12.1	taspase, threonine aspartase, 1	protein-coding	TASP1	taspase, threonine aspartase, 1	O	taspase 1|taspase-1|threonine aspartase	TASP1	NO	#N/A
ENSG00000089127	0.236096	3.38803	2.72519	0.0987764	1	9606	4938	NULL	12	12q24.2	2'-5'-oligoadenylate synthetase 1, 40/46kDa	protein-coding	OAS1	2'-5'-oligoadenylate synthetase 1, 40/46kDa	O	(2-5')oligo(A) synthase 1|(2-5')oligo(A)	OAS1	NO	#N/A
ENSG00000089154	-0.0550389	8.75139	0.449179	0.502725	1	9606	10985	NULL	12	12q24.2	GCN1 general control of amino-acid synthesis 1-like 1 (yeast)	protein-coding	GCN1L1	GCN1 general control of amino-acid synthesis 1-like 1 (yeast)	O	GCN1 (general control of amino-acid synt	GCN1L1	NO	#N/A
ENSG00000089157	-0.090723	10.6538	1.49215	0.221884	1	9606	6175	NULL	12	12q24.2	ribosomal protein, large, P0	protein-coding	RPLP0	ribosomal protein, large, P0	O	60S acidic ribosomal protein P0|60S ribo	RPLP0	NO	#N/A
ENSG00000089159	-0.0703405	9.01243	1.26574	0.260568	1	9606	5829	hCG_1778014	12	12q24.31	paxillin	protein-coding	PXN	paxillin	O	NULL	PXN	NO	#N/A
ENSG00000089177	0.157327	4.17626	2.06661	0.150556	1	9606	55614	RP5-971B4.1	20	20p11.23	kinesin family member 16B	protein-coding	KIF16B	kinesin family member 16B	O	kinesin motor protein|kinesin-like prote	KIF16B	NO	#N/A
ENSG00000089195	0.118588	5.66032	2.04709	0.152497	1	9606	51605	CGI-09	20	20p12.3	tRNA methyltransferase 6 homolog (S. cerevisiae)	protein-coding	TRMT6	tRNA methyltransferase 6 homolog (S. cerevisiae)	O	tRNA (adenine(58)-N(1))-methyltransferas	TRMT6	NO	#N/A
ENSG00000089220	0.0225595	7.58063	0.0683053	0.79382	1	9606	5037	NULL	12	12q24.23	phosphatidylethanolamine binding protein 1	protein-coding	PEBP1	phosphatidylethanolamine binding protein 1	O	Raf kinase inhibitory protein|hippocampa	PEBP1	NO	#N/A
ENSG00000089234	-0.0332282	5.16957	0.156482	0.692416	1	9606	8315	NULL	12	12q24	BRCA1 associated protein	protein-coding	BRAP	BRCA1 associated protein	O	BRCA1-associated protein|RING finger pro	BRAP	NO	#N/A
ENSG00000089248	-0.261622	6.67648	5.26379	0.0217736	1	9606	10961	NULL	12	12q24.13	endoplasmic reticulum protein 29	protein-coding	ERP29	endoplasmic reticulum protein 29	O	endoplasmic reticulum lumenal protein ER	ERP29	NO	#N/A
ENSG00000089280	-0.649097	9.12041	35.4698	2.59035e-09	3.23793e-05	9606	2521	NULL	16	16p11.2	fused in sarcoma	protein-coding	FUS	fused in sarcoma	O	75 kDa DNA-pairing protein|RNA-binding p	FUS	NO	#N/A
ENSG00000089289	-0.268096	4.87034	9.92929	0.00162669	1	9606	3476	RP13-46G5.1	X	Xq13.1-q13.3	immunoglobulin (CD79A) binding protein 1	protein-coding	IGBP1	immunoglobulin (CD79A) binding protein 1	O	B cell signal transduction molecule alph	IGBP1	NO	#N/A
ENSG00000089327	-0.231833	5.77198	7.10824	0.00767305	1	9606	53827	HSPC113	19	19q13.12	FXYD domain containing ion transport regulator 5	protein-coding	FXYD5	FXYD domain containing ion transport regulator 5	O	FXYD domain-containing ion transport reg	FXYD5	NO	#N/A
ENSG00000089335	-0.215606	4.79323	4.27789	0.0386114	1	9606	55900	NULL	19	19q13.11	zinc finger protein 302	protein-coding	ZNF302	zinc finger protein 302	O	zinc finger protein 327	ZNF302	NO	#N/A
ENSG00000089351	0.258631	5.36582	8.4664	0.00361766	1	9606	57655	NULL	19	19q13.13	GRAM domain containing 1A	protein-coding	GRAMD1A	GRAM domain containing 1A	O	GRAM domain-containing protein 1A	GRAMD1A	NO	#N/A
ENSG00000089486	-0.0970373	5.80548	1.05591	0.304151	1	9606	29965	NULL	16	16p13.3	cell death-inducing p53 target 1	protein-coding	CDIP1	cell death-inducing p53 target 1	O	LITAF-like protein|cell death inducing p	CDIP1	NO	#N/A
ENSG00000089597	-0.166943	9.39013	6.99009	0.00819621	1	9606	23193	NULL	11	11q12.3	glucosidase, alpha; neutral AB	protein-coding	GANAB	glucosidase, alpha; neutral AB	O	alpha glucosidase II alpha subunit|alpha	GANAB	NO	#N/A
ENSG00000089639	0.611827	2.67116	8.98722	0.00271875	1	9606	51291	NULL	19	19p13.11	GEM interacting protein	protein-coding	GMIP	GEM interacting protein	O	GEM-interacting protein	GMIP	NO	#N/A
ENSG00000089682	0.317417	4.05332	5.50891	0.0189199	1	9606	55285	RP13-383K5.1	X	Xq22.3	RNA binding motif protein 41	protein-coding	RBM41	RNA binding motif protein 41	O	RNA-binding motif protein 41|RNA-binding	RBM41	NO	#N/A
ENSG00000089685	-0.746863	8.04604	89.9195	2.48047e-21	3.36178e-17	9606	332	NULL	17	17q25	baculoviral IAP repeat containing 5	protein-coding	BIRC5	baculoviral IAP repeat containing 5	O	apoptosis inhibitor 4|apoptosis inhibito	BIRC5	NO	#N/A
ENSG00000089693	-0.171688	7.95417	2.59742	0.107038	1	9606	8079	NULL	12	12p13	myeloid leukemia factor 2	protein-coding	MLF2	myeloid leukemia factor 2	O	myelodysplasia-myeloid leukemia factor 2	MLF2	NO	#N/A
ENSG00000089723	0.0987275	0.531007	0.141895	0.706404	1	9606	78990	NULL	14	14q32.12	OTU domain, ubiquitin aldehyde binding 2	protein-coding	OTUB2	OTU domain, ubiquitin aldehyde binding 2	O	OTU domain-containing ubiquitin aldehyde	OTUB2	NO	#N/A
ENSG00000089737	-0.304747	6.77952	20.6862	5.41043e-06	0.0613327	9606	57062	NULL	14	14q32	DEAD (Asp-Glu-Ala-Asp) box polypeptide 24	protein-coding	DDX24	DEAD (Asp-Glu-Ala-Asp) box polypeptide 24	O	ATP-dependent RNA helicase DDX24|DEAD bo	DDX24	NO	#N/A
ENSG00000089775	0.748978	3.67453	35.4182	2.65993e-09	3.32385e-05	9606	7597	NULL	14	14q23-q24	zinc finger and BTB domain containing 25	protein-coding	ZBTB25	zinc finger and BTB domain containing 25	O	zinc finger and BTB domain-containing pr	ZBTB25	NO	#N/A
ENSG00000089818	0.101216	5.95632	1.64401	0.199777	1	9606	25977	NULL	12	12p13.31	NECAP endocytosis associated 1	protein-coding	NECAP1	NECAP endocytosis associated 1	O	NECAP endocytosis-associated protein 1|N	NECAP1	NO	#N/A
ENSG00000089820	-0.638275	0.0913514	4.29694	0.038181	1	9606	393	NULL	X	Xq28	Rho GTPase activating protein 4	protein-coding	ARHGAP4	Rho GTPase activating protein 4	O	Rho-GAP hematopoietic protein C1|rho GTP	ARHGAP4	NO	#N/A
ENSG00000089876	-0.338386	5.12701	11.6523	0.000641246	1	9606	55760	NULL	10	10q26.2	DEAH (Asp-Glu-Ala-His) box polypeptide 32	protein-coding	DHX32	DEAH (Asp-Glu-Ala-His) box polypeptide 32	O	DEAD/H (Asp-Glu-Ala-Asp/His) box polypep	DHX32	NO	#N/A
ENSG00000089902	-0.177412	5.74062	3.3047	0.069082	1	9606	23186	NULL	14	14q32.31	REST corepressor 1	protein-coding	RCOR1	REST corepressor 1	O	NULL	RCOR1	NO	#N/A
ENSG00000089916	0.14031	5.34817	2.79255	0.0947034	1	9606	55668	NULL	14	14q24.3	G patch domain containing 2-like	protein-coding	GPATCH2L	G patch domain containing 2-like	O	G patch domain-containing protein 2-like	GPATCH2L	NO	#N/A
ENSG00000090006	0.159915	6.44456	4.05768	0.043971	1	9606	8425	NULL	19	19q13.1-q13.2	latent transforming growth factor beta binding protein 4	protein-coding	LTBP4	latent transforming growth factor beta binding protein 4	O	latent transforming growth factor-beta b	LTBP4	NO	#N/A
ENSG00000090013	0.28633	4.52839	4.90585	0.0267659	1	9606	645	NULL	19	19q13.1-q13.2	biliverdin reductase B (flavin reductase (NADPH))	protein-coding	BLVRB	biliverdin reductase B (flavin reductase (NADPH))	O	BVR-B|FR|GHBP|NADPH-dependent diaphorase	BLVRB	NO	#N/A
ENSG00000090020	-0.779602	5.44295	81.7416	1.55092e-19	2.09189e-15	9606	6548	RP4-633N17.1	1	1p36.1-p35	solute carrier family 9, subfamily A (NHE1, cation proton antiporter 1), member 1	protein-coding	SLC9A1	solute carrier family 9, subfamily A (NHE1, cation proton antiporter 1), member 1	O	Na(+)/H(+) exchanger 1|Na-Li countertran	SLC9A1	NO	#N/A
ENSG00000090054	0.0908238	5.97433	1.04697	0.306206	1	9606	10558	RP11-118F2.1	9	9q22.2	serine palmitoyltransferase, long chain base subunit 1	protein-coding	SPTLC1	serine palmitoyltransferase, long chain base subunit 1	O	LCB 1|SPT 1|long chain base biosynthesis	SPTLC1	NO	#N/A
ENSG00000090060	0.0114225	7.73031	0.0171958	0.89567	1	9606	10914	NULL	14	14q32.31	poly(A) polymerase alpha	protein-coding	PAPOLA	poly(A) polymerase alpha	O	PAP-alpha|polynucleotide adenylyltransfe	PAPOLA	NO	#N/A
ENSG00000090061	-0.0713197	5.86583	0.866902	0.351814	1	9606	8812	NULL	14	14q32	cyclin K	protein-coding	CCNK	cyclin K	O	cyclin-K	CCNK	NO	#N/A
ENSG00000090097	1.18446	3.95775	104.979	1.23415e-24	1.68425e-20	9606	57060	NULL	3	3p21	poly(rC) binding protein 4	protein-coding	PCBP4	poly(rC) binding protein 4	O	LYST-interacting protein|RNA binding pro	PCBP4	UP	PCBP4
ENSG00000090238	0.419862	2.64373	8.50576	0.00354025	1	9606	83719	FKSG5	16	16p11.2	yippee-like 3 (Drosophila)	protein-coding	YPEL3	yippee-like 3 (Drosophila)	O	protein yippee-like 3	YPEL3	NO	#N/A
ENSG00000090263	0.276919	5.68764	11.6341	0.000647531	1	9606	51650	CGI-139	7	7q34	mitochondrial ribosomal protein S33	protein-coding	MRPS33	mitochondrial ribosomal protein S33	O	28S ribosomal protein S33, mitochondrial	MRPS33	NO	#N/A
ENSG00000090266	0.111158	6.1358	0.623834	0.429626	1	9606	4708	NULL	7	7q34	NADH dehydrogenase (ubiquinone) 1 beta subcomplex, 2, 8kDa	protein-coding	NDUFB2	NADH dehydrogenase (ubiquinone) 1 beta subcomplex, 2, 8kDa	O	NADH dehydrogenase [ubiquinone] 1 beta s	NDUFB2	NO	#N/A
ENSG00000090273	-0.521643	7.39289	21.1341	4.28232e-06	0.048827	9606	10726	NULL	1	1p35-p34	nuclear distribution C homolog (A. nidulans)	protein-coding	NUDC	nuclear distribution C homolog (A. nidulans)	O	nuclear distribution gene C homolog|nucl	NUDC	NO	#N/A
ENSG00000090316	-0.370441	6.82511	23.3114	1.37779e-06	0.0160196	9606	10296	HLC10	4	4p16.3	macrophage erythroblast attacher	protein-coding	MAEA	macrophage erythroblast attacher	O	GID complex subunit 9, FYV10 homolog|cel	MAEA	NO	#N/A
ENSG00000090339	1.38745	3.57856	119.594	7.76476e-28	1.06439e-23	9606	3383	NULL	19	19p13.3-p13.2	intercellular adhesion molecule 1	protein-coding	ICAM1	intercellular adhesion molecule 1	O	ICAM-1|cell surface glycoprotein P3.58|i	ICAM1	UP	ICAM1
ENSG00000090372	-0.234699	6.71681	6.6797	0.00975171	1	9606	29888	NULL	19	19q13.2	striatin, calmodulin binding protein 4	protein-coding	STRN4	striatin, calmodulin binding protein 4	O	striatin-4	STRN4	NO	#N/A
ENSG00000090376	0.078341	4.91445	0.373878	0.540898	1	9606	11213	NULL	12	12q14.3	interleukin-1 receptor-associated kinase 3	protein-coding	IRAK3	interleukin-1 receptor-associated kinase 3	O	IL-1 receptor-associated kinase M	IRAK3	NO	#N/A
ENSG00000090432	-0.0716996	5.23255	0.78125	0.376759	1	9606	79594	NULL	1	1p36.12	mitochondrial E3 ubiquitin protein ligase 1	protein-coding	MUL1	mitochondrial E3 ubiquitin protein ligase 1	O	E3 SUMO-protein ligase MUL1|E3 ubiquitin	MUL1	NO	#N/A
ENSG00000090447	-0.204395	4.79599	2.7735	0.0958361	1	9606	7023	NULL	16	16p13	transcription factor AP-4 (activating enhancer binding protein 4)	protein-coding	TFAP4	transcription factor AP-4 (activating enhancer binding protein 4)	O	activating enhancer-binding protein 4|cl	TFAP4	NO	#N/A
ENSG00000090470	0.161472	6.23156	3.41302	0.0646841	1	9606	10081	NULL	15	15q22.31	programmed cell death 7	protein-coding	PDCD7	programmed cell death 7	O	U11/U12 snRNP 59K|apoptosis-related prot	PDCD7	NO	#N/A
ENSG00000090487	0.202242	6.76537	5.60732	0.0178856	1	9606	51324	BM-019	15	15q21-q22	spastic paraplegia 21 (autosomal recessive, Mast syndrome)	protein-coding	SPG21	spastic paraplegia 21 (autosomal recessive, Mast syndrome)	O	acid cluster protein 33|maspardin|spasti	SPG21	NO	#N/A
ENSG00000090520	-0.415478	5.98628	20.1927	7.00193e-06	0.0789188	9606	51726	PSEC0121	3	3q27.3	DnaJ (Hsp40) homolog, subfamily B, member 11	protein-coding	DNAJB11	DnaJ (Hsp40) homolog, subfamily B, member 11	O	APOBEC1-binding protein 2|DnaJ protein 9	DNAJB11	NO	#N/A
ENSG00000090530	0.287883	5.45706	11.0581	0.000883001	1	#N/A	#N/A	#N/A	#N/A	#N/A	#N/A	#N/A	#N/A	#N/A	#N/A	#N/A	P3H2	NO	#N/A
ENSG00000090554	-0.0132589	1.57605	0.00386615	0.950421	1	9606	2323	NULL	19	19q13.3	fms-related tyrosine kinase 3 ligand	protein-coding	FLT3LG	fms-related tyrosine kinase 3 ligand	O	flt3 ligand	FLT3LG	NO	#N/A
ENSG00000090565	-1.06544	5.48485	146.933	8.11697e-34	1.1186e-29	9606	9727	NULL	16	16p13.3	RAB11 family interacting protein 3 (class II)	protein-coding	RAB11FIP3	RAB11 family interacting protein 3 (class II)	O	EF hands-containing Rab-interacting prot	RAB11FIP3	DOWN	RAB11FIP3
ENSG00000090581	-0.127774	4.94053	2.01295	0.155962	1	9606	84572	CAB56184	16	16p13.3	N-acetylglucosamine-1-phosphate transferase, gamma subunit	protein-coding	GNPTG	N-acetylglucosamine-1-phosphate transferase, gamma subunit	O	N-acetylglucosamine-1-phosphotransferase	GNPTG	NO	#N/A
ENSG00000090612	-0.32882	4.67022	11.7524	0.000607663	1	9606	10795	NULL	12	12q24.33	zinc finger protein 268	protein-coding	ZNF268	zinc finger protein 268	O	zinc finger protein 3|zinc finger protei	ZNF268	NO	#N/A
ENSG00000090615	-0.304564	7.47775	18.4375	1.75566e-05	0.193948	9606	2802	NULL	12	12q24.33	golgin A3	protein-coding	GOLGA3	golgin A3	O	Golgi membrane associated protein|Golgi	GOLGA3	NO	#N/A
ENSG00000090621	-0.405306	8.17393	42.1162	8.60095e-11	1.09869e-06	9606	8761	NULL	1	1p34.2	poly(A) binding protein, cytoplasmic 4 (inducible form)	protein-coding	PABPC4	poly(A) binding protein, cytoplasmic 4 (inducible form)	O	PABP-4|activated-platelet protein 1|indu	PABPC4	NO	#N/A
ENSG00000090674	-0.186116	4.27603	2.95361	0.0856858	1	9606	57192	MSTP080	19	19p13.2	mucolipin 1	protein-coding	MCOLN1	mucolipin 1	O	mucolipidin|mucolipidosis type IV protei	MCOLN1	NO	#N/A
ENSG00000090686	-0.0593436	6.35026	0.559733	0.454368	1	9606	84196	NULL	1	1p36.12	ubiquitin specific peptidase 48	protein-coding	USP48	ubiquitin specific peptidase 48	O	deubiquitinating enzyme 48|ubiquitin car	USP48	NO	#N/A
ENSG00000090776	-0.455504	4.31875	15.177	9.78907e-05	1	9606	1947	RP3-496G1.1	X	Xq12	ephrin-B1	protein-coding	EFNB1	ephrin-B1	O	EFL-3|ELK ligand|LERK-2|eph-related rece	EFNB1	NO	#N/A
ENSG00000090857	0.0159991	5.46813	0.0253439	0.873513	1	9606	55066	NULL	16	16q22.1	pyruvate dehydrogenase phosphatase regulatory subunit	protein-coding	PDPR	pyruvate dehydrogenase phosphatase regulatory subunit	O	pyruvate dehydrogenase phosphatase regul	PDPR	NO	#N/A
ENSG00000090861	0.0392965	7.13303	0.225926	0.634561	1	9606	16	NULL	16	16q22	alanyl-tRNA synthetase	protein-coding	AARS	alanyl-tRNA synthetase	O	alaRS|alanine tRNA ligase 1, cytoplasmic	AARS	NO	#N/A
ENSG00000090863	-0.0353087	8.2884	0.236931	0.626431	1	9606	2734	NULL	16	16q22.3	golgi glycoprotein 1	protein-coding	GLG1	golgi glycoprotein 1	O	E-selectin ligand 1|Golgi apparatus prot	GLG1	NO	#N/A
ENSG00000090889	-0.475062	6.63409	43.8361	3.5706e-11	4.58144e-07	9606	24137	NULL	X	Xq13.1	kinesin family member 4A	protein-coding	KIF4A	kinesin family member 4A	O	chromokinesin-A|chromosome-associated ki	KIF4A	NO	#N/A
ENSG00000090905	-0.320323	6.82732	11.5455	0.000679119	1	9606	27327	NULL	16	16p11.2	trinucleotide repeat containing 6A	protein-coding	TNRC6A	trinucleotide repeat containing 6A	O	CAG repeat protein 26|EDIE|EMSY interact	TNRC6A	NO	#N/A
ENSG00000090924	-0.195112	4.07789	3.15463	0.075712	1	9606	64857	NULL	19	19q13.2	pleckstrin homology domain containing, family G (with RhoGef domain) member 2	protein-coding	PLEKHG2	pleckstrin homology domain containing, family G (with RhoGef domain) member 2	O	PH domain-containing family G member 2|c	PLEKHG2	NO	#N/A
ENSG00000090971	0.316382	3.05492	4.3824	0.0363118	1	9606	57106	NULL	19	19q13.42	N-acetyltransferase 14 (GCN5-related, putative)	protein-coding	NAT14	N-acetyltransferase 14 (GCN5-related, putative)	O	K562 cell-derived leucine-zipper-like pr	NAT14	NO	#N/A
ENSG00000090975	-1.10917	3.64324	83.2311	7.30007e-20	9.85509e-16	9606	57605	NULL	12	12q24.31	phosphatidylinositol transfer protein, membrane-associated 2	protein-coding	PITPNM2	phosphatidylinositol transfer protein, membrane-associated 2	O	PITPnm 2|PYK2 N-terminal domain-interact	PITPNM2	DOWN	PITPNM2
ENSG00000090989	0.120836	6.2148	1.7176	0.190002	1	9606	55763	BM-012	4	4q12	exocyst complex component 1	protein-coding	EXOC1	exocyst complex component 1	O	SEC3-like 1|exocyst complex component Se	EXOC1	NO	#N/A
ENSG00000091009	0.110063	5.58458	1.52095	0.217477	1	9606	54439	NULL	5	5q32	RNA binding motif protein 27	protein-coding	RBM27	RNA binding motif protein 27	O	RNA-binding motif protein 27|RNA-binding	RBM27	NO	#N/A
ENSG00000091039	0.378437	7.57653	10.4535	0.00122415	1	9606	114882	NULL	12	12q14	oxysterol binding protein-like 8	protein-coding	OSBPL8	oxysterol binding protein-like 8	O	ORP-8|OSBP-related protein 8|oxysterol-b	OSBPL8	NO	#N/A
ENSG00000091073	-0.228852	5.646	5.82985	0.0157564	1	9606	113878	NULL	7	7q11.23	deltex homolog 2 (Drosophila)	protein-coding	DTX2	deltex homolog 2 (Drosophila)	O	deltex2|hDTX2|probable E3 ubiquitin-prot	DTX2	NO	#N/A
ENSG00000091127	-0.00699953	5.56155	0.00383716	0.950607	1	9606	54517	NULL	7	7q22.3	pseudouridylate synthase 7 homolog (S. cerevisiae)	protein-coding	PUS7	pseudouridylate synthase 7 homolog (S. cerevisiae)	O	pseudouridylate synthase 7 homolog	PUS7	NO	#N/A
ENSG00000091136	0.125876	8.72123	4.18276	0.0408373	1	9606	3912	NULL	7	7q22	laminin, beta 1	protein-coding	LAMB1	laminin, beta 1	O	laminin B1 chain|laminin subunit beta-1	LAMB1	NO	#N/A
ENSG00000091137	0.731829	3.07502	25.0329	5.63612e-07	0.00664612	9606	5172	NULL	7	7q31	solute carrier family 26, member 4	protein-coding	SLC26A4	solute carrier family 26, member 4	O	pendrin|sodium-independent chloride/iodi	SLC26A4	NO	#N/A
ENSG00000091140	-0.0478824	6.62295	0.26625	0.605859	1	9606	1738	tcag7.39	7	7q31-q32	dihydrolipoamide dehydrogenase	protein-coding	DLD	dihydrolipoamide dehydrogenase	O	E3 component of pyruvate dehydrogenase c	DLD	NO	#N/A
ENSG00000091157	-0.14499	4.13743	1.90671	0.167329	1	9606	23335	NULL	18	18q21.31	WD repeat domain 7	protein-coding	WDR7	WD repeat domain 7	O	TGF-beta resistance associated|TGF-beta	WDR7	NO	#N/A
ENSG00000091164	-0.0912708	6.03663	1.27968	0.257959	1	9606	9352	NULL	18	18q21.31	thioredoxin-like 1	protein-coding	TXNL1	thioredoxin-like 1	O	32 kDa thioredoxin-related protein|thior	TXNL1	NO	#N/A
ENSG00000091262	0.612174	2.43354	14.9574	0.000109966	1	9606	368	NULL	16	16p13.1	ATP-binding cassette, sub-family C (CFTR/MRP), member 6	protein-coding	ABCC6	ATP-binding cassette, sub-family C (CFTR/MRP), member 6	O	ATP-binding cassette sub-family C member	ABCC6	NO	#N/A
ENSG00000091317	0.200096	7.58229	4.41867	0.0355477	1	9606	54918	NULL	3	3p22.3	CKLF-like MARVEL transmembrane domain containing 6	protein-coding	CMTM6	CKLF-like MARVEL transmembrane domain containing 6	O	CKLF-like MARVEL transmembrane domain-co	CMTM6	NO	#N/A
ENSG00000091409	-0.269326	5.91256	6.52159	0.0106573	1	9606	3655	NULL	2	2q31.1	integrin, alpha 6	protein-coding	ITGA6	integrin, alpha 6	O	CD49 antigen-like family member F|integr	ITGA6	NO	#N/A
ENSG00000091428	-0.0996224	0.168829	0.113432	0.73627	1	9606	11069	NULL	2	2q31-q32	Rap guanine nucleotide exchange factor (GEF) 4	protein-coding	RAPGEF4	Rap guanine nucleotide exchange factor (GEF) 4	O	EPAC 2|RAP guanine-nucleotide-exchange f	RAPGEF4	NO	#N/A
ENSG00000091436	0.23954	6.76514	5.19264	0.0226827	1	#N/A	#N/A	#N/A	#N/A	#N/A	#N/A	#N/A	#N/A	#N/A	#N/A	#N/A	pk	NO	#N/A
ENSG00000091483	-0.364897	6.99387	21.9921	2.73773e-06	0.0314566	9606	2271	NULL	1	1q42.1	fumarate hydratase	protein-coding	FH	fumarate hydratase	O	fumarase|fumarate hydratase, mitochondri	FH	NO	#N/A
ENSG00000091490	-0.0283675	5.95245	0.095257	0.757597	1	9606	23231	NULL	4	4p15.2	sel-1 suppressor of lin-12-like 3 (C. elegans)	protein-coding	SEL1L3	sel-1 suppressor of lin-12-like 3 (C. elegans)	O	protein sel-1 homolog 3|suppressor of li	SEL1L3	NO	#N/A
ENSG00000091527	-0.116956	8.18837	2.45253	0.117336	1	9606	55573	NULL	3	3q22.1	CDV3 homolog (mouse)	protein-coding	CDV3	CDV3 homolog (mouse)	O	carnitine deficiency-associated gene exp	CDV3	NO	#N/A
ENSG00000091542	-0.148909	6.06387	3.6836	0.05495	1	9606	54890	NULL	17	17p11.2|17p11.2	alkB, alkylation repair homolog 5 (E. coli)	protein-coding	ALKBH5	alkB, alkylation repair homolog 5 (E. coli)	O	RNA demethylase ALKBH5|alkylated DNA rep	ALKBH5	NO	#N/A
ENSG00000091592	-0.0542555	3.5395	0.199351	0.655245	1	9606	22861	NULL	17	17p13.2	NLR family, pyrin domain containing 1	protein-coding	NLRP1	NLR family, pyrin domain containing 1	O	NACHT, LRR and PYD containing protein 1|	NLRP1	NO	#N/A
ENSG00000091622	0.224744	1.1702	0.969044	0.324919	1	9606	83394	NULL	17	17p13	PITPNM family member 3	protein-coding	PITPNM3	PITPNM family member 3	O	NIR-1|PITPnm 3|PYK2 N-terminal domain-in	PITPNM3	NO	#N/A
ENSG00000091640	0.116461	4.37055	1.23515	0.266408	1	9606	9552	NULL	17	17p13.2	sperm associated antigen 7	protein-coding	SPAG7	sperm associated antigen 7	O	sperm-associated antigen 7	SPAG7	NO	#N/A
ENSG00000091651	-0.246202	5.88496	7.19512	0.00731022	1	9606	23594	NULL	16	16q12	origin recognition complex, subunit 6	protein-coding	ORC6	origin recognition complex, subunit 6	O	origin recognition complex subunit 6	ORC6	NO	#N/A
ENSG00000091732	-0.0815342	5.30977	0.821223	0.364823	1	9606	51530	HSPC216	7	7q32.2	zinc finger, C3HC-type containing 1	protein-coding	ZC3HC1	zinc finger, C3HC-type containing 1	O	hNIPA|hematopoietic stem/progenitor cell	ZC3HC1	NO	#N/A
ENSG00000091831	0.595928	0.813381	5.37911	0.0203793	1	9606	2099	RP1-130E4.1	6	6q25.1	estrogen receptor 1	protein-coding	ESR1	estrogen receptor 1	O	ER-alpha|estradiol receptor|estrogen nuc	ESR1	NO	#N/A
ENSG00000091844	0.377347	2.68792	7.36795	0.00663966	1	9606	26575	NULL	6	6q25.3	regulator of G-protein signaling 17	protein-coding	RGS17	regulator of G-protein signaling 17	O	NULL	RGS17	NO	#N/A
ENSG00000091947	-0.154525	5.8234	2.44624	0.117807	1	9606	84336	NULL	17	17q21.31	transmembrane protein 101	protein-coding	TMEM101	transmembrane protein 101	O	putative NF-kappa-B-activating protein 1	TMEM101	NO	#N/A
ENSG00000091986	-0.124136	6.40176	2.31458	0.128166	1	9606	151887	HBE245	3	3q13.2	coiled-coil domain containing 80	protein-coding	CCDC80	coiled-coil domain containing 80	O	coiled-coil domain-containing protein 80	CCDC80	NO	#N/A
ENSG00000092010	0.0475855	5.5411	0.355058	0.551264	1	9606	5720	NULL	14	14q11.2	proteasome (prosome, macropain) activator subunit 1 (PA28 alpha)	protein-coding	PSME1	proteasome (prosome, macropain) activator subunit 1 (PA28 alpha)	O	11S regulator complex alpha subunit|11S	PSME1	NO	#N/A
ENSG00000092020	0.0754131	4.11237	0.525161	0.468648	1	9606	55012	NULL	14	14q13.2	protein phosphatase 2, regulatory subunit B'', gamma	protein-coding	PPP2R3C	protein phosphatase 2, regulatory subunit B'', gamma	O	protein phosphatase 2 (formerly 2A), reg	PPP2R3C	NO	#N/A
ENSG00000092036	-0.286431	4.10254	7.15969	0.007456	1	9606	54930	NULL	14	14q11.2	HAUS augmin-like complex, subunit 4	protein-coding	HAUS4	HAUS augmin-like complex, subunit 4	O	HAUS augmin-like complex subunit 4|homol	HAUS4	NO	#N/A
ENSG00000092068	0.411534	2.36361	7.44595	0.00635793	1	9606	23428	NULL	14	14q11.2	solute carrier family 7 (amino acid transporter light chain, L system), member 8	protein-coding	SLC7A8	solute carrier family 7 (amino acid transporter light chain, L system), member 8	O	L-type amino acid transporter 2|integral	SLC7A8	NO	#N/A
ENSG00000092094	-0.326858	3.44554	6.73733	0.00944158	1	9606	55644	NULL	14	14q11.2	O-sialoglycoprotein endopeptidase	protein-coding	OSGEP	O-sialoglycoprotein endopeptidase	O	hOSGEP|probable O-sialoglycoprotein endo	OSGEP	NO	#N/A
ENSG00000092096	0.134549	2.21624	0.618177	0.431726	1	9606	51310	NULL	14	14q11.2	solute carrier family 22, member 17	protein-coding	SLC22A17	solute carrier family 22, member 17	O	24p3 receptor|NGAL receptor|brain-type o	SLC22A17	NO	#N/A
ENSG00000092098	-0.327734	4.77321	10.9868	0.000917639	1	9606	55072	NULL	14	14q11.2	ring finger protein 31	protein-coding	RNF31	ring finger protein 31	O	E3 ubiquitin-protein ligase RNF31|HOIL-1	RNF31	NO	#N/A
ENSG00000092108	0.472206	5.39106	35.2857	2.84713e-09	3.5535e-05	9606	23256	FKSG23	14	14q12	sec1 family domain containing 1	protein-coding	SCFD1	sec1 family domain containing 1	O	SLY1 homolog|sec1 family domain-containi	SCFD1	NO	#N/A
ENSG00000092140	-0.508049	4.54445	25.8784	3.63612e-07	0.00431208	9606	55632	NULL	14	14q12	G2/M-phase specific E3 ubiquitin protein ligase	protein-coding	G2E3	G2/M-phase specific E3 ubiquitin protein ligase	O	G2/M phase-specific E3 ubiquitin-protein	G2E3	NO	#N/A
ENSG00000092148	-0.350755	6.44799	10.4219	0.0012453	1	9606	25831	NULL	14	14q12	HECT domain containing E3 ubiquitin protein ligase 1	protein-coding	HECTD1	HECT domain containing E3 ubiquitin protein ligase 1	O	E3 ligase for inhibin receptor|E3 ubiqui	HECTD1	NO	#N/A
ENSG00000092199	-0.330204	8.97384	23.3645	1.34027e-06	0.0155927	9606	3183	NULL	14	14q11.2	heterogeneous nuclear ribonucleoprotein C (C1/C2)	protein-coding	HNRNPC	heterogeneous nuclear ribonucleoprotein C (C1/C2)	O	heterogeneous nuclear ribonucleoproteins	HNRNPC	NO	#N/A
ENSG00000092201	0.106063	8.09982	2.21519	0.136658	1	9606	11198	NULL	14	14q11.2	suppressor of Ty 16 homolog (S. cerevisiae)	protein-coding	SUPT16H	suppressor of Ty 16 homolog (S. cerevisiae)	O	FACT 140 kDa subunit|FACT complex subuni	SUPT16H	NO	#N/A
ENSG00000092203	-0.280131	5.35736	9.85601	0.00169277	1	9606	9878	NULL	14	14q11.2	TOX high mobility group box family member 4	protein-coding	TOX4	TOX high mobility group box family member 4	O	epidermal Langerhans cell protein LCP1|m	TOX4	NO	#N/A
ENSG00000092208	0.111414	2.94887	0.667908	0.413782	1	9606	8487	NULL	14	14q13	gem (nuclear organelle) associated protein 2	protein-coding	GEMIN2	gem (nuclear organelle) associated protein 2	O	SMN interacting protein 1-delta|componen	GEMIN2	NO	#N/A
ENSG00000092330	0.548377	4.20207	30.8477	2.79095e-08	0.000341193	9606	26277	NULL	14	14q12	TERF1 (TRF1)-interacting nuclear factor 2	protein-coding	TINF2	TERF1 (TRF1)-interacting nuclear factor 2	O	TERF1-interacting nuclear factor 2|TRF1-	TINF2	NO	#N/A
ENSG00000092439	0.310312	6.22599	12.2116	0.000474926	1	9606	54822	NULL	15	15q21	transient receptor potential cation channel, subfamily M, member 7	protein-coding	TRPM7	transient receptor potential cation channel, subfamily M, member 7	O	LTRPC ion channel family member 7|LTrpC-	TRPM7	NO	#N/A
ENSG00000092445	-0.369225	5.39727	14.8335	0.000117431	1	9606	7301	NULL	15	15q15	TYRO3 protein tyrosine kinase	protein-coding	TYRO3	TYRO3 protein tyrosine kinase	O	tyrosine-protein kinase DTK|tyrosine-pro	TYRO3	NO	#N/A
ENSG00000092470	0.13455	5.39579	2.63115	0.104786	1	9606	79968	NULL	15	15q15.3	WD repeat domain 76	protein-coding	WDR76	WD repeat domain 76	O	WD repeat-containing protein 76	WDR76	NO	#N/A
ENSG00000092531	0.298574	5.37954	11.5682	0.000670894	1	9606	8773	NULL	15	15q14	synaptosomal-associated protein, 23kDa	protein-coding	SNAP23	synaptosomal-associated protein, 23kDa	O	synaptosomal-associated protein 23|vesic	SNAP23	NO	#N/A
ENSG00000092621	-0.4846	6.63901	33.4151	7.44422e-09	9.22786e-05	9606	26227	RP4-683H9.1	1	1p12	phosphoglycerate dehydrogenase	protein-coding	PHGDH	phosphoglycerate dehydrogenase	O	3-phosphoglycerate dehydrogenase|D-3-pho	PHGDH	NO	#N/A
ENSG00000092758	0.214002	0.240394	0.544574	0.460543	1	9606	1299	RP5-885L7.6	20	20q13.3	collagen, type IX, alpha 3	protein-coding	COL9A3	collagen, type IX, alpha 3	O	collagen IX, alpha-3 polypeptide|collage	COL9A3	NO	#N/A
ENSG00000092820	0.0781728	8.78601	1.45305	0.228039	1	9606	7430	NULL	6	6q25.3	ezrin	protein-coding	EZR	ezrin	O	cytovillin 2|p81|villin 2 (ezrin)|villin	EZR	NO	#N/A
ENSG00000092841	0.0324134	7.91464	0.0584513	0.808961	1	9606	4637	NULL	12	12q13.2	myosin, light chain 6, alkali, smooth muscle and non-muscle	protein-coding	MYL6	myosin, light chain 6, alkali, smooth muscle and non-muscle	O	17 kDa myosin light chain|myosin light c	MYL6	NO	#N/A
ENSG00000092847	-0.236481	6.11582	8.20579	0.00417569	1	9606	26523	RP4-789D17.1	1	1p34.3	argonaute RISC catalytic component 1	protein-coding	AGO1	argonaute RISC catalytic component 1	O	Golgi Endoplasmic Reticulum protein 95 k	AGO1	NO	#N/A
ENSG00000092853	0.126478	5.98014	1.14924	0.283709	1	9606	63967	NULL	1	1p34.2	claspin	protein-coding	CLSPN	claspin	O	claspin homolog|hClaspin	CLSPN	NO	#N/A
ENSG00000092871	-0.125372	3.9232	1.34167	0.24674	1	9606	117584	NULL	17	17q12	ring finger and FYVE-like domain containing E3 ubiquitin protein ligase	protein-coding	RFFL	ring finger and FYVE-like domain containing E3 ubiquitin protein ligase	O	E3 ubiquitin-protein ligase rififylin|FY	RFFL	NO	#N/A
ENSG00000092929	0.672587	1.8241	14.4642	0.000142846	1	9606	201294	NULL	17	17q25.1	unc-13 homolog D (C. elegans)	protein-coding	UNC13D	unc-13 homolog D (C. elegans)	O	protein unc-13 homolog D	UNC13D	NO	#N/A
ENSG00000092931	-0.572651	5.43195	41.5665	1.1393e-10	1.45318e-06	9606	79157	NULL	17	17q25	major facilitator superfamily domain containing 11	protein-coding	MFSD11	major facilitator superfamily domain containing 11	O	UNC93-like protein MFSD11|major facilita	MFSD11	NO	#N/A
ENSG00000092964	-0.927745	6.84602	157.715	3.57252e-36	4.9315e-32	9606	1808	NULL	8	8p22-p21	dihydropyrimidinase-like 2	protein-coding	DPYSL2	dihydropyrimidinase-like 2	O	collapsin response mediator protein hCRM	DPYSL2	NO	#N/A
ENSG00000092969	-0.161059	2.85518	1.27824	0.258227	1	9606	7042	NULL	1	1q41	transforming growth factor, beta 2	protein-coding	TGFB2	transforming growth factor, beta 2	O	BSC-1 cell growth inhibitor|G-TSF|ceterm	TGFB2	NO	#N/A
ENSG00000092978	0.368053	5.38997	18.395	1.79524e-05	0.198195	9606	55105	NULL	1	1q41	G patch domain containing 2	protein-coding	GPATCH2	G patch domain containing 2	O	G patch domain-containing protein 2|canc	GPATCH2	NO	#N/A
ENSG00000093000	-0.387386	6.25119	17.3867	3.04947e-05	0.331844	9606	10762	CTA-268H5.7	22	22q13.31	nucleoporin 50kDa	protein-coding	NUP50	nucleoporin 50kDa	O	50 kDa nucleoporin|nuclear pore complex	NUP50	NO	#N/A
ENSG00000093009	-0.0680949	5.39615	0.542005	0.461603	1	9606	8318	UNQ374/PRO710	22	22q11.21	cell division cycle 45	protein-coding	CDC45	cell division cycle 45	O	CDC45 cell division cycle 45 homolog|CDC	CDC45	NO	#N/A
ENSG00000093010	-0.367509	5.81204	18.7322	1.50417e-05	0.166722	9606	1312	NULL	22	22q11.21	catechol-O-methyltransferase	protein-coding	COMT	catechol-O-methyltransferase	O	catechol O-methyltransferase	COMT	NO	#N/A
ENSG00000093072	0.517167	5.11796	25.788	3.81058e-07	0.00451553	9606	51816	NULL	22	22q11.2	cat eye syndrome chromosome region, candidate 1	protein-coding	CECR1	cat eye syndrome chromosome region, candidate 1	O	adenosine deaminase 2|adenosine deaminas	CECR1	NO	#N/A
ENSG00000093144	-0.301509	6.20775	17.7893	2.46767e-05	0.26989	9606	55862	RP3-351K20.2	6	6q22.33	enoyl CoA hydratase domain containing 1	protein-coding	ECHDC1	enoyl CoA hydratase domain containing 1	O	enoyl Coenzyme A hydratase domain contai	ECHDC1	NO	#N/A
ENSG00000093167	-0.166512	5.52668	2.43771	0.118449	1	9606	9209	NULL	3	3p22.2	leucine rich repeat (in FLII) interacting protein 2	protein-coding	LRRFIP2	leucine rich repeat (in FLII) interacting protein 2	O	LRR FLII-interacting protein 2|leucine-r	LRRFIP2	NO	#N/A
ENSG00000093183	0.0264524	6.27358	0.119342	0.729749	1	9606	9117	UNQ459/PRO784	3	3p22.1	SEC22 vesicle trafficking protein homolog C (S. cerevisiae)	protein-coding	SEC22C	SEC22 vesicle trafficking protein homolog C (S. cerevisiae)	O	SEC22 vesicle trafficking protein-like 3	SEC22C	NO	#N/A
ENSG00000093217	0.407918	4.11294	14.2737	0.000158058	1	9606	9942	NULL	3	3p22-p21.3	xylulokinase homolog (H. influenzae)	protein-coding	XYLB	xylulokinase homolog (H. influenzae)	O	xylulose kinase	XYLB	NO	#N/A
ENSG00000094631	-0.233557	4.68013	5.33128	0.020946	1	9606	10013	JM21	X	Xp11.23	histone deacetylase 6	protein-coding	HDAC6	histone deacetylase 6	O	NULL	HDAC6	NO	#N/A
ENSG00000094804	0.0130831	7.37247	0.035775	0.849981	1	9606	990	NULL	17	17q21.3	cell division cycle 6	protein-coding	CDC6	cell division cycle 6	O	CDC6 cell division cycle 6 homolog|CDC6-	CDC6	NO	#N/A
ENSG00000094841	-0.315402	3.70226	7.06935	0.00784136	1	9606	139596	RP11-311P8.3	X	Xq13.3	uracil phosphoribosyltransferase (FUR1) homolog (S. cerevisiae)	protein-coding	UPRT	uracil phosphoribosyltransferase (FUR1) homolog (S. cerevisiae)	O	UMP pyrophosphorylase|UPRTase|uracil pho	UPRT	NO	#N/A
ENSG00000094880	0.123153	5.36825	1.71311	0.190583	1	9606	8697	NULL	5	5q31	cell division cycle 23	protein-coding	CDC23	cell division cycle 23	O	anaphase promoting complex subunit 8|ana	CDC23	NO	#N/A
ENSG00000094914	-0.359643	5.72672	17.1688	3.42017e-05	0.370883	9606	8086	GL003	12	12q13	achalasia, adrenocortical insufficiency, alacrimia	protein-coding	AAAS	achalasia, adrenocortical insufficiency, alacrimia	O	Allgrove, triple-A|aladin	AAAS	NO	#N/A
ENSG00000094916	0.574171	8.11969	49.6437	1.84363e-12	2.39801e-08	9606	23468	NULL	12	12q13.13	chromobox homolog 5	protein-coding	CBX5	chromobox homolog 5	O	HP1 alpha homolog|HP1-ALPHA|HP1Hs alpha|	CBX5	NO	#N/A
ENSG00000094975	-0.161499	5.77978	2.96649	0.0850062	1	9606	51430	NULL	1	1q24	SUN domain containing ossification factor	protein-coding	SUCO	SUN domain containing ossification factor	O	SUN domain-containing ossification facto	SUCO	NO	#N/A
ENSG00000095002	-0.00991355	6.28741	0.0172135	0.895617	1	9606	4436	NULL	2	2p21	mutS homolog 2, colon cancer, nonpolyposis type 1 (E. coli)	protein-coding	MSH2	mutS homolog 2, colon cancer, nonpolyposis type 1 (E. coli)	O	DNA mismatch repair protein Msh2|hMSH2	MSH2	NO	#N/A
ENSG00000095015	0.286533	3.12365	5.25019	0.0219444	1	9606	4214	NULL	5	5q11.2	mitogen-activated protein kinase kinase kinase 1, E3 ubiquitin protein ligase	protein-coding	MAP3K1	mitogen-activated protein kinase kinase kinase 1, E3 ubiquitin protein ligase	O	MAP/ERK kinase kinase 1|MAPK/ERK kinase	MAP3K1	NO	#N/A
ENSG00000095059	-0.358046	5.63136	14.3304	0.000153365	1	9606	1725	NULL	19	19p13.2	deoxyhypusine synthase	protein-coding	DHPS	deoxyhypusine synthase	O	migration-inducing gene 13	DHPS	NO	#N/A
ENSG00000095066	0.739393	3.82308	42.2418	8.06587e-11	1.03074e-06	9606	29911	NULL	19	19p13.2	hook homolog 2 (Drosophila)	protein-coding	HOOK2	hook homolog 2 (Drosophila)	O	h-hook2|hHK2|protein Hook homolog 2	HOOK2	NO	#N/A
ENSG00000095139	0.00421616	8.1864	0.00207088	0.963703	1	9606	372	NULL	11	11q23.3	archain 1	protein-coding	ARCN1	archain 1	O	archain vesicle transport protein 1|coat	ARCN1	NO	#N/A
ENSG00000095209	0.283268	6.03168	12.5637	0.000393321	1	9606	55151	RP11-219P18.1	9	9q31.2	transmembrane protein 38B	protein-coding	TMEM38B	transmembrane protein 38B	O	trimeric intracellular cation channel ty	TMEM38B	NO	#N/A
ENSG00000095261	-0.255873	6.04162	9.84302	0.00170478	1	9606	5711	RP11-27I1.5	9	9q33.2	proteasome (prosome, macropain) 26S subunit, non-ATPase, 5	protein-coding	PSMD5	proteasome (prosome, macropain) 26S subunit, non-ATPase, 5	O	26S protease subunit S5 basic|26S protea	PSMD5	NO	#N/A
ENSG00000095303	0.130786	2.1248	0.634986	0.425532	1	9606	5742	RP11-542K23.6	9	9q32-q33.3	prostaglandin-endoperoxide synthase 1 (prostaglandin G/H synthase and cyclooxygenase)	protein-coding	PTGS1	prostaglandin-endoperoxide synthase 1 (prostaglandin G/H synthase and cyclooxygenase)	O	PGH synthase 1|cyclooxygenase-1|prostagl	PTGS1	NO	#N/A
ENSG00000095319	-0.237885	7.94407	11.2429	0.000799266	1	9606	23511	RP11-167N5.2	9	9q34.11	nucleoporin 188kDa	protein-coding	NUP188	nucleoporin 188kDa	O	nucleoporin NUP188 homolog	NUP188	NO	#N/A
ENSG00000095321	-0.193132	5.11579	5.40847	0.0200392	1	9606	1384	RP11-247A12.5	9	9q34.1	carnitine O-acetyltransferase	protein-coding	CRAT	carnitine O-acetyltransferase	O	CAT|carnitine acetylase|carnitine acetyl	CRAT	NO	#N/A
ENSG00000095380	-0.0977091	5.83075	1.31452	0.251578	1	9606	54187	RP11-404F11.3	9	9p24.1-p23	N-acetylneuraminic acid synthase	protein-coding	NANS	N-acetylneuraminic acid synthase	O	N-acetylneuraminate synthase|N-acetylneu	NANS	NO	#N/A
ENSG00000095383	0.122543	5.00112	1.78515	0.181519	1	9606	55357	RP11-404F11.2	9	9q22.33	TBC1 domain family, member 2	protein-coding	TBC1D2	TBC1 domain family, member 2	O	TBC1 domain family member 2A|TBC1 domain	TBC1D2	NO	#N/A
ENSG00000095397	0.624841	3.77518	25.712	3.96353e-07	0.0046952	9606	25861	RP11-9M16.1	9	9q32	deafness, autosomal recessive 31	protein-coding	DFNB31	deafness, autosomal recessive 31	O	CASK-interacting protein CIP98|autosomal	DFNB31	NO	#N/A
ENSG00000095485	-0.220426	4.87713	6.25288	0.0123992	1	9606	55280	RP11-316M21.3	10	10q24.31	CWF19-like 1, cell cycle control (S. pombe)	protein-coding	CWF19L1	CWF19-like 1, cell cycle control (S. pombe)	O	CWF19-like protein 1	CWF19L1	NO	#N/A
ENSG00000095539	0.630607	2.83316	20.5207	5.89884e-06	0.0667277	9606	57715	RP11-108L7.1	10	10q24.31	sema domain, immunoglobulin domain (Ig), transmembrane domain (TM) and short cytoplasmic domain, (semaphorin) 4G	protein-coding	SEMA4G	sema domain, immunoglobulin domain (Ig), transmembrane domain (TM) and short cytoplasmic domain, (semaphorin) 4G	O	semaphorin-4G	SEMA4G	NO	#N/A
ENSG00000095564	0.274756	6.20456	8.57563	0.00340691	1	9606	9044	NULL	10	10q22-q23	BTAF1 RNA polymerase II, B-TFIID transcription factor-associated, 170kDa	protein-coding	BTAF1	BTAF1 RNA polymerase II, B-TFIID transcription factor-associated, 170kDa	O	ATP-dependent helicase BTAF1|B-TFIID tra	BTAF1	NO	#N/A
ENSG00000095574	0.23852	4.38105	5.60831	0.0178755	1	9606	64376	NULL	10	10q26	IKAROS family zinc finger 5 (Pegasus)	protein-coding	IKZF5	IKAROS family zinc finger 5 (Pegasus)	O	zinc finger protein Pegasus|zinc finger	IKZF5	NO	#N/A
ENSG00000095637	0.423061	1.30453	4.26206	0.0389725	1	9606	10580	RP11-476E15.1	10	10q23.33	sorbin and SH3 domain containing 1	protein-coding	SORBS1	sorbin and SH3 domain containing 1	O	Fas-ligand associated factor 2|SH3 domai	SORBS1	NO	#N/A
ENSG00000095739	0.0972429	3.72598	0.396795	0.528749	1	9606	25805	NULL	10	10p12.3-p11.2	BMP and activin membrane-bound inhibitor homolog (Xenopus laevis)	protein-coding	BAMBI	BMP and activin membrane-bound inhibitor homolog (Xenopus laevis)	O	BMP and activin membrane-bound inhibitor	BAMBI	NO	#N/A
ENSG00000095752	1.41045	4.87596	151.752	7.17898e-35	9.90125e-31	9606	3589	NULL	19	19q13.3-q13.4	interleukin 11	protein-coding	IL11	interleukin 11	O	adipogenesis inhibitory factor|interleuk	IL11	UP	IL11
ENSG00000095787	-0.161164	7.19641	3.17258	0.0748839	1	9606	51322	RP11-48B24.1	10	10p12.1|10p12.1-p11.2	WW domain containing adaptor with coiled-coil	protein-coding	WAC	WW domain containing adaptor with coiled-coil	O	WW domain-containing adapter protein wit	WAC	NO	#N/A
ENSG00000095794	0.189637	4.65485	3.95785	0.0466534	1	9606	1390	RP11-324I22.1	10	10p11.21	cAMP responsive element modulator	protein-coding	CREM	cAMP responsive element modulator	O	CREM 2alpha-b protein|CREM 2beta-a prote	CREM	NO	#N/A
ENSG00000095906	-1.34858	5.95227	118.342	1.45921e-27	1.99999e-23	9606	10101	NULL	16	16p13.3	nucleotide binding protein 2	protein-coding	NUBP2	nucleotide binding protein 2	O	C447E6.1 (nucleotide binding protein 1 (	NUBP2	DOWN	NUBP2
ENSG00000095951	-0.222945	3.93723	2.67276	0.102079	1	9606	3096	RP3-451B15.2	6	6p24-p22.3	human immunodeficiency virus type I enhancer binding protein 1	protein-coding	HIVEP1	human immunodeficiency virus type I enhancer binding protein 1	O	GAAP|HIV-EP1|Zinc finger protein 40 (Hum	HIVEP1	NO	#N/A
ENSG00000096060	-0.0635159	6.04295	0.46875	0.493563	1	9606	2289	RP3-340B19.6	6	6p21.31	FK506 binding protein 5	protein-coding	FKBP5	FK506 binding protein 5	O	51 kDa FK506-binding protein 5|51 kDa FK	FKBP5	NO	#N/A
ENSG00000096063	-0.569034	6.83564	35.8314	2.15152e-09	2.69263e-05	9606	6732	RP3-422H11.1	6	6p21.31	SRSF protein kinase 1	protein-coding	SRPK1	SRSF protein kinase 1	O	SFRS protein kinase 1|SR-protein-specifi	SRPK1	NO	#N/A
ENSG00000096070	-0.0856256	6.30918	1.21664	0.270021	1	9606	27154	RP3-524E15.1	6	6p21	bromodomain and PHD finger containing, 3	protein-coding	BRPF3	bromodomain and PHD finger containing, 3	O	bromodomain and PHD finger-containing pr	BRPF3	NO	#N/A
ENSG00000096080	-0.141677	4.7206	1.47705	0.224237	1	9606	55168	RP1-261G23.2	6	6p21.3	mitochondrial ribosomal protein S18A	protein-coding	MRPS18A	mitochondrial ribosomal protein S18A	O	28S ribosomal protein S18-3, mitochondri	MRPS18A	NO	#N/A
ENSG00000096092	0.143634	3.90824	1.7397	0.187177	1	9606	28978	PTD011	6	6p12.2	transmembrane protein 14A	protein-coding	TMEM14A	transmembrane protein 14A	O	NULL	TMEM14A	NO	#N/A
ENSG00000096093	0.655306	4.07051	36.3909	1.61456e-09	2.02498e-05	9606	114327	NULL	6	6p12.3	EF-hand domain (C-terminal) containing 1	protein-coding	EFHC1	EF-hand domain (C-terminal) containing 1	O	EF-hand domain-containing protein 1|myoc	EFHC1	NO	#N/A
ENSG00000096384	-0.587564	11.0771	95.4635	1.50643e-22	2.04753e-18	9606	3326	RP1-302G2.1	6	6p12	heat shock protein 90kDa alpha (cytosolic), class B member 1	protein-coding	HSP90AB1	heat shock protein 90kDa alpha (cytosolic), class B member 1	O	HSP90-beta|heat shock 84 kDa|heat shock	HSP90AB1	NO	#N/A
ENSG00000096401	0.0239447	6.16149	0.0937536	0.759458	1	9606	988	RP1-319D22.1	6	6p21	cell division cycle 5-like	protein-coding	CDC5L	cell division cycle 5-like	O	CDC5 cell division cycle 5-like|Cdc5-rel	CDC5L	NO	#N/A
ENSG00000096433	-0.240162	7.67109	7.66408	0.0056331	1	9606	3710	NULL	6	6p21	inositol 1,4,5-trisphosphate receptor, type 3	protein-coding	ITPR3	inositol 1,4,5-trisphosphate receptor, type 3	O	IP3 receptor|inositol 1,4,5-triphosphate	ITPR3	NO	#N/A
ENSG00000096654	0.000417723	3.26546	1.05456e-05	0.997409	1	9606	7738	NULL	6	6p21.3	zinc finger protein 184	protein-coding	ZNF184	zinc finger protein 184	O	zinc finger protein 184 (Kruppel-like)	ZNF184	NO	#N/A
ENSG00000096717	0.249086	4.86521	5.607	0.0178889	1	9606	23411	RP11-57G10.3	10	10q21.3	sirtuin 1	protein-coding	SIRT1	sirtuin 1	O	NAD-dependent deacetylase sirtuin-1|NAD-	SIRT1	NO	#N/A
ENSG00000096746	-0.354966	7.41785	17.6751	2.62038e-05	0.28625	9606	3189	NULL	10	10q22	heterogeneous nuclear ribonucleoprotein H3 (2H9)	protein-coding	HNRNPH3	heterogeneous nuclear ribonucleoprotein H3 (2H9)	O	heterogeneous nuclear ribonucleoprotein	HNRNPH3	NO	#N/A
ENSG00000096872	-0.237275	2.91819	2.90428	0.0883449	1	9606	80173	NULL	9	9p21.2	intraflagellar transport 74 homolog (Chlamydomonas)	protein-coding	IFT74	intraflagellar transport 74 homolog (Chlamydomonas)	O	capillary morphogenesis gene 1 protein|c	IFT74	NO	#N/A
ENSG00000096968	0.0825075	3.75603	0.365635	0.545393	1	9606	3717	NULL	9	9p24	Janus kinase 2	protein-coding	JAK2	Janus kinase 2	O	JAK-2|Janus kinase 2 (a protein tyrosine	JAK2	NO	#N/A
ENSG00000096996	0.300644	2.25598	3.48154	0.0620569	1	9606	3594	NULL	19	19p13.1	interleukin 12 receptor, beta 1	protein-coding	IL12RB1	interleukin 12 receptor, beta 1	O	IL-12 receptor beta component|IL-12 rece	IL12RB1	NO	#N/A
ENSG00000097007	-0.167425	7.64681	6.20486	0.01274	1	9606	25	RP11-83J21.1	9	9q34.1	c-abl oncogene 1, non-receptor tyrosine kinase	protein-coding	ABL1	c-abl oncogene 1, non-receptor tyrosine kinase	O	Abelson tyrosine-protein kinase 1|bcr/c-	ABL1	NO	#N/A
ENSG00000097021	-0.758697	6.39508	66.4157	3.65184e-16	4.86206e-12	9606	11332	RP1-120G22.10-004	1	1p36	acyl-CoA thioesterase 7	protein-coding	ACOT7	acyl-CoA thioesterase 7	O	CTE-IIa|acyl-CoA thioesterase 2|acyl-CoA	ACOT7	NO	#N/A
ENSG00000097033	0.0422817	6.42847	0.259188	0.610678	1	9606	51100	CGI-61	1	1p22	SH3-domain GRB2-like endophilin B1	protein-coding	SH3GLB1	SH3-domain GRB2-like endophilin B1	O	Bax-interacting factor 1|SH3 domain-cont	SH3GLB1	NO	#N/A
ENSG00000097046	0.133699	5.02232	1.8002	0.179688	1	9606	8317	NULL	1	1p22	cell division cycle 7	protein-coding	CDC7	cell division cycle 7	O	CDC7 (cell division cycle 7, S. cerevisi	CDC7	NO	#N/A
ENSG00000097096	0.477129	3.39265	10.1831	0.00141737	1	9606	84144	NULL	1	1p22.3	synapse defective 1, Rho GTPase, homolog 2 (C. elegans)	protein-coding	SYDE2	synapse defective 1, Rho GTPase, homolog 2 (C. elegans)	O	protein syd-1 homolog 2|rho GTPase-activ	SYDE2	NO	#N/A
ENSG00000099194	-0.323584	8.4422	21.1529	4.24066e-06	0.0483605	9606	6319	PRO1933	10	10q24.31	stearoyl-CoA desaturase (delta-9-desaturase)	protein-coding	SCD	stearoyl-CoA desaturase (delta-9-desaturase)	O	acyl-CoA desaturase|delta(9)-desaturase|	SCD	NO	#N/A
ENSG00000099203	0.247353	4.87708	3.63784	0.0564802	1	9606	11018	NULL	19	19p13.2	transmembrane emp24 protein transport domain containing 1	protein-coding	TMED1	transmembrane emp24 protein transport domain containing 1	O	IL1RL1-binding protein|T1/ST2 receptor b	TMED1	NO	#N/A
ENSG00000099204	0.493497	6.04084	21.9409	2.81179e-06	0.0322962	9606	3983	RP11-317F20.1	10	10q25	actin binding LIM protein 1	protein-coding	ABLIM1	actin binding LIM protein 1	O	actin-binding LIM protein 1|actin-bindin	ABLIM1	NO	#N/A
ENSG00000099219	-0.148943	4.11599	2.18512	0.139351	1	9606	79956	RP11-207C16.6	9	9p24	endoplasmic reticulum metallopeptidase 1	protein-coding	ERMP1	endoplasmic reticulum metallopeptidase 1	O	Felix-ina|aminopeptidase Fxna|bA207C16.3	ERMP1	NO	#N/A
ENSG00000099246	0.102732	5.75892	1.37824	0.240402	1	9606	22931	RP11-148B2.1	10	10p12.1	RAB18, member RAS oncogene family	protein-coding	RAB18	RAB18, member RAS oncogene family	O	RAB18 small GTPase|ras-related protein R	RAB18	NO	#N/A
ENSG00000099250	-0.413	7.44224	28.174	1.10886e-07	0.00133595	9606	8829	RP11-342D11.1	10	10p12	neuropilin 1	protein-coding	NRP1	neuropilin 1	O	neuropilin-1|transmembrane receptor|vasc	NRP1	NO	#N/A
ENSG00000099256	0.609627	3.83943	22.1774	2.48581e-06	0.0286216	9606	56952	RP11-129O7.1	10	10p12.1	phosphoribosyl transferase domain containing 1	protein-coding	PRTFDC1	phosphoribosyl transferase domain containing 1	O	phosphoribosyltransferase domain-contain	PRTFDC1	NO	#N/A
ENSG00000099260	0.0151501	0.471682	0.00324125	0.954599	1	9606	54873	NULL	1	1p22-p21	palmdelphin	protein-coding	PALMD	palmdelphin	O	paralemnin-like protein	PALMD	NO	#N/A
ENSG00000099282	0.29712	4.19754	5.17027	0.0229767	1	9606	23555	UNQ677/PRO1311	10	10q22.1	tetraspanin 15	protein-coding	TSPAN15	tetraspanin 15	O	tetraspan NET-7|tetraspanin-15|transmemb	TSPAN15	NO	#N/A
ENSG00000099284	-0.804345	2.20868	24.8386	6.23368e-07	0.00734141	9606	55506	RP11-367H5.3	10	10q22.1	H2A histone family, member Y2	protein-coding	H2AFY2	H2A histone family, member Y2	O	core histone macro-H2A.2|core histone ma	H2AFY2	NO	#N/A
ENSG00000099290	0.415328	6.33474	22.7536	1.84158e-06	0.0213089	9606	387680	RP11-56A21.1	10	10q11.23	family with sequence similarity 21, member A	protein-coding	FAM21A	family with sequence similarity 21, member A	O	WASH complex subunit FAM21A	FAM21A	NO	#N/A
ENSG00000099308	0.130183	3.93961	1.03252	0.309569	1	9606	23031	NULL	19	19p13.11	microtubule associated serine/threonine kinase 3	protein-coding	MAST3	microtubule associated serine/threonine kinase 3	O	microtubule-associated serine/threonine-	MAST3	NO	#N/A
ENSG00000099326	0.779229	5.34701	62.5417	2.60856e-15	3.45869e-11	9606	7593	NULL	19	19q13.4	myeloid zinc finger 1	protein-coding	MZF1	myeloid zinc finger 1	O	zinc finger and SCAN domain-containing p	MZF1	NO	#N/A
ENSG00000099330	0.768729	2.29424	23.5792	1.19875e-06	0.0139727	9606	79629	NULL	19	19p13.11	occludin/ELL domain containing 1	protein-coding	OCEL1	occludin/ELL domain containing 1	O	occludin/ELL domain-containing protein 1	OCEL1	NO	#N/A
ENSG00000099331	-0.726953	6.43334	82.2306	1.21101e-19	1.63413e-15	9606	4650	NULL	19	19p13.1	myosin IXB	protein-coding	MYO9B	myosin IXB	O	myosin-IXb|unconventional myosin IXb|unc	MYO9B	NO	#N/A
ENSG00000099341	-0.124464	7.38857	1.93949	0.163724	1	9606	5714	NULL	19	19q13.2	proteasome (prosome, macropain) 26S subunit, non-ATPase, 8	protein-coding	PSMD8	proteasome (prosome, macropain) 26S subunit, non-ATPase, 8	O	26S proteasome non-ATPase regulatory sub	PSMD8	NO	#N/A
ENSG00000099364	-0.777697	6.5056	40.7173	1.75926e-10	2.23602e-06	9606	54620	NULL	16	16p11.2	F-box and leucine-rich repeat protein 19	protein-coding	FBXL19	F-box and leucine-rich repeat protein 19	O	F-box/LRR-repeat protein 19|jumonji C do	FBXL19	NO	#N/A
ENSG00000099365	1.1316	4.08791	98.6715	2.98055e-23	4.05623e-19	9606	112755	NULL	16	16p11.2	syntaxin 1B	protein-coding	STX1B	syntaxin 1B	O	FP17469|syntaxin 1B1|syntaxin 1B2|syntax	STX1B	UP	STX1B
ENSG00000099377	0.77227	3.68397	32.6988	1.07601e-08	0.000132887	9606	80270	NULL	16	16p11.2	hydroxy-delta-5-steroid dehydrogenase, 3 beta- and steroid delta-isomerase 7	protein-coding	HSD3B7	hydroxy-delta-5-steroid dehydrogenase, 3 beta- and steroid delta-isomerase 7	O	3 beta-hydroxy-delta 5-C27-steroid oxido	HSD3B7	NO	#N/A
ENSG00000099381	-0.10603	6.53717	1.66645	0.196735	1	9606	9739	NULL	16	16p11.2	SET domain containing 1A	protein-coding	SETD1A	SET domain containing 1A	O	SET domain-containing protein 1A|hSET1A|	SETD1A	NO	#N/A
ENSG00000099385	-0.157108	5.40311	1.43354	0.231187	1	9606	9274	NULL	16	16p11	B-cell CLL/lymphoma 7C	protein-coding	BCL7C	B-cell CLL/lymphoma 7C	O	B-cell CLL/lymphoma 7 protein family mem	BCL7C	NO	#N/A
ENSG00000099622	-0.54784	5.38046	32.8041	1.01927e-08	0.000125941	9606	1153	NULL	19	19p13.3	cold inducible RNA binding protein	protein-coding	CIRBP	cold inducible RNA binding protein	O	A18 hnRNP|cold inducible RNA-binding pro	CIRBP	NO	#N/A
ENSG00000099624	-0.491957	5.88993	21.8714	2.91541e-06	0.0334718	9606	513	NULL	19	19p13.3	ATP synthase, H+ transporting, mitochondrial F1 complex, delta subunit	protein-coding	ATP5D	ATP synthase, H+ transporting, mitochondrial F1 complex, delta subunit	O	ATP synthase subunit delta, mitochondria	ATP5D	NO	#N/A
ENSG00000099625	-0.170339	2.19403	1.10871	0.292362	1	9606	255057	NULL	19	19p13.3	chromosome 19 open reading frame 26	protein-coding	C19orf26	chromosome 19 open reading frame 26	O	downstream of Stk11|protein Dos	C19orf26	NO	#N/A
ENSG00000099783	-0.465997	8.60926	33.72	6.36437e-09	7.902e-05	9606	4670	NULL	19	19p13.3-p13.2	heterogeneous nuclear ribonucleoprotein M	protein-coding	HNRNPM	heterogeneous nuclear ribonucleoprotein M	O	CEA receptor|N-acetylglucosamine recepto	HNRNPM	NO	#N/A
ENSG00000099785	0.653988	2.04861	14.1916	0.00016511	1	9606	51257	HSPC240	19	19p13.2	membrane-associated ring finger (C3HC4) 2, E3 ubiquitin protein ligase	protein-coding	MARCH2	membrane-associated ring finger (C3HC4) 2, E3 ubiquitin protein ligase	O	E3 ubiquitin-protein ligase MARCH2|RING	MARCH2	NO	#N/A
ENSG00000099795	-0.181809	5.79876	2.75549	0.0969208	1	9606	4713	NULL	19	19p13.12	NADH dehydrogenase (ubiquinone) 1 beta subcomplex, 7, 18kDa	protein-coding	NDUFB7	NADH dehydrogenase (ubiquinone) 1 beta subcomplex, 7, 18kDa	O	NADH dehydrogenase [ubiquinone] 1 beta s	NDUFB7	NO	#N/A
ENSG00000099797	-0.387069	6.53793	20.5147	5.91763e-06	0.0669343	9606	9524	NULL	19	19p13.12	trans-2,3-enoyl-CoA reductase	protein-coding	TECR	trans-2,3-enoyl-CoA reductase	O	glycoprotein, synaptic 2|synaptic glycop	TECR	NO	#N/A
ENSG00000099800	-0.424201	6.27128	9.26183	0.00233979	1	9606	26517	NULL	19	19p13.3	translocase of inner mitochondrial membrane 13 homolog (yeast)	protein-coding	TIMM13	translocase of inner mitochondrial membrane 13 homolog (yeast)	O	mitochondrial import inner membrane tran	TIMM13	NO	#N/A
ENSG00000099804	-0.651066	5.78293	23.1375	1.5082e-06	0.0175132	9606	997	NULL	19	19p13.3	cell division cycle 34	protein-coding	CDC34	cell division cycle 34	O	cell division cycle 34 homolog|ubiquitin	CDC34	NO	#N/A
ENSG00000099810	-0.0941345	5.95407	1.06367	0.302381	1	9606	4507	NULL	9	9p21	methylthioadenosine phosphorylase	protein-coding	MTAP	methylthioadenosine phosphorylase	O	5'-methylthioadenosine phosphorylase|MTA	MTAP	NO	#N/A
ENSG00000099814	0.171837	4.58312	2.42195	0.119646	1	9606	283638	NULL	14	14q32.33	centrosomal protein 170B	protein-coding	CEP170B	centrosomal protein 170B	O	Cep170-related|centrosomal protein of 17	CEP170B	NO	#N/A
ENSG00000099817	-0.613577	6.8887	28.5096	9.32368e-08	0.00112602	9606	5434	NULL	19	19p13.3	polymerase (RNA) II (DNA directed) polypeptide E, 25kDa	protein-coding	POLR2E	polymerase (RNA) II (DNA directed) polypeptide E, 25kDa	O	DNA directed RNA polymerase II 23 kda po	POLR2E	NO	#N/A
ENSG00000099821	-0.722037	6.52068	53.3583	2.77929e-13	3.63781e-09	9606	5442	NULL	19	19p13.3	polymerase (RNA) mitochondrial (DNA directed)	protein-coding	POLRMT	polymerase (RNA) mitochondrial (DNA directed)	O	DNA-directed RNA polymerase, mitochondri	POLRMT	NO	#N/A
ENSG00000099822	0.379403	2.54606	6.223	0.0126101	1	9606	610	NULL	19	19p13.3	hyperpolarization activated cyclic nucleotide-gated potassium channel 2	protein-coding	HCN2	hyperpolarization activated cyclic nucleotide-gated potassium channel 2	O	brain cyclic nucleotide gated channel 2|	HCN2	NO	#N/A
ENSG00000099849	-0.29423	0.989778	1.65319	0.198526	1	9606	8045	NULL	11	11p15.5	Ras association (RalGDS/AF-6) domain family (N-terminal) member 7	protein-coding	RASSF7	Ras association (RalGDS/AF-6) domain family (N-terminal) member 7	O	HRAS1-related cluster protein 1|HRAS1-re	RASSF7	NO	#N/A
ENSG00000099860	0.290066	4.38014	4.50273	0.0338408	1	9606	4616	NULL	19	19p13.3	growth arrest and DNA-damage-inducible, beta	protein-coding	GADD45B	growth arrest and DNA-damage-inducible, beta	O	growth arrest and DNA damage-inducible p	GADD45B	NO	#N/A
ENSG00000099864	0.467	1.27375	4.78706	0.0286743	1	9606	5064	NULL	19	19p13.3	paralemmin	protein-coding	PALM	paralemmin	O	paralemmin-1	PALM	NO	#N/A
ENSG00000099875	-0.170483	6.00408	1.85476	0.173231	1	9606	2872	NULL	19	19p13.3	MAP kinase interacting serine/threonine kinase 2	protein-coding	MKNK2	MAP kinase interacting serine/threonine kinase 2	O	G protein-coupled receptor kinase 7|MAP	MKNK2	NO	#N/A
ENSG00000099899	-0.304245	6.55432	8.24368	0.00408942	1	9606	27037	NULL	22	22q11.21	tRNA methyltransferase 2 homolog A (S. cerevisiae)	protein-coding	TRMT2A	tRNA methyltransferase 2 homolog A (S. cerevisiae)	O	TRM2 tRNA methyltransferase 2 homolog A|	TRMT2A	NO	#N/A
ENSG00000099901	-0.550216	7.43167	30.1912	3.91488e-08	0.000477263	9606	5902	NULL	22	22q11.21	RAN binding protein 1	protein-coding	RANBP1	RAN binding protein 1	O	ran-binding protein 1|ran-specific GTPas	RANBP1	NO	#N/A
ENSG00000099904	-0.389764	5.36902	20.7124	5.33692e-06	0.0605367	9606	29801	NULL	22	22q11.21	zinc finger, DHHC-type containing 8	protein-coding	ZDHHC8	zinc finger, DHHC-type containing 8	O	membrane-associated DHHC8 zinc finger pr	ZDHHC8	NO	#N/A
ENSG00000099910	0.592233	3.53221	22.9093	1.69827e-06	0.0196846	9606	84861	NULL	22	22q11.21	kelch-like family member 22	protein-coding	KLHL22	kelch-like family member 22	O	kelch-like 22|kelch-like protein 22	KLHL22	NO	#N/A
ENSG00000099917	-0.333993	6.83864	13.3593	0.000257145	1	9606	51586	NULL	22	22q11.2	mediator complex subunit 15	protein-coding	MED15	mediator complex subunit 15	O	CTG repeat protein 7a|PC2 (positive cofa	MED15	NO	#N/A
ENSG00000099940	0.173881	5.26644	2.96316	0.0851813	1	9606	9342	NULL	22	22q11.21	synaptosomal-associated protein, 29kDa	protein-coding	SNAP29	synaptosomal-associated protein, 29kDa	O	soluble 29 kDa NSF attachment protein|sy	SNAP29	NO	#N/A
ENSG00000099942	-0.192892	7.43127	7.29922	0.00689844	1	9606	1399	NULL	22	22q11.21	v-crk sarcoma virus CT10 oncogene homolog (avian)-like	protein-coding	CRKL	v-crk sarcoma virus CT10 oncogene homolog (avian)-like	O	crk-like protein	CRKL	NO	#N/A
ENSG00000099949	-0.450901	6.08193	22.5866	2.00876e-06	0.0232172	9606	8216	NULL	22	22q11.21|22q11.1-q11.2	leucine-zipper-like transcription regulator 1	protein-coding	LZTR1	leucine-zipper-like transcription regulator 1	O	leucine-zipper-like regulator-1|leucine-	LZTR1	NO	#N/A
ENSG00000099954	0.168987	0.216607	0.338526	0.560681	1	9606	27443	NULL	22	22q11.2	cat eye syndrome chromosome region, candidate 2	protein-coding	CECR2	cat eye syndrome chromosome region, candidate 2	O	cat eye syndrome critical region protein	CECR2	NO	#N/A
ENSG00000099956	-0.115192	5.928	1.9649	0.16099	1	9606	6598	NULL	22	22q11.23|22q11	SWI/SNF related, matrix associated, actin dependent regulator of chromatin, subfamily b, member 1	protein-coding	SMARCB1	SWI/SNF related, matrix associated, actin dependent regulator of chromatin, subfamily b, member 1	O	BRG1-associated factor 47|SNF5 homolog|S	SMARCB1	NO	#N/A
ENSG00000099957	0.445223	2.14304	7.48544	0.00621998	1	9606	9127	NULL	22	22q11.21	purinergic receptor P2X, ligand-gated ion channel, 6	protein-coding	P2RX6	purinergic receptor P2X, ligand-gated ion channel, 6	O	ATP receptor|P2X purinoceptor 6|purinerg	P2RX6	NO	#N/A
ENSG00000099968	0.0396924	6.30308	0.303212	0.581876	1	9606	23786	CD003	22	22q11.1	BCL2-like 13 (apoptosis facilitator)	protein-coding	BCL2L13	BCL2-like 13 (apoptosis facilitator)	O	bcl-2-like protein 13	BCL2L13	NO	#N/A
ENSG00000099974	1.01387	0.820865	16.861	4.022e-05	0.434255	9606	100037417	NULL	22	22q11.23	D-dopachrome tautomerase-like	protein-coding	DDTL	D-dopachrome tautomerase-like	O	D-dopachrome decarboxylase-like protein|	DDTL	NO	#N/A
ENSG00000099977	0.132285	5.0724	2.25175	0.133463	1	9606	1652	hCG_41098	22	22q11.23	D-dopachrome tautomerase	protein-coding	DDT	D-dopachrome tautomerase	O	D-dopachrome decarboxylase|phenylpyruvat	DDT	NO	#N/A
ENSG00000099991	-0.0722806	5.60425	0.751698	0.385939	1	9606	23523	NULL	22	22q11.23	calcineurin binding protein 1	protein-coding	CABIN1	calcineurin binding protein 1	O	calcineurin binding protein cabin 1|calc	CABIN1	NO	#N/A
ENSG00000099992	0.0106144	2.96694	0.00650739	0.935706	1	9606	83874	NULL	22	22q12.2	TBC1 domain family, member 10A	protein-coding	TBC1D10A	TBC1 domain family, member 10A	O	EBP50-PDX interactor of 64 kDa|EBP50-PDZ	TBC1D10A	NO	#N/A
ENSG00000099995	-0.266995	7.13003	13.0699	0.000300083	1	9606	10291	NULL	22	22q12.2	splicing factor 3a, subunit 1, 120kDa	protein-coding	SF3A1	splicing factor 3a, subunit 1, 120kDa	O	SAP 114|pre-mRNA processing 21|pre-mRNA	SF3A1	NO	#N/A
ENSG00000099998	-0.359906	1.83459	4.25125	0.0392215	1	9606	2687	NULL	22	22q11.23	gamma-glutamyltransferase 5	protein-coding	GGT5	gamma-glutamyltransferase 5	O	GGT 5|gamma-glutamyl cleaving enzyme|gam	GGT5	NO	#N/A
ENSG00000099999	-0.446289	2.70874	9.95073	0.00160785	1	9606	200312	NULL	22	22q12.2	ring finger protein 215	protein-coding	RNF215	ring finger protein 215	O	RING finger protein 215	RNF215	NO	#N/A
ENSG00000100003	0.611959	0.309311	4.61783	0.0316412	1	9606	23541	NULL	22	22q12.2	SEC14-like 2 (S. cerevisiae)	protein-coding	SEC14L2	SEC14-like 2 (S. cerevisiae)	O	SEC14-like protein 2|alpha-tocopherol-as	SEC14L2	NO	#N/A
ENSG00000100014	-0.212421	5.91501	6.54542	0.0105155	1	9606	23384	NULL	22	22q11.23	sperm antigen with calponin homology and coiled-coil domains 1-like	protein-coding	SPECC1L	sperm antigen with calponin homology and coiled-coil domains 1-like	O	SPECC1-like protein|cytokinesis and spin	SPECC1L	NO	#N/A
ENSG00000100023	0.124495	6.04491	2.56487	0.109262	1	9606	23759	NULL	22	22q11.21	peptidylprolyl isomerase (cyclophilin)-like 2	protein-coding	PPIL2	peptidylprolyl isomerase (cyclophilin)-like 2	O	PPIase|U-box domain containing 7|cycloph	PPIL2	NO	#N/A
ENSG00000100028	-0.236135	6.15047	6.37756	0.0115572	1	9606	6634	NULL	22	22q11.23	small nuclear ribonucleoprotein D3 polypeptide 18kDa	protein-coding	SNRPD3	small nuclear ribonucleoprotein D3 polypeptide 18kDa	O	small nuclear ribonucleoprotein Sm D3|sm	SNRPD3	NO	#N/A
ENSG00000100029	-0.440604	6.67994	31.3812	2.12028e-08	0.000260073	9606	23481	NULL	22	22q12.1	pescadillo ribosomal biogenesis factor 1	protein-coding	PES1	pescadillo ribosomal biogenesis factor 1	O	pescadillo homolog|pescadillo homolog 1,	PES1	NO	#N/A
ENSG00000100030	0.0724589	7.55967	0.607959	0.435557	1	9606	5594	NULL	22	22q11.21	mitogen-activated protein kinase 1	protein-coding	MAPK1	mitogen-activated protein kinase 1	O	ERK-2|MAP kinase 1|MAP kinase 2|MAP kina	MAPK1	NO	#N/A
ENSG00000100031	0.209593	1.2564	0.9615	0.326809	1	9606	2678	NULL	22	22q11.23	gamma-glutamyltransferase 1	protein-coding	GGT1	gamma-glutamyltransferase 1	O	gamma-glutamyl transpeptidase|gamma-glut	GGT1	NO	#N/A
ENSG00000100034	-0.464164	5.51547	31.0819	2.47363e-08	0.000303044	9606	9647	NULL	22	22q11.22	protein phosphatase, Mg2+/Mn2+ dependent, 1F	protein-coding	PPM1F	protein phosphatase, Mg2+/Mn2+ dependent, 1F	O	Ca(2+)/calmodulin-dependent protein kina	PPM1F	NO	#N/A
ENSG00000100036	-0.65301	4.17442	40.9823	1.53618e-10	1.95525e-06	9606	339665	NULL	22	22q12.2	solute carrier family 35, member E4	protein-coding	SLC35E4	solute carrier family 35, member E4	O	solute carrier family 35 member E4	SLC35E4	NO	#N/A
ENSG00000100038	-0.0620256	4.73167	0.318076	0.572766	1	9606	8940	NULL	22	22q11.22	topoisomerase (DNA) III beta	protein-coding	TOP3B	topoisomerase (DNA) III beta	O	DNA topoisomerase 3-beta-1|DNA topoisome	TOP3B	NO	#N/A
ENSG00000100056	-0.515349	4.44714	15.2528	9.40394e-05	0.990893	9606	8220	NULL	22	22q11.21|22q11.2	DiGeorge syndrome critical region gene 14	protein-coding	DGCR14	DiGeorge syndrome critical region gene 14	O	DiGeorge syndrome critical region gene 1	DGCR14	NO	#N/A
ENSG00000100058	-0.537156	2.37884	10.1025	0.00148065	1	9606	1416	NULL	22	22q11.2-q12.1	crystallin, beta B2 pseudogene 1	pseudo	CRYBB2P1	crystallin, beta B2 pseudogene 1	O	NULL	CRYBB2P1	NO	#N/A
ENSG00000100065	-0.447263	3.46037	13.191	0.000281301	1	9606	29775	RP5-889J22__B.2	22	22q13.1	caspase recruitment domain family, member 10	protein-coding	CARD10	caspase recruitment domain family, member 10	O	Bcl10 binding protein and activator of N	CARD10	NO	#N/A
ENSG00000100068	-0.0733762	1.18066	0.119073	0.730042	1	9606	91355	CTA-246H3.10-004	22	22q11.23	low density lipoprotein receptor-related protein 5-like	protein-coding	LRP5L	low density lipoprotein receptor-related protein 5-like	O	LRP-5-like|low-density lipoprotein recep	LRP5L	NO	#N/A
ENSG00000100075	-0.156945	5.57347	2.47749	0.115486	1	9606	6576	NULL	22	22q11.21	solute carrier family 25 (mitochondrial carrier; citrate transporter), member 1	protein-coding	SLC25A1	solute carrier family 25 (mitochondrial carrier; citrate transporter), member 1	O	citrate transport protein|solute carrier	SLC25A1	NO	#N/A
ENSG00000100077	0.163629	3.63608	2.2153	0.136648	1	9606	157	NULL	22	22q12.1	adrenergic, beta, receptor kinase 2	protein-coding	ADRBK2	adrenergic, beta, receptor kinase 2	O	G-protein-coupled receptor kinase 3|beta	ADRBK2	NO	#N/A
ENSG00000100083	-0.0159715	5.48017	0.0315265	0.859071	1	9606	26088	RP1-37E16.3	22	22q13.31	golgi-associated, gamma adaptin ear containing, ARF binding protein 1	protein-coding	GGA1	golgi-associated, gamma adaptin ear containing, ARF binding protein 1	O	ADP-ribosylation factor binding protein	GGA1	NO	#N/A
ENSG00000100084	-0.34462	6.04722	16.5331	4.78088e-05	0.513466	9606	7290	NULL	22	22q11.21	histone cell cycle regulator	protein-coding	HIRA	histone cell cycle regulator	O	DiGeorge critical region gene 1|HIR hist	HIRA	NO	#N/A
ENSG00000100092	0.0426471	3.22417	0.0841546	0.771744	1	9606	23616	NULL	22	22q13.1	SH3-domain binding protein 1	protein-coding	SH3BP1	SH3-domain binding protein 1	O	3BP-1|SH3 domain binding protein 1|SH3 d	SH3BP1	NO	#N/A
ENSG00000100097	0.196172	7.21428	2.58769	0.107698	1	9606	3956	NULL	22	22q13.1	lectin, galactoside-binding, soluble, 1	protein-coding	LGALS1	lectin, galactoside-binding, soluble, 1	O	14 kDa laminin-binding protein|14 kDa le	LGALS1	NO	#N/A
ENSG00000100099	0.267715	4.8024	9.28729	0.00230749	1	9606	89781	CTB-1048E9.4	22	22cen-q12.3	Hermansky-Pudlak syndrome 4	protein-coding	HPS4	Hermansky-Pudlak syndrome 4	O	Hermansky-Pudlak syndrome 4 protein|ligh	HPS4	NO	#N/A
ENSG00000100100	-0.215778	0.928667	0.884687	0.346921	1	9606	113791	NULL	22	22q12.2	phosphoinositide-3-kinase interacting protein 1	protein-coding	PIK3IP1	phosphoinositide-3-kinase interacting protein 1	O	kringle domain-containing protein HGFL|p	PIK3IP1	NO	#N/A
ENSG00000100104	0.104146	3.64446	0.66743	0.413949	1	9606	402055	CTB-1048E9.5	22	22q12.1	SRR1 domain containing	protein-coding	SRRD	SRR1 domain containing	O	SRR1 domain-containing protein|SRR1-like	SRRD	NO	#N/A
ENSG00000100105	-0.0674311	5.1001	0.56873	0.450764	1	9606	23598	NULL	22	22q12.2	POZ (BTB) and AT hook containing zinc finger 1	protein-coding	PATZ1	POZ (BTB) and AT hook containing zinc finger 1	O	BTB-POZ domain zinc finger transcription	PATZ1	NO	#N/A
ENSG00000100106	0.258596	4.95456	7.93751	0.00484204	1	9606	11078	HRIHFB2122	22	22q13.1	TRIO and F-actin binding protein	protein-coding	TRIOBP	TRIO and F-actin binding protein	O	TRIO and F-actin-binding protein|protein	TRIOBP	NO	#N/A
ENSG00000100109	-0.253759	5.06823	7.87428	0.00501429	1	9606	24144	CTA-445C9.9	22	22q12.1	tuftelin interacting protein 11	protein-coding	TFIP11	tuftelin interacting protein 11	O	STIP-1|septin and tuftelin-interacting p	TFIP11	NO	#N/A
ENSG00000100116	0.175627	3.35843	1.7635	0.184189	1	9606	23464	NULL	22	22q13.1	glycine C-acetyltransferase	protein-coding	GCAT	glycine C-acetyltransferase	O	2-amino-3-ketobutyrate coenzyme A ligase	GCAT	NO	#N/A
ENSG00000100124	-0.364991	4.70291	12.3384	0.000443726	1	9606	129138	NULL	22	22q13.1	ankyrin repeat domain 54	protein-coding	ANKRD54	ankyrin repeat domain 54	O	ankyrin repeat domain-containing protein	ANKRD54	NO	#N/A
ENSG00000100129	-0.0502588	7.84047	0.603897	0.437095	1	9606	51386	AL022311.1	22	22q	eukaryotic translation initiation factor 3, subunit L	protein-coding	EIF3L	eukaryotic translation initiation factor 3, subunit L	O	eIEF associated protein HSPC021|eukaryot	EIF3L	NO	#N/A
ENSG00000100138	-0.0900686	6.8542	1.45404	0.227881	1	9606	4809	CTA-216E10.8	22	22q13	NHP2 non-histone chromosome protein 2-like 1 (S. cerevisiae)	protein-coding	NHP2L1	NHP2 non-histone chromosome protein 2-like 1 (S. cerevisiae)	O	NHP2-like protein 1|U4/U6.U5 tri-snRNP 1	NHP2L1	NO	#N/A
ENSG00000100139	-0.383464	5.95959	25.2791	4.96063e-07	0.00585553	9606	85377	AL022311.2	22	22q13.1	MICAL-like 1	protein-coding	MICALL1	MICAL-like 1	O	MICAL-like protein 1|molecule interactin	MICALL1	NO	#N/A
ENSG00000100142	-0.471237	5.34247	11.2837	0.000781911	1	9606	5435	NULL	22	22q13.1	polymerase (RNA) II (DNA directed) polypeptide F	protein-coding	POLR2F	polymerase (RNA) II (DNA directed) polypeptide F	O	DNA directed RNA polymerase II 14.4 kda	POLR2F	NO	#N/A
ENSG00000100147	0.0506078	2.20293	0.0994753	0.75246	1	9606	79879	RP5-821D11.6	22	22q13.2	coiled-coil domain containing 134	protein-coding	CCDC134	coiled-coil domain containing 134	O	coiled-coil domain-containing protein 13	CCDC134	NO	#N/A
ENSG00000100150	-0.0019052	3.23881	0.000201283	0.98868	1	9606	9681	LL22NC03-113A11.1	22	22q12.3	DEP domain containing 5	protein-coding	DEPDC5	DEP domain containing 5	O	DEP domain-containing protein 5	DEPDC5	NO	#N/A
ENSG00000100151	0.078419	3.87649	0.477687	0.489472	1	9606	9463	RP5-1039K5.11-004	22	22q13.1	protein interacting with PRKCA 1	protein-coding	PICK1	protein interacting with PRKCA 1	O	PRKCA-binding protein|protein interactin	PICK1	NO	#N/A
ENSG00000100154	-0.53901	3.32	20.0472	7.55535e-06	0.0850052	9606	23331	RP3-477H23.1	22	22q12.1	tetratricopeptide repeat domain 28	protein-coding	TTC28	tetratricopeptide repeat domain 28	O	TPR repeat protein 28|TPR repeat-contain	TTC28	NO	#N/A
ENSG00000100162	0.030615	4.25183	0.0704648	0.790661	1	9606	79019	CTA-250D10.18-008	22	22q13.2	centromere protein M	protein-coding	CENPM	centromere protein M	O	interphase centromere complex protein 39	CENPM	NO	#N/A
ENSG00000100181	0.121416	5.10792	2.12536	0.144879	1	9606	387590	NULL	22	22q11.1	transmembrane phosphatase with tensin homology pseudogene 1	pseudo	TPTEP1	transmembrane phosphatase with tensin homology pseudogene 1	O	NULL	TPTEP1	NO	#N/A
ENSG00000100196	0.367873	2.66596	6.73833	0.00943629	1	9606	11015	RP3-434P1.3	22	22q13.1	KDEL (Lys-Asp-Glu-Leu) endoplasmic reticulum protein retention receptor 3	protein-coding	KDELR3	KDEL (Lys-Asp-Glu-Leu) endoplasmic reticulum protein retention receptor 3	O	ER lumen protein retaining receptor 3|KD	KDELR3	NO	#N/A
ENSG00000100201	0.284844	8.23469	16.5141	4.82888e-05	0.518477	9606	10521	RP3-434P1.1	22	22q13.1	DEAD (Asp-Glu-Ala-Asp) box helicase 17	protein-coding	DDX17	DEAD (Asp-Glu-Ala-Asp) box helicase 17	O	DEAD (Asp-Glu-Ala-Asp) box polypeptide 1	DDX17	NO	#N/A
ENSG00000100207	-0.139946	5.1316	1.96698	0.160768	1	9606	6942	RP4-669P10.13-001	22	22q13.3|22q13.3	transcription factor 20 (AR1)	protein-coding	TCF20	transcription factor 20 (AR1)	O	SPRE-binding protein|TCF-20|nuclear fact	TCF20	NO	#N/A
ENSG00000100209	0.00113629	2.23647	5.11493e-05	0.994294	1	9606	150274	RP3-366L4.2	22	22q12.1	HscB iron-sulfur cluster co-chaperone homolog (E. coli)	protein-coding	HSCB	HscB iron-sulfur cluster co-chaperone homolog (E. coli)	O	DnaJ (Hsp40) homolog, subfamily C, membe	HSCB	NO	#N/A
ENSG00000100211	-0.27175	2.71031	2.97769	0.0844195	1	9606	25776	RP3-508I15.8	22	22q12	chibby homolog 1 (Drosophila)	protein-coding	CBY1	chibby homolog 1 (Drosophila)	O	ARPP-binding protein|PKD2 interactor, Go	CBY1	NO	#N/A
[truncated: 12,235 more rows]

## Sheet: TRIAM_SIG
identifier	log2FoldChange	logCPM	LR	pvalue	padj	tax_id	GeneID	LocusTag	chromosome	map_location	description	type	Symbol_autho	name	status	other	Symbol	diffexpressed	delabel
[truncated: 13,686 more rows]

[truncated: 1 more sheets: TPL_SIG]
